# Supplementary material
Source: PubMed Central journal article supplement (PMC7451020)
Supplement: NIHMS1618197-supplement-Supplementary_Material.pdf [file NIHMS1618197-supplement-Supplementary_Material.pdf]

# Cancer transcriptomic profiling from rapidly enriched circulating tumor cells

**Authors:** Gareth J Morrison<sup>1</sup>, Alexander T Cunha<sup>1</sup>, Nita Jojo<sup>1</sup>, Yucheng Xu<sup>1</sup>, Yili Xu<sup>2</sup>, Eric Kwok<sup>2</sup>, Peggy Robinson<sup>3</sup>, Tanya Dorff<sup>1</sup>, David Quinn<sup>1</sup>, John Carpten<sup>2</sup>, Zarko Manojlovic<sup>2</sup>, Amir Goldkorn<sup>1\*</sup>

## Table of Contents

|                                       |          |
|---------------------------------------|----------|
| <b>1. Supplementary Table 1 .....</b> | <b>2</b> |
| <b>2. Supplementary Table 2 .....</b> | <b>3</b> |
| <b>3. Supplementary Table 3 .....</b> | <b>4</b> |
| <b>4. Supplementary Data 1.....</b>   | <b>5</b> |

## Supplementary Tables

**Supplementary Table 1. Primer sequences used in the study.**

| <b>Gene</b>    | <b>Forward Primer Sequence</b> | <b>Reverse Primer Sequence</b> |
|----------------|--------------------------------|--------------------------------|
| $\beta$ -Actin | AGAGCTACGAGCTGCCTGAC           | AGCACTGTGTTGGCGTACAG           |
| AR             | ACTGCCAGGGACCATGTTTT           | CTTCTGTTTCCCTTCAGCGG           |
| PSMA           | GAATGCCAGAGGGCGATCTA           | AATGACTCCTTTGGCCCCTG           |
| PSA            | CGAGAAGCATTCCCAACCCT           | TCACGCTTTTGTTCCTGATGC          |
| EpCAM          | GCTGGCCGTAAACTGCTTTG           | ACATTTGGCAGCCAGCTTTG           |

**Supplementary Table 2. CellSearch counts for mCRPC patients.**

| <b>Patient #</b> | <b>CellSearch CTC counts</b> |
|------------------|------------------------------|
| 1                | 18                           |
| 2                | 695                          |
| 3                | 690                          |
| 4                | 1192                         |
| 5                | 17                           |

**Supplementary Table 3. NextSeq sequencing run metrics.**

| <i>Sample Identifier</i>       | <i>M Reads Mapped</i> | <i>% RNA</i> | <i>% mRNA</i> | <i>% Aligned</i> | <i>Insert Size (bp)</i> | <i>% Dups</i> | <i>% Aligned</i> | <i>M Aligned</i> |
|--------------------------------|-----------------------|--------------|---------------|------------------|-------------------------|---------------|------------------|------------------|
| <i>22Rv1:PBMC (100:0)</i>      | 86                    | 10.9         | 64.0          | 92               | 199                     | 93.7          | 71.3             | 23.1             |
| <i>22Rv1:PBMC (50:50)</i>      | 80.2                  | 11.1         | 55.0          | 94               | 182                     | 85.4          | 71.9             | 21.1             |
| <i>22Rv1:PBMC (25:75)</i>      | 74.7                  | 10.5         | 52.1          | 94               | 186                     | 85.2          | 73.9             | 20.6             |
| <i>22Rv1:PBMC (5:95)</i>       | 66.4                  | 7.5          | 47.1          | 95               | 185                     | 82.3          | 79.5             | 21.1             |
| <i>22Rv1:PBMC (0:100)</i>      | 81.3                  | 11.1         | 44.0          | 95               | 177                     | 87.0          | 76.1             | 23.2             |
| <i>Patient 1- PBMC</i>         | 63.7                  | 8.7          | 50.5          | 95               | 185                     | 83.1          | 79.8             | 20.1             |
| <i>Patient 2- PBMC</i>         | 93.1                  | 18.0         | 50.1          | 91               | 186                     | 86.1          | 62.3             | 19.3             |
| <i>Patient 3- PBMC</i>         | 82.0                  | 15.6         | 55.3          | 96               | 182                     | 88.1          | 66.1             | 17.0             |
| <i>Patient 4- PBMC</i>         | 71.8                  | 9.4          | 51.6          | 96               | 170                     | 89.7          | 79.3             | 22.0             |
| <i>Patient 5- PBMC</i>         | 94.1                  | 23.0         | 44.3          | 95               | 185                     | 85.6          | 63.6             | 18.8             |
| <i>Patient 1- CTC enriched</i> | 51.4                  | 7.0          | 63.6          | 95               | 143                     | 99.3          | 78.0             | 14.9             |
| <i>Patient 2- CTC enriched</i> | 49.1                  | 5.9          | 57.4          | 93               | 115                     | 99.0          | 77.2             | 14.2             |
| <i>Patient 3- CTC enriched</i> | 45.3                  | 6.5          | 63.5          | 91               | 111                     | 98.9          | 76.9             | 14.3             |
| <i>Patient 4- CTC enriched</i> | 42.4                  | 9.2          | 59.3          | 76               | 122                     | 98.7          | 59.9             | 11.2             |
| <i>Patient 5- CTC enriched</i> | 13.4                  | 0.1          | 86.6          | 10               | 308                     | 98.4          | 9.7              | 5.7              |

# Supplementary Data 1. Raw data files generated from Ingenuity Pathway Analysis.

## Gene List

| Expr Log Ratio | ID              | Symbol                 | Entrez Gene Name                                                                 | Location            |
|----------------|-----------------|------------------------|----------------------------------------------------------------------------------|---------------------|
| 2.453          | ENSG00000202198 | 75K                    | chondroitin sulfate proteoglycan 4 pseudogene 3 Y-linked                         | Other               |
| 2.357          | ENSG00000167972 | ABCA3                  | ATP binding cassette subfamily A member 3                                        | Plasma Membrane     |
| 2.758          | ENSG00000108846 | ABCC3                  | ATP binding cassette subfamily C member 3                                        | Plasma Membrane     |
| 1.718          | ENSG00000204574 | ABCF1                  | ATP binding cassette subfamily F member 1                                        | Cytoplasm           |
| 2.646          | ENSG00000173210 | ABLIM3                 | actin binding LIM protein family member 3                                        | Cytoplasm           |
| 8.731          | ENSG00000253190 | AC0840823              | chondroitin sulfate proteoglycan 4 pseudogene 3 Y-linked                         | Other               |
| 3.402          | ENSG00000213846 | AC0986142              | chondroitin sulfate proteoglycan 4 pseudogene 3 Y-linked                         | Other               |
| 1.702          | ENSG00000078124 | ACER3                  | alkaline ceramidase 3                                                            | Cytoplasm           |
| 2.854          | ENSG00000111644 | ACRBP                  | acrosin binding protein                                                          | Extracellular Space |
| 9.177          | ENSG00000166743 | ACSM1                  | acyl-CoA synthetase medium chain family member 1                                 | Cytoplasm           |
| 2.129          | ENSG00000133627 | ACTR3B                 | actin related protein 3B                                                         | Cytoplasm           |
| 4.826          | ENSG00000154734 | ADAMTS1                | ADAM metalloproteinase with thrombospondin type 1 motif 1                        | Extracellular Space |
| 4.463          | ENSG00000174233 | ADCY6                  | adenylate cyclase 6                                                              | Plasma Membrane     |
| 6.263          | ENSG00000164199 | ADGRV1                 | adhesion G protein-coupled receptor V1                                           | Plasma Membrane     |
| 1.744          | ENSG00000182551 | ADI1                   | acireductone dioxygenase 1                                                       | Nucleus             |
| 6.377          | ENSG00000043591 | ADRB1                  | adrenoceptor beta 1                                                              | Plasma Membrane     |
| 2.813          | ENSG00000196526 | AFAP1                  | actin filament associated protein 1                                              | Cytoplasm           |
| 2.446          | ENSG00000169129 | AFAP1L2                | actin filament associated protein 1 like 2                                       | Cytoplasm           |
| 4.047          | ENSG00000130396 | AFDN                   | afadin, adherens junction formation factor                                       | Nucleus             |
| 9.684          | ENSG00000106541 | AGR2                   | anterior gradient 2, protein disulphide isomerase family member                  | Extracellular Space |
| 4.549          | ENSG00000188157 | AGRN                   | agrin                                                                            | Plasma Membrane     |
| 4.88           | ENSG00000131016 | AKAP12                 | A-kinase anchoring protein 12                                                    | Cytoplasm           |
| 2.194          | ENSG00000170017 | ALCAM                  | activated leukocyte cell adhesion molecule                                       | Plasma Membrane     |
| 9.375          | ENSG00000184254 | ALDH1A3                | aldehyde dehydrogenase 1 family member A3                                        | Cytoplasm           |
| 5.182          | ENSG00000164904 | ALDH7A1                | aldehyde dehydrogenase 7 family member A1                                        | Cytoplasm           |
| 2.942          | ENSG00000123505 | AMD1                   | adenosylmethionine decarboxylase 1                                               | Cytoplasm           |
| 11.436         | ENSG00000114019 | AMOTL2                 | angiominin like 2                                                                | Plasma Membrane     |
| 2.88           | ENSG00000151150 | ANK3                   | ankyrin 3                                                                        | Plasma Membrane     |
| 2.695          | ENSG00000164236 | ANKRD33B               | ankyrin repeat domain 33B                                                        | Other               |
| 1.98           | ENSG00000174501 | ANKRD36C               | ankyrin repeat domain 36C                                                        | Other               |
| 2.99           | ENSG00000148120 | AOPEP                  | aminopeptidase O (putative)                                                      | Cytoplasm           |
| 5.211          | ENSG00000129354 | AP1M2                  | adaptor related protein complex 1 subunit mu 2                                   | Cytoplasm           |
| 2.02           | ENSG00000136044 | APPL2                  | adaptor protein, phosphotyrosine interacting with PH domain and leucine zipper 2 | Cytoplasm           |
| 7.904          | ENSG00000169083 | AR                     | androgen receptor                                                                | Nucleus             |
| 6.882          | ENSG00000112379 | ARFGEF3                | ARFGEF family member 3                                                           | Other               |
| 2.968          | ENSG00000146376 | ARHGAP18               | Rho GTPase activating protein 18                                                 | Cytoplasm           |
| 3.158          | ENSG00000107863 | ARHGAP21               | Rho GTPase activating protein 21                                                 | Cytoplasm           |
| 3.255          | ENSG00000134909 | ARHGAP32               | Rho GTPase activating protein 32                                                 | Cytoplasm           |
| 3.572          | ENSG00000047648 | ARHGAP6                | Rho GTPase activating protein 6                                                  | Cytoplasm           |
| 9.966          | ENSG00000130762 | ARHGEF16               | Rho guanine nucleotide exchange factor 16                                        | Cytoplasm           |
| 10.604         | ENSG00000114790 | ARHGEF26               | Rho guanine nucleotide exchange factor 26                                        | Plasma Membrane     |
| 5.794          | ENSG00000214944 | ARHGEF28               | Rho guanine nucleotide exchange factor 28                                        | Cytoplasm           |
| 8.505          | ENSG00000236699 | ARHGEF38               | Rho guanine nucleotide exchange factor 38                                        | Other               |
| 1.945          | ENSG00000179361 | ARID3B                 | AT-rich interaction domain 3B                                                    | Nucleus             |
| 7.826          | ENSG00000260896 | ARLNC1                 | androgen receptor regulated long noncoding RNA 1                                 | Other               |
| 6.736          | ENSG00000158301 | ARMCX5-GPRASP2/GPRASP2 | G protein-coupled receptor associated sorting protein 2                          | Plasma Membrane     |
| 3.864          | ENSG00000151693 | ASAP2                  | ArfGAP with SH3 domain, ankyrin repeat and PH domain 2                           | Nucleus             |
| 5.324          | ENSG00000088280 | ASAP3                  | ArfGAP with SH3 domain, ankyrin repeat and PH domain 3                           | Plasma Membrane     |
| 2.955          | ENSG00000070669 | ASNS                   | asparagine synthetase (glutamine-hydrolyzing)                                    | Cytoplasm           |
| 11.256         | ENSG00000130707 | ASS1                   | argininosuccinate synthase 1                                                     | Cytoplasm           |
| 7.232          | ENSG00000162772 | ATF3                   | activating transcription factor 3                                                | Nucleus             |
| 2.131          | ENSG00000163399 | ATP1A1                 | ATPase Na <sup>+</sup> /K <sup>+</sup> transporting subunit alpha 1              | Plasma Membrane     |
| 2.439          | ENSG00000017260 | ATP2C1                 | ATPase secretory pathway Ca <sup>2+</sup> transporting 1                         | Cytoplasm           |
| 12.65          | ENSG00000081923 | ATP8B1                 | ATPase phospholipid transporting 8B1                                             | Plasma Membrane     |
| 3.012          | ENSG00000054793 | ATP9A                  | ATPase phospholipid transporting 9A (putative)                                   | Cytoplasm           |
| 13.094         | ENSG00000160862 | AZGP1                  | alpha-2-glycoprotein 1, zinc-binding                                             | Extracellular Space |
| 4.777          | ENSG00000182240 | BACE2                  | beta-secretase 2                                                                 | Cytoplasm           |
| 8.998          | ENSG00000006453 | BAIAP2L1               | BAI1 associated protein 2 like 1                                                 | Cytoplasm           |
| 5.687          | ENSG00000095739 | BAMBI                  | BMP and activin membrane bound inhibitor                                         | Plasma Membrane     |
| 2.606          | ENSG00000153064 | BANK1                  | B cell scaffold protein with ankyrin repeats 1                                   | Extracellular Space |
| 9.637          | ENSG00000043039 | BARX2                  | BARX homeobox 2                                                                  | Nucleus             |
| 2.846          | ENSG00000105327 | BBC3                   | BCL2 binding component 3                                                         | Cytoplasm           |
| 9.149          | ENSG00000050820 | BCAR1                  | BCAR1 scaffold protein, Cas family member                                        | Plasma Membrane     |
| 9.572          | ENSG00000064787 | BCAS1                  | breast carcinoma amplified sequence 1                                            | Plasma Membrane     |
| 2.038          | ENSG00000183337 | BCOR                   | BCL6 corepressor                                                                 | Nucleus             |
| 5.93           | ENSG00000236824 | BCYRN1                 | brain cytoplasmic RNA 1                                                          | Other               |
| 2.122          | ENSG00000166681 | BEX3                   | brain expressed X-linked 3                                                       | Cytoplasm           |
| 3.212          | ENSG00000151746 | BICD1                  | BICD cargo adaptor 1                                                             | Cytoplasm           |
| 9.138          | ENSG00000162069 | BICDL2                 | BICD family like cargo adaptor 2                                                 | Other               |
| 11.031         | ENSG00000138696 | BMPRI1B                | bone morphogenetic protein receptor type 1B                                      | Plasma Membrane     |
| 3.586          | ENSG00000176171 | BNIP3                  | BCL2 interacting protein 3                                                       | Cytoplasm           |
| 7.47           | ENSG00000164061 | BSN                    | bassoon presynaptic cytomatrix protein                                           | Plasma Membrane     |
| 5.853          | ENSG00000270689 | BUD13P1                | BUD13 homolog pseudogene 1                                                       | Other               |
| 4.555          | ENSG00000175746 | C15orf54               | chromosome 15 open reading frame 54 (putative)                                   | Other               |
| 24.965         | ENSG00000251435 | C1GALT1P2              | C1GALT1 pseudogene 2                                                             | Other               |
| 4.706          | ENSG00000162817 | C1orf115               | chromosome 1 open reading frame 115                                              | Other               |
| 5.814          | ENSG00000182795 | C1orf116               | chromosome 1 open reading frame 116                                              | Cytoplasm           |
| 3.102          | ENSG00000119280 | C1orf198               | chromosome 1 open reading frame 198                                              | Cytoplasm           |
| 3.146          | ENSG00000116667 | C1orf21                | chromosome 1 open reading frame 21                                               | Other               |
| 7.247          | ENSG00000114529 | C3orf52                | chromosome 3 open reading frame 52                                               | Other               |
| 6.186          | ENSG00000188112 | C6orf132               | chromosome 6 open reading frame 132                                              | Other               |
| 9.779          | ENSG00000188959 | C9orf152               | chromosome 9 open reading frame 152                                              | Other               |
| 25.532         | ENSG00000074410 | CA12                   | carbonic anhydrase 12                                                            | Plasma Membrane     |
| 3.023          | ENSG00000120159 | CAAP1                  | caspace activity and apoptosis inhibitor 1                                       | Other               |
| 4.369          | ENSG00000157388 | CACNA1D                | calcium voltage-gated channel subunit alpha1 D                                   | Plasma Membrane     |
| 8.404          | ENSG00000075461 | CACNG4                 | calcium voltage-gated channel auxiliary subunit gamma 4                          | Plasma Membrane     |
| 9.176          | ENSG00000081803 | CADPS2                 | calcium dependent secretion activator 2                                          | Plasma Membrane     |
| 4.349          | ENSG00000122786 | CALD1                  | caldesmon 1                                                                      | Cytoplasm           |
| 5.099          | ENSG00000178033 | CALHM5                 | calcium homeostasis modulator family member 5                                    | Cytoplasm           |
| 6.661          | ENSG00000162545 | CAMK2N1                | calcium/calmodulin dependent protein kinase II inhibitor 1                       | Plasma Membrane     |

|        |                 |              |                                                                  |                     |
|--------|-----------------|--------------|------------------------------------------------------------------|---------------------|
| 4.025  | ENSG00000118200 | CAMSAP2      | calmodulin regulated spectrin associated protein family member 2 | Cytoplasm           |
| 5.88   | ENSG00000076826 | CAMSAP3      | calmodulin regulated spectrin associated protein family member 3 | Cytoplasm           |
| 2.689  | ENSG00000171735 | CAMTA1       | calmodulin binding transcription activator 1                     | Other               |
| 2.208  | ENSG00000171302 | CANT1        | calcium activated nucleotidase 1                                 | Extracellular Space |
| 8.727  | ENSG00000162949 | CAPN13       | calpain 13                                                       | Cytoplasm           |
| 6.819  | ENSG00000100065 | CARD10       | caspace recruitment domain family member 10                      | Cytoplasm           |
| 2.643  | ENSG00000079691 | CARMIL1      | capping protein regulator and myosin 1 linker 1                  | Cytoplasm           |
| 2.085  | ENSG00000164305 | CASP3        | caspace 3                                                        | Cytoplasm           |
| 5.524  | ENSG00000087589 | CASS4        | Cas scaffold protein family member 4                             | Plasma Membrane     |
| 2.563  | ENSG00000130940 | CASZ1        | castor zinc finger 1                                             | Nucleus             |
| 2.737  | ENSG00000168497 | CAVIN2       | caveolae associated protein 2                                    | Plasma Membrane     |
| 8.692  | ENSG00000160200 | CBS/CBSL     | cystathionine-beta-synthase                                      | Cytoplasm           |
| 6.2    | ENSG00000173894 | CBX2         | chromobox 2                                                      | Nucleus             |
| 1.923  | ENSG00000165813 | CCDC186      | coiled-coil domain containing 186                                | Other               |
| 10.764 | ENSG00000163040 | CCDC74A      | coiled-coil domain containing 74A                                | Other               |
| 2.026  | ENSG00000119242 | CCDC92       | coiled-coil domain containing 92                                 | Cytoplasm           |
| 11.623 | ENSG00000142871 | CCN1         | cellular communication network factor 1                          | Extracellular Space |
| 8.732  | ENSG00000110092 | CCND1        | cyclin D1                                                        | Nucleus             |
| 3.4    | ENSG00000183813 | CCR4         | C-C motif chemokine receptor 4                                   | Plasma Membrane     |
| 6.564  | ENSG00000103855 | CD276        | CD276 molecule                                                   | Plasma Membrane     |
| 2.323  | ENSG00000110848 | CD69         | CD69 molecule                                                    | Plasma Membrane     |
| 3.583  | ENSG0000010278  | CD9          | CD9 molecule                                                     | Plasma Membrane     |
| 3.312  | ENSG00000106993 | CDC37L1      | cell division cycle 37 like 1                                    | Cytoplasm           |
| 2.879  | ENSG00000198752 | CDC42BPB     | CDC42 binding protein kinase beta                                | Cytoplasm           |
| 3.594  | ENSG00000171219 | CDC42BPG     | CDC42 binding protein kinase gamma                               | Cytoplasm           |
| 6.091  | ENSG00000039068 | CDH1         | cadherin 1                                                       | Plasma Membrane     |
| 2.441  | ENSG00000155111 | CDK19        | cyclin dependent kinase 19                                       | Nucleus             |
| 2.891  | ENSG00000151725 | CENPU        | centromere protein U                                             | Nucleus             |
| 6.786  | ENSG00000099814 | CEP170B      | centrosomal protein 170B                                         | Other               |
| 2.738  | ENSG00000183137 | CEP57L1      | centrosomal protein 57 like 1                                    | Other               |
| 5.501  | ENSG00000213085 | CFAP45       | cilia and flagella associated protein 45                         | Nucleus             |
| 8.338  | ENSG00000105792 | CFAP69       | cilia and flagella associated protein 69                         | Cytoplasm           |
| 9.164  | ENSG00000143375 | CGN          | cingulin                                                         | Plasma Membrane     |
| 12.519 | ENSG00000128849 | CGNL1        | cingulin like 1                                                  | Plasma Membrane     |
| 2.313  | ENSG00000110721 | CHKA         | choline kinase alpha                                             | Cytoplasm           |
| 11.662 | ENSG00000164695 | CHMP4C       | charged multivesicular body protein 4C                           | Cytoplasm           |
| 2.279  | ENSG00000080605 | CHMP5        | charged multivesicular body protein 5                            | Cytoplasm           |
| 10.099 | ENSG00000168539 | CHRM1        | cholinergic receptor muscarinic 1                                | Plasma Membrane     |
| 3.643  | ENSG00000166165 | CKB          | creatine kinase B                                                | Cytoplasm           |
| 2.241  | ENSG00000109572 | CLCN3        | chloride voltage-gated channel 3                                 | Plasma Membrane     |
| 8.59   | ENSG00000165215 | CLDN3        | claudin 3                                                        | Plasma Membrane     |
| 13.904 | ENSG00000189143 | CLDN4        | claudin 4                                                        | Plasma Membrane     |
| 4.919  | ENSG00000181885 | CLDN7        | claudin 7                                                        | Plasma Membrane     |
| 4.185  | ENSG00000165682 | CLEC1B       | C-type lectin domain family 1 member B                           | Plasma Membrane     |
| 11.801 | ENSG00000153132 | CLGN         | calmegin                                                         | Cytoplasm           |
| 2.048  | ENSG00000169504 | CLIC4        | chloride intracellular channel 4                                 | Plasma Membrane     |
| 1.928  | ENSG00000106665 | CLIP2        | CAP-Gly domain containing linker protein 2                       | Cytoplasm           |
| 5.118  | ENSG00000142675 | CNKSR1       | connector enhancer of kinase suppressor of Ras 1                 | Cytoplasm           |
| 5.176  | ENSG00000153721 | CNKSR3       | CNKSR family member 3                                            | Plasma Membrane     |
| 5.781  | ENSG00000117519 | CNN3         | calponin 3                                                       | Cytoplasm           |
| 3.225  | ENSG00000162852 | CNST         | consortin, connexin sorting protein                              | Cytoplasm           |
| 9.728  | ENSG00000106078 | COBL         | cordons-bleu WH2 repeat protein                                  | Plasma Membrane     |
| 4.102  | ENSG00000082438 | COBL11       | cordons-bleu WH2 repeat protein like 1                           | Extracellular Space |
| 4.962  | ENSG00000171502 | COL24A1      | collagen type XXIV alpha 1 chain                                 | Extracellular Space |
| 6.951  | ENSG00000188153 | COL4A5       | collagen type IV alpha 5 chain                                   | Extracellular Space |
| 4.099  | ENSG00000163359 | COL6A3       | collagen type VI alpha 3 chain                                   | Extracellular Space |
| 13.315 | ENSG00000196167 | COLCA1       | colorectal cancer associated 1                                   | Other               |
| 5.598  | ENSG00000158270 | COLEC12      | collectin subfamily member 12                                    | Plasma Membrane     |
| 8.459  | ENSG00000196353 | CPNE4        | copine 4                                                         | Cytoplasm           |
| 2.804  | ENSG00000177685 | CRACR2B      | calcium release activated channel regulator 2B                   | Cytoplasm           |
| 6.477  | ENSG00000130545 | CRB3         | crumbs cell polarity complex component 3                         | Cytoplasm           |
| 4.311  | ENSG00000143578 | CREB3L4      | cAMP responsive element binding protein 3 like 4                 | Nucleus             |
| 6.116  | ENSG00000182809 | CRIP2        | cysteine rich protein 2                                          | Nucleus             |
| 9.759  | ENSG00000121005 | CRISPLD1     | cysteine rich secretory protein LCCL domain containing 1         | Cytoplasm           |
| 6.18   | ENSG00000245694 | CRNDE        | colorectal neoplasia differentially expressed                    | Other               |
| 3.489  | ENSG00000005469 | CROT         | carnitine O-octanoyltransferase                                  | Cytoplasm           |
| 1.887  | ENSG00000144655 | CSRN1        | cysteine and serine rich nuclear protein 1                       | Nucleus             |
| 2.807  | ENSG00000253683 | CTB_79E83    | chondroitin sulfate proteoglycan 4 pseudogene 3 Y-linked         | Other               |
| 5.192  | ENSG00000267383 | CTC_260E66   | chondroitin sulfate proteoglycan 4 pseudogene 3 Y-linked         | Other               |
| 9.525  | ENSG00000254434 | CTD_2555I51  | chondroitin sulfate proteoglycan 4 pseudogene 3 Y-linked         | Other               |
| 3.667  | ENSG00000260035 | CTD_2651B206 | chondroitin sulfate proteoglycan 4 pseudogene 3 Y-linked         | Other               |
| 2.552  | ENSG00000198561 | CTNND1       | catenin delta 1                                                  | Nucleus             |
| 3.895  | ENSG00000085733 | CTTN         | cortactin                                                        | Plasma Membrane     |
| 4.955  | ENSG00000111249 | CUX2         | cut like homeobox 2                                              | Nucleus             |
| 12.599 | ENSG00000154639 | CXADR        | CXADR Ig-like cell adhesion molecule                             | Plasma Membrane     |
| 6.31   | ENSG00000081041 | CXCL2        | C-X-C motif chemokine ligand 2                                   | Extracellular Space |
| 7.32   | ENSG00000163734 | CXCL3        | C-X-C motif chemokine ligand 3                                   | Extracellular Space |
| 2.683  | ENSG00000163735 | CXCL5        | C-X-C motif chemokine ligand 5                                   | Extracellular Space |
| 2.033  | ENSG00000171604 | CXXC5        | CXXC finger protein 5                                            | Nucleus             |
| 3.552  | ENSG00000166347 | CYB5A        | cytochrome b5 type A                                             | Cytoplasm           |
| 10.625 | ENSG00000134716 | CYP2J2       | cytochrome P450 family 2 subfamily J member 2                    | Cytoplasm           |
| 11.393 | ENSG00000239402 | CYP4F62P     | cytochrome P450 family 4 subfamily F member 62, pseudogene       | Other               |
| 1.427  | ENSG00000105443 | CYTH2        | cytohesin 2                                                      | Cytoplasm           |
| 3.759  | ENSG00000100592 | DAAM1        | dishevelled associated activator of morphogenesis 1              | Cytoplasm           |
| 3.052  | ENSG00000153071 | DAB2         | DAB adaptor protein 2                                            | Plasma Membrane     |
| 3.008  | ENSG00000167657 | DAPK3        | death associated protein kinase 3                                | Cytoplasm           |
| 3.922  | ENSG00000113758 | DBN1         | drebrin 1                                                        | Cytoplasm           |
| 5.017  | ENSG00000170390 | DCLK2        | doublecortin like kinase 2                                       | Cytoplasm           |
| 4.629  | ENSG00000204580 | DDR1         | discoidin domain receptor tyrosine kinase 1                      | Plasma Membrane     |
| 4.463  | ENSG00000175984 | DENND2C      | DENN domain containing 2C                                        | Other               |
| 7.912  | ENSG00000165507 | DEPP1        | DEPP1 autophagy regulator                                        | Cytoplasm           |

|        |                 |            |                                                                       |                     |
|--------|-----------------|------------|-----------------------------------------------------------------------|---------------------|
| 4.395  | ENSG00000155792 | DEPTOR     | DEP domain containing MTOR interacting protein                        | Cytoplasm           |
| 4.378  | ENSG00000116133 | DHCR24     | 24-dehydrocholesterol reductase                                       | Cytoplasm           |
| 2.172  | ENSG00000162496 | DHRS3      | dehydrogenase/reductase 3                                             | Cytoplasm           |
| 2.86   | ENSG00000151240 | DIP2C      | disco interacting protein 2 homolog C                                 | Other               |
| 3.261  | ENSG00000151208 | DLG5       | discs large MAGUK scaffold protein 5                                  | Plasma Membrane     |
| 3.152  | ENSG00000185842 | DNAH14     | dynein axonemal heavy chain 14                                        | Other               |
| 3.764  | ENSG00000197959 | DNM3       | dynamamin 3                                                           | Cytoplasm           |
| 3.523  | ENSG00000150760 | DOCK1      | dedicator of cytokinesis 1                                            | Cytoplasm           |
| 4.07   | ENSG00000130158 | DOCK6      | dedicator of cytokinesis 6                                            | Cytoplasm           |
| 11.392 | ENSG00000245750 | DRAIC      | downregulated RNA in cancer, inhibitor of cell invasion and migration | Other               |
| 8.523  | ENSG00000046604 | DSG2       | desmoglein 2                                                          | Plasma Membrane     |
| 8.644  | ENSG00000096696 | DSP        | desmoplakin                                                           | Plasma Membrane     |
| 2.988  | ENSG00000125868 | DSTN       | destrin, actin depolymerizing factor                                  | Cytoplasm           |
| 6.112  | ENSG00000134769 | DTNA       | dystrobrevin alpha                                                    | Plasma Membrane     |
| 4.268  | ENSG00000243701 | DUBR       | DPPA2 upstream binding RNA                                            | Other               |
| 9.065  | ENSG00000078401 | EDN1       | endothelin 1                                                          | Extracellular Space |
| 7.737  | ENSG00000127129 | EDN2       | endothelin 2                                                          | Extracellular Space |
| 12.123 | ENSG00000101210 | EEF1A2     | eukaryotic translation elongation factor 1 alpha 2                    | Cytoplasm           |
| 10.349 | ENSG00000169242 | EFNA1      | ephrin A1                                                             | Plasma Membrane     |
| 2.625  | ENSG00000138798 | EGF        | epidermal growth factor                                               | Extracellular Space |
| 11.923 | ENSG00000146648 | EGFR       | epidermal growth factor receptor                                      | Plasma Membrane     |
| 4.291  | ENSG00000129521 | EGLN3      | egl-9 family hypoxia inducible factor 3                               | Cytoplasm           |
| 4.457  | ENSG00000120738 | EGR1       | early growth response 1                                               | Nucleus             |
| 3.186  | ENSG00000013016 | EHD3       | EH domain containing 3                                                | Cytoplasm           |
| 12.764 | ENSG00000135373 | EHF        | ETS homologous factor                                                 | Nucleus             |
| 1.607  | ENSG00000143486 | EIF2D      | eukaryotic translation initiation factor 2D                           | Cytoplasm           |
| 2.035  | ENSG00000125977 | EIF2S2     | eukaryotic translation initiation factor 2 subunit beta               | Cytoplasm           |
| 5.975  | ENSG00000163435 | ELF3       | E74 like ETS transcription factor 3                                   | Nucleus             |
| 6.9    | ENSG00000234678 | ELF3-AS1   | ELF3 antisense RNA 1                                                  | Other               |
| 8.887  | ENSG00000135374 | ELF5       | E74 like ETS transcription factor 5                                   | Other               |
| 24.62  | ENSG00000066629 | EML1       | EMAP like 1                                                           | Cytoplasm           |
| 10.316 | ENSG00000213853 | EMP2       | epithelial membrane protein 2                                         | Plasma Membrane     |
| 13.715 | ENSG00000154380 | ENAH       | ENAH actin regulator                                                  | Plasma Membrane     |
| 5.765  | ENSG00000088367 | EPB41L1    | erythrocyte membrane protein band 4.1 like 1                          | Plasma Membrane     |
| 14.385 | ENSG00000119888 | EPCAM      | epithelial cell adhesion molecule                                     | Plasma Membrane     |
| 7.332  | ENSG00000080224 | EPHA6      | EPH receptor A6                                                       | Plasma Membrane     |
| 4.681  | ENSG00000196411 | EPHB4      | EPH receptor B4                                                       | Plasma Membrane     |
| 6.421  | ENSG00000049283 | EPN3       | epsin 3                                                               | Cytoplasm           |
| 7.108  | ENSG00000177106 | EPS8L2     | EPS8 like 2                                                           | Cytoplasm           |
| 6.506  | ENSG00000065361 | ERBB3      | erb-b2 receptor tyrosine kinase 3                                     | Plasma Membrane     |
| 8.201  | ENSG00000116285 | ERRF1      | ERBB receptor feedback inhibitor 1                                    | Cytoplasm           |
| 8.167  | ENSG00000226887 | ERVMER34-1 | endogenous retrovirus group MER34 member 1, envelope                  | Other               |
| 2.858  | ENSG00000149564 | ESAM       | endothelial cell adhesion molecule                                    | Plasma Membrane     |
| 12.333 | ENSG00000104413 | ESRP1      | epithelial splicing regulatory protein 1                              | Nucleus             |
| 10.094 | ENSG00000103067 | ESRP2      | epithelial splicing regulatory protein 2                              | Nucleus             |
| 7.468  | ENSG00000196482 | ESRRG      | estrogen related receptor gamma                                       | Nucleus             |
| 4.046  | ENSG00000072840 | EVC        | EvC ciliary complex subunit 1                                         | Cytoplasm           |
| 4.217  | ENSG00000110723 | EXPH5      | exophilin 5                                                           | Cytoplasm           |
| 2.575  | ENSG00000092820 | EZR        | ezrin                                                                 | Plasma Membrane     |
| 1.446  | ENSG00000158769 | F11R       | F11 receptor                                                          | Plasma Membrane     |
| 5.378  | ENSG00000127533 | F2RL3      | F2R like thrombin or trypsin receptor 3                               | Plasma Membrane     |
| 8.184  | ENSG00000103089 | FA2H       | fatty acid 2-hydroxylase                                              | Cytoplasm           |
| 3.802  | ENSG00000169122 | FAM110B    | family with sequence similarity 110 member B                          | Cytoplasm           |
| 9.773  | ENSG00000109794 | FAM149A    | family with sequence similarity 149 member A                          | Other               |
| 9.295  | ENSG00000130054 | FAM155B    | family with sequence similarity 155 member B                          | Plasma Membrane     |
| 4.84   | ENSG00000148468 | FAM171A1   | family with sequence similarity 171 member A1                         | Cytoplasm           |
| 5.524  | ENSG00000185442 | FAM174B    | family with sequence similarity 174 member B                          | Other               |
| 3.058  | ENSG00000185112 | FAM43A     | family with sequence similarity 43 member A                           | Other               |
| 4.338  | ENSG00000101447 | FAM83D     | family with sequence similarity 83 member D                           | Cytoplasm           |
| 4.84   | ENSG00000133477 | FAM83F     | family with sequence similarity 83 member F                           | Other               |
| 4.03   | ENSG00000188522 | FAM83G     | family with sequence similarity 83 member G                           | Other               |
| 3.583  | ENSG00000180921 | FAM83H     | family with sequence similarity 83 member H                           | Other               |
| 9.412  | ENSG00000203499 | FAM83H-AS1 | FAM83H antisense RNA 1 (head to head)                                 | Other               |
| 3.13   | ENSG00000168672 | FAM84B     | family with sequence similarity 84 member B                           | Plasma Membrane     |
| 8.845  | ENSG00000180178 | FAR2P1     | fatty acyl-CoA reductase 2 pseudogene 1                               | Other               |
| 9.18   | ENSG00000178162 | FAR2P2     | fatty acyl-CoA reductase 2 pseudogene 2                               | Other               |
| 7.394  | ENSG00000240253 | FAR2P3     | fatty acyl-CoA reductase 2 pseudogene 3                               | Other               |
| 8.417  | ENSG00000152767 | FARP1      | FERM, ARH/RhoGEF and pleckstrin domain protein 1                      | Plasma Membrane     |
| 3.339  | ENSG00000169710 | FASN       | fatty acid synthase                                                   | Cytoplasm           |
| 4.425  | ENSG00000083857 | FAT1       | FAT atypical cadherin 1                                               | Plasma Membrane     |
| 10.012 | ENSG00000162458 | FBLIM1     | filamin binding LIM protein 1                                         | Plasma Membrane     |
| 7.586  | ENSG00000183580 | FBXL7      | F-box and leucine rich repeat protein 7                               | Cytoplasm           |
| 22.966 | ENSG00000088340 | FER1L4     | fer-1 like family member 4 (pseudogene)                               | Other               |
| 9.836  | ENSG00000102302 | FGD1       | FYVE, RhoGEF and PH domain containing 1                               | Cytoplasm           |
| 4.232  | ENSG00000138685 | FGF2       | fibroblast growth factor 2                                            | Extracellular Space |
| 2.112  | ENSG00000145216 | FIP1L1     | factor interacting with PAPOLA and CPSF1                              | Nucleus             |
| 11.232 | ENSG00000141756 | FKBP10     | FKBP prolyl isomerase 10                                              | Cytoplasm           |
| 4.945  | ENSG00000254531 | FUJ20021   | uncharacterized LOC90024                                              | Other               |
| 3.58   | ENSG00000136068 | FLNB       | filamin B                                                             | Cytoplasm           |
| 1.597  | ENSG00000131781 | FMO5       | flavin containing monooxygenase 5                                     | Cytoplasm           |
| 3.827  | ENSG00000167363 | FN3K       | fructosamine 3 kinase                                                 | Cytoplasm           |
| 4.565  | ENSG00000137942 | FNBP1L     | formin binding protein 1 like                                         | Cytoplasm           |
| 12.015 | ENSG00000086205 | FOLH1      | folate hydrolase 1                                                    | Plasma Membrane     |
| 4.168  | ENSG00000125740 | FOSB       | FosB proto-oncogene, AP-1 transcription factor subunit                | Nucleus             |
| 14.267 | ENSG00000129514 | FOXA1      | forkhead box A1                                                       | Nucleus             |
| 7.339  | ENSG00000111816 | FRK        | fyn related Src family tyrosine kinase                                | Nucleus             |
| 3.595  | ENSG00000114541 | FRMD4B     | FERM domain containing 4B                                             | Cytoplasm           |
| 4.567  | ENSG00000150667 | FSIP1      | fibrous sheath interacting protein 1                                  | Other               |
| 2.566  | ENSG00000163430 | FSTL1      | folliculin like 1                                                     | Extracellular Space |
| 10.035 | ENSG00000053108 | FSTL4      | folliculin like 4                                                     | Cytoplasm           |
| 4.009  | ENSG00000174951 | FUT1       | fucosyltransferase 1 (H blood group)                                  | Cytoplasm           |

|        |                 |             |                                                                 |                     |
|--------|-----------------|-------------|-----------------------------------------------------------------|---------------------|
| 9.065  | ENSG00000089356 | FXYP3       | FXYP domain containing ion transport regulator 3                | Plasma Membrane     |
| 24.826 | ENSG00000166206 | GABRB3      | gamma-aminobutyric acid type A receptor beta3 subunit           | Plasma Membrane     |
| 6.485  | ENSG00000102287 | GABRE       | gamma-aminobutyric acid type A receptor epsilon subunit         | Plasma Membrane     |
| 23.925 | ENSG00000110328 | GALNT18     | polypeptide N-acetylgalactosaminyltransferase 18                | Cytoplasm           |
| 11.669 | ENSG00000141441 | GAREM1      | GRB2 associated regulator of MAPK1 subtype 1                    | Nucleus             |
| 2.545  | ENSG00000185340 | GAS2L1      | growth arrest specific 2 like 1                                 | Cytoplasm           |
| 9.997  | ENSG00000130513 | GDF15       | growth differentiation factor 15                                | Extracellular Space |
| 1.53   | ENSG00000203879 | GD1I        | GDP dissociation inhibitor 1                                    | Cytoplasm           |
| 2.806  | ENSG00000198380 | GFPT1       | glutamine-fructose-6-phosphate transaminase 1                   | Cytoplasm           |
| 6.013  | ENSG00000166840 | GLYATL1     | glycine-N-acyltransferase like 1                                | Other               |
| 4.109  | ENSG00000112312 | GMNN        | geminin DNA replication inhibitor                               | Nucleus             |
| 7.724  | ENSG00000156049 | GNA14       | G protein subunit alpha 14                                      | Plasma Membrane     |
| 3.563  | ENSG00000127955 | GNAI1       | G protein subunit alpha i1                                      | Plasma Membrane     |
| 10.777 | ENSG00000172380 | GNG12       | G protein subunit gamma 12                                      | Plasma Membrane     |
| 1.789  | ENSG00000167110 | GOLGA2      | golgin A2                                                       | Cytoplasm           |
| 2.193  | ENSG00000173905 | GOLIM4      | golgi integral membrane protein 4                               | Cytoplasm           |
| 3.874  | ENSG00000135052 | GOLM1       | golgi membrane protein 1                                        | Cytoplasm           |
| 3.832  | ENSG00000088053 | GP6         | glycoprotein VI platelet                                        | Plasma Membrane     |
| 2.931  | ENSG00000169704 | GP9         | glycoprotein IX platelet                                        | Plasma Membrane     |
| 7.435  | ENSG00000063660 | GPC1        | glypican 1                                                      | Plasma Membrane     |
| 6.612  | ENSG00000179399 | GPC5        | glypican 5                                                      | Plasma Membrane     |
| 6.591  | ENSG00000183098 | GPC6        | glypican 6                                                      | Plasma Membrane     |
| 9.163  | ENSG00000166073 | GPR176      | G protein-coupled receptor 176                                  | Plasma Membrane     |
| 7.001  | ENSG00000170412 | GPRC5C      | G protein-coupled receptor class C group 5 member C             | Plasma Membrane     |
| 4.661  | ENSG00000166123 | GPT2        | glutamic-pyruvic transaminase 2                                 | Cytoplasm           |
| 9.368  | ENSG00000141738 | GRB7        | growth factor receptor bound protein 7                          | Plasma Membrane     |
| 7.593  | ENSG00000166923 | GREM1       | gremlin 1, DAN family BMP antagonist                            | Extracellular Space |
| 4.993  | ENSG00000134317 | GRHL1       | grainyhead like transcription factor 1                          | Nucleus             |
| 12.231 | ENSG00000083307 | GRHL2       | grainyhead like transcription factor 2                          | Nucleus             |
| 23.411 | ENSG00000155974 | GRIP1       | glutamate receptor interacting protein 1                        | Plasma Membrane     |
| 3.356  | ENSG00000254332 | GSI_44D201  | chondroitin sulfate proteoglycan 4 pseudogene 3 Y-linked        | Other               |
| 1.181  | ENSG00000131149 | GSE1        | Gse1 coiled-coil protein                                        | Extracellular Space |
| 7.171  | ENSG00000006704 | GTF2IRD1    | GTF2I repeat domain containing 1                                | Nucleus             |
| 2.854  | ENSG00000155115 | GTF3C6      | general transcription factor IIIC subunit 6                     | Nucleus             |
| 2.517  | ENSG00000172432 | GTPBP2      | GTP binding protein 2                                           | Extracellular Space |
| 3.509  | ENSG00000164116 | GUCY1A1     | guanylate cyclase 1 soluble subunit alpha 1                     | Cytoplasm           |
| 3.811  | ENSG00000061918 | GUCY1B1     | guanylate cyclase 1 soluble subunit beta 1                      | Cytoplasm           |
| 9.862  | ENSG00000144366 | GULP1       | GULP PTB domain containing engulfment adaptor 1                 | Cytoplasm           |
| 5.818  | ENSG00000114315 | HES1        | hes family bHLH transcription factor 1                          | Nucleus             |
| 4.31   | ENSG00000167861 | HID1        | HID1 domain containing                                          | Plasma Membrane     |
| 23.347 | ENSG00000187475 | HIST1H1T    | histone cluster 1 H1 family member t                            | Nucleus             |
| 1.894  | ENSG00000158373 | HIST1H2BD   | histone cluster 1 H2B family member d                           | Nucleus             |
| 1.772  | ENSG00000064961 | HMG20B      | high mobility group 20B                                         | Nucleus             |
| 13.136 | ENSG00000134240 | HMGCS2      | 3-hydroxy-3-methylglutaryl-CoA synthase 2                       | Cytoplasm           |
| 4.857  | ENSG00000103942 | HOMER2      | homer scaffold protein 2                                        | Plasma Membrane     |
| 3.299  | ENSG00000134709 | HOOK1       | hook microtubule tethering protein 1                            | Cytoplasm           |
| 2.037  | ENSG00000095066 | HOOK2       | hook microtubule tethering protein 2                            | Cytoplasm           |
| 9.871  | ENSG00000253187 | HOXA10-AS   | HOXA10 antisense RNA                                            | Other               |
| 11.429 | ENSG00000106031 | HOXA13      | homeobox A13                                                    | Nucleus             |
| 11.875 | ENSG00000159184 | HOXB13      | homeobox B13                                                    | Nucleus             |
| 24.689 | ENSG00000105707 | HPN         | hepsin                                                          | Plasma Membrane     |
| 1.666  | ENSG00000133835 | HSD17B4     | hydroxysteroid 17-beta dehydrogenase 4                          | Cytoplasm           |
| 1.851  | ENSG00000080824 | HSP90AA1    | heat shock protein 90 alpha family class A member 1             | Cytoplasm           |
| 2.415  | ENSG00000096384 | HSP90AB1    | heat shock protein 90 alpha family class B member 1             | Cytoplasm           |
| 7.045  | ENSG00000205940 | HSP90AB2P   | heat shock protein 90 alpha family class B member 2, pseudogene | Cytoplasm           |
| 4.329  | ENSG00000183199 | HSP90AB3P   | heat shock protein 90 alpha family class B member 3, pseudogene | Cytoplasm           |
| 1.206  | ENSG00000166598 | HSP90B1     | heat shock protein 90 beta family member 1                      | Cytoplasm           |
| 8.907  | ENSG00000165868 | HSPA12A     | heat shock protein family A (Hsp70) member 12A                  | Cytoplasm           |
| 1.584  | ENSG00000113013 | HSPA9       | heat shock protein family A (Hsp70) member 9                    | Cytoplasm           |
| 4.374  | ENSG00000106211 | HSPB1       | heat shock protein family B (small) member 1                    | Cytoplasm           |
| 2.511  | ENSG00000144381 | HSPD1       | heat shock protein family D (Hsp60) member 1                    | Cytoplasm           |
| 3.098  | ENSG00000003147 | ICA1        | islet cell autoantigen 1                                        | Cytoplasm           |
| 2.462  | ENSG00000006652 | IFRD1       | interferon related developmental regulator 1                    | Nucleus             |
| 2.27   | ENSG00000114446 | IFTS7       | intraflagellar transport 57                                     | Cytoplasm           |
| 2.134  | ENSG00000140443 | IGF1R       | insulin like growth factor 1 receptor                           | Plasma Membrane     |
| 2.748  | ENSG00000115457 | IGFBP2      | insulin like growth factor binding protein 2                    | Extracellular Space |
| 9.246  | ENSG00000136695 | IL36RN      | interleukin 36 receptor antagonist                              | Extracellular Space |
| 3.012  | ENSG00000203485 | INF2        | inverted formin, FH2 and WH2 domain containing                  | Cytoplasm           |
| 2.775  | ENSG00000168395 | INGS        | inhibitor of growth family member 5                             | Nucleus             |
| 4.705  | ENSG00000224078 | IPW         | imprinted in Prader-Willi syndrome                              | Other               |
| 3.031  | ENSG00000169047 | IRS1        | insulin receptor substrate 1                                    | Cytoplasm           |
| 9.012  | ENSG00000177508 | IRX3        | iroquois homeobox 3                                             | Nucleus             |
| 3.327  | ENSG00000164171 | ITGA2       | integrin subunit alpha 2                                        | Plasma Membrane     |
| 2.647  | ENSG00000005961 | ITGA2B      | integrin subunit alpha 2b                                       | Plasma Membrane     |
| 3.219  | ENSG00000138448 | ITGAV       | integrin subunit alpha V                                        | Plasma Membrane     |
| 2.958  | ENSG00000259207 | ITGB3       | integrin subunit beta 3                                         | Plasma Membrane     |
| 3.521  | ENSG00000082781 | ITGB5       | integrin subunit beta 5                                         | Plasma Membrane     |
| 3.283  | ENSG00000206053 | JPT2        | Jupiter microtubule associated homolog 2                        | Cytoplasm           |
| 6.015  | ENSG00000177606 | JUN         | Jun proto-oncogene, AP-1 transcription factor subunit           | Nucleus             |
| 3.71   | ENSG00000173801 | JUP         | junction plakoglobin                                            | Plasma Membrane     |
| 5.254  | ENSG00000160145 | KALRN       | kalirin RhoGEF kinase                                           | Cytoplasm           |
| 4.544  | ENSG00000189337 | KAZN        | kazrin, periactin interacting protein                           | Plasma Membrane     |
| 7.613  | ENSG00000254024 | KB_1562D121 | chondroitin sulfate proteoglycan 4 pseudogene 3 Y-linked        | Other               |
| 3.931  | ENSG00000171385 | KCNQ3       | potassium voltage-gated channel subfamily D member 3            | Plasma Membrane     |
| 3.333  | ENSG00000099337 | KCNK6       | potassium two pore domain channel subfamily K member 6          | Plasma Membrane     |
| 6.797  | ENSG00000080709 | KCNN2       | potassium calcium-activated channel subfamily N member 2        | Plasma Membrane     |
| 2.122  | ENSG00000269821 | KCNQ1OT1    | KCNQ1 opposite strand/antisense transcript 1                    | Other               |
| 1.464  | ENSG00000110906 | KCTD10      | potassium channel tetramerization domain containing 10          | Nucleus             |
| 8.359  | ENSG00000164542 | KIAA0895    | KIAA0895                                                        | Other               |
| 3.888  | ENSG00000109265 | KIAA1211    | KIAA1211                                                        | Other               |
| 12.474 | ENSG00000120549 | KIAA1217    | KIAA1217                                                        | Cytoplasm           |



|        |                 |              |                                                                           |                     |
|--------|-----------------|--------------|---------------------------------------------------------------------------|---------------------|
| 4.71   | ENSG00000116299 | KIAA1324     | KIAA1324                                                                  | Plasma Membrane     |
| 4.113  | ENSG00000162522 | KIAA1522     | KIAA1522                                                                  | Other               |
| 23.978 | ENSG00000136883 | KIF12        | kinesin family member 12                                                  | Cytoplasm           |
| 2.647  | ENSG00000129250 | KIF1C        | kinesin family member 1C                                                  | Cytoplasm           |
| 2.004  | ENSG00000084731 | KIF3C        | kinesin family member 3C                                                  | Cytoplasm           |
| 5.81   | ENSG00000168280 | KIF5C        | kinesin family member 5C                                                  | Cytoplasm           |
| 3.484  | ENSG00000140859 | KIF3C        | kinesin family member C3                                                  | Cytoplasm           |
| 3.943  | ENSG00000174996 | KLK2         | kinesin light chain 2                                                     | Cytoplasm           |
| 2.376  | ENSG00000119138 | KLF9         | Kruppel like factor 9                                                     | Nucleus             |
| 13.469 | ENSG00000167751 | KLK2         | kallikrein related peptidase 2                                            | Extracellular Space |
| 14.516 | ENSG00000142515 | KLK3         | kallikrein related peptidase 3                                            | Extracellular Space |
| 11.857 | ENSG00000167749 | KLK4         | kallikrein related peptidase 4                                            | Extracellular Space |
| 2.162  | ENSG00000103550 | KNOP1        | lysine rich nucleolar protein 1                                           | Other               |
| 7.618  | ENSG00000111057 | KRT18        | keratin 18                                                                | Cytoplasm           |
| 8.401  | ENSG00000171345 | KRT19        | keratin 19                                                                | Cytoplasm           |
| 9.532  | ENSG00000170421 | KRT8         | keratin 8                                                                 | Cytoplasm           |
| 9.381  | ENSG00000167767 | KRT80        | keratin 80                                                                | Cytoplasm           |
| 4.974  | ENSG00000250148 | KRT8P31      | keratin 8 pseudogene 31                                                   | Other               |
| 12.153 | ENSG00000159166 | LAD1         | ladinin 1                                                                 | Extracellular Space |
| 4.434  | ENSG00000130702 | LAMA5        | laminin subunit alpha 5                                                   | Extracellular Space |
| 8.873  | ENSG00000091136 | LAMB1        | laminin subunit beta 1                                                    | Extracellular Space |
| 4.586  | ENSG00000135862 | LAMC1        | laminin subunit gamma 1                                                   | Extracellular Space |
| 2.592  | ENSG00000147036 | LANCL3       | LanC like 3                                                               | Other               |
| 3.803  | ENSG00000119862 | LGALS1       | galectin like                                                             | Other               |
| 2.301  | ENSG00000100600 | LGMM         | legumain                                                                  | Cytoplasm           |
| 10.427 | ENSG00000113594 | LIFR         | LIF receptor alpha                                                        | Plasma Membrane     |
| 8.655  | ENSG00000064042 | LIMCH1       | LIM and calponin homology domains 1                                       | Cytoplasm           |
| 2.825  | ENSG00000169756 | LIMS1        | LIM zinc finger domain containing 1                                       | Plasma Membrane     |
| 6.755  | ENSG00000227036 | LINC00511    | long intergenic non-protein coding RNA 511                                | Other               |
| 8.071  | ENSG00000224259 | LINC01133    | long intergenic non-protein coding RNA 1133                               | Other               |
| 23.74  | ENSG00000229981 | LINC01435    | long intergenic non-protein coding RNA 1435                               | Other               |
| 4.505  | ENSG00000163898 | LIPH         | lipase H                                                                  | Extracellular Space |
| 3.825  | ENSG00000160789 | LMNA         | lamin A/C                                                                 | Nucleus             |
| 2.887  | ENSG00000136153 | LMO7         | LIM domain 7                                                              | Cytoplasm           |
| 2.191  | ENSG00000139517 | LNX2         | ligand of numb-protein X 2                                                | Other               |
| 4.054  | ENSG00000261253 | LOC100287036 | uncharacterized LOC100287036                                              | Other               |
| 4.622  | ENSG00000235513 | LOC100506544 | uncharacterized LOC100506544                                              | Other               |
| 3.264  | ENSG00000245552 | LOC101929295 | uncharacterized LOC101929295                                              | Other               |
| 8.931  | ENSG00000171517 | LPAR3        | lysophosphatidic acid receptor 3                                          | Plasma Membrane     |
| 1.8    | ENSG00000198589 | LRBA         | LPS responsive beige-like anchor protein                                  | Cytoplasm           |
| 11.197 | ENSG00000139263 | LRIG3        | leucine rich repeats and immunoglobulin like domains 3                    | Extracellular Space |
| 6.853  | ENSG00000120256 | LRP11        | LDL receptor related protein 11                                           | Other               |
| 4.626  | ENSG00000147650 | LRP12        | LDL receptor related protein 12                                           | Plasma Membrane     |
| 6.053  | ENSG00000162337 | LRP5         | LDL receptor related protein 5                                            | Plasma Membrane     |
| 9.575  | ENSG00000114248 | LRRC31       | leucine rich repeat containing 31                                         | Other               |
| 23.954 | ENSG00000171017 | LRRC8E       | leucine rich repeat containing 8 VRAC subunit E                           | Plasma Membrane     |
| 23.369 | ENSG00000131951 | LRRC9        | leucine rich repeat containing 9                                          | Other               |
| 4.474  | ENSG00000184154 | LRTOMT       | leucine rich transmembrane and O-methyltransferase domain containing      | Plasma Membrane     |
| 4.381  | ENSG00000181016 | LSMEM1       | leucine rich single-pass membrane protein 1                               | Cytoplasm           |
| 3.814  | ENSG00000105699 | LSR          | lipolysis stimulated lipoprotein receptor                                 | Nucleus             |
| 3.623  | ENSG00000049323 | LTBP1        | latent transforming growth factor beta binding protein 1                  | Extracellular Space |
| 4.44   | ENSG00000153714 | LURAP1L      | leucine rich adaptor protein 1 like                                       | Other               |
| 9.55   | ENSG00000163155 | LYSMD1       | LysM domain containing 1                                                  | Nucleus             |
| 3.118  | ENSG00000102316 | MAGE2        | MAGE family member D2                                                     | Plasma Membrane     |
| 4.823  | ENSG00000187391 | MAGI2        | membrane associated guanylate kinase, WW and PDZ domain containing 2      | Plasma Membrane     |
| 3.383  | ENSG00000081026 | MAGI3        | membrane associated guanylate kinase, WW and PDZ domain containing 3      | Cytoplasm           |
| 12.516 | ENSG00000147676 | MAL2         | mal, T cell differentiation protein 2 (gene/pseudogene)                   | Plasma Membrane     |
| 2.265  | ENSG00000251562 | MALAT1       | metastasis associated lung adenocarcinoma transcript 1                    | Nucleus             |
| 5.357  | ENSG00000189221 | MAOA         | monoamine oxidase A                                                       | Cytoplasm           |
| 2.867  | ENSG00000166963 | MAP1A        | microtubule associated protein 1A                                         | Cytoplasm           |
| 5.156  | ENSG00000131711 | MAP1B        | microtubule associated protein 1B                                         | Cytoplasm           |
| 5.376  | ENSG00000078018 | MAP2         | microtubule associated protein 2                                          | Plasma Membrane     |
| 1.567  | ENSG00000197442 | MAP3K5       | mitogen-activated protein kinase kinase kinase 5                          | Cytoplasm           |
| 5.014  | ENSG00000135525 | MAP7         | microtubule associated protein 7                                          | Cytoplasm           |
| 9.493  | ENSG00000141639 | MAPK4        | mitogen-activated protein kinase 4                                        | Cytoplasm           |
| 2.268  | ENSG00000069956 | MAPK6        | mitogen-activated protein kinase 6                                        | Cytoplasm           |
| 5.662  | ENSG0000008735  | MAPK8IP2     | mitogen-activated protein kinase 8 interacting protein 2                  | Cytoplasm           |
| 9.49   | ENSG00000116141 | MARK1        | microtubule affinity regulating kinase 1                                  | Cytoplasm           |
| 5.418  | ENSG00000152939 | MARVELD2     | MARVEL domain containing 2                                                | Plasma Membrane     |
| 4.365  | ENSG00000069020 | MAST4        | microtubule associated serine/threonine kinase family member 4            | Other               |
| 24.037 | ENSG00000198125 | MB           | myoglobin                                                                 | Cytoplasm           |
| 2.338  | ENSG00000131844 | MCC2         | methylcrotonoyl-CoA carboxylase 2                                         | Cytoplasm           |
| 3.013  | ENSG00000126217 | MCF2L        | MCF.2 cell line derived transforming sequence like                        | Cytoplasm           |
| 2.447  | ENSG00000050393 | MCUR1        | mitochondrial calcium uniporter regulator 1                               | Cytoplasm           |
| 7.107  | ENSG00000110492 | MDK          | midkine                                                                   | Extracellular Space |
| 3.103  | ENSG00000111554 | MDM1         | Mdm1 nuclear protein                                                      | Cytoplasm           |
| 1.614  | ENSG00000124733 | MEA1         | male-enhanced antigen 1                                                   | Cytoplasm           |
| 3.526  | ENSG00000143995 | MEIS1        | Meis homeobox 1                                                           | Nucleus             |
| 2.421  | ENSG00000198948 | MFAP3L       | microfibril associated protein 3 like                                     | Other               |
| 2.184  | ENSG00000243156 | MICAL3       | microtubule associated monoxygenase, calponin and LIM domain containing 3 | Cytoplasm           |
| 3.896  | ENSG00000164877 | MICALL2      | MICAL like 2                                                              | Cytoplasm           |
| 4.683  | ENSG00000027001 | MIPEP        | mitochondrial intermediate peptidase                                      | Cytoplasm           |
| 3.076  | ENSG00000227195 | MIR663AHG    | MIR663A host gene                                                         | Other               |
| 11.542 | ENSG00000115648 | MLPH         | melanophilin                                                              | Cytoplasm           |
| 7.584  | ENSG00000009950 | MLXIPL       | MLX interacting protein like                                              | Nucleus             |
| 3.464  | ENSG00000138722 | MMRN1        | multimerin 1                                                              | Extracellular Space |
| 3.121  | ENSG00000142961 | MOB3C        | MOB kinase activator 3C                                                   | Other               |
| 3.512  | ENSG00000133131 | MORC4        | MORC family CW-type zinc finger 4                                         | Nucleus             |
| 6.422  | ENSG00000107186 | MPDZ         | multiple PDZ domain crumbs cell polarity complex component                | Plasma Membrane     |
| 2.994  | ENSG00000117400 | MPL          | MPL proto-oncogene, thrombopoietin receptor                               | Plasma Membrane     |
| 2.105  | ENSG00000072415 | MPP5         | membrane palmitoylated protein 5                                          | Plasma Membrane     |

|        |                 |          |                                                                                                     |                     |
|--------|-----------------|----------|-----------------------------------------------------------------------------------------------------|---------------------|
| 1.943  | ENSG00000066697 | MSANTD3  | Myb/SANT DNA binding domain containing 3                                                            | Other               |
| 8.093  | ENSG00000135097 | MSI1     | musashi RNA binding protein 1                                                                       | Cytoplasm           |
| 8.484  | ENSG00000210140 | MT-TC    | tRNA                                                                                                | Cytoplasm           |
| 8.658  | ENSG00000210164 | MT-TG    | tRNA                                                                                                | Cytoplasm           |
| 4.334  | ENSG00000210176 | MT-TH    | tRNA                                                                                                | Cytoplasm           |
| 5.07   | ENSG00000209082 | MT-TL1   | tRNA                                                                                                | Cytoplasm           |
| 7.908  | ENSG00000210174 | MT-TR    | tRNA                                                                                                | Cytoplasm           |
| 4.784  | ENSG00000210184 | MT-TS2   | tRNA                                                                                                | Cytoplasm           |
| 5.036  | ENSG00000210077 | MT-TV    | tRNA                                                                                                | Cytoplasm           |
| 5.184  | ENSG00000168502 | MTCL1    | microtubule crosslinking factor 1                                                                   | Cytoplasm           |
| 3.217  | ENSG00000132613 | MTSS2    | MTSS I-BAR domain containing 2                                                                      | Plasma Membrane     |
| 5.121  | ENSG00000129422 | MTUS1    | microtubule associated scaffold protein 1                                                           | Extracellular Space |
| 4.745  | ENSG00000185499 | MUC1     | mucin 1, cell surface associated                                                                    | Plasma Membrane     |
| 4.102  | ENSG00000120279 | MYCT1    | MYC target 1                                                                                        | Nucleus             |
| 4.381  | ENSG00000133026 | MYH10    | myosin heavy chain 10                                                                               | Cytoplasm           |
| 7.653  | ENSG00000105357 | MYH14    | myosin heavy chain 14                                                                               | Extracellular Space |
| 1.478  | ENSG00000092841 | MYL6     | myosin light chain 6                                                                                | Cytoplasm           |
| 3.262  | ENSG00000065534 | MYLK     | myosin light chain kinase                                                                           | Cytoplasm           |
| 3.806  | ENSG00000145555 | MYO10    | myosin X                                                                                            | Cytoplasm           |
| 10.732 | ENSG00000128641 | MYO1B    | myosin IB                                                                                           | Cytoplasm           |
| 2.509  | ENSG00000197879 | MYO1C    | myosin IC                                                                                           | Cytoplasm           |
| 2.956  | ENSG00000176658 | MYO1D    | myosin ID                                                                                           | Cytoplasm           |
| 13.334 | ENSG00000167306 | MYO5B    | myosin VB                                                                                           | Cytoplasm           |
| 4.84   | ENSG00000128833 | MYO5C    | myosin VC                                                                                           | Cytoplasm           |
| 5.009  | ENSG00000196586 | MYO6     | myosin VI                                                                                           | Cytoplasm           |
| 5.636  | ENSG00000177694 | NAALADL2 | N-acetylated alpha-linked acidic dipeptidase like 2                                                 | Nucleus             |
| 3.564  | ENSG00000172915 | NBEA     | neurobeachin                                                                                        | Cytoplasm           |
| 10.653 | ENSG00000258590 | NBEAP1   | neurobeachin pseudogene 1                                                                           | Other               |
| 2.015  | ENSG00000071051 | NCK2     | NCK adaptor protein 2                                                                               | Cytoplasm           |
| 3.795  | ENSG00000061676 | NCKAP1   | NCK associated protein 1                                                                            | Plasma Membrane     |
| 2.143  | ENSG00000104419 | NDRG1    | N-myc downstream regulated 1                                                                        | Nucleus             |
| 2.048  | ENSG00000245532 | NEAT1    | nuclear paraspeckle assembly transcript 1                                                           | Other               |
| 6.608  | ENSG00000078114 | NEBL     | nebulin                                                                                             | Plasma Membrane     |
| 3.256  | ENSG00000130202 | NECTIN2  | nectin cell adhesion molecule 2                                                                     | Plasma Membrane     |
| 23.954 | ENSG00000143217 | NECTIN4  | nectin cell adhesion molecule 4                                                                     | Plasma Membrane     |
| 3.339  | ENSG00000049759 | NEDD4L   | neural precursor cell expressed, developmentally down-regulated 4-like, E3 ubiquitin protein ligase | Cytoplasm           |
| 4.737  | ENSG00000173848 | NET1     | neuroepithelial cell transforming 1                                                                 | Nucleus             |
| 4.74   | ENSG00000214357 | NEURL1B  | neuronal E3 ubiquitin protein ligase 1B                                                             | Other               |
| 5.119  | ENSG00000162614 | NEXN     | nexilin F-actin binding protein                                                                     | Plasma Membrane     |
| 3.884  | ENSG00000147862 | NFIB     | nuclear factor I B                                                                                  | Nucleus             |
| 1.683  | ENSG00000100906 | NFKBIA   | NFKB inhibitor alpha                                                                                | Cytoplasm           |
| 1.929  | ENSG00000196865 | NHLRC2   | NHL repeat containing 2                                                                             | Cytoplasm           |
| 2.163  | ENSG00000170113 | NIPA1    | NIPA magnesium transporter 1                                                                        | Plasma Membrane     |
| 13.459 | ENSG00000167034 | NKX3-1   | NK3 homeobox 1                                                                                      | Nucleus             |
| 25.244 | ENSG00000169760 | NLGN1    | neuroligin 1                                                                                        | Plasma Membrane     |
| 23.745 | ENSG00000163072 | NOSTRIN  | nitric oxide synthase trafficking                                                                   | Cytoplasm           |
| 6.887  | ENSG00000170485 | NPAS2    | neuronal PAS domain protein 2                                                                       | Nucleus             |
| 9.835  | ENSG00000168743 | NPNT     | nephronectin                                                                                        | Plasma Membrane     |
| 12.017 | ENSG00000185551 | NRP2     | nuclear receptor subfamily 2 group F member 2                                                       | Nucleus             |
| 4.962  | ENSG00000099250 | NRP1     | neuropilin 1                                                                                        | Plasma Membrane     |
| 1.379  | ENSG00000126653 | NSRP1    | nuclear speckle splicing regulatory protein 1                                                       | Nucleus             |
| 2.338  | ENSG00000069275 | NUCKS1   | nuclear casein kinase and cyclin dependent kinase substrate 1                                       | Nucleus             |
| 7.897  | ENSG00000176046 | NUPR1    | nuclear protein 1, transcriptional regulator                                                        | Nucleus             |
| 9.154  | ENSG00000188039 | NWD1     | NACHT and WD repeat domain containing 1                                                             | Cytoplasm           |
| 5.793  | ENSG00000167693 | NXN      | nucleoredoxin                                                                                       | Nucleus             |
| 7.136  | ENSG00000197822 | OCLN     | occludin                                                                                            | Plasma Membrane     |
| 11.573 | ENSG00000119547 | ONECUT2  | one cut homeobox 2                                                                                  | Nucleus             |
| 3.102  | ENSG00000079482 | OPHN1    | oligophrenin 1                                                                                      | Cytoplasm           |
| 24.102 | ENSG00000180785 | ORS1E1   | olfactory receptor family 51 subfamily E member 1                                                   | Plasma Membrane     |
| 2.813  | ENSG00000144645 | OSBPL10  | oxysterol binding protein like 10                                                                   | Cytoplasm           |
| 3.291  | ENSG00000169860 | P2RY1    | purinergic receptor P2Y1                                                                            | Plasma Membrane     |
| 4.347  | ENSG00000148498 | PARD3    | par-3 family cell polarity regulator                                                                | Plasma Membrane     |
| 5.57   | ENSG00000116117 | PARD3B   | par-3 family cell polarity regulator beta                                                           | Plasma Membrane     |
| 7.51   | ENSG00000197702 | PARVA    | parvin alpha                                                                                        | Cytoplasm           |
| 2.82   | ENSG00000188677 | PARVB    | parvin beta                                                                                         | Cytoplasm           |
| 5.752  | ENSG00000177425 | PABR1    | pro-apoptotic WT1 regulator                                                                         | Nucleus             |
| 1.828  | ENSG00000102390 | PBDC1    | polysaccharide biosynthesis domain containing 1                                                     | Other               |
| 23.528 | ENSG00000225937 | PCA3     | prostate cancer associated 3                                                                        | Other               |
| 7.154  | ENSG00000253438 | PCAT1    | prostate cancer associated transcript 1                                                             | Other               |
| 9.414  | ENSG00000265369 | PCAT18   | prostate cancer associated transcript 18                                                            | Other               |
| 2.551  | ENSG00000156453 | PCDH1    | protocadherin 1                                                                                     | Plasma Membrane     |
| 3.674  | ENSG00000184226 | PCDH9    | protocadherin 9                                                                                     | Plasma Membrane     |
| 8.61   | ENSG00000255622 | PCDHB17P | protocadherin beta 17 pseudogene                                                                    | Other               |
| 9.944  | ENSG00000186472 | PCLO     | piccolo presynaptic cytomatrix protein                                                              | Cytoplasm           |
| 2.387  | ENSG00000106244 | PDAP1    | PDGFA associated protein 1                                                                          | Cytoplasm           |
| 8.214  | ENSG00000128655 | PDE11A   | phosphodiesterase 11A                                                                               | Cytoplasm           |
| 4.647  | ENSG00000172572 | PDE3A    | phosphodiesterase 3A                                                                                | Cytoplasm           |
| 4.219  | ENSG00000197461 | PDGFA    | platelet derived growth factor subunit A                                                            | Extracellular Space |
| 5.263  | ENSG00000100311 | PDGFB    | platelet derived growth factor subunit B                                                            | Extracellular Space |
| 3.51   | ENSG00000065485 | PDIAs    | protein disulfide isomerase family A member 5                                                       | Cytoplasm           |
| 1.658  | ENSG00000152256 | PDK1     | pyruvate dehydrogenase kinase 1                                                                     | Cytoplasm           |
| 10.627 | ENSG00000154553 | PDLM3    | PDZ and LIM domain 3                                                                                | Cytoplasm           |
| 3.3    | ENSG00000163110 | PDLM5    | PDZ and LIM domain 5                                                                                | Cytoplasm           |
| 1.684  | ENSG00000179889 | PDXDC1   | pyridoxal dependent decarboxylase domain containing 1                                               | Cytoplasm           |
| 3.854  | ENSG00000133401 | PDZD2    | PDZ domain containing 2                                                                             | Plasma Membrane     |
| 24.593 | ENSG00000121440 | PDZRN3   | PDZ domain containing ring finger 3                                                                 | Extracellular Space |
| 3.89   | ENSG00000187800 | PEAR1    | platelet endothelial aggregation receptor 1                                                         | Plasma Membrane     |
| 3.091  | ENSG00000152684 | PELO     | pelota mRNA surveillance and ribosome rescue factor                                                 | Nucleus             |
| 2.928  | ENSG00000163737 | PF4      | platelet factor 4                                                                                   | Extracellular Space |
| 2.744  | ENSG00000013375 | PGM3     | phosphoglucomutase 3                                                                                | Cytoplasm           |
| 7.212  | ENSG00000181649 | PHLDA2   | pleckstrin homology like domain family A member 2                                                   | Cytoplasm           |

|        |                 |                         |                                                          |                     |
|--------|-----------------|-------------------------|----------------------------------------------------------|---------------------|
| 5.366  | ENSG00000174307 | PHLDA3                  | pleckstrin homology like domain family A member 3        | Plasma Membrane     |
| 2.189  | ENSG00000006576 | PHTF2                   | putative homeodomain transcription factor 2              | Cytoplasm           |
| 2.667  | ENSG00000100151 | PICK1                   | protein interacting with PRKCA 1                         | Cytoplasm           |
| 7.742  | ENSG00000162896 | PIGR                    | polymeric immunoglobulin receptor                        | Plasma Membrane     |
| 3.701  | ENSG00000205038 | PKHD1L1                 | PKHD1 like 1                                             | Extracellular Space |
| 10.479 | ENSG00000184363 | PKP3                    | plakophilin 3                                            | Plasma Membrane     |
| 2.179  | ENSG00000123739 | PLA2G12A                | phospholipase A2 group X1IA                              | Other               |
| 3.165  | ENSG00000116711 | PLA2G4A                 | phospholipase A2 group IVA                               | Cytoplasm           |
| 3.035  | ENSG00000105499 | PLA2G4C                 | phospholipase A2 group IVC                               | Plasma Membrane     |
| 4.06   | ENSG00000181690 | PLAG1                   | PLAG1 zinc finger                                        | Nucleus             |
| 5.53   | ENSG00000101333 | PLCB4                   | phospholipase C beta 4                                   | Cytoplasm           |
| 9.812  | ENSG00000138193 | PLCE1                   | phospholipase C epsilon 1                                | Cytoplasm           |
| 4.346  | ENSG00000114805 | PLCH1                   | phospholipase C eta 1                                    | Cytoplasm           |
| 7.075  | ENSG00000143850 | PLEKHA6                 | pleckstrin homology domain containing A6                 | Other               |
| 5.111  | ENSG00000166689 | PLEKHA7                 | pleckstrin homology domain containing A7                 | Cytoplasm           |
| 12.593 | ENSG00000054690 | PLEKHH1                 | pleckstrin homology, MyTH4 and FERM domain containing H1 | Cytoplasm           |
| 6.934  | ENSG00000152527 | PLEKHH2                 | pleckstrin homology, MyTH4 and FERM domain containing H2 | Cytoplasm           |
| 6.803  | ENSG00000068137 | PLEKHH3                 | pleckstrin homology, MyTH4 and FERM domain containing H3 | Extracellular Space |
| 4.987  | ENSG00000187583 | PLEKHN1                 | pleckstrin homology domain containing N1                 | Cytoplasm           |
| 25.878 | ENSG00000148735 | PLEKHS1                 | pleckstrin homology domain containing S1                 | Other               |
| 4.553  | ENSG00000145632 | PLK2                    | polo like kinase 2                                       | Nucleus             |
| 4.576  | ENSG00000152952 | PLOD2                   | procollagen-lysine,2-oxoglutarate 5-dioxygenase 2        | Cytoplasm           |
| 3.191  | ENSG00000130827 | PLXNA3                  | plexin A3                                                | Plasma Membrane     |
| 5.044  | ENSG00000164050 | PLXNB1                  | plexin B1                                                | Plasma Membrane     |
| 4.107  | ENSG00000198753 | PLXNB3                  | plexin B3                                                | Plasma Membrane     |
| 2.463  | ENSG00000146281 | PM20D2                  | peptidase M20 domain containing 2                        | Nucleus             |
| 6.295  | ENSG00000124225 | PMEP1                   | prostate transmembrane protein, androgen induced 1       | Plasma Membrane     |
| 2.033  | ENSG00000176903 | PNMA1                   | PNMA family member 1                                     | Nucleus             |
| 6.665  | ENSG00000196604 | POTEE/POTEF             | POTE ankyrin domain family member E                      | Extracellular Space |
| 8.886  | ENSG00000198062 | POTEG (includes others) | POTE ankyrin domain family member G                      | Other               |
| 13.097 | ENSG00000196834 | POTEI                   | POTE ankyrin domain family member I                      | Extracellular Space |
| 8.644  | ENSG00000222038 | POTEJ                   | POTE ankyrin domain family member J                      | Extracellular Space |
| 7.787  | ENSG00000204531 | POU5F1                  | POU class 5 homeobox 1                                   | Nucleus             |
| 25.186 | ENSG00000139220 | PPF1A2                  | PTPRF interacting protein alpha 2                        | Plasma Membrane     |
| 4.525  | ENSG00000110841 | PPF1BP1                 | PPFIA binding protein 1                                  | Plasma Membrane     |
| 1.508  | ENSG00000138398 | PPIG                    | peptidylprolyl isomerase G                               | Nucleus             |
| 10.358 | ENSG00000118898 | PPL                     | periplakin                                               | Cytoplasm           |
| 3.597  | ENSG00000087074 | PPP1R15A                | protein phosphatase 1 regulatory subunit 15A             | Cytoplasm           |
| 6.868  | ENSG00000131771 | PPP1R1B                 | protein phosphatase 1 regulatory inhibitor subunit 1B    | Cytoplasm           |
| 2.57   | ENSG00000138814 | PPP3CA                  | protein phosphatase 3 catalytic subunit alpha            | Cytoplasm           |
| 9.277  | ENSG00000175785 | PRIMA1                  | proline rich membrane anchor 1                           | Plasma Membrane     |
| 9.563  | ENSG00000162409 | PRKAA2                  | protein kinase AMP-activated catalytic subunit alpha 2   | Cytoplasm           |
| 7.475  | ENSG00000184304 | PRKD1                   | protein kinase D1                                        | Cytoplasm           |
| 4.182  | ENSG00000148426 | PROSER2                 | proline and serine rich 2                                | Other               |
| 8.049  | ENSG00000005001 | PRSS22                  | serine protease 22                                       | Extracellular Space |
| 24.126 | ENSG00000052344 | PRSS8                   | serine protease 8                                        | Extracellular Space |
| 5.499  | ENSG00000106772 | PRUNE2                  | prune homolog 2 with BCH domain                          | Cytoplasm           |
| 8.712  | ENSG00000167653 | PSCA                    | prostate stem cell antigen                               | Plasma Membrane     |
| 4.533  | ENSG00000156011 | PSD3                    | pleckstrin and Sec7 domain containing 3                  | Cytoplasm           |
| 3.105  | ENSG00000160013 | PTGIR                   | prostaglandin I2 receptor                                | Plasma Membrane     |
| 4.994  | ENSG00000106853 | PTGR1                   | prostaglandin reductase 1                                | Cytoplasm           |
| 3.5    | ENSG00000169398 | PTK2                    | protein tyrosine kinase 2                                | Cytoplasm           |
| 4.2    | ENSG00000112655 | PTK7                    | protein tyrosine kinase 7 (inactive)                     | Plasma Membrane     |
| 3.29   | ENSG00000159335 | PTMS                    | parathyromosin                                           | Nucleus             |
| 11.661 | ENSG00000152104 | PTPN14                  | protein tyrosine phosphatase, non-receptor type 14       | Cytoplasm           |
| 7.794  | ENSG00000070778 | PTPN21                  | protein tyrosine phosphatase, non-receptor type 21       | Cytoplasm           |
| 7      | ENSG00000070159 | PTPN3                   | protein tyrosine phosphatase, non-receptor type 3        | Cytoplasm           |
| 4.006  | ENSG00000142949 | PTPRF                   | protein tyrosine phosphatase, receptor type F            | Plasma Membrane     |
| 6.464  | ENSG00000152894 | PTPRK                   | protein tyrosine phosphatase, receptor type K            | Plasma Membrane     |
| 3.992  | ENSG00000155093 | PTPRN2                  | protein tyrosine phosphatase, receptor type N2           | Plasma Membrane     |
| 9.093  | ENSG00000060656 | PTPRU                   | protein tyrosine phosphatase, receptor type U            | Plasma Membrane     |
| 1.48   | ENSG00000183255 | PTTG1IP                 | PTTG1 interacting protein                                | Nucleus             |
| 4.074  | ENSG00000168994 | PXDC1                   | PX domain containing 1                                   | Other               |
| 2.999  | ENSG00000090565 | RAB11FIP3               | RAB11 family interacting protein 3                       | Cytoplasm           |
| 1.646  | ENSG00000143545 | RAB13                   | RAB13, member RAS oncogene family                        | Plasma Membrane     |
| 8.485  | ENSG00000124839 | RAB17                   | RAB17, member RAS oncogene family                        | Cytoplasm           |
| 9.942  | ENSG00000132698 | RAB25                   | RAB25, member RAS oncogene family                        | Cytoplasm           |
| 2.898  | ENSG00000041353 | RAB27B                  | RAB27B, member RAS oncogene family                       | Cytoplasm           |
| 2.685  | ENSG00000137502 | RAB30                   | RAB30, member RAS oncogene family                        | Cytoplasm           |
| 12.151 | ENSG00000169213 | RAB3B                   | RAB3B, member RAS oncogene family                        | Cytoplasm           |
| 1.709  | ENSG00000136238 | RAC1                    | Rac family small GTPase 1                                | Plasma Membrane     |
| 1.737  | ENSG00000100401 | RANGAP1                 | Ran GTPase activating protein 1                          | Nucleus             |
| 6.598  | ENSG00000108551 | RASD1                   | ras related dexamethasone induced 1                      | Cytoplasm           |
| 13.749 | ENSG00000165105 | RASEF                   | RAS and EF-hand domain containing                        | Cytoplasm           |
| 7.556  | ENSG00000123094 | RASSF8                  | Ras association domain family member 8                   | Extracellular Space |
| 5.013  | ENSG00000100320 | RBFOX2                  | RNA binding fox-1 homolog 2                              | Nucleus             |
| 3.012  | ENSG00000072042 | RDH11                   | retinol dehydrogenase 11                                 | Cytoplasm           |
| 2.062  | ENSG00000137710 | RDX                     | radixin                                                  | Cytoplasm           |
| 9.518  | ENSG00000076344 | RGS11                   | regulator of G protein signaling 11                      | Plasma Membrane     |
| 3.325  | ENSG00000182732 | RGS6                    | regulator of G protein signaling 6                       | Cytoplasm           |
| 4.449  | ENSG00000007384 | RHBDL1                  | rhomoid 5 homolog 1                                      | Cytoplasm           |
| 23.64  | ENSG00000158315 | RHBDL2                  | rhomoid like 2                                           | Plasma Membrane     |
| 1.853  | ENSG00000106615 | RHEB                    | Ras homolog, mTORC1 binding                              | Cytoplasm           |
| 3.371  | ENSG00000143878 | RHOB                    | ras homolog family member B                              | Cytoplasm           |
| 3.966  | ENSG00000072422 | RHOBTB1                 | Rho related BTB domain containing 1                      | Other               |
| 2.394  | ENSG00000164292 | RHOBTB3                 | Rho related BTB domain containing 3                      | Cytoplasm           |
| 3.164  | ENSG00000116574 | RHOV                    | ras homolog family member U                              | Cytoplasm           |
| 9.034  | ENSG00000104140 | RHOV                    | ras homolog family member V                              | Plasma Membrane     |
| 6.721  | ENSG00000131941 | RHPN2                   | rhopilin Rho GTPase binding protein 2                    | Cytoplasm           |
| 8.937  | ENSG00000183421 | RIPK4                   | receptor interacting serine/threonine kinase 4           | Nucleus             |
| 3.781  | ENSG00000042062 | RIPOR3                  | RIPOR family member 3                                    | Other               |

|        |                 |               |                                                          |                 |
|--------|-----------------|---------------|----------------------------------------------------------|-----------------|
| 11.543 | ENSG00000255794 | RMST          | rhabdomyosarcoma 2 associated transcript                 | Other           |
| 2.803  | ENSG00000200867 | RN75KP36      | RNA, 75K small nuclear pseudogene 36                     | Other           |
| 2.35   | ENSG00000240869 | RN75L128P     | chondroitin sulfate proteoglycan 4 pseudogene 3 Y-linked | Other           |
| 2.822  | ENSG00000244230 | RN75L151P     | RNA, 75L, cytoplasmic 151, pseudogene                    | Other           |
| 5.746  | ENSG00000264573 | RN75L15P      | chondroitin sulfate proteoglycan 4 pseudogene 3 Y-linked | Other           |
| 2.228  | ENSG00000244642 | RN75L396P     | RNA, 75L, cytoplasmic 396, pseudogene                    | Other           |
| 4.38   | ENSG00000241175 | RN75L494P     | RNA, 75L, cytoplasmic 494, pseudogene                    | Other           |
| 3.245  | ENSG00000263740 | RN75L4P       | RNA, 75L, cytoplasmic 4, pseudogene                      | Other           |
| 3.307  | ENSG00000265735 | RN75L5P       | RNA, 75L, cytoplasmic 5, pseudogene                      | Other           |
| 4.562  | ENSG00000264169 | RN75L665P     | RNA, 75L, cytoplasmic 665, pseudogene                    | Other           |
| 2.736  | ENSG00000239899 | RN75L674P     | RNA, 75L, cytoplasmic 674, pseudogene                    | Other           |
| 3.344  | ENSG00000239437 | RN75L752P     | chondroitin sulfate proteoglycan 4 pseudogene 3 Y-linked | Other           |
| 3.196  | ENSG00000264275 | RN75L753P     | chondroitin sulfate proteoglycan 4 pseudogene 3 Y-linked | Other           |
| 3.951  | ENSG00000241529 | RN75L767P     | chondroitin sulfate proteoglycan 4 pseudogene 3 Y-linked | Other           |
| 5.345  | ENSG00000201321 | RNA559        | RNA, 5S ribosomal 9                                      | Other           |
| 2.681  | ENSG00000199994 | RNA55P145     | RNA, 5S ribosomal pseudogene 145                         | Other           |
| 3.316  | ENSG00000201822 | RNA55P149     | RNA, 5S ribosomal pseudogene 149                         | Other           |
| 3.558  | ENSG00000199839 | RNA55P150     | RNA, 5S ribosomal pseudogene 150                         | Other           |
| 5.185  | ENSG00000200687 | RNA55P335     | RNA, 5S ribosomal pseudogene 335                         | Other           |
| 5.672  | ENSG00000200558 | RNA55P429     | RNA, 5S ribosomal pseudogene 429                         | Other           |
| 9.548  | ENSG00000115963 | RND3          | Rho family GTPase 3                                      | Cytoplasm       |
| 5.578  | ENSG00000108375 | RNF43         | ring finger protein 43                                   | Plasma Membrane |
| 1.823  | ENSG00000112130 | RNF8          | ring finger protein 8                                    | Nucleus         |
| 3.057  | ENSG00000206652 | RNU1-1        | RNA, U1 small nuclear 1                                  | Other           |
| 6.318  | ENSG00000238554 | RNU1-88P      | chondroitin sulfate proteoglycan 4 pseudogene 3 Y-linked | Other           |
| 7.089  | ENSG00000270103 | RNU11         | chondroitin sulfate proteoglycan 4 pseudogene 3 Y-linked | Other           |
| 6.689  | ENSG00000270022 | RNU12         | chondroitin sulfate proteoglycan 4 pseudogene 3 Y-linked | Other           |
| 7.762  | ENSG00000222985 | RNU2-14P      | chondroitin sulfate proteoglycan 4 pseudogene 3 Y-linked | Other           |
| 5.115  | ENSG00000222357 | RNU2-20P      | chondroitin sulfate proteoglycan 4 pseudogene 3 Y-linked | Other           |
| 5.597  | ENSG00000222293 | RNU2-36P      | RNA, U2 small nuclear 36, pseudogene                     | Other           |
| 8.234  | ENSG00000222076 | RNU2-3P       | RNA, U2 small nuclear 3, pseudogene                      | Other           |
| 7.186  | ENSG00000222426 | RNU2-50P      | RNA, U2 small nuclear 50, pseudogene                     | Other           |
| 5.324  | ENSG00000222414 | RNU2-59P      | chondroitin sulfate proteoglycan 4 pseudogene 3 Y-linked | Other           |
| 6.427  | ENSG00000223001 | RNU2-61P      | chondroitin sulfate proteoglycan 4 pseudogene 3 Y-linked | Other           |
| 5.358  | ENSG00000200795 | RNU4-1        | RNA, U4 small nuclear 1                                  | Nucleus         |
| 5.364  | ENSG00000202538 | RNU4-2        | RNA, U4 small nuclear 2                                  | Other           |
| 5.803  | ENSG00000264229 | RNU4ATAC      | RNA, U4atc small nuclear (U12-dependent splicing)        | Other           |
| 6.382  | ENSG00000199568 | RNU5A-1       | RNA, U5A small nuclear 1                                 | Other           |
| 6.44   | ENSG00000200156 | RNU5B-1       | RNA, U5B small nuclear 1                                 | Other           |
| 3.514  | ENSG00000199347 | RNU5E-1       | RNA, U5E small nuclear 1                                 | Other           |
| 8.559  | ENSG00000206899 | RNU6-36P      | RNA, U6 small nuclear 36, pseudogene                     | Other           |
| 3.231  | ENSG00000199562 | RNU6-37P      | chondroitin sulfate proteoglycan 4 pseudogene 3 Y-linked | Other           |
| 5.452  | ENSG00000202300 | RNU6-487P     | RNA, U6 small nuclear 487, pseudogene                    | Other           |
| 5.65   | ENSG00000272055 | RNU6-6P       | RNA, U6 small nuclear 6, pseudogene                      | Nucleus         |
| 7.566  | ENSG00000202240 | RNU6-737P     | chondroitin sulfate proteoglycan 4 pseudogene 3 Y-linked | Other           |
| 6.042  | ENSG00000221676 | RNU6ATAC      | RNA, U6atc small nuclear (U12-dependent splicing)        | Other           |
| 7.548  | ENSG00000201558 | RNVU1-6       | RNA, variant U1 small nuclear 6                          | Other           |
| 3.737  | ENSG00000201098 | RNY1          | RNA, Ro60-associated Y1                                  | Nucleus         |
| 4.35   | ENSG00000202354 | RNY3          | RNA, Ro60-associated Y3                                  | Other           |
| 10.012 | ENSG00000252316 | RNY4          | RNA, Ro60-associated Y4                                  | Other           |
| 2.798  | ENSG00000134318 | ROCK2         | Rho associated coiled-coil containing protein kinase 2   | Cytoplasm       |
| 7.482  | ENSG00000143365 | RORC          | RAR related orphan receptor C                            | Nucleus         |
| 5.99   | ENSG00000261069 | RP11-701H24.4 | chondroitin sulfate proteoglycan 4 pseudogene 3 Y-linked | Other           |
| 24.192 | ENSG00000267501 | RP11_108P202  | chondroitin sulfate proteoglycan 4 pseudogene 3 Y-linked | Other           |
| 7.304  | ENSG00000272459 | RP11_1277A33  | chondroitin sulfate proteoglycan 4 pseudogene 3 Y-linked | Other           |
| 2.528  | ENSG00000254877 | RP11_142C44   | chondroitin sulfate proteoglycan 4 pseudogene 3 Y-linked | Other           |
| 6.181  | ENSG00000261441 | RP11_217B11   | chondroitin sulfate proteoglycan 4 pseudogene 3 Y-linked | Other           |
| 9.848  | ENSG00000259390 | RP11_27M91    | chondroitin sulfate proteoglycan 4 pseudogene 3 Y-linked | Other           |
| 8.434  | ENSG00000258414 | RP11_35G091   | chondroitin sulfate proteoglycan 4 pseudogene 3 Y-linked | Other           |
| 9.232  | ENSG00000219329 | RP11_397G52   | chondroitin sulfate proteoglycan 4 pseudogene 3 Y-linked | Other           |
| 23.621 | ENSG00000258860 | RP11_561B113  | chondroitin sulfate proteoglycan 4 pseudogene 3 Y-linked | Other           |
| 9.356  | ENSG00000232536 | RP11_74C14    | chondroitin sulfate proteoglycan 4 pseudogene 3 Y-linked | Other           |
| 23.794 | ENSG00000256443 | RP11_794G241  | chondroitin sulfate proteoglycan 4 pseudogene 3 Y-linked | Other           |
| 8.685  | ENSG00000257829 | RP11_845M186  | chondroitin sulfate proteoglycan 4 pseudogene 3 Y-linked | Other           |
| 24.322 | ENSG00000260604 | RP1_140K85    | chondroitin sulfate proteoglycan 4 pseudogene 3 Y-linked | Other           |
| 2.277  | ENSG00000225528 | RP3-370M22.8  | chondroitin sulfate proteoglycan 4 pseudogene 3 Y-linked | Other           |
| 2.339  | ENSG00000197498 | RPF2          | ribosome production factor 2 homolog                     | Nucleus         |
| 23.459 | ENSG00000243592 | RPL17P22      | ribosomal protein L17 pseudogene 22                      | Other           |
| 2.588  | ENSG0000037241  | RPL26L1       | ribosomal protein L26 like 1                             | Cytoplasm       |
| 12.16  | ENSG00000242899 | RPL7P16       | ribosomal protein L7 pseudogene 16                       | Other           |
| 3.873  | ENSG00000259001 | RPPH1         | chondroitin sulfate proteoglycan 4 pseudogene 3 Y-linked | Other           |
| 23.938 | ENSG00000215184 | RPS12P16      | ribosomal protein S12 pseudogene 16                      | Other           |
| 6.667  | ENSG00000072133 | RPS6KA6       | ribosomal protein S6 kinase A6                           | Cytoplasm       |
| 1.571  | ENSG00000125844 | RRBP1         | ribosome binding protein 1                               | Cytoplasm       |
| 2.771  | ENSG00000176783 | RUFY1         | RUN and FYVE domain containing 1                         | Cytoplasm       |
| 3.683  | ENSG00000165821 | SALL2         | spalt like transcription factor 2                        | Nucleus         |
| 3.804  | ENSG00000151748 | SAV1          | salvador family WW domain containing protein 1           | Cytoplasm       |
| 2.948  | ENSG00000109929 | SC5D          | sterol-C5-desaturase                                     | Cytoplasm       |
| 2.451  | ENSG00000239002 | SCARNA10      | small Cajal body-specific RNA 10                         | Nucleus         |
| 5.54   | ENSG00000251898 | SCARNA11      | small Cajal body-specific RNA 11                         | Other           |
| 1.922  | ENSG00000252481 | SCARNA13      | small Cajal body-specific RNA 13                         | Nucleus         |
| 3.531  | ENSG00000252690 | SCARNA15      | small Cajal body-specific RNA 15                         | Other           |
| 4.164  | ENSG00000252577 | SCARNA20      | small Cajal body-specific RNA 20                         | Other           |
| 8.749  | ENSG00000251869 | SCARNA23      | small Cajal body-specific RNA 23                         | Other           |
| 3.476  | ENSG00000252010 | SCARNA5       | small Cajal body-specific RNA 5                          | Nucleus         |
| 5.18   | ENSG00000251733 | SCARNA8       | small Cajal body-specific RNA 8                          | Other           |
| 8.445  | ENSG00000006747 | SCIN          | scinderin                                                | Cytoplasm       |
| 5.165  | ENSG00000111319 | SCNN1A        | sodium channel epithelial 1 alpha subunit                | Plasma Membrane |
| 9.578  | ENSG00000115884 | SDC1          | syndecan 1                                               | Plasma Membrane |
| 4.997  | ENSG00000169439 | SDC2          | syndecan 2                                               | Plasma Membrane |
| 5.412  | ENSG00000124145 | SDC4          | syndecan 4                                               | Plasma Membrane |

|        |                 |             |                                                                                                   |                     |
|--------|-----------------|-------------|---------------------------------------------------------------------------------------------------|---------------------|
| 4.505  | ENSG00000234684 | SDCBP2-AS1  | SDCBP2 antisense RNA 1                                                                            | Other               |
| 3.193  | ENSG00000174175 | SELP        | selectin P                                                                                        | Plasma Membrane     |
| 8.694  | ENSG00000001617 | SEMA3F      | semaphorin 3F                                                                                     | Extracellular Space |
| 2.64   | ENSG00000186522 |             | septin 10                                                                                         | Cytoplasm           |
| 1.924  | ENSG00000138758 |             | septin 11                                                                                         | Nucleus             |
| 3.59   | ENSG00000184702 |             | septin 5                                                                                          | Cytoplasm           |
| 7.797  | ENSG00000183569 | SERHL2      | serine hydrolase like 2                                                                           | Cytoplasm           |
| 6.859  | ENSG00000106366 | SERPINE1    | serpin family E member 1                                                                          | Extracellular Space |
| 23.791 | ENSG00000174938 | SEZ6L2      | seizure related 6 homolog like 2                                                                  | Cytoplasm           |
| 7.547  | ENSG00000175793 | SFN         | stratifin                                                                                         | Cytoplasm           |
| 2.066  | ENSG00000198964 | SGMS1       | sphingomyelin synthase 1                                                                          | Cytoplasm           |
| 4.394  | ENSG00000130147 | SH3BP4      | SH3 domain binding protein 4                                                                      | Cytoplasm           |
| 3.199  | ENSG00000107957 | SH3PXD2A    | SH3 and PX domains 2A                                                                             | Cytoplasm           |
| 4.542  | ENSG00000169247 | SH3TC2      | SH3 domain and tetratricopeptide repeats 2                                                        | Cytoplasm           |
| 9.232  | ENSG00000162105 | SHANK2      | SH3 and multiple ankyrin repeat domains 2                                                         | Plasma Membrane     |
| 2.968  | ENSG00000164403 | SHROOM1     | shroom family member 1                                                                            | Other               |
| 8.23   | ENSG00000146950 | SHROOM2     | shroom family member 2                                                                            | Plasma Membrane     |
| 10.391 | ENSG00000138771 | SHROOM3     | shroom family member 3                                                                            | Cytoplasm           |
| 8.574  | ENSG00000090402 | SI          | sucrase-isomaltase                                                                                | Cytoplasm           |
| 12.083 | ENSG00000159263 | SIM2        | SIM bHLH transcription factor 2                                                                   | Nucleus             |
| 3.349  | ENSG00000116991 | SIPA1L2     | signal induced proliferation associated 1 like 2                                                  | Other               |
| 7.27   | ENSG00000100625 | SIX4        | SIX homeobox 4                                                                                    | Nucleus             |
| 2.392  | ENSG00000064651 | SLC12A2     | solute carrier family 12 member 2                                                                 | Plasma Membrane     |
| 8.016  | ENSG00000221955 | SLC12A8     | solute carrier family 12 member 8                                                                 | Other               |
| 2.417  | ENSG00000137266 | SLC22A23    | solute carrier family 22 member 23                                                                | Other               |
| 9.072  | ENSG00000197496 | SLC2A10     | solute carrier family 2 member 10                                                                 | Plasma Membrane     |
| 6.978  | ENSG00000146411 | SLC2A12     | solute carrier family 2 member 12                                                                 | Plasma Membrane     |
| 1.906  | ENSG00000145740 | SLC30A5     | solute carrier family 30 member 5                                                                 | Plasma Membrane     |
| 4.44   | ENSG00000110660 | SLC35F2     | solute carrier family 35 member F2                                                                | Other               |
| 2.795  | ENSG00000160190 | SLC37A1     | solute carrier family 37 member 1                                                                 | Plasma Membrane     |
| 4.19   | ENSG00000141424 | SLC39A6     | solute carrier family 39 member 6                                                                 | Plasma Membrane     |
| 2.086  | ENSG00000138821 | SLC39A8     | solute carrier family 39 member 8                                                                 | Extracellular Space |
| 8.738  | ENSG00000204385 | SLC44A4     | solute carrier family 44 member 4                                                                 | Plasma Membrane     |
| 5.972  | ENSG00000158715 | SLC45A3     | solute carrier family 45 member 3                                                                 | Cytoplasm           |
| 5.1    | ENSG00000114923 | SLC4A3      | solute carrier family 4 member 3                                                                  | Plasma Membrane     |
| 4.687  | ENSG00000151012 | SLC7A11     | solute carrier family 7 member 11                                                                 | Plasma Membrane     |
| 10.248 | ENSG00000003989 | SLC7A2      | solute carrier family 7 member 2                                                                  | Plasma Membrane     |
| 3.528  | ENSG00000100678 | SLC8A3      | solute carrier family 8 member A3                                                                 | Plasma Membrane     |
| 2.882  | ENSG00000181804 | SLC9A9      | solute carrier family 9 member A9                                                                 | Cytoplasm           |
| 6.407  | ENSG00000102038 | SMARCA1     | SWI/SNF related, matrix associated, actin dependent regulator of chromatin, subfamily a, member 1 | Nucleus             |
| 1.968  | ENSG00000102172 | SMS         | spermine synthase                                                                                 | Cytoplasm           |
| 3.905  | ENSG00000183963 | SMTN        | smoothelin                                                                                        | Extracellular Space |
| 2.216  | ENSG00000092531 | SNAP23      | synaptosome associated protein 23                                                                 | Plasma Membrane     |
| 2.572  | ENSG00000255717 | SNHG1       | small nucleolar RNA host gene 1                                                                   | Other               |
| 3.004  | ENSG00000197989 | SNHG12      | small nucleolar RNA host gene 12                                                                  | Other               |
| 5.9    | ENSG00000266402 | SNHG25      | chondroitin sulfate proteoglycan 4 pseudogene 3 Y-linked                                          | Other               |
| 10.314 | ENSG00000221716 | SNORA11     | small nucleolar RNA, H/ACA box 11                                                                 | Other               |
| 5.903  | ENSG00000207181 | SNORA14B    | small nucleolar RNA, H/ACA box 14B                                                                | Other               |
| 6.485  | ENSG00000207392 | SNORA20     | small nucleolar RNA, H/ACA box 20                                                                 | Other               |
| 4.323  | ENSG00000206634 | SNORA22     | small nucleolar RNA, H/ACA box 22                                                                 | Other               |
| 6.936  | ENSG00000207344 | SNORA22C    | small nucleolar RNA, H/ACA box 22C                                                                | Other               |
| 8.066  | ENSG00000201998 | SNORA23     | small nucleolar RNA, H/ACA box 23                                                                 | Other               |
| 3.878  | ENSG00000253051 | SNORA31B    | small nucleolar RNA, H/ACA box 31B                                                                | Other               |
| 5.46   | ENSG00000222370 | SNORA36B    | small nucleolar RNA, H/ACA box 36B                                                                | Other               |
| 6.721  | ENSG00000212607 | SNORA3B     | small nucleolar RNA, H/ACA box 3B                                                                 | Other               |
| 7.958  | ENSG00000208308 | SNORA40B    | small nucleolar RNA, H/ACA box 40B                                                                | Other               |
| 2.749  | ENSG00000238961 | SNORA47     | small nucleolar RNA, H/ACA box 47                                                                 | Other               |
| 2.984  | ENSG00000208892 | SNORA49     | small nucleolar RNA, H/ACA box 49                                                                 | Other               |
| 6.97   | ENSG00000201457 | SNORA55     | small nucleolar RNA, H/ACA box 55                                                                 | Other               |
| 6.083  | ENSG00000201302 | SNORA65     | small nucleolar RNA, H/ACA box 65                                                                 | Other               |
| 6.948  | ENSG00000207523 | SNORA66     | small nucleolar RNA, H/ACA box 66                                                                 | Other               |
| 4.599  | ENSG00000225091 | SNORA71A    | small nucleolar RNA, H/ACA box 71A                                                                | Other               |
| 4.08   | ENSG00000235408 | SNORA71B    | small nucleolar RNA, H/ACA box 71B                                                                | Other               |
| 5.613  | ENSG00000201512 | SNORA71C    | small nucleolar RNA, H/ACA box 71C                                                                | Other               |
| 6.276  | ENSG00000200354 | SNORA71D    | small nucleolar RNA, H/ACA box 71D                                                                | Other               |
| 6.024  | ENSG00000207067 | SNORA72     | small nucleolar RNA, H/ACA box 72                                                                 | Other               |
| 10.056 | ENSG00000200959 | SNORA74A    | small nucleolar RNA, H/ACA box 74A                                                                | Nucleus             |
| 7.927  | ENSG00000212402 | SNORA74B    | small nucleolar RNA, H/ACA box 74B                                                                | Other               |
| 5.46   | ENSG00000252213 | SNORA74D    | small nucleolar RNA, H/ACA box 74D                                                                | Other               |
| 6.251  | ENSG00000206885 | SNORA75     | small nucleolar RNA, H/ACA box 75                                                                 | Other               |
| 7.398  | ENSG00000221303 | SNORA79     | small nucleolar RNA, H/ACA box 79                                                                 | Other               |
| 8.205  | ENSG00000207475 | SNORA80E    | small nucleolar RNA, H/ACA box 80E                                                                | Other               |
| 6.202  | ENSG00000207063 | SNORD116-1  | small nucleolar RNA, C/D box 116-1                                                                | Other               |
| 9.799  | ENSG00000206621 | SNORD116-14 | small nucleolar RNA, C/D box 116-14                                                               | Other               |
| 7.593  | ENSG00000207174 | SNORD116-15 | small nucleolar RNA, C/D box 116-15                                                               | Other               |
| 8.279  | ENSG00000207263 | SNORD116-16 | small nucleolar RNA, C/D box 116-16                                                               | Other               |
| 9.658  | ENSG00000207001 | SNORD116-2  | small nucleolar RNA, C/D box 116-2                                                                | Other               |
| 7.066  | ENSG00000207375 | SNORD116-23 | small nucleolar RNA, C/D box 116-23                                                               | Other               |
| 9.356  | ENSG00000207279 | SNORD116-24 | small nucleolar RNA, C/D box 116-24                                                               | Other               |
| 11.098 | ENSG00000252326 | SNORD116-25 | small nucleolar RNA, C/D box 116-25                                                               | Other               |
| 10.683 | ENSG00000251815 | SNORD116-26 | small nucleolar RNA, C/D box 116-26                                                               | Other               |
| 5.579  | ENSG00000251896 | SNORD116-27 | small nucleolar RNA, C/D box 116-27                                                               | Other               |
| 10.332 | ENSG00000207245 | SNORD116-29 | small nucleolar RNA, C/D box 116-29                                                               | Other               |
| 6.721  | ENSG00000207442 | SNORD116-6  | small nucleolar RNA, C/D box 116-6                                                                | Other               |
| 9.224  | ENSG00000207093 | SNORD116-8  | small nucleolar RNA, C/D box 116-8                                                                | Other               |
| 5.916  | ENSG00000212304 | SNORD12     | small nucleolar RNA, C/D box 12                                                                   | Other               |
| 3.911  | ENSG00000222365 | SNORD12B    | small nucleolar RNA, C/D box 12B                                                                  | Other               |
| 2.946  | ENSG00000212232 | SNORD17     | small nucleolar RNA, C/D box 17                                                                   | Other               |
| 11.051 | ENSG00000263934 | SNORD3A     | small nucleolar RNA, C/D box 3A                                                                   | Other               |
| 4.715  | ENSG00000265185 | SNORD3B-1   | small nucleolar RNA, C/D box 3B-1                                                                 | Other               |
| 7.461  | ENSG00000264940 | SNORD3C     | small nucleolar RNA, C/D box 3C                                                                   | Other               |

|        |                 |          |                                                                        |                     |
|--------|-----------------|----------|------------------------------------------------------------------------|---------------------|
| 4.389  | ENSG00000207031 | SNORD59A | small nucleolar RNA, C/D box 59A                                       | Other               |
| 5.352  | ENSG00000206989 | SNORD63  | small nucleolar RNA, C/D box 63                                        | Other               |
| 7.276  | ENSG00000212158 | SNORD66  | small nucleolar RNA, C/D box 66                                        | Other               |
| 8.184  | ENSG00000212135 | SNORD67  | small nucleolar RNA, C/D box 67                                        | Other               |
| 3.118  | ENSG00000200785 | SNORD8   | small nucleolar RNA, C/D box 8                                         | Other               |
| 4.815  | ENSG00000212447 | SNORD90  | small nucleolar RNA, C/D box 90                                        | Other               |
| 5.395  | ENSG00000221539 | SNORD99  | small nucleolar RNA, C/D box 99                                        | Other               |
| 1.662  | ENSG00000124380 | SNRNP27  | small nuclear ribonucleoprotein U4/U6.U5 subunit 27                    | Nucleus             |
| 4.151  | ENSG00000128739 | SNRPN    | small nuclear ribonucleoprotein polypeptide N                          | Nucleus             |
| 2.096  | ENSG00000130340 | SNX9     | sorting nexin 9                                                        | Cytoplasm           |
| 3.245  | ENSG00000120832 | SOCS2    | suppressor of cytokine signaling 2                                     | Cytoplasm           |
| 4.394  | ENSG00000154556 | SORBS2   | sorbin and SH3 domain containing 2                                     | Plasma Membrane     |
| 1.77   | ENSG00000124766 | SOX4     | SRY-box 4                                                              | Nucleus             |
| 24.995 | ENSG00000125398 | SOX9     | SRY-box 9                                                              | Nucleus             |
| 10.248 | ENSG00000124664 | SPDEF    | SAM pointed domain containing ETS transcription factor                 | Nucleus             |
| 3.102  | ENSG00000176170 | SPHK1    | sphingosine kinase 1                                                   | Cytoplasm           |
| 24.042 | ENSG00000164266 | SPINK1   | serine peptidase inhibitor, Kazal type 1                               | Extracellular Space |
| 3.203  | ENSG00000166145 | SPINT1   | serine peptidase inhibitor, Kunitz type 1                              | Extracellular Space |
| 6.141  | ENSG00000152377 | SPOCK1   | SPARC (osteonectin), cwcv and kazal like domains proteoglycan 1        | Extracellular Space |
| 3.124  | ENSG00000198369 | SPRED2   | sprouty related EVH1 domain containing 2                               | Extracellular Space |
| 9.545  | ENSG00000173898 | SPTBN2   | spectrin beta, non-erythrocytic 2                                      | Cytoplasm           |
| 3.023  | ENSG00000197122 | SRC      | SRC proto-oncogene, non-receptor tyrosine kinase                       | Cytoplasm           |
| 2.271  | ENSG00000145687 | SSBP2    | single stranded DNA binding protein 2                                  | Nucleus             |
| 3.247  | ENSG00000117155 | SSX2IP   | SSX family member 2 interacting protein                                | Plasma Membrane     |
| 10.714 | ENSG00000178078 | STAP2    | signal transducing adaptor family member 2                             | Cytoplasm           |
| 12.855 | ENSG00000164647 | STEAP1   | STEAP family member 1                                                  | Plasma Membrane     |
| 11.211 | ENSG00000157214 | STEAP2   | STEAP2 metalloreductase                                                | Plasma Membrane     |
| 2.605  | ENSG00000123473 | STIL     | STIL centriolar assembly protein                                       | Nucleus             |
| 3.374  | ENSG00000198648 | STK39    | serine/threonine kinase 39                                             | Nucleus             |
| 3.566  | ENSG00000140022 | STON2    | stonin 2                                                               | Cytoplasm           |
| 4.348  | ENSG00000106089 | STX1A    | syntaxin 1A                                                            | Cytoplasm           |
| 3.7    | ENSG00000136854 | STXBP1   | syntaxin binding protein 1                                             | Cytoplasm           |
| 3.869  | ENSG00000175854 | SWI5     | SWI5 homologous recombination repair protein                           | Nucleus             |
| 1.668  | ENSG00000169895 | SYAP1    | synapse associated protein 1                                           | Nucleus             |
| 10.131 | ENSG00000147642 | SYBU     | syntabulin                                                             | Cytoplasm           |
| 2.699  | ENSG00000078269 | SYNJ2    | synaptojanin 2                                                         | Cytoplasm           |
| 12.567 | ENSG00000011347 | SYT7     | synaptotagmin 7                                                        | Cytoplasm           |
| 3.462  | ENSG00000137501 | SYTL2    | synaptotagmin like 2                                                   | Cytoplasm           |
| 4.096  | ENSG00000102362 | SYTL4    | synaptotagmin like 4                                                   | Cytoplasm           |
| 13.837 | ENSG00000138162 | TACC2    | transforming acidic coiled-coil containing protein 2                   | Nucleus             |
| 4.801  | ENSG00000115183 | TANC1    | tetratricopeptide repeat, ankyrin repeat and coiled-coil containing 1  | Plasma Membrane     |
| 4.401  | ENSG00000211689 | TARP     | TCR gamma alternate reading frame protein                              | Cytoplasm           |
| 2.728  | ENSG00000167291 | TBC1D16  | TBC1 domain family member 16                                           | Extracellular Space |
| 8.616  | ENSG00000121068 | TBX2     | T-box 2                                                                | Nucleus             |
| 13.897 | ENSG00000135111 | TBX3     | T-box 3                                                                | Nucleus             |
| 4.942  | ENSG00000204219 | TCEA3    | transcription elongation factor A3                                     | Nucleus             |
| 3.113  | ENSG00000133142 | TCEAL4   | transcription elongation factor A like 4                               | Other               |
| 4.732  | ENSG00000185222 | TCEAL9   | transcription elongation factor A like 9                               | Other               |
| 11.872 | ENSG00000176907 | TCIM     | transcriptional and immune response regulator                          | Nucleus             |
| 23.638 | ENSG00000095627 | TDRD1    | tudor domain containing 1                                              | Cytoplasm           |
| 6.684  | ENSG00000187079 | TEAD1    | TEA domain transcription factor 1                                      | Nucleus             |
| 9.258  | ENSG00000197905 | TEAD4    | TEA domain transcription factor 4                                      | Nucleus             |
| 1.755  | ENSG00000135605 | TEC      | tec protein tyrosine kinase                                            | Cytoplasm           |
| 3.302  | ENSG00000270141 | TERC     | telomerase RNA component                                               | Nucleus             |
| 4.819  | ENSG00000115112 | TFCP2L1  | transcription factor CP2 like 1                                        | Nucleus             |
| 10.624 | ENSG00000160182 | TFF1     | trefoil factor 1                                                       | Extracellular Space |
| 6.346  | ENSG00000092969 | TGFB2    | transforming growth factor beta 2                                      | Extracellular Space |
| 4.226  | ENSG00000137801 | THBS1    | thrombospondin 1                                                       | Extracellular Space |
| 8.445  | ENSG00000104067 | TJP1     | tight junction protein 1                                               | Plasma Membrane     |
| 2.233  | ENSG00000119139 | TJP2     | tight junction protein 2                                               | Plasma Membrane     |
| 3.828  | ENSG00000196781 | TLE1     | TLE family member 1, transcriptional corepressor                       | Nucleus             |
| 9.307  | ENSG00000169908 | TM4SF1   | transmembrane 4 L six family member 1                                  | Plasma Membrane     |
| 2.001  | ENSG00000232112 | TMA7     | translation machinery associated 7 homolog                             | Other               |
| 4.058  | ENSG00000103534 | TMC5     | transmembrane channel like 5                                           | Cytoplasm           |
| 8.257  | ENSG00000144339 | TMEFF2   | transmembrane protein with EGF like and two follistatin like domains 2 | Cytoplasm           |
| 7.356  | ENSG00000144868 | TMEM108  | transmembrane protein 108                                              | Plasma Membrane     |
| 7.525  | ENSG00000006118 | TMEM132A | transmembrane protein 132A                                             | Cytoplasm           |
| 5.863  | ENSG00000249242 | TMEM150C | transmembrane protein 150C                                             | Plasma Membrane     |
| 7.007  | ENSG00000261115 | TMEM178B | transmembrane protein 178B                                             | Other               |
| 3.927  | ENSG00000088726 | TMEM40   | transmembrane protein 40                                               | Other               |
| 5.278  | ENSG00000151715 | TMEM45B  | transmembrane protein 45B                                              | Extracellular Space |
| 10.335 | ENSG00000184012 | TMPPRS2  | transmembrane serine protease 2                                        | Plasma Membrane     |
| 6.151  | ENSG00000127863 | TNFRSF19 | TNF receptor superfamily member 19                                     | Plasma Membrane     |
| 2.807  | ENSG00000117586 | TNFSF4   | TNF superfamily member 4                                               | Extracellular Space |
| 2.297  | ENSG00000154310 | TNIK     | TRAF2 and NCK interacting kinase                                       | Plasma Membrane     |
| 4.722  | ENSG00000149115 | TNKS1BP1 | tankyrase 1 binding protein 1                                          | Nucleus             |
| 4.784  | ENSG00000101470 | TNNC2    | troponin C2, fast skeletal type                                        | Cytoplasm           |
| 5.394  | ENSG00000141198 | TOM1L1   | target of myb1 like 1 membrane trafficking protein                     | Cytoplasm           |
| 2.298  | ENSG00000175662 | TOM1L2   | target of myb1 like 2 membrane trafficking protein                     | Cytoplasm           |
| 23.696 | ENSG00000103460 | TOX3     | TOX high mobility group box family member 3                            | Nucleus             |
| 4.401  | ENSG00000076554 | TPD52    | tumor protein D52                                                      | Cytoplasm           |
| 3.521  | ENSG00000140416 | TPM1     | tropomyosin 1                                                          | Cytoplasm           |
| 3.26   | ENSG00000167460 | TPM4     | tropomyosin 4                                                          | Cytoplasm           |
| 6.558  | ENSG00000171368 | TPPP     | tubulin polymerization promoting protein                               | Cytoplasm           |
| 3.013  | ENSG00000173334 | TRIB1    | tribbles pseudokinase 1                                                | Cytoplasm           |
| 2.316  | ENSG00000104228 | TRIM35   | tripartite motif containing 35                                         | Cytoplasm           |
| 4.488  | ENSG00000152503 | TRIM36   | tripartite motif containing 36                                         | Cytoplasm           |
| 1.452  | ENSG00000100815 | TRIP11   | thyroid hormone receptor interactor 11                                 | Cytoplasm           |
| 4.969  | ENSG00000137672 | TRPC6    | transient receptor potential cation channel subfamily C member 6       | Plasma Membrane     |
| 9.965  | ENSG00000144481 | TRPM8    | transient receptor potential cation channel subfamily M member 8       | Plasma Membrane     |
| 14.566 | ENSG00000165125 | TRPV6    | transient receptor potential cation channel subfamily V member 6       | Plasma Membrane     |

|         |                 |           |                                                                                |                     |
|---------|-----------------|-----------|--------------------------------------------------------------------------------|---------------------|
| 2.322   | ENSG00000102804 | TSC2D1    | TSC22 domain family member 1                                                   | Nucleus             |
| 8.355   | ENSG00000182704 | TSKU      | tsukushi, small leucine rich proteoglycan                                      | Extracellular Space |
| 4.683   | ENSG00000106537 | TSPAN13   | tetraspanin 13                                                                 | Plasma Membrane     |
| 5.54    | ENSG00000099282 | TSPAN15   | tetraspanin 15                                                                 | Plasma Membrane     |
| 9.316   | ENSG00000127324 | TSPAN8    | tetraspanin 8                                                                  | Plasma Membrane     |
| 3.445   | ENSG00000100154 | TTC28     | tetratricopeptide repeat domain 28                                             | Cytoplasm           |
| 4.305   | ENSG00000085831 | TTC39A    | tetratricopeptide repeat domain 39A                                            | Other               |
| 8.826   | ENSG00000139865 | TTC6      | tetratricopeptide repeat domain 6                                              | Other               |
| 2.436   | ENSG00000165914 | TTC7B     | tetratricopeptide repeat domain 7B                                             | Other               |
| 9.18    | ENSG00000162571 | TTL10     | tubulin tyrosine ligase like 10                                                | Cytoplasm           |
| 2.975   | ENSG00000137941 | TTL7      | tubulin tyrosine ligase like 7                                                 | Cytoplasm           |
| 24.297  | ENSG00000166402 | TUB       | tubby bipartite transcription factor                                           | Cytoplasm           |
| 3.185   | ENSG00000167553 | TUBA1C    | tubulin alpha 1c                                                               | Cytoplasm           |
| 2.576   | ENSG00000101162 | TUBB1     | tubulin beta 1 class VI                                                        | Cytoplasm           |
| 2.183   | ENSG00000188229 | TUBB4B    | tubulin beta 4B class IVb                                                      | Cytoplasm           |
| 6.295   | ENSG00000143367 | TUFT1     | tuftelin 1                                                                     | Cytoplasm           |
| 24.75   | ENSG00000250366 | TUNAR     | TCL1 upstream neural differentiation-associated RNA                            | Other               |
| 3.599   | ENSG00000137831 | UACA      | uveal autoantigen with coiled-coil domains and ankyrin repeats                 | Cytoplasm           |
| 1.691   | ENSG00000150991 | UBC       | ubiquitin C                                                                    | Cytoplasm           |
| 3.413   | ENSG00000109814 | UGDH      | UDP-glucose 6-dehydrogenase                                                    | Nucleus             |
| 24.388  | ENSG00000196620 | UGT2B15   | UDP glucuronosyltransferase family 2 member B15                                | Cytoplasm           |
| 2.574   | ENSG00000114491 | UMPS      | uridine monophosphate synthetase                                               | Cytoplasm           |
| 5.815   | ENSG00000198722 | UNC13B    | unc-13 homolog B                                                               | Cytoplasm           |
| 2.413   | ENSG00000173660 | UQCRH     | ubiquinol-cytochrome c reductase hinge protein                                 | Cytoplasm           |
| 2.402   | ENSG00000233954 | UQCRHL    | ubiquinol-cytochrome c reductase hinge protein like                            | Cytoplasm           |
| 5.421   | ENSG00000154914 | USP43     | ubiquitin specific peptidase 43                                                | Nucleus             |
| 6.332   | ENSG00000166348 | USP54     | ubiquitin specific peptidase 54                                                | Other               |
| 3.876   | ENSG00000173218 | VANGL1    | VANGL planar cell polarity protein 1                                           | Cytoplasm           |
| 1.724   | ENSG00000124164 | VAPB      | VAMP associated protein B and C                                                | Plasma Membrane     |
| 2.064   | ENSG00000035403 | VCL       | vinculin                                                                       | Plasma Membrane     |
| 1.629   | ENSG00000213585 | VDAC1     | voltage dependent anion channel 1                                              | Cytoplasm           |
| 2.918   | ENSG00000150630 | VEGFC     | vascular endothelial growth factor C                                           | Extracellular Space |
| 2.456   | ENSG00000196715 | VKORC1L1  | vitamin K epoxide reductase complex subunit 1 like 1                           | Cytoplasm           |
| 23.843  | ENSG00000202111 | VRNA1-2   | vault RNA 1-2                                                                  | Other               |
| 10.923  | ENSG00000179403 | VWA1      | von Willebrand factor A domain containing 1                                    | Extracellular Space |
| 23.501  | ENSG00000158816 | VWA5B1    | von Willebrand factor A domain containing 5B1                                  | Extracellular Space |
| 3.772   | ENSG00000110799 | VWF       | von Willebrand factor                                                          | Extracellular Space |
| 2.388   | ENSG00000131725 | WDR44     | WD repeat domain 44                                                            | Cytoplasm           |
| 1.67    | ENSG00000126870 | WDR60     | WD repeat domain 60                                                            | Extracellular Space |
| 9.743   | ENSG00000165238 | WNK2      | WNK lysine deficient protein kinase 2                                          | Cytoplasm           |
| 24.514  | ENSG00000196632 | WNK3      | WNK lysine deficient protein kinase 3                                          | Plasma Membrane     |
| 24.878  | ENSG00000188064 | WNT7B     | Wnt family member 7B                                                           | Extracellular Space |
| 8.858   | ENSG00000143816 | WNT9A     | Wnt family member 9A                                                           | Extracellular Space |
| 4.545   | ENSG00000142279 | WTIP      | WT1 interacting protein                                                        | Nucleus             |
| 8.925   | ENSG00000113645 | WWC1      | WW and C2 domain containing 1                                                  | Cytoplasm           |
| 6.024   | ENSG00000018408 | WWTR1     | WW domain containing transcription regulator 1                                 | Nucleus             |
| 23.593  | ENSG00000158125 | XDH       | xanthine dehydrogenase                                                         | Cytoplasm           |
| 5.107   | ENSG00000163092 | XIRP2     | xin actin binding repeat containing 2                                          | Other               |
| 2.621   | ENSG00000015532 | XYLT2     | xylosyltransferase 2                                                           | Cytoplasm           |
| 7.642   | ENSG00000137693 | YAP1      | Yes associated protein 1                                                       | Nucleus             |
| 3.262   | ENSG00000176105 | YES1      | YES proto-oncogene 1, Src family tyrosine kinase                               | Cytoplasm           |
| 1.445   | ENSG00000108953 | YWHAE     | tyrosine 3-monooxygenase/tryptophan 5-monooxygenase activation protein epsilon | Cytoplasm           |
| 2.057   | ENSG00000128245 | YWHAH     | tyrosine 3-monooxygenase/tryptophan 5-monooxygenase activation protein eta     | Cytoplasm           |
| 1.528   | ENSG00000257315 | ZBED6     | zinc finger BED-type containing 6                                              | Nucleus             |
| 2.425   | ENSG00000205189 | ZBTB10    | zinc finger and BTB domain containing 10                                       | Nucleus             |
| 3.22    | ENSG00000149289 | ZC3H12C   | zinc finger CCCH-type containing 12C                                           | Other               |
| 2.813   | ENSG00000121766 | ZCCHC17   | zinc finger CCHC-type containing 17                                            | Nucleus             |
| 12.026  | ENSG00000091656 | ZFX4      | zinc finger homeobox 4                                                         | Nucleus             |
| 4.279   | ENSG00000220201 | ZGLP1     | zinc finger GATA like protein 1                                                | Nucleus             |
| 6.813   | ENSG00000043355 | ZIC2      | Zic family member 2                                                            | Nucleus             |
| 10.957  | ENSG00000197279 | ZNF165    | zinc finger protein 165                                                        | Nucleus             |
| 4.398   | ENSG00000105497 | ZNF175    | zinc finger protein 175                                                        | Nucleus             |
| 8.295   | ENSG00000187595 | ZNF385C   | zinc finger protein 385C                                                       | Other               |
| 6.495   | ENSG00000148143 | ZNF462    | zinc finger protein 462                                                        | Nucleus             |
| 5.329   | ENSG00000196263 | ZNF471    | zinc finger protein 471                                                        | Nucleus             |
| 2.439   | ENSG00000179195 | ZNF664    | zinc finger protein 664                                                        | Nucleus             |
| 7.06    | ENSG00000164684 | ZNF704    | zinc finger protein 704                                                        | Nucleus             |
| -8.052  | ENSG00000268895 | A1BG-AS1  | A1BG antisense RNA 1                                                           | Other               |
| -5.782  | ENSG00000175899 | A2M       | alpha-2-macroglobulin                                                          | Extracellular Space |
| -9.407  | ENSG00000245105 | A2M-AS1   | A2M antisense RNA 1                                                            | Other               |
| -6.213  | ENSG00000266967 | AARSD1    | alanyl-tRNA synthetase domain containing 1                                     | Nucleus             |
| -6.328  | ENSG00000008311 | AASS      | aminoadipate-semialdehyde synthase                                             | Cytoplasm           |
| -10.493 | ENSG00000215458 | AATBC     | apoptosis associated transcript in bladder cancer                              | Other               |
| -6.383  | ENSG00000154263 | ABCA10    | ATP binding cassette subfamily A member 10                                     | Other               |
| -13.297 | ENSG00000179869 | ABCA13    | ATP binding cassette subfamily A member 13                                     | Extracellular Space |
| -7.076  | ENSG00000005471 | ABCB4     | ATP binding cassette subfamily B member 4                                      | Plasma Membrane     |
| -10.095 | ENSG00000243064 | ABCC13    | ATP binding cassette subfamily C member 13 (pseudogene)                        | Other               |
| -7.544  | ENSG00000091262 | ABCC6     | ATP binding cassette subfamily C member 6                                      | Plasma Membrane     |
| -9.105  | ENSG00000173208 | ABCD2     | ATP binding cassette subfamily D member 2                                      | Cytoplasm           |
| -4.806  | ENSG00000131969 | ABHD12B   | abhydrolase domain containing 12B                                              | Other               |
| -9.335  | ENSG00000168792 | ABHD15    | abhydrolase domain containing 15                                               | Extracellular Space |
| -2.905  | ENSG00000129968 | ABHD17A   | abhydrolase domain containing 17A                                              | Plasma Membrane     |
| -7.026  | ENSG00000136379 | ABHD17C   | abhydrolase domain containing 17C                                              | Plasma Membrane     |
| -9.679  | ENSG00000164074 | ABHD18    | abhydrolase domain containing 18                                               | Other               |
| -10.634 | ENSG00000011198 | ABHD5     | abhydrolase domain containing 5                                                | Cytoplasm           |
| -8.418  | ENSG00000163686 | ABHD6     | abhydrolase domain containing 6                                                | Cytoplasm           |
| -8.343  | ENSG00000127220 | ABHD8     | abhydrolase domain containing 8                                                | Cytoplasm           |
| -10.378 | ENSG00000108798 | ABI3      | ABI family member 3                                                            | Plasma Membrane     |
| -9.484  | ENSG00000163322 | ABRAXAS1  | abraxas 1, BRCA1 A complex subunit                                             | Nucleus             |
| -3.694  | ENSG00000114626 | ABTB1     | ankyrin repeat and BTB domain containing 1                                     | Cytoplasm           |
| -5.601  | ENSG00000243107 | AC0001207 | chondroitin sulfate proteoglycan 4 pseudogene 3 Y-linked                       | Other               |

|         |                 |            |                                                            |                     |
|---------|-----------------|------------|------------------------------------------------------------|---------------------|
| -5.42   | ENSG00000231170 | AC0024513  | chondroitin sulfate proteoglycan 4 pseudogene 3 Y-linked   | Other               |
| -6.368  | ENSG00000237773 | AC0030754  | chondroitin sulfate proteoglycan 4 pseudogene 3 Y-linked   | Other               |
| -5.887  | ENSG00000273447 | AC0040675  | chondroitin sulfate proteoglycan 4 pseudogene 3 Y-linked   | Other               |
| -6.332  | ENSG00000239556 | AC0049515  | chondroitin sulfate proteoglycan 4 pseudogene 3 Y-linked   | Other               |
| -5.356  | ENSG00000228434 | AC0049516  | chondroitin sulfate proteoglycan 4 pseudogene 3 Y-linked   | Other               |
| -9.031  | ENSG00000226816 | AC00508212 | chondroitin sulfate proteoglycan 4 pseudogene 3 Y-linked   | Other               |
| -7.213  | ENSG00000244480 | AC0051547  | chondroitin sulfate proteoglycan 4 pseudogene 3 Y-linked   | Other               |
| -5.548  | ENSG00000258559 | AC0055194  | chondroitin sulfate proteoglycan 4 pseudogene 3 Y-linked   | Other               |
| -5.616  | ENSG00000235852 | AC0055403  | chondroitin sulfate proteoglycan 4 pseudogene 3 Y-linked   | Other               |
| -5.697  | ENSG00000266897 | AC0055462  | chondroitin sulfate proteoglycan 4 pseudogene 3 Y-linked   | Other               |
| -8.549  | ENSG00000268027 | AC0061292  | chondroitin sulfate proteoglycan 4 pseudogene 3 Y-linked   | Other               |
| -7.123  | ENSG00000236213 | AC0063692  | chondroitin sulfate proteoglycan 4 pseudogene 3 Y-linked   | Other               |
| -6.872  | ENSG00000230751 | AC0070364  | chondroitin sulfate proteoglycan 4 pseudogene 3 Y-linked   | Other               |
| -6.662  | ENSG00000213090 | AC0072565  | chondroitin sulfate proteoglycan 4 pseudogene 3 Y-linked   | Other               |
| -9.806  | ENSG00000236525 | AC0072782  | chondroitin sulfate proteoglycan 4 pseudogene 3 Y-linked   | Other               |
| -11.527 | ENSG00000234389 | AC0072783  | chondroitin sulfate proteoglycan 4 pseudogene 3 Y-linked   | Other               |
| -5.786  | ENSG00000269318 | AC0072923  | chondroitin sulfate proteoglycan 4 pseudogene 3 Y-linked   | Other               |
| -6.454  | ENSG00000227946 | AC0073833  | chondroitin sulfate proteoglycan 4 pseudogene 3 Y-linked   | Other               |
| -5.518  | ENSG00000244055 | AC00756610 | chondroitin sulfate proteoglycan 4 pseudogene 3 Y-linked   | Other               |
| -6.698  | ENSG00000223725 | AC0078795  | chondroitin sulfate proteoglycan 4 pseudogene 3 Y-linked   | Other               |
| -9.374  | ENSG00000269688 | AC0089822  | chondroitin sulfate proteoglycan 4 pseudogene 3 Y-linked   | Other               |
| -6.928  | ENSG00000259972 | AC0091206  | chondroitin sulfate proteoglycan 4 pseudogene 3 Y-linked   | Other               |
| -6.811  | ENSG00000260719 | AC00913317 | chondroitin sulfate proteoglycan 4 pseudogene 3 Y-linked   | Other               |
| -5.674  | ENSG00000235192 | AC0094952  | chondroitin sulfate proteoglycan 4 pseudogene 3 Y-linked   | Other               |
| -6.28   | ENSG00000231794 | AC0095422  | chondroitin sulfate proteoglycan 4 pseudogene 3 Y-linked   | Other               |
| -5.175  | ENSG00000227055 | AC0099615  | chondroitin sulfate proteoglycan 4 pseudogene 3 Y-linked   | Other               |
| -4.749  | ENSG00000235081 | AC0104922  | chondroitin sulfate proteoglycan 4 pseudogene 3 Y-linked   | Other               |
| -5.536  | ENSG00000268833 | AC0115134  | chondroitin sulfate proteoglycan 4 pseudogene 3 Y-linked   | Other               |
| -5.989  | ENSG00000234073 | AC0118161  | chondroitin sulfate proteoglycan 4 pseudogene 3 Y-linked   | Other               |
| -5.665  | ENSG00000235128 | AC0134744  | chondroitin sulfate proteoglycan 4 pseudogene 3 Y-linked   | Other               |
| -7.698  | ENSG00000224442 | AC0170352  | chondroitin sulfate proteoglycan 4 pseudogene 3 Y-linked   | Other               |
| -6.393  | ENSG00000235683 | AC0184421  | chondroitin sulfate proteoglycan 4 pseudogene 3 Y-linked   | Other               |
| -6.274  | ENSG00000225314 | AC0186349  | chondroitin sulfate proteoglycan 4 pseudogene 3 Y-linked   | Other               |
| -6.369  | ENSG00000237039 | AC0187382  | chondroitin sulfate proteoglycan 4 pseudogene 3 Y-linked   | Other               |
| -7.484  | ENSG00000229023 | AC0679453  | chondroitin sulfate proteoglycan 4 pseudogene 3 Y-linked   | Other               |
| -6.3    | ENSG00000229512 | AC0685805  | chondroitin sulfate proteoglycan 4 pseudogene 3 Y-linked   | Other               |
| -5.342  | ENSG00000235027 | AC0685806  | chondroitin sulfate proteoglycan 4 pseudogene 3 Y-linked   | Other               |
| -9.204  | ENSG00000235499 | AC07304625 | chondroitin sulfate proteoglycan 4 pseudogene 3 Y-linked   | Other               |
| -7.173  | ENSG00000225187 | AC0732837  | chondroitin sulfate proteoglycan 4 pseudogene 3 Y-linked   | Other               |
| -5.848  | ENSG00000254094 | AC0788521  | chondroitin sulfate proteoglycan 4 pseudogene 3 Y-linked   | Other               |
| -6.394  | ENSG00000230773 | AC0798074  | chondroitin sulfate proteoglycan 4 pseudogene 3 Y-linked   | Other               |
| -5.692  | ENSG00000204745 | AC0838993  | chondroitin sulfate proteoglycan 4 pseudogene 3 Y-linked   | Other               |
| -6.945  | ENSG00000229368 | AC0905874  | chondroitin sulfate proteoglycan 4 pseudogene 3 Y-linked   | Other               |
| -5.811  | ENSG00000230532 | AC0911331  | chondroitin sulfate proteoglycan 4 pseudogene 3 Y-linked   | Other               |
| -5.925  | ENSG00000227189 | AC0925353  | chondroitin sulfate proteoglycan 4 pseudogene 3 Y-linked   | Other               |
| -6.083  | ENSG00000234231 | AC0936164  | chondroitin sulfate proteoglycan 4 pseudogene 3 Y-linked   | Other               |
| -7.785  | ENSG00000240859 | AC09362710 | chondroitin sulfate proteoglycan 4 pseudogene 3 Y-linked   | Other               |
| -5.673  | ENSG00000231494 | AC1046343  | chondroitin sulfate proteoglycan 4 pseudogene 3 Y-linked   | Other               |
| -5.596  | ENSG00000231079 | AC1054024  | chondroitin sulfate proteoglycan 4 pseudogene 3 Y-linked   | Other               |
| -5.294  | ENSG00000224638 | AC1069006  | chondroitin sulfate proteoglycan 4 pseudogene 3 Y-linked   | Other               |
| -7.05   | ENSG00000234290 | AC1163666  | chondroitin sulfate proteoglycan 4 pseudogene 3 Y-linked   | Other               |
| -6.055  | ENSG00000226155 | AC1249443  | chondroitin sulfate proteoglycan 4 pseudogene 3 Y-linked   | Other               |
| -9.437  | ENSG00000231259 | AC1252321  | chondroitin sulfate proteoglycan 4 pseudogene 3 Y-linked   | Other               |
| -6.595  | ENSG00000238035 | AC1380352  | chondroitin sulfate proteoglycan 4 pseudogene 3 Y-linked   | Other               |
| -4.595  | ENSG00000233799 | AC1398874  | chondroitin sulfate proteoglycan 4 pseudogene 3 Y-linked   | Other               |
| -8.268  | ENSG00000261888 | AC1448311  | chondroitin sulfate proteoglycan 4 pseudogene 3 Y-linked   | Other               |
| -7.389  | ENSG00000230606 | AC1595401  | chondroitin sulfate proteoglycan 4 pseudogene 3 Y-linked   | Other               |
| -6.657  | ENSG00000240303 | ACAD11     | acyl-CoA dehydrogenase family member 11                    | Cytoplasm           |
| -12.477 | ENSG00000072818 | ACAP1      | ArfGAP with coiled-coil, ankyrin repeat and PH domains 1   | Plasma Membrane     |
| -6.61   | ENSG00000229325 | ACAP2-IT1  | ACAP2 intronic transcript 1                                | Other               |
| -5.028  | ENSG00000159640 | ACE        | angiotensin I converting enzyme                            | Plasma Membrane     |
| -6.988  | ENSG00000213088 | ACKR1      | atypical chemokine receptor 1 (Duffy blood group)          | Plasma Membrane     |
| -6.083  | ENSG00000144648 | ACKR2      | atypical chemokine receptor 2                              | Plasma Membrane     |
| -5.988  | ENSG00000144476 | ACKR3      | atypical chemokine receptor 3                              | Plasma Membrane     |
| -7.794  | ENSG00000162390 | ACOT11     | acyl-CoA thioesterase 11                                   | Cytoplasm           |
| -6.681  | ENSG00000119673 | ACOT2      | acyl-CoA thioesterase 2                                    | Cytoplasm           |
| -9.473  | ENSG00000134575 | ACP2       | acid phosphatase 2, lysosomal                              | Cytoplasm           |
| -8.633  | ENSG00000167107 | ACSF2      | acyl-CoA synthetase family member 2                        | Cytoplasm           |
| -4.503  | ENSG00000176715 | ACSF3      | acyl-CoA synthetase family member 3                        | Cytoplasm           |
| -7.084  | ENSG00000107796 | ACTA2      | actin alpha 2, smooth muscle                               | Cytoplasm           |
| -7.345  | ENSG00000180139 | ACTA2-AS1  | ACTA2 antisense RNA 1                                      | Other               |
| -4.776  | ENSG00000241547 | ACTG1P20   | actin gamma 1 pseudogene 20                                | Other               |
| -6.436  | ENSG00000215388 | ACTG1P3    | actin gamma 1 pseudogene 3                                 | Other               |
| -2.656  | ENSG00000115073 | ACTR1B     | actin related protein 1B                                   | Cytoplasm           |
| -5.467  | ENSG00000123612 | ACVR1C     | activin A receptor type 1C                                 | Plasma Membrane     |
| -5.923  | ENSG00000139567 | ACVRL1     | activin A receptor like type 1                             | Plasma Membrane     |
| -7.949  | ENSG00000170634 | ACYP2      | acylphosphatase 2                                          | Cytoplasm           |
| -8.741  | ENSG00000196839 | ADA        | adenosine deaminase                                        | Cytoplasm           |
| -13.386 | ENSG00000093072 | ADA2       | adenosine deaminase 2                                      | Extracellular Space |
| -5.831  | ENSG00000148848 | ADAM12     | ADAM metalloproteinase domain 12                           | Plasma Membrane     |
| -12.215 | ENSG00000135074 | ADAM19     | ADAM metalloproteinase domain 19                           | Plasma Membrane     |
| -9.902  | ENSG00000042980 | ADAM28     | ADAM metalloproteinase domain 28                           | Plasma Membrane     |
| -9.125  | ENSG00000142303 | ADAMTS10   | ADAM metalloproteinase with thrombospondin type 1 motif 10 | Extracellular Space |
| -5.856  | ENSG00000160323 | ADAMTS13   | ADAM metalloproteinase with thrombospondin type 1 motif 13 | Extracellular Space |
| -6.47   | ENSG00000140470 | ADAMTS17   | ADAM metalloproteinase with thrombospondin type 1 motif 17 | Extracellular Space |
| -11.107 | ENSG00000087116 | ADAMTS2    | ADAM metalloproteinase with thrombospondin type 1 motif 2  | Extracellular Space |
| -6.309  | ENSG00000049192 | ADAMTS5    | ADAM metalloproteinase with thrombospondin type 1 motif 5  | Extracellular Space |
| -10.42  | ENSG00000143382 | ADAMTSL4   | ADAMTS like 4                                              | Extracellular Space |
| -9.25   | ENSG00000105963 | ADAP1      | ArfGAP with dual PH domains 1                              | Nucleus             |
| -6.968  | ENSG00000213638 | ADAT3      | adenosine deaminase tRNA specific 3                        | Nucleus             |
| -8.745  | ENSG00000161912 | ADCY10P1   | ADCY10 pseudogene 1                                        | Other               |



|         |                 |                         |                                                            |                     |
|---------|-----------------|-------------------------|------------------------------------------------------------|---------------------|
| -8.666  | ENSG00000129467 | ADCY4                   | adenylate cyclase 4                                        | Plasma Membrane     |
| -11.872 | ENSG00000121281 | ADCY7                   | adenylate cyclase 7                                        | Plasma Membrane     |
| -7.175  | ENSG00000020181 | ADGRA2                  | adhesion G protein-coupled receptor A2                     | Plasma Membrane     |
| -6.745  | ENSG00000135298 | ADGRB3                  | adhesion G protein-coupled receptor B3                     | Plasma Membrane     |
| -7.855  | ENSG00000111452 | ADGRD1                  | adhesion G protein-coupled receptor D1                     | Plasma Membrane     |
| -11.99  | ENSG00000127507 | ADGRE2                  | adhesion G protein-coupled receptor E2                     | Plasma Membrane     |
| -9.096  | ENSG00000131355 | ADGRE3                  | adhesion G protein-coupled receptor E3                     | Plasma Membrane     |
| -8.278  | ENSG00000268758 | ADGRE4P                 | adhesion G protein-coupled receptor E4, pseudogene         | Plasma Membrane     |
| -4.11   | ENSG00000123146 | ADGRE5                  | adhesion G protein-coupled receptor E5                     | Plasma Membrane     |
| -5.478  | ENSG00000205336 | ADGRG1                  | adhesion G protein-coupled receptor G1                     | Plasma Membrane     |
| -10.83  | ENSG00000182885 | ADGRG3                  | adhesion G protein-coupled receptor G3                     | Plasma Membrane     |
| -9.288  | ENSG00000159618 | ADGRG5                  | adhesion G protein-coupled receptor G5                     | Plasma Membrane     |
| -8.832  | ENSG00000106624 | AEBP1                   | AE binding protein 1                                       | Nucleus             |
| -7.929  | ENSG00000263335 | AF0015485               | chondroitin sulfate proteoglycan 4 pseudogene 3 Y-linked   | Other               |
| -7.274  | ENSG00000255310 | AF1312152               | chondroitin sulfate proteoglycan 4 pseudogene 3 Y-linked   | Other               |
| -6.815  | ENSG00000254556 | AF1312154               | chondroitin sulfate proteoglycan 4 pseudogene 3 Y-linked   | Other               |
| -11.119 | ENSG00000155966 | AF2                     | AF4/FMR2 family member 2                                   | Nucleus             |
| -8.317  | ENSG00000135537 | AFG1L                   | AFG1 like ATPase                                           | Cytoplasm           |
| -9.41   | ENSG00000038002 | AGA                     | aspartylglucosaminidase                                    | Cytoplasm           |
| -8.706  | ENSG00000204149 | AGAP5 (includes others) | ArfGAP with GTPase domain, ankyrin repeat and PH domain 5  | Other               |
| -6.863  | ENSG00000188234 | AGAP5 (includes others) | ArfGAP with GTPase domain, ankyrin repeat and PH domain 5  | Other               |
| -6.189  | ENSG00000165923 | AGBL2                   | ATP/GTP binding protein like 2                             | Cytoplasm           |
| -5.235  | ENSG00000162688 | AGL                     | amylase alpha-1, 6-glucosidase, 4-alpha-glucanotransferase | Cytoplasm           |
| -10.164 | ENSG00000026652 | AGPAT4                  | 1-acylglycerol-3-phosphate O-acyltransferase 4             | Cytoplasm           |
| -13.285 | ENSG00000204472 | AIF1                    | allograft inflammatory factor 1                            | Nucleus             |
| -7.526  | ENSG00000183773 | AIFM3                   | apoptosis inducing factor mitochondria associated 3        | Cytoplasm           |
| -8.438  | ENSG00000163568 | AIM2                    | absent in melanoma 2                                       | Cytoplasm           |
| -8.144  | ENSG00000232434 | AJM1                    | apical junction component 1 homolog                        | Other               |
| -5.792  | ENSG00000106992 | AK1                     | adenylate kinase 1                                         | Cytoplasm           |
| -1.577  | ENSG00000170776 | AKAP13                  | A-kinase anchoring protein 13                              | Cytoplasm           |
| -6.095  | ENSG00000111254 | AKAP3                   | A-kinase anchoring protein 3                               | Cytoplasm           |
| -7.409  | ENSG00000166452 | AKIP1                   | A-kinase interacting protein 1                             | Nucleus             |
| -4.583  | ENSG00000106948 | AKNA                    | AT-hook transcription factor                               | Nucleus             |
| -9.263  | ENSG00000085662 | AKR1B1                  | aldo-keto reductase family 1 member B                      | Cytoplasm           |
| -6.123  | ENSG00000244620 | AL12212725              | chondroitin sulfate proteoglycan 4 pseudogene 3 Y-linked   | Other               |
| -6.807  | ENSG00000237491 | AL669831.5              | chondroitin sulfate proteoglycan 4 pseudogene 3 Y-linked   | Other               |
| -4.973  | ENSG00000165092 | ALDH1A1                 | aldehyde dehydrogenase 1 family member A1                  | Cytoplasm           |
| -11.064 | ENSG00000006534 | ALDH3B1                 | aldehyde dehydrogenase 3 family member B1                  | Cytoplasm           |
| -6.79   | ENSG00000109107 | ALDOC                   | aldolase, fructose-bisphosphate C                          | Cytoplasm           |
| -7.401  | ENSG00000139133 | ALG10                   | ALG10 alpha-1,2-glucosyltransferase                        | Cytoplasm           |
| -6.888  | ENSG00000175548 | ALG10B                  | ALG10 alpha-1,2-glucosyltransferase B                      | Plasma Membrane     |
| -6.062  | ENSG00000172339 | ALG14                   | ALG14 UDP-N-acetylglucosaminyltransferase subunit          | Cytoplasm           |
| -8.314  | ENSG00000120697 | ALG5                    | ALG5 dolichyl-phosphate beta-glucosyltransferase           | Cytoplasm           |
| -6.996  | ENSG00000086848 | ALG9                    | ALG9 alpha-1,2-mannosyltransferase                         | Cytoplasm           |
| -8.093  | ENSG00000100601 | ALKBH1                  | alkB homolog 1, histone H2A dioxygenase                    | Cytoplasm           |
| -4.256  | ENSG00000160993 | ALKBH4                  | alkB homolog 4, lysine demethylase                         | Cytoplasm           |
| -9.168  | ENSG00000137760 | ALKBH8                  | alkB homolog 8, tRNA methyltransferase                     | Cytoplasm           |
| -7.034  | ENSG00000215067 | ALOX12-AS1              | ALOX12 antisense RNA 1                                     | Other               |
| -13.261 | ENSG00000012779 | ALOX5                   | arachidonate 5-lipoxygenase                                | Cytoplasm           |
| -11.645 | ENSG00000132965 | ALOX5AP                 | arachidonate 5-lipoxygenase activating protein             | Plasma Membrane     |
| -11.386 | ENSG00000073331 | ALPK1                   | alpha kinase 1                                             | Cytoplasm           |
| -7.156  | ENSG00000162551 | ALPL                    | alkaline phosphatase, biomineralization associated         | Plasma Membrane     |
| -7.699  | ENSG00000178038 | ALS2CL                  | ALS2 C-terminal like                                       | Cytoplasm           |
| -10.363 | ENSG00000155749 | ALS2CR12                | ALS2 chromosome region 12                                  | Cytoplasm           |
| -6.29   | ENSG00000139344 | AMDHD1                  | amidohydrolase domain containing 1                         | Cytoplasm           |
| -5.66   | ENSG00000104899 | AMH                     | anti-Mullerian hormone                                     | Extracellular Space |
| -8.555  | ENSG00000181754 | AMIGO1                  | adhesion molecule with Ig like domain 1                    | Plasma Membrane     |
| -4.517  | ENSG00000133805 | AMPD3                   | adenosine monophosphate deaminase 3                        | Cytoplasm           |
| -7.62   | ENSG00000145020 | AMT                     | aminomethyltransferase                                     | Cytoplasm           |
| -9.642  | ENSG00000240038 | AMY2B                   | amylase alpha 2B (pancreatic)                              | Extracellular Space |
| -8.38   | ENSG00000214174 | AMZ2P1                  | archaelysin family metalloproteinase 2 pseudogene 1        | Other               |
| -9.385  | ENSG00000129055 | ANAPC13                 | anaphase promoting complex subunit 13                      | Nucleus             |
| -8.579  | ENSG00000135233 | ANGEL1                  | angel homolog 1                                            | Extracellular Space |
| -6.243  | ENSG00000145362 | ANK2                    | ankyrin 2                                                  | Plasma Membrane     |
| -8.345  | ENSG00000151687 | ANKAR                   | ankyrin and armadillo repeat containing                    | Nucleus             |
| -7.685  | ENSG00000166839 | ANKDD1A                 | ankyrin repeat and death domain containing 1A              | Other               |
| -7.549  | ENSG00000132623 | ANKEF1                  | ankyrin repeat and EF-hand domain containing 1             | Nucleus             |
| -6.723  | ENSG00000229152 | ANKRD10-IT1             | ANKRD10 intronic transcript 1                              | Other               |
| -6.319  | ENSG00000159712 | ANKRD18CP               | ankyrin repeat domain 18C, pseudogene                      | Other               |
| -6.015  | ENSG00000145700 | ANKRD31                 | ankyrin repeat domain 31                                   | Extracellular Space |
| -5.867  | ENSG00000198483 | ANKRD35                 | ankyrin repeat domain 35                                   | Other               |
| -6.701  | ENSG00000213337 | ANKRD39                 | ankyrin repeat domain 39                                   | Other               |
| -13.048 | ENSG00000065413 | ANKRD44                 | ankyrin repeat domain 44                                   | Other               |
| -9.769  | ENSG00000236977 | ANKRD44-IT1             | ANKRD44 intronic transcript 1                              | Other               |
| -7.476  | ENSG00000171714 | ANO5                    | anoctamin 5                                                | Plasma Membrane     |
| -6.12   | ENSG00000237276 | ANO7L1                  | anoctamin 7 like 1                                         | Other               |
| -9.1    | ENSG00000185101 | ANO9                    | anoctamin 9                                                | Plasma Membrane     |
| -8.274  | ENSG00000177721 | ANXA2R                  | annexin A2 receptor                                        | Plasma Membrane     |
| -13.223 | ENSG00000136250 | AOAH                    | acyloxyacyl hydrolase                                      | Extracellular Space |
| -8.513  | ENSG00000230539 | AOAH-IT1                | AOAH intronic transcript 1                                 | Other               |
| -6.196  | ENSG00000273017 | AP0002409               | chondroitin sulfate proteoglycan 4 pseudogene 3 Y-linked   | Other               |
| -9.521  | ENSG00000272578 | AP0003472               | chondroitin sulfate proteoglycan 4 pseudogene 3 Y-linked   | Other               |
| -6.082  | ENSG00000234353 | AP0003474               | chondroitin sulfate proteoglycan 4 pseudogene 3 Y-linked   | Other               |
| -8.973  | ENSG00000273295 | AP0003505               | chondroitin sulfate proteoglycan 4 pseudogene 3 Y-linked   | Other               |
| -7.508  | ENSG00000228107 | AP0006929               | chondroitin sulfate proteoglycan 4 pseudogene 3 Y-linked   | Other               |
| -6.679  | ENSG00000234268 | AP0009361               | chondroitin sulfate proteoglycan 4 pseudogene 3 Y-linked   | Other               |
| -6.439  | ENSG00000237604 | AP0010561               | chondroitin sulfate proteoglycan 4 pseudogene 3 Y-linked   | Other               |
| -6.182  | ENSG00000260256 | AP0010631               | chondroitin sulfate proteoglycan 4 pseudogene 3 Y-linked   | Other               |
| -5.133  | ENSG00000225218 | AP0016286               | chondroitin sulfate proteoglycan 4 pseudogene 3 Y-linked   | Other               |
| -6.426  | ENSG00000228463 | AP0062222               | chondroitin sulfate proteoglycan 4 pseudogene 3 Y-linked   | Other               |
| -2.773  | ENSG00000072958 | AP1M1                   | adaptor related protein complex 1 subunit mu 1             | Cytoplasm           |

|         |                 |                   |                                                                                 |                     |
|---------|-----------------|-------------------|---------------------------------------------------------------------------------|---------------------|
| -10.45  | ENSG00000134262 | AP4B1             | adaptor related protein complex 4 subunit beta 1                                | Cytoplasm           |
| -4.252  | ENSG00000081014 | AP4E1             | adaptor related protein complex 4 subunit epsilon 1                             | Cytoplasm           |
| -10.196 | ENSG00000053770 | AP5M1             | adaptor related protein complex 5 subunit mu 1                                  | Cytoplasm           |
| -7.45   | ENSG00000125843 | AP5S1             | adaptor related protein complex 5 subunit sigma 1                               | Cytoplasm           |
| -5.68   | ENSG00000011132 | APBA3             | amyloid beta precursor protein binding family A member 3                        | Cytoplasm           |
| -12.478 | ENSG00000077420 | APBB1P            | amyloid beta precursor protein binding family B member 1 interacting protein    | Cytoplasm           |
| -5.052  | ENSG00000113108 | APBB3             | amyloid beta precursor protein binding family B member 3                        | Cytoplasm           |
| -8.404  | ENSG00000169188 | APEX2             | apurinic/aprimidinic endodeoxyribonuclease 2                                    | Nucleus             |
| -11.89  | ENSG00000128383 | APOBEC3A          | apolipoprotein B mRNA editing enzyme catalytic subunit 3A                       | Cytoplasm           |
| -7.449  | ENSG00000179750 | APOBEC3B          | apolipoprotein B mRNA editing enzyme catalytic subunit 3B                       | Cytoplasm           |
| -9.063  | ENSG00000243811 | APOBEC3D          | apolipoprotein B mRNA editing enzyme catalytic subunit 3D                       | Cytoplasm           |
| -11.032 | ENSG00000239713 | APOBEC3G          | apolipoprotein B mRNA editing enzyme catalytic subunit 3G                       | Nucleus             |
| -6.55   | ENSG00000100298 | APOBEC3H          | apolipoprotein B mRNA editing enzyme catalytic subunit 3H                       | Cytoplasm           |
| -6.306  | ENSG00000100336 | APOL4             | apolipoprotein L4                                                               | Extracellular Space |
| -2.163  | ENSG00000221963 | APOL6             | apolipoprotein L6                                                               | Extracellular Space |
| -6.048  | ENSG00000178878 | APOLD1            | apolipoprotein L domain containing 1                                            | Other               |
| -6.783  | ENSG00000184831 | APOO              | apolipoprotein O                                                                | Extracellular Space |
| -12.017 | ENSG00000103569 | AQP9              | aquaporin 9                                                                     | Plasma Membrane     |
| -1.845  | ENSG00000186635 | ARAP1             | ArfGAP with RhoGAP domain, ankyrin repeat and PH domain 1                       | Cytoplasm           |
| -7.411  | ENSG00000109321 | AREG              | amphiregulin                                                                    | Extracellular Space |
| -5.219  | ENSG00000118520 | ARG1              | arginase 1                                                                      | Cytoplasm           |
| -9.758  | ENSG00000075884 | ARHGAP15          | Rho GTPase activating protein 15                                                | Cytoplasm           |
| -10.063 | ENSG00000213390 | ARHGAP19          | Rho GTPase activating protein 19                                                | Cytoplasm           |
| -12.715 | ENSG00000163219 | ARHGAP25          | Rho GTPase activating protein 25                                                | Cytoplasm           |
| -5.884  | ENSG00000145819 | ARHGAP26          | Rho GTPase activating protein 26                                                | Cytoplasm           |
| -5.986  | ENSG00000230789 | ARHGAP26-IT1      | ARHGAP26 intronic transcript 1                                                  | Other               |
| -2.326  | ENSG00000159314 | ARHGAP27          | Rho GTPase activating protein 27                                                | Cytoplasm           |
| -14.209 | ENSG00000186517 | ARHGAP30          | Rho GTPase activating protein 30                                                | Cytoplasm           |
| -8.187  | ENSG00000165895 | ARHGAP42          | Rho GTPase activating protein 42                                                | Other               |
| -13.067 | ENSG00000123329 | ARHGAP9           | Rho GTPase activating protein 9                                                 | Cytoplasm           |
| -4.171  | ENSG00000076928 | ARHGEF1           | Rho guanine nucleotide exchange factor 1                                        | Cytoplasm           |
| -6.603  | ENSG00000142632 | ARHGEF19          | Rho guanine nucleotide exchange factor 19                                       | Cytoplasm           |
| -3.019  | ENSG00000116584 | ARHGEF2           | Rho/Rac guanine nucleotide exchange factor 2                                    | Cytoplasm           |
| -5.606  | ENSG00000137135 | ARHGEF39          | Rho guanine nucleotide exchange factor 39                                       | Plasma Membrane     |
| -5.441  | ENSG00000165801 | ARHGEF40          | Rho guanine nucleotide exchange factor 40                                       | Other               |
| -6.408  | ENSG00000221883 | ARIH2OS           | ariadne RBR E3 ubiquitin protein ligase 2 opposite strand                       | Other               |
| -10.116 | ENSG00000152213 | ARL11             | ADP ribosylation factor like GTPase 11                                          | Other               |
| -9.086  | ENSG00000214087 | ARL16             | ADP ribosylation factor like GTPase 16                                          | Cytoplasm           |
| -6.214  | ENSG00000228696 | ARL17A/ARL17B     | ADP ribosylation factor like GTPase 17A                                         | Other               |
| -6.801  | ENSG00000213465 | ARL2              | ADP ribosylation factor like GTPase 2                                           | Cytoplasm           |
| -6.524  | ENSG00000126947 | ARMCX1            | armadillo repeat containing X-linked 1                                          | Other               |
| -7.815  | ENSG00000196440 | ARMCX4            | armadillo repeat containing X-linked 4                                          | Other               |
| -8.882  | ENSG00000198520 | ARMH1             | armadillo-like helical domain containing 1                                      | Other               |
| -9.594  | ENSG00000146476 | ARMT1             | acidic residue methyltransferase 1                                              | Other               |
| -2.36   | ENSG00000143437 | ARNT              | aryl hydrocarbon receptor nuclear translocator                                  | Nucleus             |
| -11.115 | ENSG00000133794 | ARNTL             | aryl hydrocarbon receptor nuclear translocator like                             | Nucleus             |
| -7.68   | ENSG00000242498 | ARPIN/ARPIN-AP3S2 | ARPIN-AP3S2 readthrough                                                         | Plasma Membrane     |
| -7.386  | ENSG00000203993 | ARRDC1-AS1        | ARRDC1 antisense RNA 1                                                          | Other               |
| -9.546  | ENSG00000205784 | ARRDC5            | arrestin domain containing 5                                                    | Other               |
| -10.628 | ENSG00000113273 | ARSB              | arylsulfatase B                                                                 | Cytoplasm           |
| -9.724  | ENSG00000141337 | ARSG              | arylsulfatase G                                                                 | Cytoplasm           |
| -7.866  | ENSG00000164291 | ARSK              | arylsulfatase family member K                                                   | Extracellular Space |
| -6.949  | ENSG00000115239 | ASB3/GPR75-ASB3   | ankyrin repeat and SOCS box containing 3                                        | Cytoplasm           |
| -8.656  | ENSG00000183734 | ASCL2             | achaete-scute family bHLH transcription factor 2                                | Nucleus             |
| -9.783  | ENSG00000111875 | ASF1A             | anti-silencing function 1A histone chaperone                                    | Nucleus             |
| -8.65   | ENSG00000141505 | ASGR1             | asialoglycoprotein receptor 1                                                   | Plasma Membrane     |
| -10.675 | ENSG00000161944 | ASGR2             | asialoglycoprotein receptor 2                                                   | Plasma Membrane     |
| -6.007  | ENSG00000235919 | ASH1L-AS1         | ASH1L antisense RNA 1                                                           | Other               |
| -5.041  | ENSG00000227773 | ASH1L-IT1         | chondroitin sulfate proteoglycan 4 pseudogene 3 Y-linked                        | Other               |
| -6.244  | ENSG00000213199 | ASIC3             | acid sensing ion channel subunit 3                                              | Plasma Membrane     |
| -9.034  | ENSG00000236017 | ASMTL-AS1         | ASMTL antisense RNA 1                                                           | Other               |
| -1.914  | ENSG00000143970 | ASXL2             | ASXL transcriptional regulator 2                                                | Extracellular Space |
| -9.971  | ENSG00000123268 | ATF1              | activating transcription factor 1                                               | Nucleus             |
| -7.894  | ENSG00000152348 | ATG10             | autophagy related 10                                                            | Plasma Membrane     |
| -9.016  | ENSG00000125703 | ATG4C             | autophagy related 4C cysteine peptidase                                         | Cytoplasm           |
| -5.958  | ENSG00000181652 | ATG9B             | autophagy related 9B                                                            | Cytoplasm           |
| -2.337  | ENSG00000149311 | ATM               | ATM serine/threonine kinase                                                     | Nucleus             |
| -7.955  | ENSG00000177556 | ATOX1             | antioxidant 1 copper chaperone                                                  | Cytoplasm           |
| -11.088 | ENSG00000145246 | ATP10D            | ATPase phospholipid transporting 10D (putative)                                 | Cytoplasm           |
| -10.876 | ENSG00000159363 | ATP13A2           | ATPase cation transporting 13A2                                                 | Cytoplasm           |
| -7.943  | ENSG00000105409 | ATP1A3            | ATPase Na <sup>+</sup> /K <sup>+</sup> transporting subunit alpha 3             | Plasma Membrane     |
| -5.757  | ENSG00000249212 | ATP1B1P1          | ATPase Na <sup>+</sup> /K <sup>+</sup> transporting subunit beta 1 pseudogene 1 | Other               |
| -7.736  | ENSG00000129244 | ATP1B2            | ATPase Na <sup>+</sup> /K <sup>+</sup> transporting subunit beta 2              | Plasma Membrane     |
| -7.885  | ENSG00000166896 | ATP23             | ATP23 metalloproteinase and ATP synthase assembly factor homolog                | Plasma Membrane     |
| -6.281  | ENSG00000261286 | ATP2C2-AS1        | ATP2C2 antisense RNA 1                                                          | Other               |
| -7.678  | ENSG00000159199 | ATP5MC1           | ATP synthase membrane subunit c locus 1                                         | Cytoplasm           |
| -2.761  | ENSG00000182220 | ATP6AP2           | ATPase H <sup>+</sup> transporting accessory protein 2                          | Cytoplasm           |
| -5.812  | ENSG00000117410 | ATP6V0B           | ATPase H <sup>+</sup> transporting V0 subunit b                                 | Cytoplasm           |
| -7.44   | ENSG00000130270 | ATP8B3            | ATPase phospholipid transporting 8B3                                            | Cytoplasm           |
| -12.504 | ENSG00000104043 | ATP8B4            | ATPase phospholipid transporting 8B4 (putative)                                 | Plasma Membrane     |
| -3.099  | ENSG00000166377 | ATP9B             | ATPase phospholipid transporting 9B (putative)                                  | Cytoplasm           |
| -2.721  | ENSG00000175054 | ATR               | ATR serine/threonine kinase                                                     | Nucleus             |
| -1.973  | ENSG00000124788 | ATXN1             | ataxin 1                                                                        | Nucleus             |
| -1.296  | ENSG00000168488 | ATXN2L            | ataxin 2 like                                                                   | Nucleus             |
| -7.99   | ENSG00000162650 | ATXN7L2           | ataxin 7 like 2                                                                 | Other               |
| -7.71   | ENSG00000127423 | AUNIP             | aurora kinase A and ninein interacting protein                                  | Cytoplasm           |
| -7.745  | ENSG00000087586 | AURKA             | aurora kinase A                                                                 | Nucleus             |
| -7.065  | ENSG00000178999 | AURKB             | aurora kinase B                                                                 | Nucleus             |
| -5.977  | ENSG00000105146 | AURKC             | aurora kinase C                                                                 | Nucleus             |
| -6.549  | ENSG00000142920 | AZIN2             | antizyme inhibitor 2                                                            | Cytoplasm           |
| -10.575 | ENSG00000172232 | AZU1              | azurocidin 1                                                                    | Cytoplasm           |

|         |                 |              |                                                                      |                     |
|---------|-----------------|--------------|----------------------------------------------------------------------|---------------------|
| -6.487  | ENSG00000169255 | B3GALNT1     | beta-1,3-N-acetylgalactosaminyltransferase 1 (globoside blood group) | Cytoplasm           |
| -8.414  | ENSG00000162885 | B3GALNT2     | beta-1,3-N-acetylgalactosaminyltransferase 2                         | Cytoplasm           |
| -9.162  | ENSG00000235863 | B3GALT4      | beta-1,3-galactosyltransferase 4                                     | Cytoplasm           |
| -8.121  | ENSG00000187676 | B3GLCT       | beta-3-glucosyltransferase                                           | Cytoplasm           |
| -8.9    | ENSG00000177191 | B3GNT8       | UDP-GlcNAc:betaGal beta-1,3-N-acetylglucosaminyltransferase 8        | Cytoplasm           |
| -5.766  | ENSG00000237172 | B3GNT9       | UDP-GlcNAc:betaGal beta-1,3-N-acetylglucosaminyltransferase 9        | Cytoplasm           |
| -8.809  | ENSG00000175711 | B3GNTL1      | UDP-GlcNAc:betaGal beta-1,3-N-acetylglucosaminyltransferase like 1   | Other               |
| -7.898  | ENSG00000123810 | B9D2         | B9 domain containing 2                                               | Cytoplasm           |
| -6.175  | ENSG00000164929 | BAALC        | BAALC binder of MAP3K1 and KLF4                                      | Cytoplasm           |
| -8.341  | ENSG00000105393 | BABAM1       | BRISC and BRCA1 A complex member 1                                   | Nucleus             |
| -7.798  | ENSG00000248476 | BACH1-IT1    | chondroitin sulfate proteoglycan 4 pseudogene 3 Y-linked             | Other               |
| -7.853  | ENSG00000228817 | BACH1-IT2    | BACH1 intronic transcript 2                                          | Other               |
| -5.08   | ENSG00000140320 | BAHD1        | bromo adjacent homology domain containing 1                          | Nucleus             |
| -8.872  | ENSG00000156127 | BATF         | basic leucine zipper ATF-like transcription factor                   | Nucleus             |
| -6.967  | ENSG00000168062 | BATF2        | basic leucine zipper ATF-like transcription factor 2                 | Other               |
| -7.444  | ENSG00000123685 | BATF3        | basic leucine zipper ATF-like transcription factor 3                 | Nucleus             |
| -9.531  | ENSG00000122507 | BBS9         | Bardet-Biedl syndrome 9                                              | Extracellular Space |
| -5.544  | ENSG00000137936 | BCAR3        | BCAR3 adaptor protein, NSP family member                             | Cytoplasm           |
| -5.966  | ENSG00000124243 | BCAS4        | breast carcinoma amplified sequence 4                                | Cytoplasm           |
| -5.772  | ENSG00000060982 | BCAT1        | branched chain amino acid transaminase 1                             | Cytoplasm           |
| -6.464  | ENSG00000186666 | BCDIN3D      | BCDIN3 domain containing RNA methyltransferase                       | Cytoplasm           |
| -6.927  | ENSG00000248098 | BCKDHA       | branched chain keto acid dehydrogenase E1, alpha polypeptide         | Cytoplasm           |
| -5.245  | ENSG00000119866 | BCL11A       | BAF chromatin remodeling complex subunit BCL11A                      | Nucleus             |
| -12.226 | ENSG00000127152 | BCL11B       | BAF chromatin remodeling complex subunit BCL11B                      | Nucleus             |
| -4.636  | ENSG00000153094 | BCL2L11      | BCL2 like 11                                                         | Cytoplasm           |
| -8.648  | ENSG00000188761 | BCL2L15      | BCL2 like 15                                                         | Nucleus             |
| -7.516  | ENSG00000215580 | BCORP1       | BCL6 corepressor pseudogene 1                                        | Other               |
| -7.936  | ENSG00000074582 | BCS1L        | BCS1 homolog, ubiquinol-cytochrome c reductase complex chaperone     | Cytoplasm           |
| -6.966  | ENSG00000164039 | BDH2         | 3-hydroxybutyrate dehydrogenase 2                                    | Cytoplasm           |
| -5.696  | ENSG00000178409 | BEND3        | BEN domain containing 3                                              | Nucleus             |
| -9.771  | ENSG00000167995 | BEST1        | bestrophin 1                                                         | Plasma Membrane     |
| -10.484 | ENSG00000103429 | BFAR         | bifunctional apoptosis regulator                                     | Cytoplasm           |
| -8.088  | ENSG00000134897 | BIVM         | basic, immunoglobulin-like variable motif containing                 | Extracellular Space |
| -8.308  | ENSG00000136573 | BLK          | BLK proto-oncogene, Src family tyrosine kinase                       | Cytoplasm           |
| -7.793  | ENSG00000135441 | BLOC1S1      | biogenesis of lysosomal organelles complex 1 subunit 1               | Cytoplasm           |
| -7.803  | ENSG00000168487 | BMP1         | bone morphogenetic protein 1                                         | Extracellular Space |
| -5.712  | ENSG00000242338 | BMS1P4       | BMS1 pseudogene 4                                                    | Other               |
| -9.217  | ENSG00000102010 | BMX          | BMX non-receptor tyrosine kinase                                     | Cytoplasm           |
| -7.225  | ENSG00000163170 | BOLA3        | bolA family member 3                                                 | Cytoplasm           |
| -6.514  | ENSG00000225439 | BOLA3-AS1    | BOLA3 divergent transcript                                           | Other               |
| -7.953  | ENSG00000136122 | BORA         | BORA aurora kinase A activator                                       | Cytoplasm           |
| -5.599  | ENSG00000064489 | BORCS8-MEF2B | BORCS8-MEF2B readthrough                                             | Nucleus             |
| -13.19  | ENSG00000101425 | BPI          | bactericidal permeability increasing protein                         | Plasma Membrane     |
| -6.812  | ENSG00000251667 | BRCC3P1      | BRCA1/BRCA2-containing complex subunit 3 pseudogene 1                | Other               |
| -7.854  | ENSG00000235106 | BRD3O5       | BRD3 opposite strand                                                 | Other               |
| -5.958  | ENSG00000181097 | BREA2        | breast cancer estrogen-induced apoptosis 2                           | Other               |
| -6.781  | ENSG00000182685 | BRICD5       | BRICHOS domain containing 5                                          | Other               |
| -7.35   | ENSG00000168000 | BSC12        | BSC12 lipid droplet biogenesis associated, seipin                    | Cytoplasm           |
| -10.823 | ENSG00000109743 | BST1         | bone marrow stromal cell antigen 1                                   | Plasma Membrane     |
| -5.358  | ENSG00000229106 | BTBD6P1      | BTB domain containing 6 pseudogene 1                                 | Other               |
| -6.161  | ENSG00000189195 | BTBD8        | BTB domain containing 8                                              | Nucleus             |
| -8.495  | ENSG00000169814 | BTD          | biotinidase                                                          | Extracellular Space |
| -2.389  | ENSG00000145741 | BTTF3        | basic transcription factor 3                                         | Nucleus             |
| -7.765  | ENSG00000186265 | BTLA         | B and T lymphocyte associated                                        | Plasma Membrane     |
| -7.503  | ENSG00000124549 | BTN2A3P      | butyrophilin subfamily 2 member A3, pseudogene                       | Other               |
| -7.875  | ENSG00000113303 | BTNL8        | butyrophilin like 8                                                  | Plasma Membrane     |
| -6.655  | ENSG00000214688 | C10orf105    | chromosome 10 open reading frame 105                                 | Other               |
| -5.233  | ENSG00000237489 | C10orf143    | chromosome 10 open reading frame 143                                 | Other               |
| -5.912  | ENSG00000180066 | C10orf91     | chromosome 10 open reading frame 91 (putative)                       | Other               |
| -7.283  | ENSG00000137720 | C11orf1      | chromosome 11 open reading frame 1                                   | Nucleus             |
| -5.491  | ENSG00000166323 | C11orf65     | chromosome 11 open reading frame 65                                  | Other               |
| -8.331  | ENSG00000175573 | C11orf68     | chromosome 11 open reading frame 68                                  | Other               |
| -6.918  | ENSG00000180425 | C11orf71     | chromosome 11 open reading frame 71                                  | Other               |
| -7.268  | ENSG00000166352 | C11orf74     | chromosome 11 open reading frame 74                                  | Extracellular Space |
| -5.483  | ENSG00000179088 | C12orf42     | chromosome 12 open reading frame 42                                  | Other               |
| -7.799  | ENSG00000174206 | C12orf66     | chromosome 12 open reading frame 66                                  | Plasma Membrane     |
| -7.11   | ENSG00000204954 | C12orf73     | chromosome 12 open reading frame 73                                  | Other               |
| -8.649  | ENSG00000100802 | C14orf93     | chromosome 14 open reading frame 93                                  | Other               |
| -6.569  | ENSG00000186073 | C15orf41     | chromosome 15 open reading frame 41                                  | Other               |
| -6.81   | ENSG00000189227 | C15orf61     | chromosome 15 open reading frame 61                                  | Other               |
| -11.731 | ENSG00000185905 | C16orf54     | chromosome 16 open reading frame 54                                  | Extracellular Space |
| -10.331 | ENSG00000125149 | C16orf70     | chromosome 16 open reading frame 70                                  | Cytoplasm           |
| -7.572  | ENSG00000154102 | C16orf74     | chromosome 16 open reading frame 74                                  | Other               |
| -5.827  | ENSG00000159761 | C16orf86     | chromosome 16 open reading frame 86                                  | Other               |
| -6.902  | ENSG00000174109 | C16orf91     | chromosome 16 open reading frame 91                                  | Other               |
| -6.398  | ENSG00000212719 | C17orf51     | chromosome 17 open reading frame 51                                  | Other               |
| -5.99   | ENSG00000125319 | C17orf53     | chromosome 17 open reading frame 53                                  | Other               |
| -7.353  | ENSG00000214226 | C17orf67     | chromosome 17 open reading frame 67                                  | Other               |
| -8.425  | ENSG00000228300 | C19orf24     | chromosome 19 open reading frame 24                                  | Other               |
| -11.46  | ENSG00000214212 | C19orf38     | chromosome 19 open reading frame 38                                  | Other               |
| -6.621  | ENSG00000160392 | C19orf47     | chromosome 19 open reading frame 47                                  | Nucleus             |
| -5.883  | ENSG00000183397 | C19orf71     | chromosome 19 open reading frame 71                                  | Other               |
| -8.448  | ENSG00000171155 | C1GALT1C1    | C1GALT1 specific chaperone 1                                         | Cytoplasm           |
| -4.171  | ENSG00000131591 | C1orf159     | chromosome 1 open reading frame 159                                  | Other               |
| -12.457 | ENSG00000143110 | C1orf162     | chromosome 1 open reading frame 162                                  | Other               |
| -7.95   | ENSG00000173372 | C1QA         | complement C1q A chain                                               | Extracellular Space |
| -8.272  | ENSG00000159189 | C1QC         | complement C1q C chain                                               | Extracellular Space |
| -7.789  | ENSG00000133466 | C1QTNF6      | C1q and TNF related 6                                                | Extracellular Space |
| -10.143 | ENSG00000205885 | C1RL-AS1     | C1RL antisense RNA 1                                                 | Other               |
| -5.46   | ENSG00000166278 | C2           | complement C2                                                        | Extracellular Space |
| -6.766  | ENSG00000176659 | C20orf197    | chromosome 20 open reading frame 197                                 | Other               |

|         |                 |              |                                                                         |                     |
|---------|-----------------|--------------|-------------------------------------------------------------------------|---------------------|
| -5.101  | ENSG00000205930 | C21orf62-AS1 | C21orf62 antisense RNA 1                                                | Other               |
| -9.484  | ENSG00000188511 | C22orf34     | chromosome 22 open reading frame 34                                     | Other               |
| -5.451  | ENSG00000111731 | C2CD5        | C2 calcium dependent domain containing 5                                | Cytoplasm           |
| -6.134  | ENSG00000163009 | C2orf48      | chromosome 2 open reading frame 48                                      | Other               |
| -6.668  | ENSG00000186132 | C2orf76      | chromosome 2 open reading frame 76                                      | Other               |
| -6.08   | ENSG00000159239 | C2orf81      | chromosome 2 open reading frame 81                                      | Other               |
| -7.184  | ENSG00000228486 | C2orf92      | chromosome 2 open reading frame 92                                      | Other               |
| -8.422  | ENSG00000125730 | C3           | complement C3                                                           | Extracellular Space |
| -10.729 | ENSG00000171860 | C3AR1        | complement C3a receptor 1                                               | Plasma Membrane     |
| -8.088  | ENSG00000198590 | C3orf35      | chromosome 3 open reading frame 35                                      | Other               |
| -9.995  | ENSG00000179021 | C3orf38      | chromosome 3 open reading frame 38                                      | Nucleus             |
| -6.001  | ENSG00000225873 | C3orf86      | chromosome 3 open reading frame 86                                      | Other               |
| -9.246  | ENSG00000151470 | C4orf33      | chromosome 4 open reading frame 33                                      | Other               |
| -7.699  | ENSG00000243449 | C4orf48      | chromosome 4 open reading frame 48                                      | Other               |
| -12.532 | ENSG00000197405 | C5AR1        | complement C5a receptor 1                                               | Plasma Membrane     |
| -7.646  | ENSG00000134830 | C5AR2        | complement component 5a receptor 2                                      | Plasma Membrane     |
| -6.126  | ENSG00000172244 | C5orf34      | chromosome 5 open reading frame 34                                      | Other               |
| -5.603  | ENSG00000197536 | C5orf56      | chromosome 5 open reading frame 56                                      | Other               |
| -5.486  | ENSG00000224186 | C5orf66      | chromosome 5 open reading frame 66                                      | Other               |
| -8.576  | ENSG00000204564 | C6orf136     | chromosome 6 open reading frame 136                                     | Cytoplasm           |
| -8.297  | ENSG00000203872 | C6orf163     | chromosome 6 open reading frame 163                                     | Other               |
| -5.92   | ENSG00000156172 | C8orf37      | chromosome 8 open reading frame 37                                      | Cytoplasm           |
| -8.205  | ENSG00000213865 | C8orf44      | chromosome 8 open reading frame 44                                      | Nucleus             |
| -7.065  | ENSG00000241852 | C8orf58      | chromosome 8 open reading frame 58                                      | Nucleus             |
| -6.164  | ENSG00000189376 | C8orf76      | chromosome 8 open reading frame 76                                      | Other               |
| -6.619  | ENSG00000253250 | C8orf88      | chromosome 8 open reading frame 88                                      | Other               |
| -8.705  | ENSG00000180539 | C9orf139     | chromosome 9 open reading frame 139                                     | Other               |
| -5.994  | ENSG00000187753 | C9orf153     | chromosome 9 open reading frame 153                                     | Other               |
| -9.218  | ENSG00000135045 | C9orf40      | chromosome 9 open reading frame 40                                      | Other               |
| -8.913  | ENSG00000165118 | C9orf64      | chromosome 9 open reading frame 64                                      | Other               |
| -6.906  | ENSG00000183784 | C9orf66      | chromosome 9 open reading frame 66                                      | Other               |
| -5.51   | ENSG00000063180 | CA11         | carbonic anhydrase 11                                                   | Extracellular Space |
| -5.217  | ENSG00000241527 | CA15P1       | CA15 pseudogene 1                                                       | Other               |
| -7.459  | ENSG00000167434 | CA4          | carbonic anhydrase 4                                                    | Plasma Membrane     |
| -9.106  | ENSG00000186312 | CASBP1       | carbonic anhydrase 5B pseudogene 1                                      | Other               |
| -5.722  | ENSG00000178538 | CA8          | carbonic anhydrase 8                                                    | Cytoplasm           |
| -7.383  | ENSG00000175544 | CABP4        | calcium binding protein 4                                               | Plasma Membrane     |
| -5.785  | ENSG00000102001 | CACNA1F      | calcium voltage-gated channel subunit alpha1 F                          | Plasma Membrane     |
| -8.447  | ENSG00000100346 | CACNA1I      | calcium voltage-gated channel subunit alpha1 I                          | Plasma Membrane     |
| -5.222  | ENSG00000007402 | CACNA2D2     | calcium voltage-gated channel auxiliary subunit alpha2delta 2           | Plasma Membrane     |
| -6.735  | ENSG00000157445 | CACNA2D3     | calcium voltage-gated channel auxiliary subunit alpha2delta 3           | Plasma Membrane     |
| -9.409  | ENSG00000151062 | CACNA2D4     | calcium voltage-gated channel auxiliary subunit alpha2delta 4           | Plasma Membrane     |
| -6.124  | ENSG00000182389 | CACNB4       | calcium voltage-gated channel auxiliary subunit beta 4                  | Plasma Membrane     |
| -5.903  | ENSG00000142408 | CACNG8       | calcium voltage-gated channel auxiliary subunit gamma 8                 | Plasma Membrane     |
| -4.75   | ENSG00000105767 | CADM4        | cell adhesion molecule 4                                                | Plasma Membrane     |
| -5.423  | ENSG00000270419 | CAHM         | colon adenocarcinoma hypermethylated                                    | Other               |
| -6.964  | ENSG00000064989 | CALCR1       | calcitonin receptor like receptor                                       | Plasma Membrane     |
| -6.651  | ENSG00000138172 | CALHM2       | calcium homeostasis modulator family member 2                           | Other               |
| -9.57   | ENSG00000188820 | CALHM6       | calcium homeostasis modulator family member 6                           | Other               |
| -8.696  | ENSG00000129007 | CALML4       | calmodulin like 4                                                       | Other               |
| -5.41   | ENSG00000183049 | CAMK1D       | calcium/calmodulin dependent protein kinase ID                          | Cytoplasm           |
| -10.347 | ENSG00000152495 | CAMK4        | calcium/calmodulin dependent protein kinase IV                          | Nucleus             |
| -13.399 | ENSG00000164047 | CAMP         | cathelicidin antimicrobial peptide                                      | Cytoplasm           |
| -7.765  | ENSG00000259151 | CAP2P1       | cyclase associated actin cytoskeleton regulatory protein 2 pseudogene 1 | Other               |
| -12.033 | ENSG00000042493 | CAPG         | capping actin protein, gelsolin like                                    | Nucleus             |
| -8.111  | ENSG00000092529 | CAPN3        | calpain 3                                                               | Cytoplasm           |
| -6.374  | ENSG00000256812 | CAPNS2       | calpain small subunit 2                                                 | Cytoplasm           |
| -6.248  | ENSG00000180881 | CAPS2        | calcyphosine 2                                                          | Other               |
| -1.865  | ENSG00000116489 | CAPZA1       | capping actin protein of muscle Z-line subunit alpha 1                  | Cytoplasm           |
| -11.446 | ENSG00000198286 | CARD11       | caspase recruitment domain family member 11                             | Cytoplasm           |
| -9.63   | ENSG00000268001 | CARD8-AS1    | CARD8 antisense RNA 1                                                   | Other               |
| -9.728  | ENSG00000159753 | CARMIL2      | capping protein regulator and myosin 1 linker 2                         | Plasma Membrane     |
| -7.431  | ENSG00000186648 | CARMIL3      | capping protein regulator and myosin 1 linker 3                         | Plasma Membrane     |
| -12.649 | ENSG00000137752 | CASP1        | caspase 1                                                               | Cytoplasm           |
| -7.683  | ENSG00000235505 | CASP17P      | caspase 17, pseudogene                                                  | Other               |
| -6.473  | ENSG00000137757 | CASP5        | caspase 5                                                               | Cytoplasm           |
| -7.535  | ENSG00000138794 | CASP6        | caspase 6                                                               | Cytoplasm           |
| -1.639  | ENSG00000153113 | CAST         | calpastatin                                                             | Cytoplasm           |
| -8.275  | ENSG00000239521 | CASTOR3      | CASTOR family member 3                                                  | Other               |
| -3.542  | ENSG00000121691 | CAT          | catalase                                                                | Cytoplasm           |
| -4.824  | ENSG00000225062 | CATIP-AS1    | CATIP antisense RNA 1                                                   | Other               |
| -5.842  | ENSG00000205771 | CATSPER2P1   | cation channel sperm associated 2 pseudogene 1                          | Other               |
| -6.628  | ENSG00000179397 | CATSPERE     | catsper channel auxiliary subunit epsilon                               | Extracellular Space |
| -8.251  | ENSG00000099338 | CATSPERG     | cation channel sperm associated auxiliary subunit gamma                 | Extracellular Space |
| -3.309  | ENSG00000196873 | CBWD3/CBWD6  | COBW domain containing 3                                                | Other               |
| -5.739  | ENSG00000266405 | CBX3P2       | chromobox 3 pseudogene 2                                                | Other               |
| -5.754  | ENSG00000188649 | CC2D2B       | coiled-coil and C2 domain containing 2B                                 | Other               |
| -6.208  | ENSG00000150636 | CCDC102B     | coiled-coil domain containing 102B                                      | Extracellular Space |
| -6.522  | ENSG00000173581 | CCDC106      | coiled-coil domain containing 106                                       | Extracellular Space |
| -9.064  | ENSG00000136710 | CCDC115      | coiled-coil domain containing 115                                       | Cytoplasm           |
| -3.155  | ENSG00000159873 | CCDC117      | coiled-coil domain containing 117                                       | Other               |
| -8.949  | ENSG00000163492 | CCDC141      | coiled-coil domain containing 141                                       | Cytoplasm           |
| -8.485  | ENSG00000135637 | CCDC142      | coiled-coil domain containing 142                                       | Other               |
| -6.996  | ENSG00000170160 | CCDC144A     | coiled-coil domain containing 144A                                      | Other               |
| -7.655  | ENSG00000154898 | CCDC144CP    | coiled-coil domain containing 144C, pseudogene                          | Other               |
| -8.878  | ENSG00000135205 | CCDC146      | coiled-coil domain containing 146                                       | Cytoplasm           |
| -7.338  | ENSG00000198865 | CCDC152      | coiled-coil domain containing 152                                       | Other               |
| -5.994  | ENSG00000248712 | CCDC153      | coiled-coil domain containing 153                                       | Other               |
| -8.296  | ENSG00000159588 | CCDC17       | coiled-coil domain containing 17                                        | Other               |
| -7.883  | ENSG00000120262 | CCDC170      | coiled-coil domain containing 170                                       | Extracellular Space |
| -6.545  | ENSG00000197816 | CCDC180      | coiled-coil domain containing 180                                       | Cytoplasm           |

|         |                 |            |                                                                        |                     |
|---------|-----------------|------------|------------------------------------------------------------------------|---------------------|
| -6.721  | ENSG00000213213 | CCDC183    | coiled-coil domain containing 183                                      | Other               |
| -7.396  | ENSG00000139537 | CCDC65     | coiled-coil domain containing 65                                       | Other               |
| -13.452 | ENSG00000168071 | CCDC888    | coiled-coil domain containing 888                                      | Nucleus             |
| -6.22   | ENSG00000173013 | CCDC96     | coiled-coil domain containing 96                                       | Other               |
| -6.011  | ENSG00000185972 | CCIN       | calicin                                                                | Cytoplasm           |
| -7.757  | ENSG00000151882 | CCL28      | C-C motif chemokine ligand 28                                          | Extracellular Space |
| -5.573  | ENSG00000133101 | CCNA1      | cyclin A1                                                              | Nucleus             |
| -12.714 | ENSG00000118971 | CCND2      | cyclin D2                                                              | Nucleus             |
| -7.054  | ENSG00000105173 | CCNE1      | cyclin E1                                                              | Nucleus             |
| -6.704  | ENSG00000248283 | CCNL2P1    | cyclin L2 pseudogene 1                                                 | Other               |
| -7.031  | ENSG00000224043 | CCNT2-AS1  | CCNT2 antisense RNA 1                                                  | Other               |
| -11.548 | ENSG00000163823 | CCR1       | C-C motif chemokine receptor 1                                         | Plasma Membrane     |
| -12.149 | ENSG00000121807 | CCR2       | C-C motif chemokine receptor 2                                         | Plasma Membrane     |
| -10.137 | ENSG00000160791 | CCR5       | C-C motif chemokine receptor 5 (gene/pseudogene)                       | Plasma Membrane     |
| -9.774  | ENSG00000126353 | CCR7       | C-C motif chemokine receptor 7                                         | Plasma Membrane     |
| -7.157  | ENSG00000132141 | CCT6B      | chaperonin containing TCP1 subunit 6B                                  | Cytoplasm           |
| -6.574  | ENSG00000226015 | CCT8P1     | chaperonin containing TCP1 subunit 8 pseudogene 1                      | Other               |
| -4.103  | ENSG00000122674 | CCZ1/CCZ1B | CCZ1 homolog B, vacuolar protein trafficking and biogenesis associated | Cytoplasm           |
| -10.832 | ENSG00000134256 | CD101      | CD101 molecule                                                         | Plasma Membrane     |
| -13.281 | ENSG00000170458 | CD14       | CD14 molecule                                                          | Plasma Membrane     |
| -14.127 | ENSG00000177575 | CD163      | CD163 molecule                                                         | Plasma Membrane     |
| -6.504  | ENSG00000177675 | CD163L1    | CD163 molecule like 1                                                  | Plasma Membrane     |
| -11.025 | ENSG00000204936 | CD177      | CD177 molecule                                                         | Cytoplasm           |
| -9.182  | ENSG00000134061 | CD180      | CD180 molecule                                                         | Plasma Membrane     |
| -6.82   | ENSG00000177455 | CD19       | CD19 molecule                                                          | Plasma Membrane     |
| -5.961  | ENSG00000158477 | CD1A       | CD1a molecule                                                          | Plasma Membrane     |
| -8.091  | ENSG00000158481 | CD1C       | CD1c molecule                                                          | Plasma Membrane     |
| -11.162 | ENSG00000158473 | CD1D       | CD1d molecule                                                          | Plasma Membrane     |
| -11.081 | ENSG00000116824 | CD2        | CD2 molecule                                                           | Plasma Membrane     |
| -5.88   | ENSG00000091972 | CD200      | CD200 molecule                                                         | Plasma Membrane     |
| -7.787  | ENSG00000163606 | CD200R1    | CD200 receptor 1                                                       | Plasma Membrane     |
| -8.749  | ENSG00000012124 | CD22       | CD22 molecule                                                          | Plasma Membrane     |
| -11.915 | ENSG00000198821 | CD247      | CD247 molecule                                                         | Plasma Membrane     |
| -7.644  | ENSG00000139193 | CD27       | CD27 molecule                                                          | Plasma Membrane     |
| -7.627  | ENSG00000215039 | CD27-AS1   | CD27 antisense RNA 1                                                   | Other               |
| -12.331 | ENSG00000167851 | CD300A     | CD300a molecule                                                        | Plasma Membrane     |
| -9.528  | ENSG00000167850 | CD300C     | CD300c molecule                                                        | Plasma Membrane     |
| -13.872 | ENSG00000186407 | CD300E     | CD300e molecule                                                        | Plasma Membrane     |
| -10.212 | ENSG00000178789 | CD300LB    | CD300 molecule like family member b                                    | Plasma Membrane     |
| -10.693 | ENSG00000186074 | CD300LF    | CD300 molecule like family member f                                    | Plasma Membrane     |
| -12.436 | ENSG00000241399 | CD302      | CD302 molecule                                                         | Plasma Membrane     |
| -7.688  | ENSG00000167775 | CD320      | CD320 molecule                                                         | Plasma Membrane     |
| -11.62  | ENSG00000105383 | CD33       | CD33 molecule                                                          | Plasma Membrane     |
| -6.52   | ENSG00000174059 | CD34       | CD34 molecule                                                          | Plasma Membrane     |
| -12.821 | ENSG00000104894 | CD37       | CD37 molecule                                                          | Plasma Membrane     |
| -9.548  | ENSG00000167286 | CD3D       | CD3d molecule                                                          | Plasma Membrane     |
| -12.253 | ENSG00000198851 | CD3E       | CD3e molecule                                                          | Plasma Membrane     |
| -10.935 | ENSG00000160654 | CD3G       | CD3g molecule                                                          | Plasma Membrane     |
| -12.718 | ENSG00000010610 | CD4        | CD4 molecule                                                           | Plasma Membrane     |
| -8.272  | ENSG00000101017 | CD40       | CD40 molecule                                                          | Plasma Membrane     |
| -3.951  | ENSG00000026508 | CD44       | CD44 molecule (Indian blood group)                                     | Plasma Membrane     |
| -12.866 | ENSG00000117091 | CD48       | CD48 molecule                                                          | Plasma Membrane     |
| -11.192 | ENSG00000110448 | CD5        | CD5 molecule                                                           | Plasma Membrane     |
| -11.423 | ENSG00000169442 | CD52       | CD52 molecule                                                          | Plasma Membrane     |
| -13.358 | ENSG00000143119 | CD53       | CD53 molecule                                                          | Plasma Membrane     |
| -6.369  | ENSG00000129226 | CD68       | CD68 molecule                                                          | Plasma Membrane     |
| -5.163  | ENSG00000173762 | CD7        | CD7 molecule                                                           | Plasma Membrane     |
| -8.17   | ENSG00000137101 | CD72       | CD72 molecule                                                          | Plasma Membrane     |
| -4.665  | ENSG00000019582 | CD74       | CD74 molecule                                                          | Plasma Membrane     |
| -8.756  | ENSG00000105369 | CD79A      | CD79a molecule                                                         | Plasma Membrane     |
| -8.56   | ENSG00000007312 | CD79B      | CD79b molecule                                                         | Plasma Membrane     |
| -8.36   | ENSG00000112149 | CD83       | CD83 molecule                                                          | Plasma Membrane     |
| -11.684 | ENSG00000114013 | CD86       | CD86 molecule                                                          | Plasma Membrane     |
| -10.867 | ENSG00000153563 | CD8A       | CD8a molecule                                                          | Plasma Membrane     |
| -9.358  | ENSG00000172116 | CD8B       | CD8b molecule                                                          | Plasma Membrane     |
| -13.648 | ENSG00000125810 | CD93       | CD93 molecule                                                          | Plasma Membrane     |
| -11.602 | ENSG00000158825 | CDA        | cytidine deaminase                                                     | Nucleus             |
| -9.632  | ENSG00000102543 | CDADC1     | cytidine and dCMP deaminase domain containing 1                        | Other               |
| -5.613  | ENSG00000158402 | CDC25C     | cell division cycle 25C                                                | Nucleus             |
| -8.167  | ENSG00000149798 | CDC42EP2   | CDC42 effector protein 2                                               | Plasma Membrane     |
| -4.844  | ENSG00000097046 | CD7        | cell division cycle 7                                                  | Nucleus             |
| -8.708  | ENSG00000170779 | CDC4A      | cell division cycle associated 4                                       | Nucleus             |
| -6.576  | ENSG00000146670 | CDC45      | cell division cycle associated 5                                       | Cytoplasm           |
| -10.309 | ENSG00000107736 | CDH23      | cadherin related 23                                                    | Plasma Membrane     |
| -6.479  | ENSG00000124215 | CDH26      | cadherin 26                                                            | Plasma Membrane     |
| -7.033  | ENSG00000148600 | CDHR1      | cadherin related family member 1                                       | Plasma Membrane     |
| -5.769  | ENSG00000074276 | CDHR2      | cadherin related family member 2                                       | Plasma Membrane     |
| -6.616  | ENSG00000128536 | CDHR3      | cadherin related family member 3                                       | Plasma Membrane     |
| -7.046  | ENSG00000008128 | CDK11A     | cyclin dependent kinase 11A                                            | Nucleus             |
| -9.462  | ENSG00000129757 | CDKN1C     | cyclin dependent kinase inhibitor 1C                                   | Nucleus             |
| -7.151  | ENSG00000147889 | CDKN2A     | cyclin dependent kinase inhibitor 2A                                   | Nucleus             |
| -7.556  | ENSG00000237190 | CDKN2AIPNL | CDKN2A interacting protein N-terminal like                             | Other               |
| -8.239  | ENSG00000123080 | CDKN2C     | cyclin dependent kinase inhibitor 2C                                   | Nucleus             |
| -6.689  | ENSG00000205643 | CDPF1      | cysteine rich DPF motif domain containing 1                            | Extracellular Space |
| -11.39  | ENSG00000079385 | CEACAM1    | carcinoembryonic antigen related cell adhesion molecule 1              | Plasma Membrane     |
| -6.749  | ENSG00000186567 | CEACAM19   | carcinoembryonic antigen related cell adhesion molecule 19             | Other               |
| -9.817  | ENSG00000007129 | CEACAM21   | carcinoembryonic antigen related cell adhesion molecule 21             | Other               |
| -9.824  | ENSG00000170956 | CEACAM3    | carcinoembryonic antigen related cell adhesion molecule 3              | Other               |
| -10.321 | ENSG00000105352 | CEACAM4    | carcinoembryonic antigen related cell adhesion molecule 4              | Plasma Membrane     |
| -11.545 | ENSG00000086548 | CEACAM6    | carcinoembryonic antigen related cell adhesion molecule 6              | Plasma Membrane     |
| -13.585 | ENSG00000124469 | CEACAM8    | carcinoembryonic antigen related cell adhesion molecule 8              | Plasma Membrane     |

|         |                 |              |                                                                 |                     |
|---------|-----------------|--------------|-----------------------------------------------------------------|---------------------|
| -6.618  | ENSG00000245848 | CEBPA        | CCAAT enhancer binding protein alpha                            | Nucleus             |
| -4.541  | ENSG00000221869 | CEBPD        | CCAAT enhancer binding protein delta                            | Nucleus             |
| -9.093  | ENSG00000092067 | CEBPE        | CCAAT enhancer binding protein epsilon                          | Nucleus             |
| -7.546  | ENSG00000237438 | CECR7        | cat eye syndrome chromosome region, candidate 7                 | Other               |
| -7.271  | ENSG00000143126 | CELSR2       | cadherin EGF LAG seven-pass G-type receptor 2                   | Plasma Membrane     |
| -5.466  | ENSG00000205923 | CEMP1        | cementum protein 1                                              | Other               |
| -6.17   | ENSG00000166582 | CENPV        | centromere protein V                                            | Nucleus             |
| -7.514  | ENSG00000174007 | CEP19        | centrosomal protein 19                                          | Cytoplasm           |
| -8.109  | ENSG00000106477 | CEP41        | centrosomal protein 41                                          | Cytoplasm           |
| -5.788  | ENSG00000182923 | CEP63        | centrosomal protein 63                                          | Cytoplasm           |
| -8.302  | ENSG00000101624 | CEP76        | centrosomal protein 76                                          | Cytoplasm           |
| -11.959 | ENSG00000111860 | CEP85L       | centrosomal protein 85 like                                     | Cytoplasm           |
| -9.925  | ENSG00000198848 | CES1         | carboxylesterase 1                                              | Cytoplasm           |
| -8.1    | ENSG00000172824 | CES4A        | carboxylesterase 4A                                             | Extracellular Space |
| -5.933  | ENSG00000087237 | CETP         | cholesteryl ester transfer protein                              | Extracellular Space |
| -7.252  | ENSG00000159079 | CFAP298      | cilia and flagella associated protein 298                       | Cytoplasm           |
| -8.856  | ENSG00000160226 | CFAP410      | cilia and flagella associated protein 410                       | Cytoplasm           |
| -11.082 | ENSG00000197766 | CFD          | complement factor D                                             | Extracellular Space |
| -9.102  | ENSG00000000971 | CFH          | complement factor H                                             | Extracellular Space |
| -11.988 | ENSG00000126759 | CFP          | complement factor properdin                                     | Extracellular Space |
| -9.875  | ENSG00000164430 | CGAS         | cyclic GMP-AMP synthase                                         | Cytoplasm           |
| -7.597  | ENSG00000223804 | CH17_472G232 | chondroitin sulfate proteoglycan 4 pseudogene 3 Y-linked        | Other               |
| -9.536  | ENSG00000250479 | CHCHD10      | coiled-coil-helix-coiled-coil-helix domain containing 10        | Cytoplasm           |
| -7.313  | ENSG00000125611 | CHCHD5       | coiled-coil-helix-coiled-coil-helix domain containing 5         | Other               |
| -6.906  | ENSG00000064886 | CHI3L2       | chitinase 3 like 2                                              | Extracellular Space |
| -8.655  | ENSG00000204116 | CHIC1        | cysteine rich hydrophobic domain 1                              | Plasma Membrane     |
| -10.399 | ENSG00000133063 | CHIT1        | chitinase 1                                                     | Extracellular Space |
| -5.947  | ENSG00000205559 | CHKB-DT      | CHKB divergent transcript                                       | Other               |
| -6.655  | ENSG00000128656 | CHN1         | chimerin 1                                                      | Cytoplasm           |
| -8.334  | ENSG00000233355 | CHRM3-AS2    | CHRM3 antisense RNA 2                                           | Other               |
| -5.906  | ENSG00000180720 | CHRM4        | cholinergic receptor muscarinic 4                               | Plasma Membrane     |
| -7.691  | ENSG00000180767 | CHST13       | carbohydrate sulfotransferase 13                                | Cytoplasm           |
| -8.419  | ENSG00000169105 | CHST14       | carbohydrate sulfotransferase 14                                | Cytoplasm           |
| -8.939  | ENSG00000147119 | CHST7        | carbohydrate sulfotransferase 7                                 | Cytoplasm           |
| -11.266 | ENSG00000136305 | CIDEB        | cell death inducing DFFA like effector b                        | Cytoplasm           |
| -7.948  | ENSG00000186162 | CIDECP1      | cell death inducing DFFA like effector c pseudogene 1           | Other               |
| -7.105  | ENSG00000273192 | CITF22_1A63  | chondroitin sulfate proteoglycan 4 pseudogene 3 Y-linked        | Other               |
| -4.822  | ENSG00000217555 | CKLF         | chemokine like factor                                           | Extracellular Space |
| -5.977  | ENSG00000247572 | CKMT2-AS1    | CKMT2 antisense RNA 1                                           | Other               |
| -6.392  | ENSG00000173207 | CKS1B        | CDC28 protein kinase regulatory subunit 1B                      | Other               |
| -1.479  | ENSG00000163539 | CLASP2       | cytoplasmic linker associated protein 2                         | Cytoplasm           |
| -9.03   | ENSG00000105205 | CLC          | Charcot-Leyden crystal galectin                                 | Cytoplasm           |
| -7.042  | ENSG00000160318 | CLDN2        | claudin domain containing 2                                     | Other               |
| -9.108  | ENSG00000132514 | CLEC10A      | C-type lectin domain containing 10A                             | Plasma Membrane     |
| -6.818  | ENSG00000105472 | CLEC11A      | C-type lectin domain containing 11A                             | Extracellular Space |
| -12.99  | ENSG00000172322 | CLEC12A      | C-type lectin domain family 12 member A                         | Plasma Membrane     |
| -8.995  | ENSG00000256660 | CLEC12B      | C-type lectin domain family 12 member B                         | Plasma Membrane     |
| -6.367  | ENSG00000187912 | CLEC17A      | C-type lectin domain containing 17A                             | Plasma Membrane     |
| -5.761  | ENSG00000150048 | CLEC1A       | C-type lectin domain family 1 member A                          | Plasma Membrane     |
| -11.47  | ENSG00000110852 | CLEC2B       | C-type lectin domain family 2 member B                          | Plasma Membrane     |
| -11.184 | ENSG00000069493 | CLEC2D       | C-type lectin domain family 2 member D                          | Plasma Membrane     |
| -5.789  | ENSG00000236279 | CLEC2L       | C-type lectin domain family 2 member L                          | Other               |
| -9.259  | ENSG00000111729 | CLEC4A       | C-type lectin domain family 4 member A                          | Plasma Membrane     |
| -7.371  | ENSG00000198178 | CLEC4C       | C-type lectin domain family 4 member C                          | Plasma Membrane     |
| -10.916 | ENSG00000166527 | CLEC4D       | C-type lectin domain family 4 member D                          | Plasma Membrane     |
| -11.781 | ENSG00000166523 | CLEC4E       | C-type lectin domain family 4 member E                          | Plasma Membrane     |
| -10.371 | ENSG00000258227 | CLECSA       | C-type lectin domain containing 5A                              | Plasma Membrane     |
| -7.324  | ENSG00000205846 | CLEC6A       | C-type lectin domain containing 6A                              | Plasma Membrane     |
| -12.837 | ENSG00000172243 | CLEC7A       | C-type lectin domain containing 7A                              | Plasma Membrane     |
| -5.913  | ENSG00000184293 | CLECL1       | C-type lectin like 1                                            | Plasma Membrane     |
| -6.923  | ENSG00000169583 | CLIC3        | chloride intracellular channel 3                                | Nucleus             |
| -6.063  | ENSG00000112782 | CLIC5        | chloride intracellular channel 5                                | Cytoplasm           |
| -8.172  | ENSG00000188603 | CLN3         | CLN3 lysosomal/endosomal transmembrane protein, battenin        | Cytoplasm           |
| -9.282  | ENSG00000172409 | CLP1         | cleavage and polyadenylation factor I subunit 1                 | Nucleus             |
| -8.799  | ENSG00000125656 | CLPP         | caseinolytic mitochondrial matrix peptidase proteolytic subunit | Cytoplasm           |
| -10.832 | ENSG00000070371 | CLTCL1       | clathrin heavy chain like 1                                     | Plasma Membrane     |
| -7.101  | ENSG00000125246 | CLYBL        | citrate lyase beta like                                         | Cytoplasm           |
| -9.672  | ENSG00000174600 | CMKLR1       | chemerin chemokine-like receptor 1                              | Plasma Membrane     |
| -10.409 | ENSG00000134326 | CMPK2        | cytidine/uridine monophosphate kinase 2                         | Cytoplasm           |
| -6.407  | ENSG00000089505 | CMTM1        | CKLF like MARVEL transmembrane domain containing 1              | Other               |
| -10.801 | ENSG00000140931 | CMTM3        | CKLF like MARVEL transmembrane domain containing 3              | Extracellular Space |
| -10.899 | ENSG00000153551 | CMTM7        | CKLF like MARVEL transmembrane domain containing 7              | Extracellular Space |
| -6.466  | ENSG00000170293 | CMTM8        | CKLF like MARVEL transmembrane domain containing 8              | Extracellular Space |
| -9.937  | ENSG00000180917 | CMTR2        | cap methyltransferase 2                                         | Other               |
| -6.485  | ENSG00000143786 | CNIH3        | cornichon family AMPA receptor auxiliary protein 3              | Plasma Membrane     |
| -5.965  | ENSG00000213149 | CNN2P9       | calponin 2 pseudogene 9                                         | Other               |
| -6.583  | ENSG00000273265 | CNNM3-DT     | CNNM3 divergent transcript                                      | Other               |
| -1.765  | ENSG00000125107 | CNOT1        | CCR4-NOT transcription complex subunit 1                        | Cytoplasm           |
| -1.734  | ENSG00000138767 | CNOT6L       | CCR4-NOT transcription complex subunit 6 like                   | Cytoplasm           |
| -2.884  | ENSG00000155508 | CNOT8        | CCR4-NOT transcription complex subunit 8                        | Nucleus             |
| -6.182  | ENSG00000257727 | CNPY2        | canopy FGF signaling regulator 2                                | Plasma Membrane     |
| -8.871  | ENSG00000166997 | CNPY4        | canopy FGF signaling regulator 4                                | Other               |
| -7.098  | ENSG00000188822 | CNR2         | cannabinoid receptor 2                                          | Plasma Membrane     |
| -5.596  | ENSG00000119865 | CNRIP1       | cannabinoid receptor interacting protein 1                      | Extracellular Space |
| -6.744  | ENSG00000242689 | CNTF         | ciliary neurotrophic factor                                     | Extracellular Space |
| -6.607  | ENSG00000108797 | CNTNAP1      | contactin associated protein 1                                  | Plasma Membrane     |
| -7.855  | ENSG00000106714 | CNTNAP3      | contactin associated protein like 3                             | Extracellular Space |
| -2.781  | ENSG00000119397 | CNTRL        | centriolin                                                      | Nucleus             |
| -6.534  | ENSG00000231663 | COA6-AS1     | COA6 antisense RNA 1                                            | Other               |
| -9.042  | ENSG00000168434 | COG7         | component of oligomeric golgi complex 7                         | Cytoplasm           |
| -6.377  | ENSG00000123500 | COL10A1      | collagen type X alpha 1 chain                                   | Extracellular Space |

|         |                 |                   |                                                                       |                     |
|---------|-----------------|-------------------|-----------------------------------------------------------------------|---------------------|
| -9.388  | ENSG00000065618 | COL17A1           | collagen type XVII alpha 1 chain                                      | Extracellular Space |
| -6.889  | ENSG00000082293 | COL19A1           | collagen type XIX alpha 1 chain                                       | Extracellular Space |
| -6.078  | ENSG00000050767 | COL23A1           | collagen type XXIII alpha 1 chain                                     | Plasma Membrane     |
| -6.103  | ENSG00000134871 | COL4A2            | collagen type IV alpha 2 chain                                        | Extracellular Space |
| -5.816  | ENSG00000081052 | COL4A4            | collagen type IV alpha 4 chain                                        | Extracellular Space |
| -6.655  | ENSG00000080573 | COL5A3            | collagen type V alpha 3 chain                                         | Extracellular Space |
| -6.683  | ENSG00000171812 | COL8A2            | collagen type VIII alpha 2 chain                                      | Extracellular Space |
| -6.801  | ENSG00000198756 | COLGALT2          | collagen beta(1-O)galactosyltransferase 2                             | Cytoplasm           |
| -7.802  | ENSG00000148444 | COMMD3            | COMM domain containing 3                                              | Extracellular Space |
| -8.604  | ENSG00000140365 | COMMD4            | COMM domain containing 4                                              | Cytoplasm           |
| -1.805  | ENSG00000143207 | COP1              | COP1 E3 ubiquitin ligase                                              | Cytoplasm           |
| -8.046  | ENSG00000172428 | COP59             | COP9 signalosome subunit 9                                            | Nucleus             |
| -7.393  | ENSG00000135469 | COQ10A            | coenzyme Q10A                                                         | Cytoplasm           |
| -5.849  | ENSG00000103647 | CORO2B            | coronin 2B                                                            | Plasma Membrane     |
| -10.354 | ENSG00000262246 | CORO7/CORO7-PAM16 | coronin 7                                                             | Cytoplasm           |
| -9.063  | ENSG00000006695 | COX10             | cytochrome c oxidase assembly factor heme A:farnesyltransferase COX10 | Cytoplasm           |
| -7.569  | ENSG00000236088 | COX10-AS1         | COX10 antisense RNA 1                                                 | Other               |
| -7.067  | ENSG00000133983 | COX16             | cytochrome c oxidase assembly factor COX16                            | Cytoplasm           |
| -9.179  | ENSG00000163626 | COX18             | cytochrome c oxidase assembly factor COX18                            | Cytoplasm           |
| -9.451  | ENSG00000178741 | COX5A             | cytochrome c oxidase subunit 5A                                       | Cytoplasm           |
| -5.527  | ENSG00000236041 | COX6CP18          | cytochrome c oxidase subunit 6C pseudogene 18                         | Other               |
| -7.036  | ENSG00000176340 | COX8A             | cytochrome c oxidase subunit 8A                                       | Cytoplasm           |
| -8.216  | ENSG00000163751 | CPA3              | carboxypeptidase A3                                                   | Extracellular Space |
| -5.448  | ENSG00000132881 | CPANE2            | ciliogenesis and planar polarity effector 2                           | Cytoplasm           |
| -10.344 | ENSG00000135678 | CPM               | carboxypeptidase M                                                    | Plasma Membrane     |
| -3.847  | ENSG00000085719 | CPNE3             | copine 3                                                              | Cytoplasm           |
| -13.191 | ENSG00000106066 | CPVL              | carboxypeptidase vitellogenic like                                    | Cytoplasm           |
| -6.404  | ENSG00000088882 | CPXM1             | carboxypeptidase X, M14 family member 1                               | Extracellular Space |
| -6.561  | ENSG00000117322 | CR2               | complement C3d receptor 2                                             | Plasma Membrane     |
| -6.327  | ENSG00000213145 | CRIP1             | cysteine rich protein 1                                               | Cytoplasm           |
| -7.975  | ENSG00000109943 | CRTAM             | cytotoxic and regulatory T cell molecule                              | Plasma Membrane     |
| -2.498  | ENSG00000160741 | CRTC2             | CREB regulated transcription coactivator 2                            | Nucleus             |
| -13.25  | ENSG00000182578 | CSF1R             | colony stimulating factor 1 receptor                                  | Plasma Membrane     |
| -11.755 | ENSG00000198223 | CSF2RA            | colony stimulating factor 2 receptor alpha subunit                    | Plasma Membrane     |
| -12.419 | ENSG00000100368 | CSF2RB            | colony stimulating factor 2 receptor beta common subunit              | Plasma Membrane     |
| -5.893  | ENSG00000119535 | CSF3R             | colony stimulating factor 3 receptor                                  | Plasma Membrane     |
| -2.822  | ENSG00000169826 | CSGALNACT2        | chondroitin sulfate N-acetylgalactosaminyltransferase 2               | Cytoplasm           |
| -8.011  | ENSG00000204435 | CSNK2B            | casein kinase 2 beta                                                  | Cytoplasm           |
| -10.176 | ENSG00000121552 | CSTA              | cystatin A                                                            | Cytoplasm           |
| -4.324  | ENSG00000177613 | CSTF2T            | cleavage stimulation factor subunit 2 tau variant                     | Nucleus             |
| -6.428  | ENSG00000259891 | CTA_204B42        | chondroitin sulfate proteoglycan 4 pseudogene 3 Y-linked              | Other               |
| -5.924  | ENSG00000273243 | CTA_217C22        | chondroitin sulfate proteoglycan 4 pseudogene 3 Y-linked              | Other               |
| -6.115  | ENSG00000231466 | CTA_246H311       | chondroitin sulfate proteoglycan 4 pseudogene 3 Y-linked              | Other               |
| -6.973  | ENSG00000226471 | CTA_292E106       | chondroitin sulfate proteoglycan 4 pseudogene 3 Y-linked              | Other               |
| -6.211  | ENSG00000272858 | CTA_292E108       | chondroitin sulfate proteoglycan 4 pseudogene 3 Y-linked              | Other               |
| -6.517  | ENSG00000260708 | CTA_29F111        | chondroitin sulfate proteoglycan 4 pseudogene 3 Y-linked              | Other               |
| -6.91   | ENSG00000260188 | CTA_331P31        | chondroitin sulfate proteoglycan 4 pseudogene 3 Y-linked              | Other               |
| -5.598  | ENSG00000272072 | CTA_363E192       | chondroitin sulfate proteoglycan 4 pseudogene 3 Y-linked              | Other               |
| -4.831  | ENSG00000206028 | CTA_373H77        | chondroitin sulfate proteoglycan 4 pseudogene 3 Y-linked              | Other               |
| -6.012  | ENSG00000272821 | CTA_384D836       | chondroitin sulfate proteoglycan 4 pseudogene 3 Y-linked              | Other               |
| -5.699  | ENSG00000269653 | CTB_102L57        | chondroitin sulfate proteoglycan 4 pseudogene 3 Y-linked              | Other               |
| -5.802  | ENSG00000272112 | CTB_113P195       | chondroitin sulfate proteoglycan 4 pseudogene 3 Y-linked              | Other               |
| -8.78   | ENSG00000269292 | CTB_12A173        | chondroitin sulfate proteoglycan 4 pseudogene 3 Y-linked              | Other               |
| -6.413  | ENSG00000250069 | CTB_131B52        | chondroitin sulfate proteoglycan 4 pseudogene 3 Y-linked              | Other               |
| -10.349 | ENSG00000263264 | CTB_133G61        | chondroitin sulfate proteoglycan 4 pseudogene 3 Y-linked              | Other               |
| -7.116  | ENSG00000272918 | CTB_152G176       | chondroitin sulfate proteoglycan 4 pseudogene 3 Y-linked              | Other               |
| -7.47   | ENSG00000272219 | CTB_181H171       | chondroitin sulfate proteoglycan 4 pseudogene 3 Y-linked              | Other               |
| -6.46   | ENSG00000262380 | CTB_193M123       | chondroitin sulfate proteoglycan 4 pseudogene 3 Y-linked              | Other               |
| -6.723  | ENSG00000267317 | CTB_25B1312       | chondroitin sulfate proteoglycan 4 pseudogene 3 Y-linked              | Other               |
| -8.281  | ENSG00000261596 | CTB_31N193        | chondroitin sulfate proteoglycan 4 pseudogene 3 Y-linked              | Other               |
| -5.154  | ENSG00000266389 | CTB_41I61         | chondroitin sulfate proteoglycan 4 pseudogene 3 Y-linked              | Other               |
| -5.442  | ENSG00000265975 | CTB_41I62         | chondroitin sulfate proteoglycan 4 pseudogene 3 Y-linked              | Other               |
| -4.561  | ENSG00000269374 | CTB_50E145        | chondroitin sulfate proteoglycan 4 pseudogene 3 Y-linked              | Other               |
| -9.506  | ENSG00000268734 | CTB_61M72         | chondroitin sulfate proteoglycan 4 pseudogene 3 Y-linked              | Other               |
| -5.75   | ENSG00000270137 | CTC_137K31        | chondroitin sulfate proteoglycan 4 pseudogene 3 Y-linked              | Other               |
| -5.743  | ENSG00000269246 | CTC_246B1810      | chondroitin sulfate proteoglycan 4 pseudogene 3 Y-linked              | Other               |
| -5.291  | ENSG00000267598 | CTC_250I146       | chondroitin sulfate proteoglycan 4 pseudogene 3 Y-linked              | Other               |
| -7.151  | ENSG00000197813 | CTC_301O74        | chondroitin sulfate proteoglycan 4 pseudogene 3 Y-linked              | Other               |
| -6.062  | ENSG00000249637 | CTC_329D12        | chondroitin sulfate proteoglycan 4 pseudogene 3 Y-linked              | Other               |
| -7.333  | ENSG00000259436 | CTC_378H222       | chondroitin sulfate proteoglycan 4 pseudogene 3 Y-linked              | Other               |
| -6.526  | ENSG00000205041 | CTC_425O232       | chondroitin sulfate proteoglycan 4 pseudogene 3 Y-linked              | Other               |
| -8.2    | ENSG00000267904 | CTC_429P95        | chondroitin sulfate proteoglycan 4 pseudogene 3 Y-linked              | Other               |
| -5.562  | ENSG00000268987 | CTC_435M1010      | chondroitin sulfate proteoglycan 4 pseudogene 3 Y-linked              | Other               |
| -7.169  | ENSG00000268713 | CTC_444N248       | chondroitin sulfate proteoglycan 4 pseudogene 3 Y-linked              | Other               |
| -5.195  | ENSG00000261770 | CTC_459F41        | chondroitin sulfate proteoglycan 4 pseudogene 3 Y-linked              | Other               |
| -5.049  | ENSG00000269069 | CTC_471F35        | chondroitin sulfate proteoglycan 4 pseudogene 3 Y-linked              | Other               |
| -4.895  | ENSG00000260160 | CTC_471J12        | chondroitin sulfate proteoglycan 4 pseudogene 3 Y-linked              | Other               |
| -7.202  | ENSG00000267174 | CTC_510F124       | chondroitin sulfate proteoglycan 4 pseudogene 3 Y-linked              | Other               |
| -6.172  | ENSG00000267474 | CTC_548K166       | chondroitin sulfate proteoglycan 4 pseudogene 3 Y-linked              | Other               |
| -5.028  | ENSG00000267419 | CTC_559E96        | chondroitin sulfate proteoglycan 4 pseudogene 3 Y-linked              | Other               |
| -6.133  | ENSG00000249825 | CTD-220I118.1     | uncharacterized LOC101929215                                          | Other               |
| -5.58   | ENSG00000269001 | CTD-2245F17.3     | chondroitin sulfate proteoglycan 4 pseudogene 3 Y-linked              | Other               |
| -6.059  | ENSG00000269877 | CTD-3022G6.1      | chondroitin sulfate proteoglycan 4 pseudogene 3 Y-linked              | Other               |
| -8.103  | ENSG00000188897 | CTD-3088G3.8      | chondroitin sulfate proteoglycan 4 pseudogene 3 Y-linked              | Other               |
| -6.071  | ENSG00000267274 | CTD_2006C112      | chondroitin sulfate proteoglycan 4 pseudogene 3 Y-linked              | Other               |
| -6.019  | ENSG00000259804 | CTD_2012K147      | chondroitin sulfate proteoglycan 4 pseudogene 3 Y-linked              | Other               |
| -7.792  | ENSG00000268362 | CTD_2017D111      | chondroitin sulfate proteoglycan 4 pseudogene 3 Y-linked              | Other               |
| -7.467  | ENSG00000233175 | CTD_2020K173      | chondroitin sulfate proteoglycan 4 pseudogene 3 Y-linked              | Other               |
| -6.325  | ENSG00000272144 | CTD_2035E115      | chondroitin sulfate proteoglycan 4 pseudogene 3 Y-linked              | Other               |
| -5.626  | ENSG00000260774 | CTD_2083E44       | chondroitin sulfate proteoglycan 4 pseudogene 3 Y-linked              | Other               |
| -6.291  | ENSG00000248791 | CTD_2165H163      | chondroitin sulfate proteoglycan 4 pseudogene 3 Y-linked              | Other               |

|         |                 |               |                                                                 |                     |
|---------|-----------------|---------------|-----------------------------------------------------------------|---------------------|
| -6.29   | ENSG00000253558 | CTD_2179L221  | chondroitin sulfate proteoglycan 4 pseudogene 3 Y-linked        | Other               |
| -7.009  | ENSG00000269693 | CTD_2192J1620 | chondroitin sulfate proteoglycan 4 pseudogene 3 Y-linked        | Other               |
| -6.571  | ENSG00000269560 | CTD_2192J1621 | chondroitin sulfate proteoglycan 4 pseudogene 3 Y-linked        | Other               |
| -7.66   | ENSG00000248734 | CTD_2260A171  | chondroitin sulfate proteoglycan 4 pseudogene 3 Y-linked        | Other               |
| -6.662  | ENSG00000247121 | CTD_2260A172  | chondroitin sulfate proteoglycan 4 pseudogene 3 Y-linked        | Other               |
| -7.196  | ENSG00000266208 | CTD_2267D193  | chondroitin sulfate proteoglycan 4 pseudogene 3 Y-linked        | Other               |
| -5.842  | ENSG00000267655 | CTD_2286N82   | chondroitin sulfate proteoglycan 4 pseudogene 3 Y-linked        | Other               |
| -6.646  | ENSG00000271918 | CTD_2287O165  | chondroitin sulfate proteoglycan 4 pseudogene 3 Y-linked        | Other               |
| -5.571  | ENSG00000258768 | CTD_2292M168  | chondroitin sulfate proteoglycan 4 pseudogene 3 Y-linked        | Other               |
| -6.646  | ENSG00000240729 | CTD_2301A43   | chondroitin sulfate proteoglycan 4 pseudogene 3 Y-linked        | Other               |
| -5.825  | ENSG00000260361 | CTD_2313J175  | chondroitin sulfate proteoglycan 4 pseudogene 3 Y-linked        | Other               |
| -6.427  | ENSG00000260269 | CTD_2323K181  | chondroitin sulfate proteoglycan 4 pseudogene 3 Y-linked        | Other               |
| -5.492  | ENSG00000272234 | CTD_2325A155  | chondroitin sulfate proteoglycan 4 pseudogene 3 Y-linked        | Other               |
| -6.249  | ENSG00000255182 | CTD_2517M2214 | chondroitin sulfate proteoglycan 4 pseudogene 3 Y-linked        | Other               |
| -6.382  | ENSG00000254826 | CTD_2530H122  | chondroitin sulfate proteoglycan 4 pseudogene 3 Y-linked        | Other               |
| -6.429  | ENSG00000267096 | CTD_2537I913  | chondroitin sulfate proteoglycan 4 pseudogene 3 Y-linked        | Other               |
| -6.548  | ENSG00000267475 | CTD_2538C12   | chondroitin sulfate proteoglycan 4 pseudogene 3 Y-linked        | Other               |
| -7.056  | ENSG00000258875 | CTD_2547L243  | chondroitin sulfate proteoglycan 4 pseudogene 3 Y-linked        | Other               |
| -4.837  | ENSG00000272909 | CTD_2555O164  | chondroitin sulfate proteoglycan 4 pseudogene 3 Y-linked        | Other               |
| -5.911  | ENSG00000213976 | CTD_2561J222  | chondroitin sulfate proteoglycan 4 pseudogene 3 Y-linked        | Other               |
| -6.086  | ENSG00000268520 | CTD_2616J1110 | chondroitin sulfate proteoglycan 4 pseudogene 3 Y-linked        | Other               |
| -5.56   | ENSG00000268889 | CTD_2616J1114 | chondroitin sulfate proteoglycan 4 pseudogene 3 Y-linked        | Other               |
| -6.75   | ENSG00000254760 | CTD_2616J113  | chondroitin sulfate proteoglycan 4 pseudogene 3 Y-linked        | Other               |
| -5.612  | ENSG00000268049 | CTD_2619J139  | chondroitin sulfate proteoglycan 4 pseudogene 3 Y-linked        | Other               |
| -8.045  | ENSG00000268670 | CTD_2622I133  | chondroitin sulfate proteoglycan 4 pseudogene 3 Y-linked        | Other               |
| -6.109  | ENSG00000234773 | CTD_2666L211  | chondroitin sulfate proteoglycan 4 pseudogene 3 Y-linked        | Other               |
| -5.715  | ENSG00000271959 | CTD_3064M37   | chondroitin sulfate proteoglycan 4 pseudogene 3 Y-linked        | Other               |
| -5.942  | ENSG00000267990 | CTD_3187F815  | chondroitin sulfate proteoglycan 4 pseudogene 3 Y-linked        | Other               |
| -6.232  | ENSG00000268204 | CTD_3214H196  | chondroitin sulfate proteoglycan 4 pseudogene 3 Y-linked        | Other               |
| -6.783  | ENSG00000240808 | CTD_3236F51   | chondroitin sulfate proteoglycan 4 pseudogene 3 Y-linked        | Other               |
| -6.187  | ENSG00000116761 | CTH           | cystathionine gamma-lyase                                       | Cytoplasm           |
| -8.751  | ENSG00000163599 | CTLA4         | cytotoxic T-lymphocyte associated protein 4                     | Plasma Membrane     |
| -3.355  | ENSG00000117984 | CTSD          | cathepsin D                                                     | Cytoplasm           |
| -8.373  | ENSG00000196188 | CTSE          | cathepsin E                                                     | Cytoplasm           |
| -10.684 | ENSG00000100448 | CTSG          | cathepsin G                                                     | Cytoplasm           |
| -14.823 | ENSG00000163131 | CTSS          | cathepsin S                                                     | Cytoplasm           |
| -7.022  | ENSG00000174177 | CTU2          | cytosolic thiouridylase subunit 2                               | Cytoplasm           |
| -8.534  | ENSG00000107611 | CUBN          | cubilin                                                         | Plasma Membrane     |
| -10.424 | ENSG00000095485 | CWF19L1       | CWF19 like cell cycle control factor 1                          | Other               |
| -12.607 | ENSG00000168329 | CX3CR1        | C-X3-C motif chemokine receptor 1                               | Plasma Membrane     |
| -8.95   | ENSG00000163464 | CXCR1         | C-X-C motif chemokine receptor 1                                | Plasma Membrane     |
| -10.129 | ENSG00000180871 | CXCR2         | C-X-C motif chemokine receptor 2                                | Plasma Membrane     |
| -8.22   | ENSG00000186810 | CXCR3         | C-X-C motif chemokine receptor 3                                | Plasma Membrane     |
| -7.473  | ENSG00000160683 | CXCR5         | C-X-C motif chemokine receptor 5                                | Plasma Membrane     |
| -6.262  | ENSG00000172215 | CXCR6         | C-X-C motif chemokine receptor 6                                | Plasma Membrane     |
| -9.408  | ENSG00000120280 | CXorf21       | chromosome X open reading frame 21                              | Other               |
| -8.015  | ENSG00000204165 | CXorf65       | chromosome X open reading frame 65                              | Other               |
| -7.76   | ENSG00000114395 | CYB561D2      | cytochrome b561 family member D2                                | Cytoplasm           |
| -4.929  | ENSG00000271858 | CYB561D2      | cytochrome b561 family member D2                                | Cytoplasm           |
| -7.181  | ENSG00000215883 | CYB5RL        | cytochrome b5 reductase like                                    | Nucleus             |
| -15.962 | ENSG00000165168 | CYBB          | cytochrome b-245 beta chain                                     | Cytoplasm           |
| -2.488  | ENSG00000178927 | CYBC1         | cytochrome b-245 chaperone 1                                    | Cytoplasm           |
| -11.022 | ENSG00000071967 | CYBRD1        | cytochrome b reductase 1                                        | Cytoplasm           |
| -4.841  | ENSG00000055163 | CYFIP2        | cytoplasmic FMR1 interacting protein 2                          | Cytoplasm           |
| -9.792  | ENSG00000135929 | CYP27A1       | cytochrome P450 family 27 subfamily A member 1                  | Cytoplasm           |
| -7.161  | ENSG00000205702 | CYP2D7        | cytochrome P450 family 2 subfamily D member 7 (gene/pseudogene) | Other               |
| -7.182  | ENSG00000226450 | CYP2D8P       | cytochrome P450 family 2 subfamily D member 8, pseudogene       | Other               |
| -7.625  | ENSG00000167600 | CYP2S1        | cytochrome P450 family 2 subfamily S member 1                   | Cytoplasm           |
| -6.203  | ENSG00000233622 | CYP2T1P       | cytochrome P450 family 2 subfamily T member 1, pseudogene       | Other               |
| -6.852  | ENSG00000155016 | CYP2U1        | cytochrome P450 family 2 subfamily U member 1                   | Cytoplasm           |
| -6.174  | ENSG00000267241 | CYP4F10P      | cytochrome P450 family 4 subfamily F member 10, pseudogene      | Other               |
| -6.963  | ENSG00000186204 | CYP4F12       | cytochrome P450 family 4 subfamily F member 12                  | Cytoplasm           |
| -7.17   | ENSG00000171954 | CYP4F22       | cytochrome P450 family 4 subfamily F member 22                  | Extracellular Space |
| -11.94  | ENSG00000186529 | CYP4F3        | cytochrome P450 family 4 subfamily F member 3                   | Cytoplasm           |
| -4.358  | ENSG00000145476 | CYP4V2        | cytochrome P450 family 4 subfamily V member 2                   | Cytoplasm           |
| -5.436  | ENSG00000001630 | CYP51A1       | cytochrome P450 family 51 subfamily A member 1                  | Cytoplasm           |
| -9.251  | ENSG00000173198 | CYSLTR1       | cysteinyl leukotriene receptor 1                                | Plasma Membrane     |
| -8.107  | ENSG00000152207 | CYSLTR2       | cysteinyl leukotriene receptor 2                                | Plasma Membrane     |
| -12.839 | ENSG00000100055 | CYTH4         | cytohesin 4                                                     | Cytoplasm           |
| -13.424 | ENSG00000115165 | CYTIIP        | cytohesin 1 interacting protein                                 | Cytoplasm           |
| -7.653  | ENSG00000166265 | CYR1          | cysteine and tyrosine rich 1                                    | Other               |
| -8.589  | ENSG00000162384 | CZIB          | CXXC motif containing zinc binding protein                      | Cytoplasm           |
| -8.859  | ENSG00000146122 | DAAM2         | dishevelled associated activator of morphogenesis 2             | Cytoplasm           |
| -7.404  | ENSG00000165617 | DACT1         | dishevelled binding antagonist of beta catenin 1                | Cytoplasm           |
| -8.201  | ENSG00000226950 | DANCR         | differentiation antagonizing non-protein coding RNA             | Other               |
| -2.23   | ENSG00000183283 | DAZAP2        | DAZ associated protein 2                                        | Nucleus             |
| -6.537  | ENSG00000259378 | DCAF13P3      | DDB1 and CUL4 associated factor 13 pseudogene 3                 | Other               |
| -4.423  | ENSG00000119599 | DCAF4         | DDB1 and CUL4 associated factor 4                               | Nucleus             |
| -8.058  | ENSG00000164465 | DCBLD1        | discoidin, CUB and LCCL domain containing 1                     | Extracellular Space |
| -8.214  | ENSG00000166341 | DCHS1         | dachsous cadherin-related 1                                     | Plasma Membrane     |
| -9.03   | ENSG00000151065 | DCP1B         | decapping mRNA 1B                                               | Cytoplasm           |
| -8.032  | ENSG00000110063 | DCPS          | decapping enzyme, scavenger                                     | Nucleus             |
| -6.806  | ENSG00000203797 | DDO           | D-aspartate oxidase                                             | Cytoplasm           |
| -8.833  | ENSG00000099977 | DDT           | D-dopachrome tautomerase                                        | Cytoplasm           |
| -6.044  | ENSG00000236397 | DDX11L2       | DEAD/H-box helicase 11 like 2                                   | Other               |
| -8.063  | ENSG00000214826 | DDX12P        | DEAD/H-box helicase 12, pseudogene                              | Other               |
| -3.116  | ENSG00000157349 | DDX19B        | DEAD-box helicase 19B                                           | Nucleus             |
| -6.859  | ENSG00000080007 | DDX43         | DEAD-box helicase 43                                            | Other               |
| -7.5    | ENSG00000229816 | DDX50P1       | DEAD-box helicase 50 pseudogene 1                               | Other               |
| -6.912  | ENSG00000181381 | DDX60L        | DEAD/H-box 60 like                                              | Other               |
| -9.926  | ENSG00000177030 | DEAF1         | DEAF1 transcription factor                                      | Nucleus             |



|         |                 |                         |                                                                  |                     |
|---------|-----------------|-------------------------|------------------------------------------------------------------|---------------------|
| -6.282  | ENSG00000242612 | DECR2                   | 2,4-dienoyl-CoA reductase 2                                      | Cytoplasm           |
| -7.431  | ENSG0000023892  | DEF6                    | DEF6 guanine nucleotide exchange factor                          | Extracellular Space |
| -13.491 | ENSG00000239839 | DEFA1 (includes others) | defensin alpha 1                                                 | Cytoplasm           |
| -10.872 | ENSG00000164821 | DEFA4                   | defensin alpha 4                                                 | Extracellular Space |
| -7.301  | ENSG00000223629 | DEFA8P                  | defensin alpha 8, pseudogene                                     | Other               |
| -11.918 | ENSG00000205744 | DENN1C                  | DENN domain containing 1C                                        | Cytoplasm           |
| -7.849  | ENSG00000035499 | DEPDC1B                 | DEP domain containing 1B                                         | Cytoplasm           |
| -5.652  | ENSG00000100150 | DEPDC5                  | DEP domain containing 5                                          | Cytoplasm           |
| -6.951  | ENSG00000099958 | DERL3                   | derlin 3                                                         | Cytoplasm           |
| -6.119  | ENSG00000140543 | DET1                    | DET1 partner of COP1 E3 ubiquitin ligase                         | Nucleus             |
| -7.894  | ENSG00000273311 | DGCR11                  | DiGeorge syndrome critical region gene 11                        | Other               |
| -6.715  | ENSG00000183628 | DGCR6                   | DiGeorge syndrome critical region gene 6                         | Nucleus             |
| -8.585  | ENSG00000128185 | DGCR6L                  | DiGeorge syndrome critical region gene 6 like                    | Nucleus             |
| -12.183 | ENSG00000065357 | DGKA                    | diacylglycerol kinase alpha                                      | Cytoplasm           |
| -9.421  | ENSG00000228716 | DHFR                    | dihydrofolate reductase                                          | Nucleus             |
| -8.949  | ENSG00000157379 | DHRS1                   | dehydrogenase/reductase 1                                        | Cytoplasm           |
| -8.631  | ENSG00000157326 | DHRS4                   | dehydrogenase/reductase 4                                        | Cytoplasm           |
| -8.538  | ENSG00000073737 | DHRS9                   | dehydrogenase/reductase 9                                        | Cytoplasm           |
| -9.098  | ENSG00000169084 | DHRSX                   | dehydrogenase/reductase X-linked                                 | Extracellular Space |
| -1.582  | ENSG00000174953 | DHX36                   | DEAH-box helicase 36                                             | Cytoplasm           |
| -6.032  | ENSG00000231672 | DIRC3                   | disrupted in renal carcinoma 3                                   | Other               |
| -10.099 | ENSG00000162946 | DISC1                   | DISC1 scaffold protein                                           | Cytoplasm           |
| -6.32   | ENSG00000226758 | DISC1-IT1               | DISC1 intronic transcript 1                                      | Other               |
| -7.039  | ENSG00000154309 | DISP1                   | dispatched RND transporter family member 1                       | Plasma Membrane     |
| -5.855  | ENSG00000228106 | DISP1                   | dispatched RND transporter family member 1                       | Plasma Membrane     |
| -7.558  | ENSG0000008226  | DLEC1                   | DLEC1 cilia and flagella associated protein                      | Cytoplasm           |
| -7.185  | ENSG00000186047 | DLEU7                   | deleted in lymphocytic leukemia 7                                | Other               |
| -6.984  | ENSG00000262001 | DLGAP1-AS2              | DLGAP1 antisense RNA 2                                           | Other               |
| -6.64   | ENSG00000116544 | DLGAP3                  | DLG associated protein 3                                         | Cytoplasm           |
| -6.109  | ENSG00000232907 | DLGAP4-AS1              | DLGAP4 antisense RNA 1                                           | Other               |
| -6.169  | ENSG00000100206 | DMC1                    | DNA meiotic recombinase 1                                        | Nucleus             |
| -1.591  | ENSG00000135164 | DMTF1                   | cyclin D binding myb like transcription factor 1                 | Nucleus             |
| -8.82   | ENSG00000138346 | DNA2                    | DNA replication helicase/nuclease 2                              | Cytoplasm           |
| -3.535  | ENSG00000114841 | DNAH1                   | dynein axonemal heavy chain 1                                    | Extracellular Space |
| -8.404  | ENSG00000197653 | DNAH10                  | dynein axonemal heavy chain 10                                   | Cytoplasm           |
| -4.865  | ENSG00000242049 | DNAJB8-AS1              | DNAJB8 antisense RNA 1                                           | Other               |
| -6.871  | ENSG00000170464 | DNAJC18                 | Dnaj heat shock protein family (Hsp40) member C18                | Other               |
| -7.178  | ENSG00000225808 | DNAJC19P5               | Dnaj heat shock protein family (Hsp40) member C19 pseudogene 5   | Other               |
| -8.706  | ENSG00000170946 | DNAJC24                 | Dnaj heat shock protein family (Hsp40) member C24                | Other               |
| -6.294  | ENSG00000247400 | DNAJC3-DT               | DNAJC3 divergent transcript                                      | Other               |
| -4.165  | ENSG00000182397 | DNM1P46                 | dynamin 1 pseudogene 46                                          | Other               |
| -6.548  | ENSG00000259660 | DNM1P47                 | dynamin 1 pseudogene 47                                          | Other               |
| -13.972 | ENSG00000134516 | DOCK2                   | dedicator of cytokinesis 2                                       | Cytoplasm           |
| -7.428  | ENSG00000088538 | DOCK3                   | dedicator of cytokinesis 3                                       | Cytoplasm           |
| -5.649  | ENSG00000107099 | DOCK8                   | dedicator of cytokinesis 8                                       | Cytoplasm           |
| -8.122  | ENSG00000159147 | DONSON                  | downstream neighbor of SON                                       | Extracellular Space |
| -5.308  | ENSG00000141096 | DPEP3                   | dipeptidase 3                                                    | Other               |
| -8.606  | ENSG00000108963 | DPH1                    | diphthamide biosynthesis 1                                       | Cytoplasm           |
| -3.267  | ENSG00000148399 | DPH7                    | diphthamide biosynthesis 7                                       | Cytoplasm           |
| -6.352  | ENSG00000121570 | DPPA4                   | developmental pluripotency associated 4                          | Nucleus             |
| -7.64   | ENSG00000264743 | DPRX4                   | divergent-paired related homeobox pseudogene 4                   | Other               |
| -6.882  | ENSG00000170629 | DPY19L2P2               | DPY19L2 pseudogene 2                                             | Other               |
| -8.426  | ENSG00000162961 | DPY30                   | dpy-30 histone methyltransferase complex regulatory subunit      | Nucleus             |
| -3.759  | ENSG00000188641 | DPYD                    | dihydropyrimidine dehydrogenase                                  | Cytoplasm           |
| -5.472  | ENSG00000232542 | DPYD-IT1                | DPYD intronic transcript 1                                       | Other               |
| -4.106  | ENSG00000092964 | DPYSL2                  | dihydropyrimidinase like 2                                       | Cytoplasm           |
| -7.551  | ENSG00000162490 | DRAXIN                  | dorsal inhibitory axon guidance protein                          | Extracellular Space |
| -5.842  | ENSG00000134765 | DSC1                    | desmocollin 1                                                    | Plasma Membrane     |
| -6.659  | ENSG00000136982 | DSCC1                   | DNA replication and sister chromatid cohesion 1                  | Nucleus             |
| -7.4    | ENSG00000129480 | DTD2                    | D-tyrosyl-tRNA deacylase 2 (putative)                            | Other               |
| -9.356  | ENSG00000197057 | DTHD1                   | death domain containing 1                                        | Other               |
| -8.13   | ENSG00000143476 | DTL                     | denticleless E3 ubiquitin protein ligase homolog                 | Nucleus             |
| -5.843  | ENSG00000135144 | DTX1                    | deltex E3 ubiquitin ligase 1                                     | Nucleus             |
| -7.862  | ENSG00000186704 | DTX2P1                  | chondroitin sulfate proteoglycan 4 pseudogene 3 Y-linked         | Other               |
| -7.466  | ENSG00000168393 | DTYMK                   | deoxythymidylate kinase                                          | Cytoplasm           |
| -8.387  | ENSG00000105865 | DUS4L                   | dihydrouridine synthase 4 like                                   | Other               |
| -5.609  | ENSG00000144048 | DUSP11                  | dual specificity phosphatase 11                                  | Nucleus             |
| -8.699  | ENSG00000081721 | DUSP12                  | dual specificity phosphatase 12                                  | Nucleus             |
| -8.357  | ENSG00000188542 | DUSP28                  | dual specificity phosphatase 28                                  | Other               |
| -4.245  | ENSG00000004975 | DVL2                    | dishevelled segment polarity protein 2                           | Cytoplasm           |
| -7.695  | ENSG00000204348 | DXO                     | decapping exoribonuclease                                        | Nucleus             |
| -5.927  | ENSG00000138036 | DYNC2L1                 | dynein cytoplasmic 2 light intermediate chain 1                  | Cytoplasm           |
| -8.337  | ENSG0000010219  | DYRK4                   | dual specificity tyrosine phosphorylation regulated kinase 4     | Nucleus             |
| -5.372  | ENSG00000198919 | DZIP3                   | DAZ interacting zinc finger protein 3                            | Cytoplasm           |
| -5.859  | ENSG00000224707 | E2F3-IT1                | E2F3 intronic transcript 1                                       | Other               |
| -6.546  | ENSG00000165891 | E2F7                    | E2F transcription factor 7                                       | Nucleus             |
| -8.227  | ENSG00000129173 | E2F8                    | E2F transcription factor 8                                       | Nucleus             |
| -6.464  | ENSG00000164330 | EBF1                    | EBF transcription factor 1                                       | Nucleus             |
| -7.957  | ENSG00000255423 | EBLN2                   | endogenous Bornavirus like nucleoprotein 2                       | Other               |
| -6.695  | ENSG00000093144 | ECHDC1                  | ethylmalonyl-CoA decarboxylase 1                                 | Cytoplasm           |
| -6.273  | ENSG00000135960 | EDAR                    | ectodysplasin A receptor                                         | Plasma Membrane     |
| -10.415 | ENSG00000088298 | EDEM2                   | ER degradation enhancing alpha-mannosidase like protein 2        | Cytoplasm           |
| -2.011  | ENSG00000156508 | EEF1A1                  | eukaryotic translation elongation factor 1 alpha 1               | Cytoplasm           |
| -5.71   | ENSG00000237757 | EEF1A1P30               | eukaryotic translation elongation factor 1 alpha 1 pseudogene 30 | Other               |
| -2.546  | ENSG00000196205 | EEF1A1P5                | eukaryotic translation elongation factor 1 alpha 1 pseudogene 5  | Extracellular Space |
| -4.263  | ENSG00000233476 | EEF1A1P6                | eukaryotic translation elongation factor 1 alpha 1 pseudogene 6  | Other               |
| -5.851  | ENSG00000123427 | EEF1AKMT3               | EEF1A lysine methyltransferase 3                                 | Cytoplasm           |
| -5.444  | ENSG00000226721 | EEF1DP2                 | eukaryotic translation elongation factor 1 delta pseudogene 2    | Other               |
| -9.071  | ENSG00000229715 | EEF1DP3                 | eukaryotic translation elongation factor 1 delta pseudogene 3    | Other               |
| -8.323  | ENSG00000263883 | EEF1DP7                 | eukaryotic translation elongation factor 1 delta pseudogene 7    | Other               |
| -7.321  | ENSG00000124802 | EEF1E1                  | eukaryotic translation elongation factor 1 epsilon 1             | Cytoplasm           |

|         |                 |                 |                                                                      |                     |
|---------|-----------------|-----------------|----------------------------------------------------------------------|---------------------|
| -6.063  | ENSG00000140025 | EFCAB11         | EF-hand calcium binding domain 11                                    | Other               |
| -2.169  | ENSG00000159658 | EFCAB14         | EF-hand calcium binding domain 14                                    | Other               |
| -5.981  | ENSG00000176927 | EFCAB5          | EF-hand calcium binding domain 5                                     | Other               |
| -7.045  | ENSG00000203965 | EFCAB7          | EF-hand calcium binding domain 7                                     | Extracellular Space |
| -5.835  | ENSG00000215529 | EFCAB8          | EF-hand calcium binding domain 8                                     | Other               |
| -6.954  | ENSG00000172638 | EFEMP2          | EGF containing fibulin extracellular matrix protein 2                | Extracellular Space |
| -7.454  | ENSG00000096093 | EFHC1           | EF-hand domain containing 1                                          | Cytoplasm           |
| -2.816  | ENSG00000132294 | EFR3A           | EFR3 homolog A                                                       | Plasma Membrane     |
| -2.41   | ENSG00000173442 | EHPB1L1         | EH domain binding protein 1 like 1                                   | Other               |
| -5.894  | ENSG00000176401 | EID2B           | EP300 interacting inhibitor of differentiation 2B                    | Nucleus             |
| -4.123  | ENSG00000144895 | EIF2A           | eukaryotic translation initiation factor 2A                          | Cytoplasm           |
| -6.304  | ENSG00000234028 | EIF2AK3-DT      | EIF2AK3 divergent transcript                                         | Other               |
| -3.31   | ENSG00000180574 | EIF2S3B         | eukaryotic translation initiation factor 2 subunit gamma B           | Other               |
| -7.97   | ENSG00000179523 | EIF3J-DT        | EIF3J divergent transcript                                           | Other               |
| -10.044 | ENSG00000161960 | EIF4A1          | eukaryotic translation initiation factor 4A1                         | Cytoplasm           |
| -2.9    | ENSG00000197258 | EIF4BP6         | eukaryotic translation initiation factor 4B pseudogene 6             | Other               |
| -5.38   | ENSG00000224885 | EIPR1-IT1       | EIPR1 intronic transcript 1                                          | Other               |
| -11.26  | ENSG00000197561 | ELANE           | elastase, neutrophil expressed                                       | Extracellular Space |
| -7.237  | ENSG00000102890 | ELMO3           | engulfment and cell motility 3                                       | Cytoplasm           |
| -9.127  | ENSG00000115459 | ELMOD3          | ELMO domain containing 3                                             | Other               |
| -5.998  | ENSG00000236810 | ELOA-AS1        | ELOA antisense RNA 1                                                 | Other               |
| -9.147  | ENSG00000170291 | ELP5            | elongator acetyltransferase complex subunit 5                        | Cytoplasm           |
| -4.608  | ENSG00000170571 | EMB             | embigin                                                              | Plasma Membrane     |
| -7.021  | ENSG00000231752 | EMBP1           | embigin pseudogene 1                                                 | Other               |
| -6.589  | ENSG00000230424 | EMC1-AS1        | EMC1 antisense RNA 1                                                 | Other               |
| -8.277  | ENSG00000180385 | EMC3-AS1        | EMC3 antisense RNA 1                                                 | Other               |
| -9.659  | ENSG00000127774 | EMC6            | ER membrane protein complex subunit 6                                | Cytoplasm           |
| -9.474  | ENSG00000131148 | EMC8            | ER membrane protein complex subunit 8                                | Cytoplasm           |
| -5.504  | ENSG00000100908 | EMC9            | ER membrane protein complex subunit 9                                | Plasma Membrane     |
| -4.437  | ENSG00000154920 | EME1            | essential meiotic structure-specific endonuclease 1                  | Nucleus             |
| -6.096  | ENSG00000186998 | EMID1           | EMI domain containing 1                                              | Extracellular Space |
| -13.619 | ENSG00000132205 | EMILIN2         | elastin microfibril interfacier 2                                    | Extracellular Space |
| -10.819 | ENSG00000149499 | EML3            | EMAP like 3                                                          | Other               |
| -8.015  | ENSG00000165521 | EML5            | EMAP like 5                                                          | Cytoplasm           |
| -7.166  | ENSG00000173818 | ENDOV           | endonuclease V                                                       | Cytoplasm           |
| -9.591  | ENSG00000106991 | ENG             | endoglin                                                             | Plasma Membrane     |
| -7.935  | ENSG00000124074 | ENKD1           | enkurin domain containing 1                                          | Cytoplasm           |
| -4.676  | ENSG00000154269 | ENPP3           | ectonucleotide pyrophosphatase/phosphodiesterase 3                   | Plasma Membrane     |
| -6.259  | ENSG00000112796 | ENPP5           | ectonucleotide pyrophosphatase/phosphodiesterase 5 (putative)        | Extracellular Space |
| -12.578 | ENSG00000138185 | ENTPD1          | ectonucleoside triphosphate diphosphohydrolase 1                     | Plasma Membrane     |
| -5.831  | ENSG00000223797 | ENTPD3-AS1      | ENTPD3 antisense RNA 1                                               | Other               |
| -2.381  | ENSG00000197217 | ENTPD4          | ectonucleoside triphosphate diphosphohydrolase 4                     | Cytoplasm           |
| -9.609  | ENSG00000163508 | EOMES           | eomesodermin                                                         | Nucleus             |
| -8.718  | ENSG00000129595 | EPB41L4A        | erythrocyte membrane protein band 4.1 like 4A                        | Extracellular Space |
| -7.379  | ENSG00000229153 | EPHA1-AS1       | EPHA1 antisense RNA 1                                                | Other               |
| -5.877  | ENSG00000154928 | EPHB1           | EPH receptor B1                                                      | Plasma Membrane     |
| -9.139  | ENSG00000104884 | ERCC2           | ERCC excision repair 2, TFIIH core complex helicase subunit          | Nucleus             |
| -5.764  | ENSG00000186871 | ERCC6L          | ERCC excision repair 6 like, spindle assembly checkpoint helicase    | Nucleus             |
| -6.262  | ENSG00000178752 | ERFE            | erythroferrone                                                       | Extracellular Space |
| -10.297 | ENSG00000157554 | ERG             | ETS transcription factor ERG                                         | Nucleus             |
| -7.651  | ENSG00000133935 | ERG28           | ergosterol biosynthesis 28 homolog                                   | Cytoplasm           |
| -8.752  | ENSG00000136541 | ERMN            | ermin                                                                | Extracellular Space |
| -9.081  | ENSG00000139055 | ERP27           | endoplasmic reticulum protein 27                                     | Other               |
| -6.435  | ENSG00000171320 | ESCO2           | establishment of sister chromatid cohesion N-acetyltransferase 2     | Nucleus             |
| -5.866  | ENSG00000164283 | ESM1            | endothelial cell specific molecule 1                                 | Extracellular Space |
| -7.86   | ENSG00000135476 | ESPL1           | extra spindle pole bodies like 1, separate                           | Nucleus             |
| -6.449  | ENSG00000091831 | ESR1            | estrogen receptor 1                                                  | Nucleus             |
| -6.64   | ENSG00000139160 | ETFBKMT         | electron transfer flavoprotein subunit beta lysine methyltransferase | Cytoplasm           |
| -6.679  | ENSG00000134954 | ETS1            | ETS proto-oncogene 1, transcription factor                           | Nucleus             |
| -8.458  | ENSG00000166979 | EVA1C           | eva-1 homolog C                                                      | Other               |
| -6.538  | ENSG00000173040 | EVC2            | Evc ciliary complex subunit 2                                        | Extracellular Space |
| -10.88  | ENSG00000126860 | EVI2A           | ecotropic viral integration site 2A                                  | Plasma Membrane     |
| -14.234 | ENSG00000185862 | EVI2B           | ecotropic viral integration site 2B                                  | Plasma Membrane     |
| -6.778  | ENSG00000174371 | EXO1            | exonuclease 1                                                        | Nucleus             |
| -4.674  | ENSG00000179044 | EXOC3L1         | exocyst complex component 3 like 1                                   | Cytoplasm           |
| -9.323  | ENSG00000171311 | EXOSC1          | exosome component 1                                                  | Nucleus             |
| -9.175  | ENSG00000107371 | EXOSC3          | exosome component 3                                                  | Nucleus             |
| -7.49   | ENSG00000077348 | EXOSC5          | exosome component 5                                                  | Nucleus             |
| -8.488  | ENSG00000123737 | EXOSC9          | exosome component 9                                                  | Nucleus             |
| -7.305  | ENSG00000162694 | EXTL2           | exostosin like glycosyltransferase 2                                 | Cytoplasm           |
| -6.479  | ENSG00000012232 | EXTL3           | exostosin like glycosyltransferase 3                                 | Cytoplasm           |
| -6.07   | ENSG00000131187 | F12             | coagulation factor XII                                               | Extracellular Space |
| -7.206  | ENSG00000232022 | FAAHP1          | fatty acid amide hydrolase pseudogene 1                              | Other               |
| -5.512  | ENSG00000131944 | FAAP24          | FA core complex associated protein 24                                | Nucleus             |
| -8.289  | ENSG00000182518 | FAM104B         | family with sequence similarity 104 member B                         | Other               |
| -6.754  | ENSG00000273018 | FAM106A         | family with sequence similarity 106 member A                         | Other               |
| -6.973  | ENSG00000245571 | FAM111A-DT      | FAM111A divergent transcript                                         | Other               |
| -9.474  | ENSG00000167483 | FAM129C         | family with sequence similarity 129 member C                         | Other               |
| -7.087  | ENSG00000182230 | FAM153A/FAM153B | family with sequence similarity 153 member B                         | Other               |
| -7.213  | ENSG00000170074 | FAM153A/FAM153B | family with sequence similarity 153 member B                         | Other               |
| -6.097  | ENSG00000179304 | FAM156A/FAM156B | family with sequence similarity 156 member A                         | Nucleus             |
| -7.853  | ENSG00000233013 | FAM157A/FAM157B | family with sequence similarity 157 member A                         | Other               |
| -7.613  | ENSG00000236438 | FAM157A/FAM157B | family with sequence similarity 157 member A                         | Other               |
| -9.496  | ENSG00000158863 | FAM160B2        | family with sequence similarity 160 member B2                        | Other               |
| -7.202  | ENSG00000156050 | FAM161B         | FAM161 centrosomal protein B                                         | Cytoplasm           |
| -5.491  | ENSG00000144369 | FAM171B         | family with sequence similarity 171 member B                         | Other               |
| -5.797  | ENSG00000214439 | FAM185B         | family with sequence similarity 185, member A pseudogene             | Other               |
| -7.938  | ENSG00000248429 | FAM198B-AS1     | FAM198B antisense RNA 1                                              | Other               |
| -5.176  | ENSG00000237765 | FAM200B         | family with sequence similarity 200 member B                         | Other               |
| -5.424  | ENSG00000204860 | FAM201A         | family with sequence similarity 201 member A                         | Other               |
| -5.709  | ENSG00000124103 | FAM209A         | family with sequence similarity 209 member A                         | Other               |

|         |                 |               |                                                         |                     |
|---------|-----------------|---------------|---------------------------------------------------------|---------------------|
| -8.349  | ENSG00000108950 | FAM20A        | FAM20A golgi associated secretory pathway pseudokinase  | Extracellular Space |
| -7.716  | ENSG00000204856 | FAM216A       | family with sequence similarity 216 member A            | Other               |
| -7.173  | ENSG00000178397 | FAM220A       | family with sequence similarity 220 member A            | Nucleus             |
| -7.697  | ENSG00000233261 | FAM238A       | family with sequence similarity 238 member A            | Other               |
| -4.79   | ENSG00000221930 | FAM45BP       | family with sequence similarity 45, member A pseudogene | Other               |
| -4.131  | ENSG00000153310 | FAM49B        | family with sequence similarity 49 member B             | Extracellular Space |
| -4.419  | ENSG00000189319 | FAM53B        | family with sequence similarity 53 member B             | Nucleus             |
| -6.394  | ENSG00000196550 | FAM72A        | family with sequence similarity 72 member A             | Cytoplasm           |
| -6.157  | ENSG00000188610 | FAM72B        | family with sequence similarity 72 member B             | Cytoplasm           |
| -5.986  | ENSG0000009780  | FAM76A        | family with sequence similarity 76 member A             | Nucleus             |
| -7.445  | ENSG00000147689 | FAM83A        | family with sequence similarity 83 member A             | Other               |
| -5.331  | ENSG00000105523 | FAM83E        | family with sequence similarity 83 member E             | Other               |
| -5.757  | ENSG00000173295 | FAM86B3P      | family with sequence similarity 86, member A pseudogene | Other               |
| -6.936  | ENSG00000244026 | FAM86DP       | family with sequence similarity 86 member D, pseudogene | Other               |
| -7.424  | ENSG00000182118 | FAM89A        | family with sequence similarity 89 member A             | Other               |
| -7.501  | ENSG00000176973 | FAM89B        | family with sequence similarity 89 member B             | Cytoplasm           |
| -5.721  | ENSG00000188343 | FAM92A        | family with sequence similarity 92 member A             | Cytoplasm           |
| -9.262  | ENSG00000187741 | FANCA         | FA complementation group A                              | Nucleus             |
| -9.845  | ENSG00000144554 | FANCD2        | FA complementation group D2                             | Nucleus             |
| -7.167  | ENSG00000112039 | FANCE         | FA complementation group E                              | Nucleus             |
| -7.797  | ENSG00000254791 | FAR1-IT1      | FAR1 intronic transcript 1                              | Other               |
| -10.214 | ENSG00000026103 | FAS           | Fas cell surface death receptor                         | Plasma Membrane     |
| -8.065  | ENSG00000117560 | FASLG         | Fas ligand                                              | Extracellular Space |
| -9.268  | ENSG00000138399 | FASTKD1       | FAST kinase domains 1                                   | Cytoplasm           |
| -7.874  | ENSG00000124279 | FASTKD3       | FAST kinase domains 3                                   | Cytoplasm           |
| -6.971  | ENSG00000188878 | FBF1          | Fas binding factor 1                                    | Nucleus             |
| -7.442  | ENSG00000140092 | FBLN5         | fibulin 5                                               | Extracellular Space |
| -10.305 | ENSG00000166147 | FBN1          | fibrillin 1                                             | Extracellular Space |
| -8.891  | ENSG00000127452 | FBXL12        | F-box and leucine rich repeat protein 12                | Cytoplasm           |
| -2.467  | ENSG00000118564 | FBXL5         | F-box and leucine rich repeat protein 5                 | Cytoplasm           |
| -8.871  | ENSG00000151876 | FBXO4         | F-box protein 4                                         | Nucleus             |
| -5.297  | ENSG00000156509 | FBXO43        | F-box protein 43                                        | Nucleus             |
| -8.726  | ENSG00000132879 | FBXO44        | F-box protein 44                                        | Cytoplasm           |
| -9.136  | ENSG00000112029 | FBXO5         | F-box protein 5                                         | Nucleus             |
| -8.781  | ENSG00000116663 | FBXO6         | F-box protein 6                                         | Cytoplasm           |
| -6.207  | ENSG00000230701 | FBXW4P1       | F-box and WD repeat domain containing 4 pseudogene 1    | Other               |
| -11.568 | ENSG00000186431 | FCAR          | Fc fragment of IgA receptor                             | Plasma Membrane     |
| -8.528  | ENSG00000179639 | FCER1A        | Fc fragment of IgE receptor Ia                          | Plasma Membrane     |
| -7.606  | ENSG00000104921 | FCER2         | Fc fragment of IgE receptor II                          | Plasma Membrane     |
| -6.357  | ENSG00000228638 | FCF1P2        | FCF1 pseudogene 2                                       | Other               |
| -9.659  | ENSG00000150337 | FCGR1A        | Fc fragment of IgG receptor Ia                          | Plasma Membrane     |
| -7.651  | ENSG00000198019 | FCGR1B        | Fc fragment of IgG receptor Ib                          | Plasma Membrane     |
| -7.713  | ENSG00000072694 | FCGR2B        | Fc fragment of IgG receptor IIb                         | Plasma Membrane     |
| -9.883  | ENSG00000244682 | FCGR2C        | Fc fragment of IgG receptor IIc (gene/pseudogene)       | Plasma Membrane     |
| -10.504 | ENSG00000162747 | FCGR3A/FCGR3B | Fc fragment of IgG receptor IIIa                        | Plasma Membrane     |
| -5.941  | ENSG00000203747 | FCGR3A/FCGR3B | Fc fragment of IgG receptor IIIa                        | Plasma Membrane     |
| -12.387 | ENSG00000104870 | FCGR7         | Fc fragment of IgG receptor and transporter             | Plasma Membrane     |
| -10.994 | ENSG00000130475 | FCHO1         | FCH domain only 1                                       | Plasma Membrane     |
| -11.03  | ENSG00000162894 | FCMR          | Fc fragment of IgM receptor                             | Plasma Membrane     |
| -16.373 | ENSG00000085265 | FCN1          | ficolin 1                                               | Extracellular Space |
| -7.577  | ENSG00000163534 | FCRL1         | Fc receptor like 1                                      | Plasma Membrane     |
| -7.7    | ENSG00000132704 | FCRL2         | Fc receptor like 2                                      | Plasma Membrane     |
| -10.184 | ENSG00000160856 | FCRL3         | Fc receptor like 3                                      | Plasma Membrane     |
| -7.008  | ENSG00000143297 | FCRL5         | Fc receptor like 5                                      | Plasma Membrane     |
| -10.531 | ENSG00000181036 | FCRL6         | Fc receptor like 6                                      | Plasma Membrane     |
| -6.298  | ENSG00000132185 | FCRLA         | Fc receptor like A                                      | Plasma Membrane     |
| -5.279  | ENSG00000258872 | FDPSP3        | farnesyl diphosphate synthase pseudogene 3              | Other               |
| -5.689  | ENSG00000255561 | FDXACB1       | ferredoxin-fold anticodon binding domain containing 1   | Other               |
| -7.447  | ENSG00000149557 | FEZ1          | fasciculation and elongation protein zeta 1             | Cytoplasm           |
| -7.669  | ENSG00000126262 | FFAR2         | free fatty acid receptor 2                              | Plasma Membrane     |
| -11.128 | ENSG00000137441 | FGFBP2        | fibroblast growth factor binding protein 2              | Extracellular Space |
| -7.245  | ENSG00000174721 | FGFBP3        | fibroblast growth factor binding protein 3              | Extracellular Space |
| -9.896  | ENSG00000077782 | FGFR1         | fibroblast growth factor receptor 1                     | Plasma Membrane     |
| -5.916  | ENSG00000127951 | FGL2          | fibrinogen like 2                                       | Extracellular Space |
| -13.771 | ENSG00000000938 | FGR           | FGR proto-oncogene, Src family tyrosine kinase          | Nucleus             |
| -6.162  | ENSG00000142621 | FHAD1         | forkhead associated phosphopeptide binding domain 1     | Other               |
| -7.376  | ENSG00000189283 | FHIT          | fragile histidine triad                                 | Cytoplasm           |
| -9.883  | ENSG00000172500 | FIBP          | FGF1 intracellular binding protein                      | Nucleus             |
| -7.859  | ENSG00000198855 | FICD          | FIC domain containing                                   | Nucleus             |
| -2.16   | ENSG00000119321 | FKBP15        | FKBP prolyl isomerase 15                                | Plasma Membrane     |
| -8.49   | ENSG00000181027 | FKRP          | fukutin related protein                                 | Cytoplasm           |
| -7.005  | ENSG00000204584 | FLJ45513      | uncharacterized LOC729220                               | Other               |
| -10.856 | ENSG00000122025 | FLT3          | fms related tyrosine kinase 3                           | Plasma Membrane     |
| -6.1    | ENSG00000090554 | FLT3LG        | fms related tyrosine kinase 3 ligand                    | Extracellular Space |
| -6.828  | ENSG00000037280 | FLT4          | fms related tyrosine kinase 4                           | Plasma Membrane     |
| -6.994  | ENSG00000198468 | FLVCR1-DT     | FLVCR1 divergent transcript                             | Other               |
| -7.196  | ENSG00000162076 | FLYWCH2       | FLYWCH family member 2                                  | Other               |
| -6.784  | ENSG00000184922 | FMNL1         | formin like 1                                           | Cytoplasm           |
| -6.924  | ENSG00000076258 | FMO4          | flavin containing monooxygenase 4                       | Cytoplasm           |
| -3.12   | ENSG00000187239 | FNBP1         | formin binding protein 1                                | Nucleus             |
| -7.245  | ENSG00000228594 | FNDC10        | fibronectin type III domain containing 10               | Other               |
| -7.105  | ENSG00000165457 | FOLR2         | folate receptor beta                                    | Plasma Membrane     |
| -9.114  | ENSG00000110203 | FOLR3         | folate receptor 3                                       | Extracellular Space |
| -6.596  | ENSG00000186564 | FOXD2         | forkhead box D2                                         | Nucleus             |
| -7.351  | ENSG00000237424 | FOXD2-AS1     | FOXD2 adjacent opposite strand RNA 1                    | Other               |
| -2.092  | ENSG00000053254 | FOXN3         | forkhead box N3                                         | Nucleus             |
| -7.388  | ENSG00000049768 | FOXP3         | forkhead box P3                                         | Nucleus             |
| -12.663 | ENSG00000171051 | FPR1          | formyl peptide receptor 1                               | Plasma Membrane     |
| -10.919 | ENSG00000171049 | FPR2          | formyl peptide receptor 2                               | Plasma Membrane     |
| -10.617 | ENSG00000165879 | FRAT1         | FRAT regulator of WNT signaling pathway 1               | Cytoplasm           |
| -6.927  | ENSG00000181274 | FRAT2         | FRAT regulator of WNT signaling pathway 2               | Cytoplasm           |

|         |                 |                           |                                                                            |                     |
|---------|-----------------|---------------------------|----------------------------------------------------------------------------|---------------------|
| -9.767  | ENSG00000109536 | FRG1                      | FSHD region gene 1                                                         | Nucleus             |
| -7.314  | ENSG00000156869 | FRRS1                     | ferric chelate reductase 1                                                 | Plasma Membrane     |
| -7.322  | ENSG00000137218 | FRS3                      | fibroblast growth factor receptor substrate 3                              | Plasma Membrane     |
| -7.83   | ENSG00000070404 | FSTL3                     | folliculin like 3                                                          | Extracellular Space |
| -3.028  | ENSG00000227376 | FTH1P16                   | ferritin heavy chain 1 pseudogene 16                                       | Other               |
| -7.501  | ENSG00000225079 | FTH1P22                   | ferritin heavy chain 1 pseudogene 22                                       | Other               |
| -2.965  | ENSG00000087086 | FTL                       | ferritin light chain                                                       | Cytoplasm           |
| -4.528  | ENSG00000226608 | FTLP3                     | ferritin light chain pseudogene 3                                          | Other               |
| -7.953  | ENSG00000148803 | FUOM                      | fucose mutarotase                                                          | Cytoplasm           |
| -8.131  | ENSG00000172728 | FUT10                     | fucosyltransferase 10                                                      | Cytoplasm           |
| -10.608 | ENSG00000196968 | FUT11                     | fucosyltransferase 11                                                      | Cytoplasm           |
| -10.735 | ENSG00000196371 | FUT4                      | fucosyltransferase 4                                                       | Cytoplasm           |
| -7.768  | ENSG00000180549 | FUT7                      | fucosyltransferase 7                                                       | Cytoplasm           |
| -7.525  | ENSG00000010361 | FUZ                       | fuzzy planar cell polarity protein                                         | Plasma Membrane     |
| -3.041  | ENSG00000129245 | FXR2                      | FMR1 autosomal homolog 2                                                   | Cytoplasm           |
| -7.555  | ENSG00000137726 | FXYD6                     | FXYD domain containing ion transport regulator 6                           | Plasma Membrane     |
| -6.445  | ENSG00000221946 | FXYD7                     | FXYD domain containing ion transport regulator 7                           | Plasma Membrane     |
| -7.027  | ENSG00000180340 | FZD2                      | frizzled class receptor 2                                                  | Plasma Membrane     |
| -8.331  | ENSG00000123689 | G0S2                      | G0/G1 switch 2                                                             | Cytoplasm           |
| -9.246  | ENSG00000141349 | G6PC3                     | glucose-6-phosphatase catalytic subunit 3                                  | Cytoplasm           |
| -5.465  | ENSG00000111886 | GABRR2                    | gamma-aminobutyric acid type A receptor rho2 subunit                       | Plasma Membrane     |
| -7.111  | ENSG00000119514 | GALNT12                   | polypeptide N-acetylgalactosaminyltransferase 12                           | Cytoplasm           |
| -7.486  | ENSG00000158089 | GALNT14                   | polypeptide N-acetylgalactosaminyltransferase 14                           | Cytoplasm           |
| -7.9    | ENSG00000136542 | GALNT5                    | polypeptide N-acetylgalactosaminyltransferase 5                            | Cytoplasm           |
| -10.028 | ENSG00000139629 | GALNT6                    | polypeptide N-acetylgalactosaminyltransferase 6                            | Cytoplasm           |
| -5.596  | ENSG00000213930 | GALT                      | galactose-1-phosphate uridylyltransferase                                  | Cytoplasm           |
| -5.657  | ENSG00000130005 | GAMT                      | guanidinoacetate N-methyltransferase                                       | Cytoplasm           |
| -11.284 | ENSG00000175857 | GAPT                      | GRB2 binding adaptor protein, transmembrane                                | Other               |
| -7.213  | ENSG00000109534 | GAR1                      | GAR1 ribonucleoprotein                                                     | Nucleus             |
| -6.179  | ENSG00000157833 | GAREM2                    | GRB2 associated regulator of MAPK1 subtype 2                               | Cytoplasm           |
| -8.138  | ENSG00000183087 | GAS6                      | growth arrest specific 6                                                   | Extracellular Space |
| -7.043  | ENSG00000233695 | GAS6-AS1                  | GAS6 antisense RNA 1                                                       | Other               |
| -6.296  | ENSG00000007237 | GAS7                      | growth arrest specific 7                                                   | Cytoplasm           |
| -9.821  | ENSG00000107485 | GATA3                     | GATA binding protein 3                                                     | Nucleus             |
| -5.184  | ENSG00000059691 | GATB                      | glutamyl-tRNA amidotransferase subunit B                                   | Cytoplasm           |
| -10.607 | ENSG00000177628 | GBA                       | glucosylceramidase beta                                                    | Cytoplasm           |
| -5.874  | ENSG00000160766 | GBAP1                     | glucosylceramidase beta pseudogene 1                                       | Other               |
| -6.381  | ENSG00000148288 | GBGT1                     | globoside alpha-1,3-N-acetylgalactosaminyltransferase 1 (FORS blood group) | Other               |
| -4.491  | ENSG00000117228 | GBP1                      | guanylate binding protein 1                                                | Cytoplasm           |
| -13.247 | ENSG00000115271 | GCA                       | granulysin                                                                 | Cytoplasm           |
| -8.375  | ENSG00000105607 | GCDH                      | glutaryl-CoA dehydrogenase                                                 | Cytoplasm           |
| -6.881  | ENSG00000137880 | GCHFR                     | GTP cyclohydrolase I feedback regulator                                    | Cytoplasm           |
| -5.638  | ENSG00000176928 | GCNT4                     | glucosaminyl (N-acetyl) transferase 4                                      | Cytoplasm           |
| -6.622  | ENSG00000250889 | GCNT4                     | glucosaminyl (N-acetyl) transferase 4                                      | Cytoplasm           |
| -4.851  | ENSG00000137878 | GCOM1                     | GRINL1A complex locus 1                                                    | Other               |
| -7.959  | ENSG00000174500 | GCSAM                     | germinal center associated signaling and motility                          | Cytoplasm           |
| -8.104  | ENSG00000104381 | GDAP1                     | ganglioside induced differentiation associated protein 1                   | Cytoplasm           |
| -7.915  | ENSG00000135414 | GDF11                     | growth differentiation factor 11                                           | Extracellular Space |
| -6.497  | ENSG00000153982 | GDPD1                     | glycerophosphodiester phosphodiesterase domain containing 1                | Other               |
| -7.011  | ENSG00000102886 | GDPD3                     | glycerophosphodiester phosphodiesterase domain containing 3                | Cytoplasm           |
| -7.457  | ENSG00000092208 | GEMIN2                    | gem nuclear organelle associated protein 2                                 | Nucleus             |
| -7.439  | ENSG00000142252 | GEMIN7                    | gem nuclear organelle associated protein 7                                 | Nucleus             |
| -7.843  | ENSG00000239857 | GET4                      | golgi to ER traffic protein 4                                              | Cytoplasm           |
| -10.801 | ENSG00000162676 | GF11                      | growth factor independent 1 transcriptional repressor                      | Nucleus             |
| -6.964  | ENSG00000168546 | GFRA2                     | GDNF family receptor alpha 2                                               | Plasma Membrane     |
| -6.327  | ENSG00000134864 | GGACT                     | gamma-glutamylamine cyclotransferase                                       | Cytoplasm           |
| -8.536  | ENSG00000100031 | GGT1                      | gamma-glutamyltransferase 1                                                | Plasma Membrane     |
| -7.829  | ENSG00000131067 | GGT7                      | gamma-glutamyltransferase 7                                                | Plasma Membrane     |
| -6.251  | ENSG00000157017 | GHRL                      | ghrelin and obestatin prepropeptide                                        | Extracellular Space |
| -6.727  | ENSG00000257698 | GIHCG                     | GIHCG inhibitor of miR-200b/200a/429 expression                            | Other               |
| -11.696 | ENSG00000213203 | GIMAP1                    | GTPase, IMAP family member 1                                               | Cytoplasm           |
| -11.172 | ENSG00000106560 | GIMAP2                    | GTPase, IMAP family member 2                                               | Cytoplasm           |
| -13.504 | ENSG00000133574 | GIMAP4                    | GTPase, IMAP family member 4                                               | Nucleus             |
| -11.801 | ENSG00000196329 | GIMAP5                    | GTPase, IMAP family member 5                                               | Cytoplasm           |
| -11.843 | ENSG00000133561 | GIMAP6                    | GTPase, IMAP family member 6                                               | Cytoplasm           |
| -12.815 | ENSG00000179144 | GIMAP7                    | GTPase, IMAP family member 7                                               | Cytoplasm           |
| -11.73  | ENSG00000171115 | GIMAP8                    | GTPase, IMAP family member 8                                               | Other               |
| -8.202  | ENSG00000145723 | GIN1                      | gypsy retrotransposon integrase 1                                          | Other               |
| -7.224  | ENSG00000101003 | GIN51                     | GIN5 complex subunit 1                                                     | Nucleus             |
| -5.961  | ENSG00000181938 | GIN53                     | GIN5 complex subunit 3                                                     | Nucleus             |
| -6.424  | ENSG00000010310 | GIPR                      | gastric inhibitory polypeptide receptor                                    | Plasma Membrane     |
| -7.079  | ENSG00000163521 | GLB1L                     | galactosidase beta 1 like                                                  | Extracellular Space |
| -13.054 | ENSG00000139278 | GLIPR1                    | GLI pathogenesis related 1                                                 | Extracellular Space |
| -7.929  | ENSG00000174842 | GLMN                      | glomulin, FKBP associated protein                                          | Cytoplasm           |
| -11.858 | ENSG00000173221 | GLRX                      | glutaredoxin                                                               | Cytoplasm           |
| -5.438  | ENSG00000135423 | GLS2                      | glutaminase 2                                                              | Cytoplasm           |
| -11.787 | ENSG00000151948 | GLT1D1                    | glycosyltransferase 1 domain containing 1                                  | Extracellular Space |
| -8.074  | ENSG00000250959 | GLUD1P3                   | glutamate dehydrogenase 1 pseudogene 3                                     | Other               |
| -9.211  | ENSG00000168237 | GLYCKT                    | glycerate kinase                                                           | Cytoplasm           |
| -4.925  | ENSG00000130755 | GMFG                      | glia maturation factor gamma                                               | Cytoplasm           |
| -9.037  | ENSG00000144591 | GMPPA                     | GDP-mannose pyrophosphorylase A                                            | Cytoplasm           |
| -6.711  | ENSG00000141404 | GNAL                      | G protein subunit alpha L                                                  | Cytoplasm           |
| -8.95   | ENSG00000159921 | GNE                       | glucosamine (UDP-N-acetyl)-2-epimerase/N-acetylmannosamine kinase          | Cytoplasm           |
| -13.063 | ENSG00000186469 | GNG2                      | G protein subunit gamma 2                                                  | Plasma Membrane     |
| -8      | ENSG00000176533 | GNG7                      | G protein subunit gamma 7                                                  | Plasma Membrane     |
| -8.1    | ENSG00000167083 | GNGT2                     | G protein subunit gamma transducin 2                                       | Plasma Membrane     |
| -12.231 | ENSG00000115523 | GNLY                      | granulysin                                                                 | Cytoplasm           |
| -7.396  | ENSG00000163281 | GNPDA2                    | glucosamine-6-phosphate deaminase 2                                        | Nucleus             |
| -6.421  | ENSG00000251215 | GOLGA5P1                  | golgin A5 pseudogene 1                                                     | Other               |
| -6.753  | ENSG00000261794 | GOLGA8J (includes others) | golgin A8 family member K                                                  | Other               |
| -5.986  | ENSG00000188626 | GOLGA8J (includes others) | golgin A8 family member K                                                  | Other               |

|         |                 |                           |                                                                      |                     |
|---------|-----------------|---------------------------|----------------------------------------------------------------------|---------------------|
| -7.249  | ENSG00000206127 | GOLGA8J (includes others) | golgin A8 family member K                                            | Other               |
| -7.844  | ENSG00000170270 | GON7                      | GON7 subunit of KEOPS complex                                        | Nucleus             |
| -5.703  | ENSG00000143167 | GPA33                     | glycoprotein A33                                                     | Plasma Membrane     |
| -10.369 | ENSG00000138678 | GPAT3                     | glycerol-3-phosphate acyltransferase 3                               | Cytoplasm           |
| -9.345  | ENSG00000179921 | GPBAR1                    | G protein-coupled bile acid receptor 1                               | Plasma Membrane     |
| -5.544  | ENSG00000213420 | GPC2                      | glypican 2                                                           | Plasma Membrane     |
| -4.554  | ENSG00000164850 | GPER1                     | G protein-coupled estrogen receptor 1                                | Plasma Membrane     |
| -7.202  | ENSG00000112293 | GPLD1                     | glycosylphosphatidylinositol specific phospholipase D1               | Cytoplasm           |
| -6.778  | ENSG00000136235 | GNPMB                     | glycoprotein nmb                                                     | Plasma Membrane     |
| -10.902 | ENSG00000183484 | GPR132                    | G protein-coupled receptor 132                                       | Plasma Membrane     |
| -5.975  | ENSG00000181619 | GPR135                    | G protein-coupled receptor 135                                       | Plasma Membrane     |
| -9.256  | ENSG00000077585 | GPR137B                   | G protein-coupled receptor 137B                                      | Plasma Membrane     |
| -9.253  | ENSG00000187037 | GPR141                    | G protein-coupled receptor 141                                       | Plasma Membrane     |
| -8.82   | ENSG00000164849 | GPR146                    | G protein-coupled receptor 146                                       | Plasma Membrane     |
| -5.623  | ENSG00000154165 | GPR15                     | G protein-coupled receptor 15                                        | Plasma Membrane     |
| -6.68   | ENSG00000158292 | GPR153                    | G protein-coupled receptor 153                                       | Plasma Membrane     |
| -8.695  | ENSG00000250510 | GPR162                    | G protein-coupled receptor 162                                       | Plasma Membrane     |
| -7.559  | ENSG00000174946 | GPR171                    | G protein-coupled receptor 171                                       | Plasma Membrane     |
| -8.55   | ENSG00000147138 | GPR174                    | G protein-coupled receptor 174                                       | Plasma Membrane     |
| -6.647  | ENSG00000125245 | GPR18                     | G protein-coupled receptor 18                                        | Plasma Membrane     |
| -5.71   | ENSG00000204882 | GPR20                     | G protein-coupled receptor 20                                        | Plasma Membrane     |
| -5.265  | ENSG00000188394 | GPR21                     | G protein-coupled receptor 21                                        | Plasma Membrane     |
| -9.561  | ENSG00000170837 | GPR27                     | G protein-coupled receptor 27                                        | Plasma Membrane     |
| -8.5    | ENSG00000171659 | GPR34                     | G protein-coupled receptor 34                                        | Plasma Membrane     |
| -7.946  | ENSG00000178623 | GPR35                     | G protein-coupled receptor 35                                        | Plasma Membrane     |
| -6.408  | ENSG00000203737 | GPR52                     | G protein-coupled receptor 52                                        | Plasma Membrane     |
| -7.333  | ENSG00000135898 | GPR55                     | G protein-coupled receptor 55                                        | Plasma Membrane     |
| -10.993 | ENSG00000140030 | GPR65                     | G protein-coupled receptor 65                                        | Plasma Membrane     |
| -7.718  | ENSG00000119714 | GPR68                     | G protein-coupled receptor 68                                        | Plasma Membrane     |
| -8.549  | ENSG00000139572 | GPR84                     | G protein-coupled receptor 84                                        | Plasma Membrane     |
| -5.773  | ENSG00000188092 | GPR89A/GPR89B             | G protein-coupled receptor 89B                                       | Cytoplasm           |
| -6.394  | ENSG00000169258 | GPRIN1                    | G protein regulated inducer of neurite outgrowth 1                   | Plasma Membrane     |
| -11.992 | ENSG00000185477 | GPRIN3                    | GPRIN family member 3                                                | Other               |
| -5.74   | ENSG00000132522 | GPS2                      | G protein pathway suppressor 2                                       | Nucleus             |
| -6.22   | ENSG00000211445 | GPX3                      | glutathione peroxidase 3                                             | Extracellular Space |
| -6.725  | ENSG00000116157 | GPX7                      | glutathione peroxidase 7                                             | Cytoplasm           |
| -9.845  | ENSG00000023171 | GRAMD1B                   | GRAM domain containing 1B                                            | Other               |
| -9.238  | ENSG00000161835 | GRASP                     | general receptor for phosphoinositides 1 associated scaffold protein | Plasma Membrane     |
| -6.434  | ENSG00000115290 | GRB14                     | growth factor receptor bound protein 14                              | Plasma Membrane     |
| -6.898  | ENSG00000180875 | GREM2                     | gremlin 2, DAN family BMP antagonist                                 | Extracellular Space |
| -5.784  | ENSG00000105737 | GRIK5                     | glutamate ionotropic receptor kainate type subunit 5                 | Plasma Membrane     |
| -6.575  | ENSG00000105464 | GRIN2D                    | glutamate ionotropic receptor NMDA type subunit 2D                   | Plasma Membrane     |
| -5.561  | ENSG00000116032 | GRIN3B                    | glutamate ionotropic receptor NMDA type subunit 3B                   | Plasma Membrane     |
| -7.281  | ENSG00000125388 | GRK4                      | G protein-coupled receptor kinase 4                                  | Plasma Membrane     |
| -6.174  | ENSG00000228485 | GRK5-IT1                  | GRK5 intronic transcript 1                                           | Other               |
| -6.183  | ENSG00000164082 | GRM2                      | glutamate metabotropic receptor 2                                    | Plasma Membrane     |
| -3.796  | ENSG00000030582 | GRN                       | granulin precursor                                                   | Extracellular Space |
| -5.316  | ENSG00000254690 | GS1_393G1212              | chondroitin sulfate proteoglycan 4 pseudogene 3 Y-linked             | Other               |
| -5.454  | ENSG00000253853 | GS1_57L111                | chondroitin sulfate proteoglycan 4 pseudogene 3 Y-linked             | Other               |
| -7.8    | ENSG00000189369 | GSPT2                     | G1 to S phase transition 2                                           | Cytoplasm           |
| -7.873  | ENSG00000168765 | GSTM4                     | glutathione S-transferase mu 4                                       | Cytoplasm           |
| -6.949  | ENSG00000145736 | GTF2H2                    | general transcription factor IIH subunit 2                           | Nucleus             |
| -7.245  | ENSG00000226259 | GTF2H2B                   | general transcription factor IIH subunit 2B (pseudogene)             | Other               |
| -7.449  | ENSG00000183474 | GTF2H2C                   | GTF2H2 family member C                                               | Nucleus             |
| -8.754  | ENSG00000111358 | GTF2H3                    | general transcription factor IIH subunit 3                           | Nucleus             |
| -5.9    | ENSG00000272645 | GTF2IP20                  | general transcription factor Ili pseudogene 20                       | Other               |
| -8.553  | ENSG00000130299 | GTPBP3                    | GTP binding protein 3, mitochondrial                                 | Cytoplasm           |
| -8.502  | ENSG00000163607 | GTPBP8                    | GTP binding protein 8 (putative)                                     | Cytoplasm           |
| -6.384  | ENSG00000075218 | GTSF1                     | G2 and S-phase expressed 1                                           | Cytoplasm           |
| -6.396  | ENSG00000170627 | GTSF1                     | gametocyte specific factor 1                                         | Cytoplasm           |
| -5.561  | ENSG00000112599 | GUCA1B                    | guanylate cyclase activator 1B                                       | Cytoplasm           |
| -6.376  | ENSG00000241549 | GUSBP2                    | GUSB pseudogene 2                                                    | Other               |
| -6.951  | ENSG00000253203 | GUSBP3                    | GUSB pseudogene 3                                                    | Other               |
| -12.26  | ENSG00000254838 | GVINP1                    | GTPase, very large interferon inducible pseudogene 1                 | Other               |
| -6.589  | ENSG00000179240 | GVQW3                     | GVQW motif containing 3                                              | Other               |
| -8.927  | ENSG00000250361 | GYPB                      | glycophorin B (MNS blood group)                                      | Plasma Membrane     |
| -11.004 | ENSG00000145649 | GZMA                      | granzyme A                                                           | Cytoplasm           |
| -11.347 | ENSG00000100453 | GZMB                      | granzyme B                                                           | Cytoplasm           |
| -10.751 | ENSG00000100450 | GZMH                      | granzyme H                                                           | Cytoplasm           |
| -8.906  | ENSG00000113088 | GZMK                      | granzyme K                                                           | Cytoplasm           |
| -8.155  | ENSG00000197540 | GZMM                      | granzyme M                                                           | Cytoplasm           |
| -1.965  | ENSG00000113648 | H2AFY                     | H2A histone family member Y                                          | Nucleus             |
| -5.857  | ENSG00000099284 | H2AFY2                    | H2A histone family member Y2                                         | Nucleus             |
| -3.934  | ENSG00000049239 | H6PD                      | hexose-6-phosphate dehydrogenase/glucose 1-dehydrogenase             | Cytoplasm           |
| -7.984  | ENSG00000162882 | HAAO                      | 3-hydroxyanthranilate 3,4-dioxygenase                                | Cytoplasm           |
| -6.142  | ENSG00000103253 | HAGHL                     | hydroxycylglutathione hydrolase like                                 | Other               |
| -10.455 | ENSG00000084110 | HAL                       | histidine ammonia-lyase                                              | Cytoplasm           |
| -4.876  | ENSG00000105697 | HAMP                      | hepcidin antimicrobial peptide                                       | Extracellular Space |
| -8.191  | ENSG00000140511 | HAPLN3                    | hyaluronan and proteoglycan link protein 3                           | Extracellular Space |
| -7.022  | ENSG00000180423 | HARB1                     | harbinger transposase derived 1                                      | Cytoplasm           |
| -6.415  | ENSG00000103044 | HAS3                      | hyaluronan synthase 3                                                | Plasma Membrane     |
| -6.129  | ENSG00000177602 | HASPIN                    | histone H3 associated protein kinase                                 | Nucleus             |
| -7.953  | ENSG00000092036 | HAUS4                     | HAUS augmin like complex subunit 4                                   | Cytoplasm           |
| -9.888  | ENSG00000135077 | HAVCR2                    | hepatitis A virus cellular receptor 2                                | Plasma Membrane     |
| -8.738  | ENSG00000086506 | HBQ1                      | hemoglobin subunit theta 1                                           | Other               |
| -7.059  | ENSG00000227766 | HCG4P5                    | HLA complex group 4 pseudogene 5                                     | Other               |
| -6.389  | ENSG00000230521 | HCG4P7                    | HLA complex group 4 pseudogene 7                                     | Other               |
| -13.361 | ENSG00000101336 | HCK                       | HCK proto-oncogene, Src family tyrosine kinase                       | Cytoplasm           |
| -5.662  | ENSG00000180353 | HCL1S1                    | hematopoietic cell-specific Lyn substrate 1                          | Nucleus             |
| -9.226  | ENSG00000126264 | HCST                      | hematopoietic cell signal transducer                                 | Plasma Membrane     |
| -6.575  | ENSG00000100429 | HDAC10                    | histone deacetylase 10                                               | Nucleus             |

|         |                 |            |                                                                              |                     |
|---------|-----------------|------------|------------------------------------------------------------------------------|---------------------|
| -9.803  | ENSG00000140287 | HDC        | histidine decarboxylase                                                      | Cytoplasm           |
| -7.811  | ENSG00000184508 | HDDC3      | HD domain containing 3                                                       | Other               |
| -5.884  | ENSG00000165259 | HDX        | highly divergent homeobox                                                    | Other               |
| -2.089  | ENSG00000112406 | HECA       | hdc homolog, cell cycle regulator                                            | Nucleus             |
| -6.439  | ENSG00000138411 | HECW2      | HECT, C2 and WW domain containing E3 ubiquitin protein ligase 2              | Extracellular Space |
| -11.05  | ENSG00000173706 | HEG1       | heart development protein with EGF like domains 1                            | Plasma Membrane     |
| -2.969  | ENSG00000130589 | HELZ2      | helicase with zinc finger 2                                                  | Nucleus             |
| -9.465  | ENSG00000114735 | HEMK1      | HemK methyltransferase family member 1                                       | Nucleus             |
| -9.485  | ENSG00000162639 | HENMT1     | HEN methyltransferase 1                                                      | Other               |
| -7.078  | ENSG00000144485 | HES6       | hes family bHLH transcription factor 6                                       | Nucleus             |
| -4.888  | ENSG00000010704 | HFE        | homeostatic iron regulator                                                   | Plasma Membrane     |
| -9.491  | ENSG00000019991 | HGF        | hepatocyte growth factor                                                     | Extracellular Space |
| -7.87   | ENSG00000054392 | HHAT       | hedgehog acyltransferase                                                     | Cytoplasm           |
| -6.577  | ENSG00000177374 | HIC1       | HIC ZBTB transcriptional repressor 1                                         | Nucleus             |
| -9.218  | ENSG00000169635 | HIC2       | HIC ZBTB transcriptional repressor 2                                         | Nucleus             |
| -6.304  | ENSG00000197153 | HIST1H3J   | histone cluster 1 H3 family member j                                         | Nucleus             |
| -5.537  | ENSG00000197238 | HIST1H4J   | histone cluster 1 H4 family member j                                         | Nucleus             |
| -7.854  | ENSG00000181218 | HIST3H2A   | histone cluster 3 H2A                                                        | Nucleus             |
| -13.765 | ENSG00000160883 | HK3        | hexokinase 3                                                                 | Cytoplasm           |
| -11.574 | ENSG00000242574 | HLA-DMB    | major histocompatibility complex, class II, DM beta                          | Plasma Membrane     |
| -6.873  | ENSG00000204252 | HLA-DOA    | major histocompatibility complex, class II, DO alpha                         | Plasma Membrane     |
| -7.551  | ENSG00000241106 | HLA-DOB    | major histocompatibility complex, class II, DO beta                          | Plasma Membrane     |
| -13.172 | ENSG00000231389 | HLA-DPA1   | major histocompatibility complex, class II, DP alpha 1                       | Plasma Membrane     |
| -13.066 | ENSG00000223865 | HLA-DPB1   | major histocompatibility complex, class II, DP beta 1                        | Plasma Membrane     |
| -10.645 | ENSG00000196735 | HLA-DQA1   | major histocompatibility complex, class II, DQ alpha 1                       | Plasma Membrane     |
| -8.548  | ENSG00000237541 | HLA-DQA2   | major histocompatibility complex, class II, DQ alpha 2                       | Plasma Membrane     |
| -4.671  | ENSG00000204287 | HLA-DRA    | major histocompatibility complex, class II, DR alpha                         | Plasma Membrane     |
| -6.308  | ENSG00000198502 | HLA-DRB5   | major histocompatibility complex, class II, DR beta 5                        | Plasma Membrane     |
| -9.138  | ENSG00000229391 | HLA-DRB6   | major histocompatibility complex, class II, DR beta 6 (pseudogene)           | Other               |
| -7.258  | ENSG00000214922 | HLA-F-AS1  | HLA-F antisense RNA 1                                                        | Other               |
| -6.827  | ENSG00000230795 | HLA-K      | major histocompatibility complex, class I, K (pseudogene)                    | Plasma Membrane     |
| -7.441  | ENSG00000243753 | HLA-L      | major histocompatibility complex, class I, L (pseudogene)                    | Other               |
| -5.59   | ENSG00000237646 | HLCS-IT1   | HLCS intronic transcript 1                                                   | Other               |
| -6.438  | ENSG00000108924 | HLF        | HLF transcription factor, PAR bZIP family member                             | Nucleus             |
| -11.486 | ENSG00000136630 | HLX        | H2.0 like homeobox                                                           | Nucleus             |
| -5.894  | ENSG00000235313 | HM13-IT1   | HM13 intronic transcript 1                                                   | Other               |
| -5.938  | ENSG00000234705 | HMGAI1P4   | high mobility group AT-hook 1 pseudogene 4                                   | Other               |
| -7.701  | ENSG00000197301 | HMGGA2-AS1 | HMGGA2 antisense RNA 1                                                       | Other               |
| -6.44   | ENSG00000250011 | HMGGB1P3   | high mobility group box 1 pseudogene 3                                       | Other               |
| -6.204  | ENSG00000233266 | HMGGB1P31  | high mobility group box 1 pseudogene 31                                      | Other               |
| -6.114  | ENSG00000260828 | HMGGB3P32  | high mobility group box 3 pseudogene 32                                      | Other               |
| -7.493  | ENSG00000228808 | HMGGB3P4   | high mobility group box 3 pseudogene 4                                       | Other               |
| -8.966  | ENSG00000117305 | HMGCL      | 3-hydroxy-3-methylglutaryl-CoA lyase                                         | Cytoplasm           |
| -6.811  | ENSG00000270362 | HMGN3-AS1  | HMGN3 antisense RNA 1                                                        | Other               |
| -10.099 | ENSG00000150540 | HNMT       | histamine N-methyltransferase                                                | Cytoplasm           |
| -2.62   | ENSG00000214223 | HNRNPA1P10 | heterogeneous nuclear ribonucleoprotein A1 pseudogene 10                     | Other               |
| -3.089  | ENSG00000215492 | HNRNPA1P7  | heterogeneous nuclear ribonucleoprotein A1 pseudogene 7                      | Other               |
| -5.893  | ENSG00000227688 | HNRNPA3P2  | heterogeneous nuclear ribonucleoprotein A3 pseudogene 2                      | Other               |
| -6.205  | ENSG00000258900 | HNRNP1C    | heterogeneous nuclear ribonucleoprotein C pseudogene 1                       | Other               |
| -8.019  | ENSG00000051128 | HOMER3     | homer scaffold protein 3                                                     | Plasma Membrane     |
| -7.541  | ENSG00000143452 | HORMAD1    | HORMA domain containing 1                                                    | Nucleus             |
| -6.372  | ENSG00000105991 | HOXA1      | homeobox A1                                                                  | Nucleus             |
| -6.641  | ENSG00000230148 | HOXB-AS1   | HOXB cluster antisense RNA 1                                                 | Other               |
| -7.31   | ENSG00000173917 | HOXB2      | homeobox B2                                                                  | Nucleus             |
| -6.662  | ENSG00000120093 | HOXB3      | homeobox B3                                                                  | Nucleus             |
| -4.932  | ENSG00000182742 | HOXB4      | homeobox B4                                                                  | Nucleus             |
| -11.238 | ENSG00000257017 | HP         | haptoglobin                                                                  | Extracellular Space |
| -5.912  | ENSG00000158104 | HPD        | 4-hydroxyphenylpyruvate dioxygenase                                          | Cytoplasm           |
| -4.495  | ENSG00000163755 | HPS3       | HPS3 biogenesis of lysosomal organelles complex 2 subunit 1                  | Cytoplasm           |
| -10.516 | ENSG00000113749 | HRH2       | histamine receptor H2                                                        | Plasma Membrane     |
| -7.968  | ENSG00000134489 | HRH4       | histamine receptor H4                                                        | Plasma Membrane     |
| -9.128  | ENSG00000125430 | HS3ST3B1   | heparan sulfate-glucosamine 3-sulfotransferase 3B1                           | Cytoplasm           |
| -6.733  | ENSG00000100209 | HSCB       | HscB mitochondrial iron-sulfur cluster cochaperone                           | Cytoplasm           |
| -5.53   | ENSG00000170509 | HSD17B13   | hydroxysteroid 17-beta dehydrogenase 13                                      | Extracellular Space |
| -6.253  | ENSG00000099377 | HSD3B7     | hydroxy-delta-5-steroid dehydrogenase, 3 beta- and steroid delta-isomerase 7 | Cytoplasm           |
| -6.472  | ENSG00000102878 | HSF4       | heat shock transcription factor 4                                            | Nucleus             |
| -5.857  | ENSG00000176160 | HSF5       | heat shock transcription factor 5                                            | Other               |
| -10.802 | ENSG00000196684 | HSZD       | hematopoietic SH2 domain containing                                          | Cytoplasm           |
| -6.969  | ENSG00000204390 | HSPA1L     | heat shock protein family A (Hsp70) member 1 like                            | Cytoplasm           |
| -6.376  | ENSG00000164070 | HSPA4L     | heat shock protein family A (Hsp70) member 4 like                            | Cytoplasm           |
| -10.431 | ENSG00000225217 | HSPA7      | heat shock protein family A (Hsp70) member 7                                 | Cytoplasm           |
| -5.719  | ENSG00000234788 | HSPA8P3    | heat shock protein family A (Hsp70) member 8 pseudogene 3                    | Other               |
| -6.205  | ENSG00000241478 | HSPA8P9    | heat shock protein family A (Hsp70) member 8 pseudogene 9                    | Other               |
| -6.366  | ENSG00000187762 | HSPE1P11   | chondroitin sulfate proteoglycan 4 pseudogene 3 Y-linked                     | Other               |
| -6.921  | ENSG00000225900 | HSPE1P13   | chondroitin sulfate proteoglycan 4 pseudogene 3 Y-linked                     | Other               |
| -7.643  | ENSG00000255163 | HSPE1P18   | chondroitin sulfate proteoglycan 4 pseudogene 3 Y-linked                     | Other               |
| -5.637  | ENSG00000232015 | HSPE1P25   | heat shock protein family E (Hsp10) member 1 pseudogene 25                   | Other               |
| -6.57   | ENSG00000166033 | HTRA1      | Htra serine peptidase 1                                                      | Extracellular Space |
| -8.745  | ENSG00000170801 | HTRA3      | Htra serine peptidase 3                                                      | Extracellular Space |
| -6.284  | ENSG00000169495 | HTRA4      | Htra serine peptidase 4                                                      | Other               |
| -5.867  | ENSG00000188996 | HUS1B      | HUS1 checkpoint clamp component B                                            | Other               |
| -10.879 | ENSG00000122986 | HVCN1      | hydrogen voltage gated channel 1                                             | Plasma Membrane     |
| -7.187  | ENSG00000068001 | HYAL2      | hyaluronidase 2                                                              | Cytoplasm           |
| -7.159  | ENSG00000186792 | HYAL3      | hyaluronidase 3                                                              | Cytoplasm           |
| -6.412  | ENSG00000198331 | HYLS1      | HYLS1 centriolar and ciliogenesis associated                                 | Nucleus             |
| -9.198  | ENSG00000134330 | IAH1       | isoamyl acetate hydrolyzing esterase 1 (putative)                            | Cytoplasm           |
| -12.447 | ENSG00000076662 | ICAM3      | intercellular adhesion molecule 3                                            | Plasma Membrane     |
| -7.13   | ENSG00000105371 | ICAM4      | intercellular adhesion molecule 4 (Landsteiner-Wiener blood group)           | Plasma Membrane     |
| -2.105  | ENSG00000164151 | ICE1       | interactor of little elongation complex ELL subunit 1                        | Nucleus             |
| -8.165  | ENSG00000163600 | ICOS       | inducible T cell costimulator                                                | Plasma Membrane     |
| -10.803 | ENSG00000067829 | IDH3G      | isocitrate dehydrogenase 3 (NAD(+)) gamma                                    | Cytoplasm           |

|         |                 |             |                                                             |                     |
|---------|-----------------|-------------|-------------------------------------------------------------|---------------------|
| -11.139 | ENSG00000137331 | IER3        | immediate early response 3                                  | Cytoplasm           |
| -7.465  | ENSG00000134049 | IER3IP1     | immediate early response 3 interacting protein 1            | Cytoplasm           |
| -6.342  | ENSG00000165948 | IFI27L1     | interferon alpha inducible protein 27 like 1                | Other               |
| -9.599  | ENSG00000216490 | IFI30       | IFI30 lysosomal thiol reductase                             | Cytoplasm           |
| -11.084 | ENSG00000137959 | IFI44L      | interferon induced protein 44 like                          | Nucleus             |
| -8.852  | ENSG00000185745 | IFIT1       | interferon induced protein with tetratricopeptide repeats 1 | Cytoplasm           |
| -8.767  | ENSG00000185885 | IFITM1      | interferon induced transmembrane protein 1                  | Plasma Membrane     |
| -7.081  | ENSG00000244242 | IFITM10     | interferon induced transmembrane protein 10                 | Other               |
| -5.823  | ENSG00000185201 | IFITM2      | interferon induced transmembrane protein 2                  | Cytoplasm           |
| -11.274 | ENSG00000142089 | IFITM3      | interferon induced transmembrane protein 3                  | Plasma Membrane     |
| -9.12   | ENSG00000159110 | IFNAR2      | interferon alpha and beta receptor subunit 2                | Plasma Membrane     |
| -6.279  | ENSG00000255733 | IFNG-AS1    | IFNG antisense RNA 1                                        | Other               |
| -3.358  | ENSG00000159128 | IFNGR2      | interferon gamma receptor 2                                 | Plasma Membrane     |
| -7.027  | ENSG00000119650 | IFT43       | intraflagellar transport 43                                 | Cytoplasm           |
| -8.096  | ENSG0000066885  | IFT80       | intraflagellar transport 80                                 | Extracellular Space |
| -3.01   | ENSG00000197081 | IGF2R       | insulin like growth factor 2 receptor                       | Plasma Membrane     |
| -9.051  | ENSG00000163453 | IGFBP7      | insulin like growth factor binding protein 7                | Extracellular Space |
| -12.248 | ENSG00000211895 | IGHA1       | immunoglobulin heavy constant alpha 1                       | Extracellular Space |
| -10.017 | ENSG00000211890 | IGHA2       | immunoglobulin heavy constant alpha 2 (A2m marker)          | Extracellular Space |
| -8.631  | ENSG00000211898 | IGHD        | immunoglobulin heavy constant delta                         | Extracellular Space |
| -9.708  | ENSG00000211896 | IGHG1       | immunoglobulin heavy constant gamma 1 (G1m marker)          | Extracellular Space |
| -7.728  | ENSG00000211893 | IGHG2       | immunoglobulin heavy constant gamma 2 (G2m marker)          | Plasma Membrane     |
| -7.142  | ENSG00000211897 | IGHG3       | immunoglobulin heavy constant gamma 3 (G3m marker)          | Extracellular Space |
| -6.764  | ENSG00000211892 | IGHG4       | immunoglobulin heavy constant gamma 4 (G4m marker)          | Extracellular Space |
| -11.604 | ENSG00000211899 | IGHM        | immunoglobulin heavy constant mu                            | Plasma Membrane     |
| -7.22   | ENSG00000211945 | IGHV1-18    | immunoglobulin heavy variable 1-18                          | Other               |
| -5.473  | ENSG00000211935 | IGHV1-3     | immunoglobulin heavy variable 1-3                           | Other               |
| -6.344  | ENSG00000211962 | IGHV1-46    | immunoglobulin heavy variable 1-46                          | Other               |
| -6.053  | ENSG00000211973 | IGHV1-69    | immunoglobulin heavy variable 1-69                          | Other               |
| -6.392  | ENSG00000270505 | IGHV1OR15-1 | immunoglobulin heavy variable 1/OR15-1 (non-functional)     | Other               |
| -6.477  | ENSG00000211937 | IGHV2-5     | immunoglobulin heavy variable 2-5                           | Other               |
| -6.092  | ENSG00000211943 | IGHV3-15    | immunoglobulin heavy variable 3-15                          | Other               |
| -8.151  | ENSG00000211949 | IGHV3-23    | immunoglobulin heavy variable 3-23                          | Extracellular Space |
| -6.499  | ENSG00000211955 | IGHV3-33    | immunoglobulin heavy variable 3-33                          | Extracellular Space |
| -7.184  | ENSG00000211938 | IGHV3-7     | immunoglobulin heavy variable 3-7                           | Extracellular Space |
| -6.848  | ENSG00000211956 | IGHV4-34    | immunoglobulin heavy variable 4-34                          | Other               |
| -7.17   | ENSG00000211959 | IGHV4-39    | immunoglobulin heavy variable 4-39                          | Other               |
| -5.723  | ENSG00000211966 | IGHV5-51    | immunoglobulin heavy variable 5-51                          | Other               |
| -5.692  | ENSG00000240864 | IGKV1-16    | immunoglobulin kappa variable 1-16                          | Extracellular Space |
| -7.53   | ENSG00000243466 | IGKV1-5     | immunoglobulin kappa variable 1-5                           | Extracellular Space |
| -5.624  | ENSG00000241755 | IGKV1-9     | immunoglobulin kappa variable 1-9                           | Other               |
| -6.614  | ENSG00000239951 | IGKV3-20    | immunoglobulin kappa variable 3-20                          | Extracellular Space |
| -7.761  | ENSG00000211598 | IGKV4-1     | immunoglobulin kappa variable 4-1                           | Extracellular Space |
| -5.57   | ENSG00000211677 | IGLC2       | immunoglobulin lambda constant 2                            | Extracellular Space |
| -6.475  | ENSG00000211679 | IGLC3       | immunoglobulin lambda constant 3 (Kern-Oz+ marker)          | Extracellular Space |
| -6.877  | ENSG00000211653 | IGLV1-40    | immunoglobulin lambda variable 1-40                         | Other               |
| -7.076  | ENSG00000211651 | IGLV1-44    | immunoglobulin lambda variable 1-44                         | Other               |
| -7.151  | ENSG00000211648 | IGLV1-47    | immunoglobulin lambda variable 1-47                         | Extracellular Space |
| -6.59   | ENSG00000211660 | IGLV2-23    | immunoglobulin lambda variable 2-23                         | Other               |
| -5.741  | ENSG00000211673 | IGLV3-1     | immunoglobulin lambda variable 3-1                          | Other               |
| -6.247  | ENSG00000211663 | IGLV3-19    | immunoglobulin lambda variable 3-19                         | Extracellular Space |
| -6.489  | ENSG00000152580 | IGSF10      | immunoglobulin superfamily member 10                        | Extracellular Space |
| -11.615 | ENSG00000140749 | IGSF6       | immunoglobulin superfamily member 6                         | Plasma Membrane     |
| -7.858  | ENSG00000808054 | IGSF9B      | immunoglobulin superfamily member 9B                        | Plasma Membrane     |
| -5.983  | ENSG00000185811 | IKZF1       | IKAROS family zinc finger 1                                 | Nucleus             |
| -11.769 | ENSG00000161405 | IKZF3       | IKAROS family zinc finger 3                                 | Nucleus             |
| -7.957  | ENSG00000123411 | IKZF4       | IKAROS family zinc finger 4                                 | Nucleus             |
| -7.91   | ENSG00000110324 | IL10RA      | interleukin 10 receptor subunit alpha                       | Plasma Membrane     |
| -10.196 | ENSG00000243646 | IL10RB      | interleukin 10 receptor subunit beta                        | Plasma Membrane     |
| -6.156  | ENSG00000223799 | IL10RB-DT   | IL10RB divergent transcript                                 | Other               |
| -4.724  | ENSG00000168811 | IL12A       | interleukin 12A                                             | Extracellular Space |
| -9.668  | ENSG00000096996 | IL12RB1     | interleukin 12 receptor subunit beta 1                      | Plasma Membrane     |
| -7.981  | ENSG00000081985 | IL12RB2     | interleukin 12 receptor subunit beta 2                      | Plasma Membrane     |
| -10.127 | ENSG00000164136 | IL15        | interleukin 15                                              | Extracellular Space |
| -9.476  | ENSG00000134470 | IL15RA      | interleukin 15 receptor subunit alpha                       | Plasma Membrane     |
| -3.227  | ENSG00000177663 | IL17RA      | interleukin 17 receptor A                                   | Plasma Membrane     |
| -6.354  | ENSG00000056736 | IL17RB      | interleukin 17 receptor B                                   | Plasma Membrane     |
| -9.617  | ENSG00000150782 | IL18        | interleukin 18                                              | Extracellular Space |
| -4.632  | ENSG00000137496 | IL18BP      | interleukin 18 binding protein                              | Extracellular Space |
| -10.124 | ENSG00000115604 | IL18R1      | interleukin 18 receptor 1                                   | Plasma Membrane     |
| -11.47  | ENSG00000115607 | IL18RAP     | interleukin 18 receptor accessory protein                   | Plasma Membrane     |
| -4.597  | ENSG00000125538 | IL1B        | interleukin 1 beta                                          | Extracellular Space |
| -10.792 | ENSG00000115590 | IL1R2       | interleukin 1 receptor type 2                               | Plasma Membrane     |
| -8.643  | ENSG00000115602 | IL1RL1      | interleukin 1 receptor like 1                               | Plasma Membrane     |
| -9.095  | ENSG00000103522 | IL21R       | interleukin 21 receptor                                     | Plasma Membrane     |
| -6.425  | ENSG00000110944 | IL23A       | interleukin 23 subunit alpha                                | Extracellular Space |
| -5.177  | ENSG00000104998 | IL27RA      | interleukin 27 receptor subunit alpha                       | Plasma Membrane     |
| -7.782  | ENSG00000134460 | IL2RA       | interleukin 2 receptor subunit alpha                        | Plasma Membrane     |
| -12.392 | ENSG00000100385 | IL2RB       | interleukin 2 receptor subunit beta                         | Plasma Membrane     |
| -11.959 | ENSG00000147168 | IL2RG       | interleukin 2 receptor subunit gamma                        | Plasma Membrane     |
| -9.235  | ENSG00000185291 | IL3RA       | interleukin 3 receptor subunit alpha                        | Plasma Membrane     |
| -6.2    | ENSG00000104951 | IL4I1       | interleukin 4 induced 1                                     | Cytoplasm           |
| -7.402  | ENSG00000091181 | IL5RA       | interleukin 5 receptor subunit alpha                        | Plasma Membrane     |
| -6.777  | ENSG00000104432 | IL7         | interleukin 7                                               | Extracellular Space |
| -13.676 | ENSG00000168685 | IL7R        | interleukin 7 receptor                                      | Plasma Membrane     |
| -5.581  | ENSG00000226942 | IL9RP3      | interleukin 9 receptor pseudogene 3                         | Other               |
| -8.07   | ENSG00000267100 | ILF3-DT     | ILF3 divergent transcript                                   | Other               |
| -6.949  | ENSG00000148950 | IMMP1L      | inner mitochondrial membrane peptidase subunit 1            | Cytoplasm           |
| -9.408  | ENSG00000177971 | IMP3        | IMP U3 small nucleolar ribonucleoprotein 3                  | Cytoplasm           |
| -7.323  | ENSG00000257704 | INAFM1      | InaF motif containing 1                                     | Other               |
| -6.108  | ENSG00000224975 | INE1        | inactivation escape 1                                       | Other               |

|         |                 |                           |                                                                                       |                     |
|---------|-----------------|---------------------------|---------------------------------------------------------------------------------------|---------------------|
| -10.387 | ENSG00000122641 | INHBA                     | inhibin subunit beta A                                                                | Extracellular Space |
| -7.538  | ENSG00000153391 | INO80C                    | INO80 complex subunit C                                                               | Nucleus             |
| -8.29   | ENSG00000151689 | INPP1                     | inositol polyphosphate-1-phosphatase                                                  | Cytoplasm           |
| -8.567  | ENSG00000168918 | INPP5D                    | inositol polyphosphate-5-phosphatase D                                                | Cytoplasm           |
| -5.553  | ENSG00000248099 | INSL3                     | insulin like 3                                                                        | Extracellular Space |
| -3.935  | ENSG00000149262 | INTS4                     | integrator complex subunit 4                                                          | Nucleus             |
| -8.637  | ENSG00000185085 | INTS5                     | integrator complex subunit 5                                                          | Nucleus             |
| -8.67   | ENSG00000104299 | INTS9                     | integrator complex subunit 9                                                          | Nucleus             |
| -7.352  | ENSG00000269837 | IPO5P1                    | importin 5 pseudogene 1                                                               | Other               |
| -5.494  | ENSG00000166578 | IQCD                      | IQ motif containing D                                                                 | Other               |
| -2.377  | ENSG00000140575 | IQGAP1                    | IQ motif containing GTPase activating protein 1                                       | Cytoplasm           |
| -8.902  | ENSG00000124313 | IQSEC2                    | IQ motif and Sec7 domain 2                                                            | Cytoplasm           |
| -10.105 | ENSG00000137265 | IRF4                      | interferon regulatory factor 4                                                        | Nucleus             |
| -11.871 | ENSG00000128604 | IRF5                      | interferon regulatory factor 5                                                        | Nucleus             |
| -10.585 | ENSG00000185507 | IRF7                      | interferon regulatory factor 7                                                        | Nucleus             |
| -12.575 | ENSG00000140968 | IRF8                      | interferon regulatory factor 8                                                        | Nucleus             |
| -8.576  | ENSG00000213928 | IRF9                      | interferon regulatory factor 9                                                        | Nucleus             |
| -6.813  | ENSG00000237693 | IRGM                      | immunity related GTPase M                                                             | Cytoplasm           |
| -5.899  | ENSG00000159556 | ISL2                      | ISL LIM homeobox 2                                                                    | Nucleus             |
| -6.059  | ENSG00000101230 | ISM1                      | isthmin 1                                                                             | Other               |
| -5.584  | ENSG00000143127 | ITGA10                    | integrin subunit alpha 10                                                             | Plasma Membrane     |
| -13.676 | ENSG00000115232 | ITGA4                     | integrin subunit alpha 4                                                              | Plasma Membrane     |
| -2.794  | ENSG00000161638 | ITGA5                     | integrin subunit alpha 5                                                              | Plasma Membrane     |
| -6.256  | ENSG00000135424 | ITGA7                     | integrin subunit alpha 7                                                              | Plasma Membrane     |
| -13.759 | ENSG00000005844 | ITGAL                     | integrin subunit alpha L                                                              | Plasma Membrane     |
| -6.439  | ENSG00000169896 | ITGAM                     | integrin subunit alpha M                                                              | Plasma Membrane     |
| -5.272  | ENSG00000140678 | ITGAX                     | integrin subunit alpha X                                                              | Plasma Membrane     |
| -6.497  | ENSG00000147166 | ITGB1BP2                  | integrin subunit beta 1 binding protein 2                                             | Other               |
| -15.699 | ENSG00000160255 | ITGB2                     | integrin subunit beta 2                                                               | Plasma Membrane     |
| -10.907 | ENSG00000227039 | ITGB2-AS1                 | ITGB2 antisense RNA 1                                                                 | Other               |
| -11.032 | ENSG00000139626 | ITGB7                     | integrin subunit beta 7                                                               | Plasma Membrane     |
| -11.093 | ENSG00000113263 | ITK                       | IL2 inducible T cell kinase                                                           | Cytoplasm           |
| -8.088  | ENSG00000179914 | ITLN1                     | intelectin 1                                                                          | Plasma Membrane     |
| -6.21   | ENSG00000228382 | ITPKB-IT1                 | ITPKB intronic transcript 1                                                           | Other               |
| -7.85   | ENSG00000198885 | ITPRIP1                   | ITPRIP like 1                                                                         | Other               |
| -9.189  | ENSG00000176049 | JAKMIP2                   | janus kinase and microtubule interacting protein 2                                    | Extracellular Space |
| -13.908 | ENSG00000160593 | JAML                      | junction adhesion molecule like                                                       | Plasma Membrane     |
| -10.512 | ENSG00000132465 | JCHAIN                    | joining chain of multimeric IgA and IgM                                               | Extracellular Space |
| -6.443  | ENSG00000243789 | JMJD7                     | jumonji domain containing 7                                                           | Other               |
| -7.55   | ENSG00000168970 | JMJD7-PLA2G4B             | JMJD7-PLA2G4B readthrough                                                             | Cytoplasm           |
| -4.96   | ENSG00000161677 | JOSD2                     | Josephin domain containing 2                                                          | Cytoplasm           |
| -6.451  | ENSG00000186994 | KANK3                     | KN motif and ankyrin repeat domains 3                                                 | Cytoplasm           |
| -6.2    | ENSG00000232593 | KANTR                     | KDM5C adjacent transcript                                                             | Other               |
| -12.129 | ENSG00000065427 | KARS                      | lysyl-tRNA synthetase                                                                 | Cytoplasm           |
| -5.487  | ENSG00000140854 | KATNB1                    | katanin regulatory subunit B1                                                         | Cytoplasm           |
| -5.844  | ENSG00000260949 | KB_1836B51                | chondroitin sulfate proteoglycan 4 pseudogene 3 Y-linked                              | Other               |
| -6.535  | ENSG00000232545 | KB_318B87                 | chondroitin sulfate proteoglycan 4 pseudogene 3 Y-linked                              | Other               |
| -5.992  | ENSG00000176595 | KBTBD11                   | kelch repeat and BTB domain containing 11                                             | Other               |
| -8.478  | ENSG00000163376 | KBTBD8                    | kelch repeat and BTB domain containing 8                                              | Cytoplasm           |
| -5.076  | ENSG00000151079 | KCNA6                     | potassium voltage-gated channel subfamily A member 6                                  | Plasma Membrane     |
| -5.639  | ENSG00000069424 | KCNAB2                    | potassium voltage-gated channel subfamily A regulatory beta subunit 2                 | Plasma Membrane     |
| -7.284  | ENSG00000102057 | KCND1                     | potassium voltage-gated channel subfamily D member 1                                  | Plasma Membrane     |
| -9.578  | ENSG00000180509 | KCNE1                     | potassium voltage-gated channel subfamily E regulatory subunit 1                      | Plasma Membrane     |
| -7.841  | ENSG00000135519 | KCNH3                     | potassium voltage-gated channel subfamily H member 3                                  | Plasma Membrane     |
| -6.129  | ENSG00000120049 | KCNIP2                    | potassium voltage-gated channel interacting protein 2                                 | Plasma Membrane     |
| -9.399  | ENSG00000157551 | KCNJ15                    | potassium voltage-gated channel subfamily J member 15                                 | Plasma Membrane     |
| -5.776  | ENSG00000173338 | KCNK7                     | potassium pore domain channel subfamily K member 7                                    | Plasma Membrane     |
| -5.832  | ENSG00000135643 | KCNMB4                    | potassium calcium-activated channel subfamily M regulatory beta subunit 4             | Plasma Membrane     |
| -8.159  | ENSG00000104783 | KCNNA4                    | potassium calcium-activated channel subfamily N member 4                              | Plasma Membrane     |
| -5.875  | ENSG00000117013 | KCNQ4                     | potassium voltage-gated channel subfamily Q member 4                                  | Plasma Membrane     |
| -7.318  | ENSG00000185760 | KCNQ5                     | potassium voltage-gated channel subfamily Q member 5                                  | Plasma Membrane     |
| -14.044 | ENSG00000178695 | KCTD12                    | potassium channel tetramerization domain containing 12                                | Plasma Membrane     |
| -9.207  | ENSG00000153885 | KCTD15                    | potassium channel tetramerization domain containing 15                                | Other               |
| -8.513  | ENSG00000100379 | KCTD17                    | potassium channel tetramerization domain containing 17                                | Cytoplasm           |
| -8.305  | ENSG00000168301 | KCTD6                     | potassium channel tetramerization domain containing 6                                 | Plasma Membrane     |
| -8.437  | ENSG00000178202 | KDELC2                    | KDEL motif containing 2                                                               | Other               |
| -5.696  | ENSG00000235262 | KDM5C-IT1                 | KDM5C intronic transcript 1                                                           | Other               |
| -5.527  | ENSG00000112232 | KHDRBS2                   | KH RNA binding domain containing, signal transduction associated 2                    | Nucleus             |
| -6.618  | ENSG00000138030 | KHK                       | ketohexokinase                                                                        | Cytoplasm           |
| -10.401 | ENSG00000100578 | KIAA0586                  | KIAA0586                                                                              | Cytoplasm           |
| -8.612  | ENSG00000196123 | KIAA0895L                 | KIAA0895 like                                                                         | Other               |
| -6.275  | ENSG00000196872 | KIAA1211L                 | KIAA1211 like                                                                         | Other               |
| -7.266  | ENSG00000186185 | KIF18B                    | kinesin family member 18B                                                             | Cytoplasm           |
| -7.322  | ENSG00000112984 | KIF20A                    | kinesin family member 20A                                                             | Cytoplasm           |
| -4.54   | ENSG00000116852 | KIF21B                    | kinesin family member 21B                                                             | Cytoplasm           |
| -5.958  | ENSG00000162849 | KIF26B                    | kinesin family member 26B                                                             | Other               |
| -6.45   | ENSG00000227398 | KIF9-AS1                  | KIF9 antisense RNA 1                                                                  | Other               |
| -5.987  | ENSG00000243772 | KIR2DL1/KIR2DL3           | killer cell immunoglobulin like receptor, two Ig domains and long cytoplasmic tail 3  | Plasma Membrane     |
| -5.528  | ENSG00000242473 | KIR2DP1                   | killer cell immunoglobulin like receptor, two Ig domains pseudogene 1                 | Other               |
| -5.64   | ENSG00000221957 | KIR2DS4 (includes others) | killer cell immunoglobulin like receptor, two Ig domains and short cytoplasmic tail 2 | Plasma Membrane     |
| -7.069  | ENSG00000104970 | KIR3DX1                   | killer cell immunoglobulin like receptor, three Ig domains X1                         | Other               |
| -6.853  | ENSG00000157404 | KIT                       | KIT proto-oncogene, receptor tyrosine kinase                                          | Plasma Membrane     |
| -5.952  | ENSG00000133116 | KL                        | klotho                                                                                | Extracellular Space |
| -5.053  | ENSG00000118922 | KLF12                     | Kruppel like factor 12                                                                | Nucleus             |
| -2.531  | ENSG00000169926 | KLF13                     | Kruppel like factor 13                                                                | Nucleus             |
| -3.291  | ENSG00000127528 | KLF2                      | Kruppel like factor 2                                                                 | Nucleus             |
| -1.764  | ENSG00000109787 | KLF3                      | Kruppel like factor 3                                                                 | Nucleus             |
| -7.383  | ENSG00000102349 | KLF8                      | Kruppel like factor 8                                                                 | Nucleus             |
| -7.282  | ENSG00000197776 | KLHDC1                    | kelch domain containing 1                                                             | Cytoplasm           |
| -7.704  | ENSG00000130487 | KLHDC7B                   | kelch domain containing 7B                                                            | Other               |
| -7.862  | ENSG00000187961 | KLHL17                    | kelch like family member 17                                                           | Cytoplasm           |



|         |                 |                |                                                               |                     |
|---------|-----------------|----------------|---------------------------------------------------------------|---------------------|
| -1.861  | ENSG00000114648 | KLHL18         | kelch like family member 18                                   | Other               |
| -5.156  | ENSG00000109466 | KLHL2          | kelch like family member 2                                    | Cytoplasm           |
| -9.543  | ENSG00000099910 | KLHL22         | kelch like family member 22                                   | Cytoplasm           |
| -7.787  | ENSG00000167487 | KLHL26         | kelch like family member 26                                   | Other               |
| -5.991  | ENSG00000227268 | KLLN           | killin, p53 regulated DNA replication inhibitor               | Nucleus             |
| -9.338  | ENSG00000111796 | KLRB1          | killer cell lectin like receptor B1                           | Plasma Membrane     |
| -8.176  | ENSG00000134545 | KLRC1          | killer cell lectin like receptor C1                           | Plasma Membrane     |
| -5.77   | ENSG00000205809 | KLRC2          | killer cell lectin like receptor C2                           | Plasma Membrane     |
| -6.742  | ENSG00000183542 | KLRC4          | killer cell lectin like receptor C4                           | Plasma Membrane     |
| -11.564 | ENSG00000134539 | KLRD1          | killer cell lectin like receptor D1                           | Plasma Membrane     |
| -9.866  | ENSG00000150045 | KLRF1          | killer cell lectin like receptor F1                           | Plasma Membrane     |
| -10.009 | ENSG00000139187 | KLRG1          | killer cell lectin like receptor G1                           | Plasma Membrane     |
| -8.15   | ENSG00000117009 | KMO            | kynurenine 3-monoxygenase                                     | Cytoplasm           |
| -1.509  | ENSG00000167548 | KMT2D          | lysine methyltransferase 2D                                   | Nucleus             |
| -5.908  | ENSG00000171798 | KNDC1          | kinase non-catalytic C-lobe domain containing 1               | Plasma Membrane     |
| -8.881  | ENSG00000147121 | KRBOX4         | KRAB box domain containing 4                                  | Other               |
| -7.371  | ENSG00000256937 | KRT17P8        | keratin 17 pseudogene 8                                       | Other               |
| -6.585  | ENSG00000229222 | KRT18P4        | keratin 18 pseudogene 4                                       | Other               |
| -6.633  | ENSG00000236670 | KRT18P5        | keratin 18 pseudogene 5                                       | Other               |
| -6.54   | ENSG00000108244 | KRT23          | keratin 23                                                    | Cytoplasm           |
| -8.126  | ENSG00000229320 | KRT8P12        | keratin 8 pseudogene 12                                       | Other               |
| -7.526  | ENSG00000163463 | KRTCAP2        | keratinocyte associated protein 2                             | Plasma Membrane     |
| -10.994 | ENSG00000115919 | KYNU           | kynureninase                                                  | Cytoplasm           |
| -8.161  | ENSG00000154655 | L3MBTL4        | L3MBTL histone methyl-lysine binding protein 4                | Other               |
| -6.146  | ENSG00000260316 | LA16C_306A42   | chondroitin sulfate proteoglycan 4 pseudogene 3 Y-linked      | Other               |
| -6.22   | ENSG00000261659 | LA16C_313D1112 | chondroitin sulfate proteoglycan 4 pseudogene 3 Y-linked      | Other               |
| -6.353  | ENSG00000261430 | LA16C_390E63   | chondroitin sulfate proteoglycan 4 pseudogene 3 Y-linked      | Other               |
| -11.061 | ENSG00000167613 | LAIR1          | leukocyte associated immunoglobulin like receptor 1           | Plasma Membrane     |
| -7.185  | ENSG00000167618 | LAIR2          | leukocyte associated immunoglobulin like receptor 2           | Plasma Membrane     |
| -7.529  | ENSG00000196569 | LAMA2          | laminin subunit alpha 2                                       | Extracellular Space |
| -5.8    | ENSG00000196878 | LAMB3          | laminin subunit beta 3                                        | Extracellular Space |
| -5.689  | ENSG00000224699 | LAMTOR5-AS1    | LAMTOR5 antisense RNA 1                                       | Other               |
| -5.873  | ENSG00000162511 | LAPTM5         | lysosomal protein transmembrane 5                             | Plasma Membrane     |
| -5.387  | ENSG00000213658 | LAT            | linker for activation of T cells                              | Plasma Membrane     |
| -12.067 | ENSG00000086730 | LAT2           | linker for activation of T cells family member 2              | Plasma Membrane     |
| -9.22   | ENSG00000122188 | LAX1           | lymphocyte transmembrane adaptor 1                            | Cytoplasm           |
| -8.653  | ENSG00000162194 | LBHD1          | LBH domain containing 1                                       | Other               |
| -4.973  | ENSG00000179528 | LBX2           | ladybird homeobox 2                                           | Nucleus             |
| -6.68   | ENSG00000257702 | LBX2-AS1       | LBX2 antisense RNA 1                                          | Other               |
| -10.996 | ENSG00000182866 | LCK            | LCK proto-oncogene, Src family tyrosine kinase                | Cytoplasm           |
| -4.994  | ENSG00000148346 | LCN2           | lipocalin 2                                                   | Extracellular Space |
| -5.858  | ENSG00000214402 | LCNL1          | lipocalin like 1                                              | Other               |
| -5.846  | ENSG00000136167 | LCP1           | lymphocyte cytosolic protein 1                                | Cytoplasm           |
| -5.86   | ENSG00000187942 | LDLRAD2        | low density lipoprotein receptor class A domain containing 2  | Other               |
| -4.673  | ENSG00000164406 | LEAP2          | liver enriched antimicrobial peptide 2                        | Extracellular Space |
| -9.295  | ENSG00000105617 | LENG1          | leukocyte receptor cluster member 1                           | Other               |
| -6.836  | ENSG00000199165 | let-7          | microRNA let-7i                                               | Cytoplasm           |
| -5.795  | ENSG00000199150 | let-7          | microRNA let-7i                                               | Cytoplasm           |
| -6.772  | ENSG00000165046 | LETM2          | leucine zipper and EF-hand containing transmembrane protein 2 | Other               |
| -5.117  | ENSG00000106003 | LFNG           | LFNG O-fucosylpeptide 3-beta-N-acetylglucosaminyltransferase  | Cytoplasm           |
| -9.373  | ENSG00000100079 | LGALS2         | galectin 2                                                    | Cytoplasm           |
| -11.453 | ENSG00000168961 | LGALS9         | galectin 9                                                    | Plasma Membrane     |
| -8.348  | ENSG00000133067 | LGR6           | leucine rich repeat containing G protein-coupled receptor 6   | Plasma Membrane     |
| -7.324  | ENSG00000121897 | LIAS           | lipic acid synthetase                                         | Cytoplasm           |
| -11.319 | ENSG00000104974 | LILRA1         | leukocyte immunoglobulin like receptor A1                     | Plasma Membrane     |
| -11.578 | ENSG00000239998 | LILRA2         | leukocyte immunoglobulin like receptor A2                     | Plasma Membrane     |
| -6.459  | ENSG00000239961 | LILRA4         | leukocyte immunoglobulin like receptor A4                     | Plasma Membrane     |
| -11.461 | ENSG00000187116 | LILRA5         | leukocyte immunoglobulin like receptor A5                     | Plasma Membrane     |
| -11.203 | ENSG00000244482 | LILRA6         | leukocyte immunoglobulin like receptor A6                     | Plasma Membrane     |
| -11.21  | ENSG00000104972 | LILRB1         | leukocyte immunoglobulin like receptor B1                     | Plasma Membrane     |
| -13.704 | ENSG00000131042 | LILRB2         | leukocyte immunoglobulin like receptor B2                     | Plasma Membrane     |
| -10.865 | ENSG00000204577 | LILRB3         | leukocyte immunoglobulin like receptor B3                     | Plasma Membrane     |
| -4.939  | ENSG00000186818 | LILRB4         | leukocyte immunoglobulin like receptor B4                     | Plasma Membrane     |
| -6.682  | ENSG00000186152 | LILRP1         | leukocyte immunoglobulin-like receptor pseudogene 1           | Other               |
| -12.69  | ENSG00000136490 | LIMD2          | LIM domain containing 2                                       | Other               |
| -5.778  | ENSG00000267796 | LIN37          | lin-37 DREAM MuvB core complex component                      | Nucleus             |
| -8.329  | ENSG00000205659 | LIN52          | lin-52 DREAM MuvB core complex component                      | Nucleus             |
| -6.49   | ENSG00000104863 | LIN7B          | lin-7 homolog B, crumbs cell polarity complex component       | Cytoplasm           |
| -4.38   | ENSG00000183814 | LIN9           | lin-9 DREAM MuvB core complex component                       | Nucleus             |
| -7.927  | ENSG00000246526 | LINC002481     | long intergenic non-protein coding RNA 2481                   | Other               |
| -8.348  | ENSG00000188185 | LINC00265      | long intergenic non-protein coding RNA 265                    | Other               |
| -7.99   | ENSG00000231535 | LINC00278      | long intergenic non-protein coding RNA 278                    | Other               |
| -7.514  | ENSG00000236790 | LINC00299      | long intergenic non-protein coding RNA 299                    | Other               |
| -8.603  | ENSG00000178977 | LINC00324      | long intergenic non-protein coding RNA 324                    | Other               |
| -7.495  | ENSG00000218510 | LINC00339      | long intergenic non-protein coding RNA 339                    | Other               |
| -7.787  | ENSG00000235532 | LINC00402      | long intergenic non-protein coding RNA 402                    | Other               |
| -8.737  | ENSG00000238121 | LINC00426      | long intergenic non-protein coding RNA 426                    | Other               |
| -8.367  | ENSG00000175611 | LINC00476      | long intergenic non-protein coding RNA 476                    | Other               |
| -5.969  | ENSG00000185168 | LINC00482      | long intergenic non-protein coding RNA 482                    | Other               |
| -5.794  | ENSG00000264575 | LINC00526      | long intergenic non-protein coding RNA 526                    | Other               |
| -6.385  | ENSG00000253394 | LINC00534      | long intergenic non-protein coding RNA 534                    | Other               |
| -5.634  | ENSG00000260388 | LINC00562      | long intergenic non-protein coding RNA 562                    | Other               |
| -6.388  | ENSG00000260910 | LINC00565      | long intergenic non-protein coding RNA 565                    | Other               |
| -9.324  | ENSG00000224177 | LINC00570      | long intergenic non-protein coding RNA 570                    | Other               |
| -6.898  | ENSG00000273148 | LINC00653      | long intergenic non-protein coding RNA 653                    | Other               |
| -6.825  | ENSG00000205181 | LINC00654      | long intergenic non-protein coding RNA 654                    | Other               |
| -7.416  | ENSG00000232677 | LINC00665      | long intergenic non-protein coding RNA 665                    | Other               |
| -7.474  | ENSG00000213373 | LINC00671      | long intergenic non-protein coding RNA 671                    | Other               |
| -7.164  | ENSG00000263874 | LINC00672      | long intergenic non-protein coding RNA 672                    | Other               |
| -8.148  | ENSG00000215190 | LINC00680      | chondroitin sulfate proteoglycan 4 pseudogene 3 Y-linked      | Other               |
| -6.866  | ENSG00000178440 | LINC00843      | long intergenic non-protein coding RNA 843                    | Other               |

|         |                 |                             |                                                          |                     |
|---------|-----------------|-----------------------------|----------------------------------------------------------|---------------------|
| -8.091  | ENSG00000231177 | LINC00852                   | long intergenic non-protein coding RNA 852               | Other               |
| -10.601 | ENSG00000245164 | LINC00861                   | long intergenic non-protein coding RNA 861               | Other               |
| -7.813  | ENSG00000224914 | LINC00863                   | long intergenic non-protein coding RNA 863               | Other               |
| -5.272  | ENSG00000232229 | LINC00865                   | long intergenic non-protein coding RNA 865               | Other               |
| -9.211  | ENSG00000241163 | LINC00877                   | long intergenic non-protein coding RNA 877               | Other               |
| -6.693  | ENSG00000240024 | LINC00888                   | long intergenic non-protein coding RNA 888               | Other               |
| -6.268  | ENSG00000233093 | LINC00892                   | long intergenic non-protein coding RNA 892               | Other               |
| -7.335  | ENSG00000241769 | LINC00893                   | long intergenic non-protein coding RNA 893               | Other               |
| -5.941  | ENSG00000231711 | LINC00899                   | long intergenic non-protein coding RNA 899               | Other               |
| -4.863  | ENSG00000246100 | LINC00900                   | long intergenic non-protein coding RNA 900               | Other               |
| -9.024  | ENSG00000264247 | LINC00909                   | long intergenic non-protein coding RNA 909               | Other               |
| -9.453  | ENSG00000247982 | LINC00926                   | long intergenic non-protein coding RNA 926               | Other               |
| -9.989  | ENSG00000226091 | LINC00937                   | long intergenic non-protein coding RNA 937               | Other               |
| -7.599  | ENSG00000256128 | LINC00944                   | long intergenic non-protein coding RNA 944               | Other               |
| -7.992  | ENSG00000228784 | LINC00954                   | long intergenic non-protein coding RNA 954               | Other               |
| -7.414  | ENSG00000235314 | LINC00957                   | long intergenic non-protein coding RNA 957               | Other               |
| -7.074  | ENSG00000246430 | LINC00968                   | long intergenic non-protein coding RNA 968               | Other               |
| -7.501  | ENSG00000237248 | LINC00987                   | long intergenic non-protein coding RNA 987               | Other               |
| -5.848  | ENSG00000242258 | LINC00996                   | long intergenic non-protein coding RNA 996               | Other               |
| -8.805  | ENSG00000230724 | LINC01001 (includes others) | long intergenic non-protein coding RNA 1347              | Other               |
| -6.28   | ENSG00000251442 | LINC01094                   | long intergenic non-protein coding RNA 1094              | Other               |
| -5.829  | ENSG00000236423 | LINC01134                   | long intergenic non-protein coding RNA 1134              | Other               |
| -7.343  | ENSG00000258867 | LINC01146                   | long intergenic non-protein coding RNA 1146              | Other               |
| -6.981  | ENSG00000253819 | LINC01151                   | long intergenic non-protein coding RNA 1151              | Other               |
| -5.955  | ENSG00000231346 | LINC01160                   | long intergenic non-protein coding RNA 1160              | Other               |
| -8.174  | ENSG00000271856 | LINC01215                   | long intergenic non-protein coding RNA 1215              | Other               |
| -7.805  | ENSG00000237940 | LINC01238                   | long intergenic non-protein coding RNA 1238              | Other               |
| -6.857  | ENSG00000227502 | LINC01268                   | long intergenic non-protein coding RNA 1268              | Other               |
| -6.211  | ENSG00000261326 | LINC01355                   | long intergenic non-protein coding RNA 1355              | Other               |
| -9.301  | ENSG00000238113 | LINC01410                   | long intergenic non-protein coding RNA 1410              | Other               |
| -7.717  | ENSG00000223704 | LINC01422                   | long intergenic non-protein coding RNA 1422              | Other               |
| -6.255  | ENSG00000237877 | LINC01473                   | long intergenic non-protein coding RNA 1473              | Other               |
| -7.391  | ENSG00000233901 | LINC01503                   | long intergenic non-protein coding RNA 1503              | Other               |
| -6.196  | ENSG00000225434 | LINC01504                   | long intergenic non-protein coding RNA 1504              | Other               |
| -6.468  | ENSG00000234506 | LINC01506                   | long intergenic non-protein coding RNA 1506              | Other               |
| -6.023  | ENSG00000213888 | LINC01521                   | long intergenic non-protein coding RNA 1521              | Other               |
| -8.303  | ENSG00000246223 | LINC01550                   | long intergenic non-protein coding RNA 1550              | Other               |
| -6.343  | ENSG00000261008 | LINC01572                   | long intergenic non-protein coding RNA 1572              | Other               |
| -7.95   | ENSG00000214900 | LINC01588                   | long intergenic non-protein coding RNA 1588              | Other               |
| -9.744  | ENSG00000257242 | LINC01619                   | long intergenic non-protein coding RNA 1619              | Other               |
| -6.575  | ENSG00000237476 | LINC01637                   | long intergenic non-protein coding RNA 1637              | Other               |
| -6.292  | ENSG00000225331 | LINC01678                   | chondroitin sulfate proteoglycan 4 pseudogene 3 Y-linked | Other               |
| -7.076  | ENSG00000237484 | LINC01684                   | chondroitin sulfate proteoglycan 4 pseudogene 3 Y-linked | Other               |
| -8.633  | ENSG00000226029 | LINC01772                   | long intergenic non-protein coding RNA 1772              | Other               |
| -5.876  | ENSG00000227403 | LINC01806                   | long intergenic non-protein coding RNA 1806              | Other               |
| -5.314  | ENSG00000231826 | LINC01819                   | long intergenic non-protein coding RNA 1819              | Other               |
| -6.191  | ENSG00000235576 | LINC01871                   | long intergenic non-protein coding RNA 1871              | Other               |
| -7.11   | ENSG00000234663 | LINC01934                   | long intergenic non-protein coding RNA 1934              | Other               |
| -7.889  | ENSG00000260804 | LINC01963                   | long intergenic non-protein coding RNA 1963              | Other               |
| -8.018  | ENSG00000267321 | LINC02001                   | long intergenic non-protein coding RNA 2001              | Other               |
| -5.609  | ENSG00000272690 | LINC02018                   | chondroitin sulfate proteoglycan 4 pseudogene 3 Y-linked | Other               |
| -5.399  | ENSG00000273356 | LINC02019                   | chondroitin sulfate proteoglycan 4 pseudogene 3 Y-linked | Other               |
| -6.813  | ENSG00000273033 | LINC02035                   | long intergenic non-protein coding RNA 2035              | Other               |
| -6.394  | ENSG00000272282 | LINC02084                   | chondroitin sulfate proteoglycan 4 pseudogene 3 Y-linked | Other               |
| -5.559  | ENSG00000262155 | LINC02175                   | long intergenic non-protein coding RNA 2175              | Other               |
| -6.174  | ENSG00000258476 | LINC02207                   | long intergenic non-protein coding RNA 2207              | Other               |
| -7.427  | ENSG00000204650 | LINC02210                   | long intergenic non-protein coding RNA 2210              | Other               |
| -6.446  | ENSG00000261064 | LINC02256                   | long intergenic non-protein coding RNA 2256              | Other               |
| -6.416  | ENSG00000245954 | LINC02273                   | long intergenic non-protein coding RNA 2273              | Other               |
| -7.176  | ENSG00000258733 | LINC02328                   | long intergenic non-protein coding RNA 2328              | Other               |
| -7.509  | ENSG00000259448 | LINC02352                   | long intergenic non-protein coding RNA 2352              | Other               |
| -7.154  | ENSG00000256576 | LINC02361                   | long intergenic non-protein coding RNA 2361              | Other               |
| -6.683  | ENSG00000249096 | LINC02362                   | long intergenic non-protein coding RNA 2362              | Other               |
| -8.541  | ENSG00000251301 | LINC02384                   | long intergenic non-protein coding RNA 2384              | Other               |
| -5.994  | ENSG00000256582 | LINC02390                   | chondroitin sulfate proteoglycan 4 pseudogene 3 Y-linked | Other               |
| -6.096  | ENSG00000205056 | LINC02397                   | long intergenic non-protein coding RNA 2397              | Other               |
| -5.759  | ENSG00000255760 | LINC02422                   | long intergenic non-protein coding RNA 2422              | Other               |
| -9.275  | ENSG00000248810 | LINC02432                   | long intergenic non-protein coding RNA 2432              | Other               |
| -7.419  | ENSG00000256039 | LINC02446                   | long intergenic non-protein coding RNA 2446              | Other               |
| -5.694  | ENSG00000245017 | LINC02453                   | long intergenic non-protein coding RNA 2453              | Other               |
| -6.444  | ENSG00000246363 | LINC02458                   | long intergenic non-protein coding RNA 2458              | Other               |
| -6.254  | ENSG00000225231 | LINC02470                   | long intergenic non-protein coding RNA 2470              | Other               |
| -6.559  | ENSG00000226791 | LINC02611                   | long intergenic non-protein coding RNA 2611              | Other               |
| -8.216  | ENSG00000215244 | LINC02649                   | long intergenic non-protein coding RNA 2649              | Other               |
| -6.983  | ENSG00000212743 | LINC02656                   | long intergenic non-protein coding RNA 2656              | Other               |
| -5.115  | ENSG00000253641 | LINC00001                   | uncharacterized LINC00001                                | Other               |
| -5.556  | ENSG00000174482 | LINGO2                      | leucine rich repeat and Ig domain containing 2           | Extracellular Space |
| -5.675  | ENSG00000220008 | LINGO3                      | leucine rich repeat and Ig domain containing 3           | Other               |
| -7.954  | ENSG00000079435 | LIPE                        | lipase E, hormone sensitive type                         | Cytoplasm           |
| -6.502  | ENSG00000213904 | LIPE-AS1                    | LIPE antisense RNA 1                                     | Other               |
| -7.376  | ENSG00000204020 | LIPN                        | lipase family member N                                   | Extracellular Space |
| -7.851  | ENSG00000144182 | LIPT1                       | lipoyltransferase 1                                      | Cytoplasm           |
| -5.957  | ENSG00000239407 | LLOXNC01_237H12             | chondroitin sulfate proteoglycan 4 pseudogene 3 Y-linked | Other               |
| -7.725  | ENSG00000272825 | LL21NC02_1C162              | chondroitin sulfate proteoglycan 4 pseudogene 3 Y-linked | Other               |
| -7.68   | ENSG00000139233 | LLPH                        | LLP homolog, long-term synaptic facilitation factor      | Extracellular Space |
| -10.36  | ENSG00000100258 | LMF2                        | lipase maturation factor 2                               | Other               |
| -7.532  | ENSG00000185522 | LMNTD2                      | lamin tail domain containing 2                           | Other               |
| -9.796  | ENSG00000143013 | LMO4                        | LIM domain only 4                                        | Nucleus             |
| -4.201  | ENSG00000113441 | LNPEP                       | leucyl and cystinyl aminopeptidase                       | Cytoplasm           |
| -4.839  | ENSG00000250274 | LOC100128059                | uncharacterized LOC100128059                             | Other               |
| -7.196  | ENSG00000251143 | LOC100128494                | uncharacterized LOC100128494                             | Other               |

|         |                 |              |                                                             |                     |
|---------|-----------------|--------------|-------------------------------------------------------------|---------------------|
| -6.521  | ENSG00000255441 | LOC100129083 | uncharacterized LOC100129083                                | Other               |
| -7.113  | ENSG00000226180 | LOC100129215 | uncharacterized LOC100129215                                | Other               |
| -5.005  | ENSG00000269896 | LOC100129534 | small nuclear ribonucleoprotein polypeptide N pseudogene    | Other               |
| -6.501  | ENSG00000260276 | LOC100130283 | uncharacterized LOC100130283                                | Other               |
| -6.614  | ENSG00000213963 | LOC100130691 | uncharacterized LOC100130691                                | Other               |
| -6.629  | ENSG00000263843 | LOC100287042 | uncharacterized LOC100287042                                | Other               |
| -4.759  | ENSG00000228606 | LOC100287049 | uncharacterized LOC100287049                                | Other               |
| -5.625  | ENSG00000254837 | LOC100287896 | uncharacterized LOC100287896                                | Other               |
| -6.493  | ENSG00000258940 | LOC100288846 | uncharacterized LOC100288846                                | Other               |
| -7.106  | ENSG00000232528 | LOC100289473 | cytoskeleton associated protein 2-like pseudogene           | Other               |
| -6.39   | ENSG00000239969 | LOC100289561 | uncharacterized LOC100289561                                | Other               |
| -7.783  | ENSG00000250771 | LOC100419170 | toll like receptor 2 pseudogene                             | Other               |
| -6.023  | ENSG00000167912 | LOC100505501 | uncharacterized LOC100505501                                | Other               |
| -7.503  | ENSG00000267040 | LOC100505549 | uncharacterized LOC100505549                                | Other               |
| -7.025  | ENSG00000254887 | LOC100505622 | uncharacterized LOC100505622                                | Other               |
| -5.168  | ENSG00000260735 | LOC100505915 | uncharacterized LOC100505915                                | Other               |
| -5.671  | ENSG00000223478 | LOC100506100 | uncharacterized LOC100506100                                | Other               |
| -8.184  | ENSG00000251364 | LOC100506258 | uncharacterized LOC100506258                                | Other               |
| -6.538  | ENSG00000216895 | LOC100506302 | uncharacterized LOC100506302                                | Other               |
| -9.408  | ENSG00000233038 | LOC100506585 | uncharacterized LOC100506585                                | Other               |
| -6.178  | ENSG00000257176 | LOC100506606 | uncharacterized LOC100506606                                | Other               |
| -6.351  | ENSG00000246090 | LOC100507053 | uncharacterized LOC100507053                                | Other               |
| -5.796  | ENSG00000269439 | LOC100507551 | uncharacterized LOC100507551                                | Other               |
| -6.787  | ENSG00000226824 | LOC100996437 | uncharacterized LOC100996437                                | Other               |
| -8.893  | ENSG00000241860 | LOC100996442 | uncharacterized LOC100996442                                | Other               |
| -6.412  | ENSG00000181908 | LOC100996455 | uncharacterized LOC100996455                                | Other               |
| -7.952  | ENSG00000267575 | LOC101927151 | uncharacterized LOC101927151                                | Other               |
| -5.509  | ENSG00000267698 | LOC101927572 | uncharacterized LOC101927572                                | Other               |
| -4.951  | ENSG00000258731 | LOC101927620 | uncharacterized LOC101927620                                | Other               |
| -5.985  | ENSG00000254718 | LOC101927702 | uncharacterized LOC101927702                                | Other               |
| -5.753  | ENSG00000270049 | LOC101927837 | uncharacterized LOC101927837                                | Other               |
| -7.877  | ENSG00000230910 | LOC101928307 | uncharacterized LOC101928307                                | Other               |
| -6.58   | ENSG00000225891 | LOC101928324 | uncharacterized LOC101928324                                | Other               |
| -7.455  | ENSG00000261222 | LOC101928343 | uncharacterized LOC101928343                                | Other               |
| -7.912  | ENSG00000259319 | LOC101928377 | uncharacterized LOC101928377                                | Other               |
| -6.561  | ENSG00000251323 | LOC101928865 | uncharacterized LOC101928865                                | Other               |
| -5.745  | ENSG00000224307 | LOC101929331 | uncharacterized LOC101929331                                | Other               |
| -5.392  | ENSG00000226659 | LOC101929574 | uncharacterized LOC101929574                                | Other               |
| -5.704  | ENSG00000245213 | LOC101930370 | uncharacterized LOC101930370                                | Other               |
| -5.5    | ENSG00000247199 | LOC102546294 | uncharacterized LOC102546294                                | Other               |
| -6.037  | ENSG00000233184 | LOC102606465 | uncharacterized LOC102606465                                | Other               |
| -6.384  | ENSG00000271109 | LOC102723540 | uncharacterized LOC102723540                                | Other               |
| -7.072  | ENSG00000225032 | LOC102723566 | uncharacterized LOC102723566                                | Other               |
| -7.211  | ENSG00000272758 | LOC102723582 | uncharacterized LOC102723582                                | Other               |
| -7.35   | ENSG00000228801 | LOC102724330 | uncharacterized LOC102724330                                | Other               |
| -5.853  | ENSG00000227373 | LOC102724601 | uncharacterized LOC102724601                                | Other               |
| -4.62   | ENSG00000258727 | LOC102724814 | uncharacterized LOC102724814                                | Other               |
| -7.028  | ENSG00000230155 | LOC102725201 | uncharacterized LOC102725201                                | Other               |
| -5.741  | ENSG00000250508 | LOC105369364 | uncharacterized LOC105369364                                | Other               |
| -6.498  | ENSG00000255929 | LOC105369438 | uncharacterized LOC105369438                                | Other               |
| -6.174  | ENSG00000255422 | LOC105369519 | chondroitin sulfate proteoglycan 4 pseudogene 3 Y-linked    | Other               |
| -6.314  | ENSG00000246790 | LOC105369536 | chondroitin sulfate proteoglycan 4 pseudogene 3 Y-linked    | Other               |
| -7.061  | ENSG00000261136 | LOC105370941 | uncharacterized LOC105370941                                | Other               |
| -6.411  | ENSG00000266036 | LOC105371893 | uncharacterized LOC105371893                                | Other               |
| -6.99   | ENSG00000267751 | LOC105372233 | chondroitin sulfate proteoglycan 4 pseudogene 3 Y-linked    | Other               |
| -6.731  | ENSG00000268516 | LOC105372482 | uncharacterized LOC105372482                                | Other               |
| -6.16   | ENSG00000234072 | LOC105374363 | chondroitin sulfate proteoglycan 4 pseudogene 3 Y-linked    | Other               |
| -5.865  | ENSG00000227014 | LOC105375215 | chondroitin sulfate proteoglycan 4 pseudogene 3 Y-linked    | Other               |
| -6.165  | ENSG00000253948 | LOC105375666 | uncharacterized LOC105375666                                | Other               |
| -7.294  | ENSG00000254006 | LOC105375878 | chondroitin sulfate proteoglycan 4 pseudogene 3 Y-linked    | Other               |
| -6.921  | ENSG00000238142 | LOC105376805 | chondroitin sulfate proteoglycan 4 pseudogene 3 Y-linked    | Other               |
| -7.839  | ENSG00000239636 | LOC105378645 | chondroitin sulfate proteoglycan 4 pseudogene 3 Y-linked    | Other               |
| -6.82   | ENSG00000231680 | LOC107984366 | uncharacterized LOC107984366                                | Other               |
| -7.266  | ENSG00000235530 | LOC107984969 | chondroitin sulfate proteoglycan 4 pseudogene 3 Y-linked    | Other               |
| -8.402  | ENSG00000266962 | LOC108783654 | uncharacterized LOC108783654                                | Other               |
| -7.13   | ENSG00000255284 | LOC171391    | uncharacterized LOC171391                                   | Other               |
| -8.526  | ENSG00000233392 | LOC200772    | uncharacterized LOC200772                                   | Other               |
| -4.875  | ENSG00000250303 | LOC283140    | uncharacterized LOC283140                                   | Other               |
| -9.538  | ENSG00000267121 | LOC339192    | uncharacterized LOC339192                                   | Other               |
| -5.742  | ENSG00000212978 | LOC339803    | uncharacterized LOC339803                                   | Other               |
| -7.762  | ENSG00000250608 | LOC339874    | uncharacterized LOC339874                                   | Other               |
| -9.852  | ENSG00000256594 | LOC374443    | C-type lectin domain family 2 member D pseudogene           | Other               |
| -8.046  | ENSG00000224152 | LOC643072    | uncharacterized LOC643072                                   | Other               |
| -9.564  | ENSG00000260078 | LOC643802    | u3 small nucleolar ribonucleoprotein protein MPP10-like     | Other               |
| -9.24   | ENSG00000245958 | LOC645513    | septin 7 pseudogene                                         | Other               |
| -8.16   | ENSG00000241014 | LOC653160    | uncharacterized LOC653160                                   | Other               |
| -5.723  | ENSG00000170089 | LOC728554    | THO complex 3 pseudogene                                    | Other               |
| -7.491  | ENSG00000188002 | LOC728613    | programmed cell death 6 pseudogene                          | Other               |
| -9.489  | ENSG00000213073 | LOC729603    | calcineurin like EF-hand protein 1 pseudogene               | Other               |
| -6.06   | ENSG00000227741 | LOC729867    | uncharacterized LOC729867                                   | Other               |
| -9.167  | ENSG00000175556 | LONRF3       | LON peptidase N-terminal domain and ring finger 3           | Other               |
| -6.285  | ENSG00000261801 | LOXL1-AS1    | LOXL1 antisense RNA 1                                       | Other               |
| -7.533  | ENSG00000134013 | LOXL2        | lysyl oxidase like 2                                        | Extracellular Space |
| -7.098  | ENSG00000213071 | LPAL2        | lipoprotein(a) like 2, pseudogene                           | Other               |
| -7.436  | ENSG00000198121 | LPAR1        | lysophosphatidic acid receptor 1                            | Plasma Membrane     |
| -9.669  | ENSG00000064547 | LPAR2        | lysophosphatidic acid receptor 2                            | Plasma Membrane     |
| -10.166 | ENSG00000139679 | LPAR6        | lysophosphatidic acid receptor 6                            | Plasma Membrane     |
| -7.374  | ENSG00000175445 | LPL          | lipoprotein lipase                                          | Cytoplasm           |
| -11.023 | ENSG00000110031 | LPXN         | leupaxin                                                    | Cytoplasm           |
| -8.825  | ENSG00000171236 | LRG1         | leucine rich alpha-2-glycoprotein 1                         | Extracellular Space |
| -4.694  | ENSG00000155530 | LRGUK        | leucine rich repeats and guanylate kinase domain containing | Cytoplasm           |

|         |                  |                             |                                                                    |                     |
|---------|------------------|-----------------------------|--------------------------------------------------------------------|---------------------|
| -9.074  | ENSG00000121931  | LRF1                        | ligand dependent nuclear receptor interacting factor 1             | Nucleus             |
| -9.711  | ENSG00000123384  | LRP1                        | LDL receptor related protein 1                                     | Plasma Membrane     |
| -5.01   | ENSG00000172731  | LRRCC20                     | leucine rich repeat containing 20                                  | Other               |
| -6.826  | ENSG00000010626  | LRRCC23                     | leucine rich repeat containing 23                                  | Plasma Membrane     |
| -11.895 | ENSG00000175489  | LRRCC25                     | leucine rich repeat containing 25                                  | Other               |
| -8.539  | ENSG00000168904  | LRRCC28                     | leucine rich repeat containing 28                                  | Other               |
| -6.433  | ENSG00000125122  | LRRCC29                     | leucine rich repeat containing 29                                  | Other               |
| -9.449  | ENSG00000230069  | LRRCC37A15P                 | chondroitin sulfate proteoglycan 4 pseudogene 3 Y-linked           | Other               |
| -8.035  | ENSG00000263142  | LRRCC37A17P                 | leucine rich repeat containing 37 member A17, pseudogene           | Other               |
| -6.562  | ENSG00000176681  | LRRCC37A3 (includes others) | leucine rich repeat containing 37 member A3                        | Other               |
| -7.026  | ENSG00000250462  | LRRCC37BP1                  | leucine rich repeat containing 37B pseudogene 1                    | Other               |
| -9.687  | ENSG00000128594  | LRRCC4                      | leucine rich repeat containing 4                                   | Plasma Membrane     |
| -9.06   | ENSG00000066557  | LRRCC40                     | leucine rich repeat containing 40                                  | Nucleus             |
| -5.19   | ENSG00000161328  | LRRCC56                     | leucine rich repeat containing 56                                  | Other               |
| -7.899  | ENSG00000129295  | LRRCC6                      | leucine rich repeat containing 6                                   | Cytoplasm           |
| -6.141  | ENSG00000214954  | LRRCC69                     | leucine rich repeat containing 69                                  | Other               |
| -5.778  | ENSG00000178026  | LRRCC75B                    | leucine rich repeat containing 75B                                 | Other               |
| -5.953  | ENSG00000231999  | LRRCC8C-DT                  | LRRCC8C divergent transcript                                       | Other               |
| -14.196 | ENSG00000188906  | LRRK2                       | leucine rich repeat kinase 2                                       | Cytoplasm           |
| -8.542  | ENSG00000175928  | LRRN1                       | leucine rich repeat neuronal 1                                     | Other               |
| -8.828  | ENSG00000204392  | LSM2                        | LSM2 homolog, U6 small nuclear RNA and mRNA degradation associated | Nucleus             |
| -7.618  | ENSG00000130592  | LSP1                        | lymphocyte specific protein 1                                      | Cytoplasm           |
| -7.519  | ENSG00000204482  | LST1                        | leukocyte specific transcript 1                                    | Plasma Membrane     |
| -6.168  | ENSG00000226979  | LTA                         | lymphotoxin alpha                                                  | Extracellular Space |
| -10.437 | ENSG00000227507  | LTB                         | lymphotoxin beta                                                   | Extracellular Space |
| -4.434  | ENSG00000213903  | LTB4R                       | leukotriene B4 receptor                                            | Plasma Membrane     |
| -7.489  | ENSG00000119681  | LTBP2                       | latent transforming growth factor beta binding protein 2           | Extracellular Space |
| -10.322 | ENSG00000090006  | LTBP4                       | latent transforming growth factor beta binding protein 4           | Extracellular Space |
| -16.289 | ENSG00000012223  | LTF                         | lactotransferrin                                                   | Extracellular Space |
| -5.97   | ENSG00000062524  | LTK                         | leukocyte receptor tyrosine kinase                                 | Plasma Membrane     |
| -7.343  | ENSG00000248323  | LUCAT1                      | lung cancer associated transcript 1                                | Other               |
| -6.95   | ENSG00000240053  | LY6GSB                      | lymphocyte antigen 6 family member G5B                             | Other               |
| -9.781  | ENSG00000054219  | LY75                        | lymphocyte antigen 75                                              | Plasma Membrane     |
| -9.814  | ENSG00000112799  | LY86                        | lymphocyte antigen 86                                              | Plasma Membrane     |
| -9.892  | ENSG00000122224  | LY9                         | lymphocyte antigen 9                                               | Plasma Membrane     |
| -8.409  | ENSG00000154589  | LY96                        | lymphocyte antigen 96                                              | Plasma Membrane     |
| -2.082  | ENSG00000254087  | LYN                         | LYN proto-oncogene, Src family tyrosine kinase                     | Cytoplasm           |
| -7.004  | ENSG00000180155  | LYNX1                       | Ly6/neurotoxin 1                                                   | Plasma Membrane     |
| -4.371  | ENSG00000186687  | LYRM7                       | LYR motif containing 7                                             | Cytoplasm           |
| -7.669  | ENSG00000232859  | LYRM9                       | LYR motif containing 9                                             | Other               |
| -16.996 | ENSG00000090382  | LYZ                         | lysozyme                                                           | Extracellular Space |
| -7.081  | ENSG00000061337  | LZTS1                       | leucine zipper tumor suppressor 1                                  | Nucleus             |
| -5.858  | ENSG00000159374  | M1AP                        | meiosis 1 associated protein                                       | Cytoplasm           |
| -5.797  | ENSG00000133315  | MACROD1                     | mono-ADP ribosylhydrolase 1                                        | Cytoplasm           |
| -5.34   | ENSG00000172264  | MACROD2                     | mono-ADP ribosylhydrolase 2                                        | Nucleus             |
| -7.68   | ENSG00000162972  | MAIP1                       | matrix AAA peptidase interacting protein 1                         | Cytoplasm           |
| -6.455  | ENSG00000111837  | MAK                         | male germ cell associated kinase                                   | Cytoplasm           |
| -8.948  | ENSG00000172005  | MAL                         | mal, T cell differentiation protein                                | Plasma Membrane     |
| -7.3    | ENSG00000013619  | MAMLD1                      | mastermind like domain containing 1                                | Nucleus             |
| -9.451  | ENSG00000117643  | MAN1C1                      | mannosidase alpha class 1C member 1                                | Cytoplasm           |
| -2.098  | ENSG00000109323  | MANBA                       | mannosidase beta                                                   | Cytoplasm           |
| -8.351  | ENSG00000101363  | MANBAL                      | mannosidase beta like                                              | Other               |
| -7.78   | ENSG00000261366  | MANEA-DT                    | MANEA divergent transcript                                         | Other               |
| -7.836  | ENSG00000212916  | MAP10                       | microtubule associated protein 10                                  | Extracellular Space |
| -2.037  | ENSG00000034152  | MAP2K3                      | mitogen-activated protein kinase kinase 3                          | Cytoplasm           |
| -7.004  | ENSG00000137764  | MAP2K5                      | mitogen-activated protein kinase kinase 5                          | Cytoplasm           |
| -10.296 | ENSG00000108984  | MAP2K6                      | mitogen-activated protein kinase kinase 6                          | Cytoplasm           |
| -3.594  | ENSG00000095015  | MAP3K1                      | mitogen-activated protein kinase kinase kinase 1                   | Cytoplasm           |
| -9.205  | ENSG00000139625  | MAP3K12                     | mitogen-activated protein kinase kinase kinase 12                  | Cytoplasm           |
| -5.668  | ENSG00000267278  | MAP3K14-AS1                 | MAP3K14 antisense RNA 1                                            | Other               |
| -6.704  | ENSG00000180815  | MAP3K15                     | mitogen-activated protein kinase kinase kinase 15                  | Other               |
| -7.443  | ENSG00000143674  | MAP3K21                     | mitogen-activated protein kinase kinase kinase 21                  | Other               |
| -7.997  | ENSG00000234608  | MAPKAPKS-AS1                | MAPKAPKS antisense RNA 1                                           | Other               |
| -12.478 | ENSG00000145416  | 1-Mar                       | membrane associated ring-CH-type finger 1                          | Cytoplasm           |
| -10.322 | ENSG00000019169  | MARCO                       | macrophage receptor with collagenous structure                     | Plasma Membrane     |
| -7.444  | ENSG00000247626  | MARS2                       | methionyl-tRNA synthetase 2, mitochondrial                         | Cytoplasm           |
| -9.456  | ENSG00000155254  | MARVELD1                    | MARVEL domain containing 1                                         | Other               |
| -10.815 | ENSG00000007264  | MATK                        | megakaryocyte-associated tyrosine kinase                           | Cytoplasm           |
| -7.442  | ENSG00000186056  | MATN1-AS1                   | MATN1 antisense RNA 1                                              | Other               |
| -5.9    | ENSG00000132561  | MATN2                       | matrilin 2                                                         | Extracellular Space |
| -7.549  | ENSG00000180611  | MB21D2                      | Mab-21 domain containing 2                                         | Other               |
| -6.236  | ENSG00000214309  | MBLAC1                      | metallo-beta-lactamase domain containing 1                         | Other               |
| -7.859  | ENSG00000176055  | MBLAC2                      | metallo-beta-lactamase domain containing 2                         | Cytoplasm           |
| -10.417 | ENSG00000172197  | MBOAT1                      | membrane bound O-acetyltransferase domain containing 1             | Cytoplasm           |
| -9.085  | ENSG00000012174  | MBTPS2                      | membrane bound transcription factor peptidase, site 2              | Cytoplasm           |
| -7.021  | ENSG00000258839  | MC1R                        | melanocortin 1 receptor                                            | Plasma Membrane     |
| -9.988  | ENSG00000183019  | MCEMP1                      | mast cell expressed membrane protein 1                             | Cytoplasm           |
| -5.493  | ENSG00000101977  | MCF2                        | MCF2 cell line derived transforming sequence                       | Cytoplasm           |
| -10.585 | ENSG000000909674 | MCOLN1                      | mucopolipin 1                                                      | Cytoplasm           |
| -8.418  | ENSG00000153898  | MCOLN2                      | mucopolipin 2                                                      | Plasma Membrane     |
| -5.391  | ENSG00000147316  | MCPH1                       | microcephalin 1                                                    | Nucleus             |
| -8.017  | ENSG00000172366  | MCRIP2                      | MAPK regulated corepressor interacting protein 2                   | Cytoplasm           |
| -6.013  | ENSG00000101898  | MCTS2P                      | MCTS family member 2, pseudogene                                   | Other               |
| -10.214 | ENSG00000005059  | MCUB                        | mitochondrial calcium uniporter dominant negative beta subunit     | Cytoplasm           |
| -7.442  | ENSG00000262402  | MCUR1P1                     | MCUR1 pseudogene 1                                                 | Other               |
| -11.466 | ENSG00000135272  | MDFC                        | MyoD family inhibitor domain containing                            | Nucleus             |
| -10.108 | ENSG00000014641  | MDH1                        | malate dehydrogenase 1                                             | Cytoplasm           |
| -7.022  | ENSG00000151376  | ME3                         | malic enzyme 3                                                     | Cytoplasm           |
| -7      | ENSG000000042429 | MED17                       | mediator complex subunit 17                                        | Nucleus             |
| -7.191  | ENSG00000108590  | MED31                       | mediator complex subunit 31                                        | Nucleus             |
| -4.216  | ENSG00000136146  | MED4                        | mediator complex subunit 4                                         | Nucleus             |

|         |                 |             |                                                                             |                     |
|---------|-----------------|-------------|-----------------------------------------------------------------------------|---------------------|
| -12.744 | ENSG00000103313 | MEFV        | MEFV innate immunity regulator, pyrin                                       | Nucleus             |
| -5.57   | ENSG00000106780 | MEGF9       | multiple EGF like domains 9                                                 | Extracellular Space |
| -8.056  | ENSG00000167077 | MEI1        | meiotic double-stranded break formation protein 1                           | Other               |
| -11.41  | ENSG00000176845 | METRNL      | meteorin like, glial cell differentiation regulator                         | Cytoplasm           |
| -9.156  | ENSG00000144401 | METTL21A    | methyltransferase like 21A                                                  | Nucleus             |
| -6.319  | ENSG00000250878 | METTL21EP   | methyltransferase like 21E, pseudogene                                      | Other               |
| -7.45   | ENSG00000181038 | METTL23     | methyltransferase like 23                                                   | Cytoplasm           |
| -8.867  | ENSG00000127720 | METTL25     | methyltransferase like 25                                                   | Extracellular Space |
| -6.188  | ENSG00000161091 | MFSD12      | major facilitator superfamily domain containing 12                          | Cytoplasm           |
| -7.85   | ENSG00000138111 | MFSD13A     | major facilitator superfamily domain containing 13A                         | Other               |
| -9.299  | ENSG00000196312 | MFSD14C     | major facilitator superfamily domain containing 14C                         | Other               |
| -7.215  | ENSG00000168389 | MFSD2A      | major facilitator superfamily domain containing 2A                          | Plasma Membrane     |
| -6.047  | ENSG00000167700 | MFSD3       | major facilitator superfamily domain containing 3                           | Other               |
| -8.22   | ENSG00000182544 | MFSD5       | major facilitator superfamily domain containing 5                           | Other               |
| -8.722  | ENSG00000135953 | MFSD9       | major facilitator superfamily domain containing 9                           | Other               |
| -5.637  | ENSG00000257335 | MGAM        | maltae-glucoamylase                                                         | Plasma Membrane     |
| -6.533  | ENSG00000257743 | MGAM2       | maltae-glucoamylase 2 (putative)                                            | Other               |
| -4.823  | ENSG00000131446 | MGAT1       | mannosyl (alpha-1,3-)-glycoprotein beta-1,2-N-acetylglucosaminyltransferase | Cytoplasm           |
| -5.232  | ENSG00000071073 | MGAT4A      | alpha-1,3-mannosyl-glycoprotein 4-beta-N-acetylglucosaminyltransferase A    | Cytoplasm           |
| -7.701  | ENSG00000266709 | MGC12916    | uncharacterized protein MGC12916                                            | Other               |
| -7.261  | ENSG00000246731 | MGC16275    | uncharacterized protein MGC16275                                            | Other               |
| -9.046  | ENSG00000244625 | MIATNB      | MIAT neighbor                                                               | Other               |
| -8.816  | ENSG00000204520 | MICA        | MHC class I polypeptide-related sequence A                                  | Plasma Membrane     |
| -10.021 | ENSG00000204516 | MICB        | MHC class I polypeptide-related sequence B                                  | Plasma Membrane     |
| -6.734  | ENSG00000273340 | MICE        | MHC class I polypeptide-related sequence E (pseudogene)                     | Other               |
| -7.196  | ENSG00000173436 | MICOS10     | mitochondrial contact site and cristae organizing system subunit 10         | Cytoplasm           |
| -8.198  | ENSG00000174917 | MICOS13     | mitochondrial contact site and cristae organizing system subunit 13         | Cytoplasm           |
| -6.904  | ENSG00000165175 | MID1P1      | MID1 interacting protein 1                                                  | Cytoplasm           |
| -6.856  | ENSG00000080561 | MID2        | midline 2                                                                   | Cytoplasm           |
| -5.817  | ENSG00000218537 | MIF-AS1     | MIF antisense RNA 1                                                         | Other               |
| -7.97   | ENSG00000271605 | MILR1       | mast cell immunoglobulin like receptor 1                                    | Other               |
| -7.342  | ENSG00000169330 | MINAR1      | membrane integral NOTCH2 associated receptor 1                              | Plasma Membrane     |
| -5.39   | ENSG00000253716 | MINCR       | MYC-induced long non-coding RNA                                             | Other               |
| -6.22   | ENSG00000233325 | MIPEPP3     | mitochondrial intermediate peptidase pseudogene 3                           | Other               |
| -6.668  | ENSG00000221792 | mir-1282    | microRNA 1282                                                               | Cytoplasm           |
| -5.69   | ENSG00000222831 | mir-1537    | microRNA 1537                                                               | Cytoplasm           |
| -4.922  | ENSG00000199121 | mir-26      | microRNA 26b                                                                | Cytoplasm           |
| -5.632  | ENSG00000263628 | mir-3155    | microRNA 3155a                                                              | Cytoplasm           |
| -6.888  | ENSG00000263831 | mir-378     | microRNA 378a                                                               | Cytoplasm           |
| -7.761  | ENSG00000266017 | mir-4477    | microRNA 4477b                                                              | Cytoplasm           |
| -5.577  | ENSG00000265694 | mir-4774    | microRNA 4774                                                               | Cytoplasm           |
| -5.627  | ENSG00000207650 | mir-548     | microRNA 579                                                                | Cytoplasm           |
| -5.058  | ENSG00000207546 | mir-548     | microRNA 579                                                                | Cytoplasm           |
| -7.07   | ENSG00000207750 | mir-553     | microRNA 553                                                                | Cytoplasm           |
| -6.569  | ENSG00000207741 | mir-590     | microRNA 590                                                                | Cytoplasm           |
| -5.822  | ENSG00000207719 | mir-623     | microRNA 623                                                                | Cytoplasm           |
| -6.539  | ENSG00000208018 | mir-645     | microRNA 645                                                                | Cytoplasm           |
| -6.108  | ENSG00000221184 | MIR1254-1   | chondroitin sulfate proteoglycan 4 pseudogene 3 Y-linked                    | Other               |
| -9.16   | ENSG00000229989 | MIR181A1HG  | MIR181A1 host gene                                                          | Other               |
| -5.861  | ENSG00000270069 | MIR222HG    | chondroitin sulfate proteoglycan 4 pseudogene 3 Y-linked                    | Other               |
| -4.664  | ENSG00000265396 | MIR3128     | microRNA 3128                                                               | Cytoplasm           |
| -5.191  | ENSG00000263813 | MIR3679     | microRNA 3679                                                               | Cytoplasm           |
| -6.154  | ENSG00000265806 | MIR4292     | microRNA 4292                                                               | Cytoplasm           |
| -6.945  | ENSG00000265195 | MIR4312     | microRNA 4312                                                               | Cytoplasm           |
| -7.456  | ENSG00000268471 | MIR4453HG   | MIR4453 host gene                                                           | Other               |
| -6.907  | ENSG00000266305 | MIR4518     | microRNA 4518                                                               | Cytoplasm           |
| -6.386  | ENSG00000263712 | MIR4639     | microRNA 4639                                                               | Cytoplasm           |
| -6.197  | ENSG00000264616 | MIR4755     | microRNA 4755                                                               | Cytoplasm           |
| -6.793  | ENSG00000264268 | MIR4767     | microRNA 4767                                                               | Cytoplasm           |
| -5.183  | ENSG00000223749 | MIR503HG    | MIR503 host gene                                                            | Other               |
| -5.245  | ENSG00000266097 | MIR5192     | microRNA 5192                                                               | Other               |
| -7.789  | ENSG00000264653 | MIR5194     | microRNA 5194                                                               | Other               |
| -8.491  | ENSG00000228340 | MIR646HG    | MIR646 host gene                                                            | Other               |
| -6.466  | ENSG00000260083 | MIR762HG    | MIR762 host gene                                                            | Other               |
| -3.325  | ENSG00000129534 | MIS18BP1    | MIS18 binding protein 1                                                     | Nucleus             |
| -5.987  | ENSG00000224430 | MKRN5P      | makorin ring finger protein 5, pseudogene                                   | Other               |
| -6.974  | ENSG00000213190 | MLLT11      | MLLT11 transcription factor 7 cofactor                                      | Cytoplasm           |
| -9.218  | ENSG00000103150 | MLYCD       | malonyl-CoA decarboxylase                                                   | Cytoplasm           |
| -9.234  | ENSG00000198598 | MMP17       | matrix metalloproteinase 17                                                 | Extracellular Space |
| -14.303 | ENSG00000118113 | MMP8        | matrix metalloproteinase 8                                                  | Extracellular Space |
| -14.33  | ENSG00000100985 | MMP9        | matrix metalloproteinase 9                                                  | Extracellular Space |
| -6.654  | ENSG00000169184 | MN1         | MN1 proto-oncogene, transcriptional regulator                               | Nucleus             |
| -15.092 | ENSG00000163563 | MNDA        | myeloid cell nuclear differentiation antigen                                | Nucleus             |
| -7.407  | ENSG00000164077 | MON1A       | MON1 homolog A, secretory trafficking associated                            | Cytoplasm           |
| -5.108  | ENSG00000231154 | MORF4L2-AS1 | MORF4L2 antisense RNA 1                                                     | Other               |
| -6.766  | ENSG00000116151 | MORN1       | MORN repeat containing 1                                                    | Other               |
| -8.329  | ENSG00000185716 | MOSMO       | modulator of smoothened                                                     | Other               |
| -4.312  | ENSG00000106330 | MOSPD3      | motile sperm domain containing 3                                            | Other               |
| -14.878 | ENSG00000197629 | MPEG1       | macrophage expressed 1                                                      | Cytoplasm           |
| -13.188 | ENSG0000005381  | MPO         | myeloperoxidase                                                             | Cytoplasm           |
| -6.282  | ENSG00000254858 | MPV17L2     | MPV17 mitochondrial inner membrane protein like 2                           | Cytoplasm           |
| -6.882  | ENSG00000158887 | MPZ         | myelin protein zero                                                         | Plasma Membrane     |
| -6.338  | ENSG00000153029 | MR1         | major histocompatibility complex, class I-related                           | Plasma Membrane     |
| -7.629  | ENSG00000158186 | MRAS        | muscle RAS oncogene homolog                                                 | Plasma Membrane     |
| -5.634  | ENSG00000011028 | MRC2        | mannose receptor C type 2                                                   | Plasma Membrane     |
| -5.735  | ENSG00000101353 | MROH8       | maestro heat like repeat family member 8                                    | Other               |
| -8.726  | ENSG00000169288 | MRPL1       | mitochondrial ribosomal protein L1                                          | Cytoplasm           |
| -7.671  | ENSG00000180992 | MRPL14      | mitochondrial ribosomal protein L14                                         | Cytoplasm           |
| -4.587  | ENSG00000112651 | MRPL2       | mitochondrial ribosomal protein L2                                          | Extracellular Space |
| -7.268  | ENSG00000224870 | MRPL20-AS1  | MRPL20 antisense RNA 1                                                      | Other               |
| -9.348  | ENSG00000197345 | MRPL21      | mitochondrial ribosomal protein L21                                         | Cytoplasm           |

|         |                  |          |                                                                    |                     |
|---------|------------------|----------|--------------------------------------------------------------------|---------------------|
| -8.617  | ENSG000000082515 | MRPL22   | mitochondrial ribosomal protein L22                                | Cytoplasm           |
| -8.153  | ENSG00000130312  | MRPL34   | mitochondrial ribosomal protein L34                                | Cytoplasm           |
| -6.526  | ENSG00000204316  | MRPL38   | mitochondrial ribosomal protein L38                                | Cytoplasm           |
| -8.243  | ENSG00000154719  | MRPL39   | mitochondrial ribosomal protein L39                                | Cytoplasm           |
| -8.277  | ENSG00000105364  | MRPL4    | mitochondrial ribosomal protein L4                                 | Cytoplasm           |
| -9.253  | ENSG00000055950  | MRPL43   | mitochondrial ribosomal protein L43                                | Cytoplasm           |
| -6.847  | ENSG00000228782  | MRPL45P2 | mitochondrial ribosomal protein L45 pseudogene 2                   | Other               |
| -9.276  | ENSG00000136522  | MRPL47   | mitochondrial ribosomal protein L47                                | Cytoplasm           |
| -9.291  | ENSG00000175581  | MRPL48   | mitochondrial ribosomal protein L48                                | Cytoplasm           |
| -8.507  | ENSG00000162910  | MRPL55   | mitochondrial ribosomal protein L55                                | Cytoplasm           |
| -9.224  | ENSG00000181991  | MRPS11   | mitochondrial ribosomal protein S11                                | Cytoplasm           |
| -4.977  | ENSG00000062582  | MRPS24   | mitochondrial ribosomal protein S24                                | Cytoplasm           |
| -5.67   | ENSG00000147586  | MRPS28   | mitochondrial ribosomal protein S28                                | Cytoplasm           |
| -7.154  | ENSG00000243406  | MRPS31P5 | mitochondrial ribosomal protein S31 pseudogene 5                   | Other               |
| -8.774  | ENSG00000134056  | MRPS36   | mitochondrial ribosomal protein S36                                | Cytoplasm           |
| -10.074 | ENSG00000156738  | MS4A1    | membrane spanning 4-domains A1                                     | Plasma Membrane     |
| -10.053 | ENSG00000166928  | MS4A14   | membrane spanning 4-domains A14                                    | Other               |
| -7.385  | ENSG00000149534  | MS4A2    | membrane spanning 4-domains A2                                     | Plasma Membrane     |
| -11.459 | ENSG00000149516  | MS4A3    | membrane spanning 4-domains A3                                     | Plasma Membrane     |
| -8.6    | ENSG00000110079  | MS4A4A   | membrane spanning 4-domains A4A                                    | Cytoplasm           |
| -7.899  | ENSG00000214787  | MS4A4E   | membrane spanning 4-domains A4E                                    | Other               |
| -13.078 | ENSG00000110077  | MS4A6A   | membrane spanning 4-domains A6A                                    | Other               |
| -11.924 | ENSG00000166927  | MS4A7    | membrane spanning 4-domains A7                                     | Other               |
| -7.978  | ENSG00000120458  | MSANTD2  | Myb/SANT DNA binding domain containing 2                           | Other               |
| -6.343  | ENSG00000204410  | MSH5     | mutS homolog 5                                                     | Nucleus             |
| -10.206 | ENSG00000038945  | MSR1     | macrophage scavenger receptor 1                                    | Plasma Membrane     |
| -11.851 | ENSG00000198736  | MSRB1    | methionine sulfoxide reductase B1                                  | Nucleus             |
| -7.993  | ENSG00000148450  | MSRB2    | methionine sulfoxide reductase B2                                  | Cytoplasm           |
| -7.909  | ENSG00000166343  | MSS51    | MSS51 mitochondrial translational activator                        | Other               |
| -8.577  | ENSG00000210127  | MT-TA    | tRNA                                                               | Cytoplasm           |
| -5.197  | ENSG00000210194  | MT-TE    | tRNA                                                               | Cytoplasm           |
| -7.849  | ENSG00000210151  | MT-TS1   | tRNA                                                               | Cytoplasm           |
| -9.148  | ENSG00000210117  | MT-TW    | tRNA                                                               | Cytoplasm           |
| -6.719  | ENSG00000169715  | MT1E     | metallothionein 1E                                                 | Other               |
| -6.293  | ENSG00000198417  | MT1F     | metallothionein 1F                                                 | Other               |
| -5.609  | ENSG00000187193  | MT1X     | metallothionein 1X                                                 | Other               |
| -9.719  | ENSG00000125148  | MT2A     | metallothionein 2A                                                 | Cytoplasm           |
| -2.415  | ENSG00000149480  | MTA2     | metastasis associated 1 family member 2                            | Nucleus             |
| -8.185  | ENSG00000224083  | MTCO1P11 | chondroitin sulfate proteoglycan 4 pseudogene 3 Y-linked           | Other               |
| -3.972  | ENSG00000237973  | MTCO1P12 | MT-CO1 pseudogene 12                                               | Other               |
| -6.675  | ENSG00000235917  | MTCO2P11 | chondroitin sulfate proteoglycan 4 pseudogene 3 Y-linked           | Other               |
| -6.465  | ENSG00000237711  | MTCO3P11 | chondroitin sulfate proteoglycan 4 pseudogene 3 Y-linked           | Other               |
| -6.558  | ENSG00000259671  | MTCYBP23 | chondroitin sulfate proteoglycan 4 pseudogene 3 Y-linked           | Other               |
| -6.481  | ENSG00000232373  | MTCYBP3  | MT-CYB pseudogene 3                                                | Other               |
| -9.127  | ENSG00000127989  | MTERF1   | mitochondrial transcription termination factor 1                   | Cytoplasm           |
| -11.756 | ENSG00000188786  | MTF1     | metal regulatory transcription factor 1                            | Nucleus             |
| -6.189  | ENSG00000175701  | MTLN     | mitoregulin                                                        | Cytoplasm           |
| -7.631  | ENSG00000228166  | MTND1P11 | MT-ND1 pseudogene 11                                               | Other               |
| -7.136  | ENSG00000230225  | MTND5P14 | MT-ND5 pseudogene 14                                               | Other               |
| -6.673  | ENSG00000229622  | MTND5P2  | MT-ND5 pseudogene 2                                                | Other               |
| -7.601  | ENSG00000259379  | MTND5P32 | chondroitin sulfate proteoglycan 4 pseudogene 3 Y-linked           | Other               |
| -7.105  | ENSG00000227730  | MTND6P5  | MT-ND6 pseudogene 5                                                | Other               |
| -8.927  | ENSG00000107951  | MTPAP    | mitochondrial poly(A) polymerase                                   | Cytoplasm           |
| -8.774  | ENSG00000141971  | MVB12A   | multivesicular body subunit 12A                                    | Cytoplasm           |
| -12.334 | ENSG00000183486  | MX2      | MX dynamin like GTPase 2                                           | Nucleus             |
| -9.519  | ENSG00000213347  | MXD3     | MAX dimerization protein 3                                         | Nucleus             |
| -11.908 | ENSG00000185697  | MYB11    | MYB proto-oncogene like 1                                          | Nucleus             |
| -7.616  | ENSG00000134571  | MYBPC3   | myosin binding protein C, cardiac                                  | Cytoplasm           |
| -9.905  | ENSG00000116990  | MYCL     | MYCL proto-oncogene, bHLH transcription factor                     | Nucleus             |
| -7.391  | ENSG00000109063  | MYH3     | myosin heavy chain 3                                               | Cytoplasm           |
| -11.619 | ENSG00000142347  | MYO1F    | myosin IF                                                          | Cytoplasm           |
| -13.897 | ENSG00000136286  | MYO1G    | myosin IG                                                          | Cytoplasm           |
| -8.716  | ENSG00000137474  | MYO7A    | myosin VIIA                                                        | Cytoplasm           |
| -9.186  | ENSG00000036448  | MYOM2    | myomesin 2                                                         | Cytoplasm           |
| -5.753  | ENSG00000170476  | MZB1     | marginal zone B and B1 cell specific protein                       | Extracellular Space |
| -8.191  | ENSG00000204899  | MZT1     | mitotic spindle organizing protein 1                               | Cytoplasm           |
| -5.202  | ENSG00000145911  | N4BP3    | NEDD4 binding protein 3                                            | Cytoplasm           |
| -7.181  | ENSG00000156239  | N6AMT1   | N-6 adenine-specific DNA methyltransferase 1                       | Cytoplasm           |
| -8.628  | ENSG00000122390  | NAA60    | N(alpha)-acetyltransferase 60, NatF catalytic subunit              | Cytoplasm           |
| -7.231  | ENSG00000168060  | NAALADL1 | N-acetylated alpha-linked acidic dipeptidase like 1                | Plasma Membrane     |
| -4.385  | ENSG00000148411  | NACC2    | NACC family member 2                                               | Nucleus             |
| -4.192  | ENSG00000124357  | NAGK     | N-acetylglucosamine kinase                                         | Cytoplasm           |
| -9.843  | ENSG00000103174  | NAGPA    | N-acetylglucosamine-1-phosphodiester alpha-N-acetylglucosaminidase | Cytoplasm           |
| -5.488  | ENSG00000161653  | NAGS     | N-acetylglutamate synthase                                         | Cytoplasm           |
| -10.932 | ENSG00000249437  | NAIP     | NLR family apoptosis inhibitory protein                            | Cytoplasm           |
| -6.541  | ENSG00000237065  | NANOGP4  | Nanog homeobox pseudogene 4                                        | Other               |
| -8.063  | ENSG00000186462  | NAP1L2   | nucleosome assembly protein 1 like 2                               | Nucleus             |
| -7.071  | ENSG00000186310  | NAP1L3   | nucleosome assembly protein 1 like 3                               | Nucleus             |
| -9.031  | ENSG00000177173  | NAP1L4P1 | nucleosome assembly protein 1 like 4 pseudogene 1                  | Other               |
| -6.811  | ENSG00000177432  | NAP1L5   | nucleosome assembly protein 1 like 5                               | Other               |
| -5.075  | ENSG00000268061  | NAPA-AS1 | NAPA antisense RNA 1                                               | Other               |
| -9.742  | ENSG00000131401  | NAPSB    | napsin B aspartic peptidase, pseudogene                            | Other               |
| -6.324  | ENSG00000266236  | NARF-IT1 | NARF intronic transcript 1                                         | Other               |
| -7.211  | ENSG00000171428  | NAT1     | N-acetyltransferase 1                                              | Cytoplasm           |
| -7.808  | ENSG00000198496  | NBR2     | neighbor of BRCA1 lncRNA 2                                         | Other               |
| -10.404 | ENSG00000149294  | NCAM1    | neural cell adhesion molecule 1                                    | Plasma Membrane     |
| -12.794 | ENSG00000158517  | NCF1     | neutrophil cytosolic factor 1                                      | Cytoplasm           |
| -11.718 | ENSG00000182487  | NCF1B    | neutrophil cytosolic factor 1B pseudogene                          | Other               |
| -11.316 | ENSG00000165178  | NCF1C    | neutrophil cytosolic factor 1C pseudogene                          | Cytoplasm           |
| -14.341 | ENSG00000116701  | NCF2     | neutrophil cytosolic factor 2                                      | Cytoplasm           |
| -5.276  | ENSG00000100365  | NCF4     | neutrophil cytosolic factor 4                                      | Cytoplasm           |

|         |                 |            |                                                                                                |                     |
|---------|-----------------|------------|------------------------------------------------------------------------------------------------|---------------------|
| -8.929  | ENSG00000189430 | NCR1       | natural cytotoxicity triggering receptor 1                                                     | Plasma Membrane     |
| -7.17   | ENSG00000204475 | NCR3       | natural cytotoxicity triggering receptor 3                                                     | Plasma Membrane     |
| -5.694  | ENSG00000188211 | NCR3LG1    | natural killer cell cytotoxicity receptor 3 ligand 1                                           | Plasma Membrane     |
| -7.745  | ENSG00000166507 | NDST2      | N-deacetylase and N-sulfotransferase 2                                                         | Cytoplasm           |
| -7.687  | ENSG00000237037 | NDUFA6-DT  | NDUFA6 divergent transcript                                                                    | Other               |
| -7.862  | ENSG00000139180 | NDUFA9     | NADH:ubiquinone oxidoreductase subunit A9                                                      | Cytoplasm           |
| -9.459  | ENSG00000101247 | NDUFAF5    | NADH:ubiquinone oxidoreductase complex assembly factor 5                                       | Cytoplasm           |
| -4.402  | ENSG00000003509 | NDUFAF7    | NADH:ubiquinone oxidoreductase complex assembly factor 7                                       | Cytoplasm           |
| -5.905  | ENSG00000240889 | NDUFB2-AS1 | NDUFB2 antisense RNA 1                                                                         | Other               |
| -5.432  | ENSG00000166136 | NDUFB8     | NADH:ubiquinone oxidoreductase subunit B8                                                      | Cytoplasm           |
| -8.676  | ENSG00000109390 | NDUFC1     | NADH:ubiquinone oxidoreductase subunit C1                                                      | Cytoplasm           |
| -10.194 | ENSG00000115286 | NDUFS7     | NADH:ubiquinone oxidoreductase core subunit S7                                                 | Cytoplasm           |
| -8.132  | ENSG00000183091 | NEB        | nebulin                                                                                        | Cytoplasm           |
| -10.104 | ENSG00000069869 | NEDD4      | neural precursor cell expressed, developmentally down-regulated 4, E3 ubiquitin protein ligase | Cytoplasm           |
| -6.693  | ENSG00000172260 | NEGR1      | neuronal growth regulator 1                                                                    | Plasma Membrane     |
| -9.983  | ENSG00000109674 | NEIL3      | nei like DNA glycosylase 3                                                                     | Nucleus             |
| -5.834  | ENSG00000163491 | NEK10      | NIMA related kinase 10                                                                         | Other               |
| -2.434  | ENSG00000119638 | NEK9       | NIMA related kinase 9                                                                          | Nucleus             |
| -9.611  | ENSG00000185049 | NELFA      | negative elongation factor complex member A                                                    | Nucleus             |
| -8.924  | ENSG00000184613 | NELL2      | neural EGFL like 2                                                                             | Extracellular Space |
| -8.599  | ENSG00000189362 | NEMP2      | nuclear envelope integral membrane protein 2                                                   | Other               |
| -6.03   | ENSG00000166342 | NETO1      | neuropilin and tolloid like 1                                                                  | Extracellular Space |
| -8.113  | ENSG00000171208 | NETO2      | neuropilin and tolloid like 2                                                                  | Plasma Membrane     |
| -9.329  | ENSG00000162139 | NEU3       | neuraminidase 3                                                                                | Plasma Membrane     |
| -12.991 | ENSG00000235568 | NFAM1      | NFAT activating protein with ITAM motif 1                                                      | Plasma Membrane     |
| -10.907 | ENSG00000167604 | NFKBID     | NFKB inhibitor delta                                                                           | Nucleus             |
| -8.316  | ENSG00000244005 | NFS1       | NFS1 cysteine desulfurase                                                                      | Cytoplasm           |
| -7.274  | ENSG00000272145 | NYFC-AS1   | NYFC antisense RNA 1                                                                           | Other               |
| -5.617  | ENSG00000064300 | NGFR       | nerve growth factor receptor                                                                   | Plasma Membrane     |
| -11.196 | ENSG00000204131 | NHSL2      | NHS like 2                                                                                     | Other               |
| -8.16   | ENSG00000145029 | NICN1      | nicotin 1                                                                                      | Nucleus             |
| -8.297  | ENSG00000236859 | NIFK-AS1   | NIFK antisense RNA 1                                                                           | Other               |
| -8.668  | ENSG00000132603 | NIP7       | nucleolar pre-rRNA processing protein NIP7                                                     | Nucleus             |
| -5.138  | ENSG00000165028 | NIPSNAP3B  | nipsnap homolog 3B                                                                             | Other               |
| -6.156  | ENSG00000189134 | NKAPL      | NFKB activating protein like                                                                   | Other               |
| -12.734 | ENSG00000105374 | NKG7       | natural killer cell granule protein 7                                                          | Plasma Membrane     |
| -5.917  | ENSG00000169992 | NLGN2      | neuroligin 2                                                                                   | Plasma Membrane     |
| -5.786  | ENSG00000196338 | NLGN3      | neuroligin 3                                                                                   | Plasma Membrane     |
| -11.518 | ENSG00000167984 | NLRC3      | NLR family CARD domain containing 3                                                            | Cytoplasm           |
| -10.265 | ENSG00000091106 | NLRC4      | NLR family CARD domain containing 4                                                            | Cytoplasm           |
| -1.781  | ENSG00000140853 | NLRC5      | NLR family CARD domain containing 5                                                            | Cytoplasm           |
| -13.833 | ENSG00000091592 | NLRP1      | NLR family pyrin domain containing 1                                                           | Cytoplasm           |
| -11.078 | ENSG00000142405 | NLRP12     | NLR family pyrin domain containing 12                                                          | Cytoplasm           |
| -11.403 | ENSG00000162711 | NLRP3      | NLR family pyrin domain containing 3                                                           | Cytoplasm           |
| -6.806  | ENSG00000174885 | NLRP6      | NLR family pyrin domain containing 6                                                           | Plasma Membrane     |
| -5.784  | ENSG00000239672 | NME1       | NME/NM23 nucleoside diphosphate kinase 1                                                       | Cytoplasm           |
| -7.89   | ENSG00000103024 | NME3       | NME/NM23 nucleoside diphosphate kinase 3                                                       | Cytoplasm           |
| -7.595  | ENSG00000143156 | NME7       | NME/NM23 family member 7                                                                       | Cytoplasm           |
| -8.418  | ENSG00000086288 | NME8       | NME/NM23 family member 8                                                                       | Cytoplasm           |
| -6.141  | ENSG00000123609 | NMI        | N-myc and STAT interactor                                                                      | Cytoplasm           |
| -9.242  | ENSG00000171596 | NMUR1      | neuremedin U receptor 1                                                                        | Plasma Membrane     |
| -8.927  | ENSG00000184967 | NOC4L      | nucleolar complex associated 4 homolog                                                         | Nucleus             |
| -10.728 | ENSG00000167207 | NOD2       | nucleotide binding oligomerization domain containing 2                                         | Cytoplasm           |
| -6.54   | ENSG00000237522 | NONOP2     | non-POU domain containing, octamer-binding pseudogene 2                                        | Other               |
| -2.052  | ENSG00000134250 | NOTCH2     | notch receptor 2                                                                               | Plasma Membrane     |
| -9.172  | ENSG00000215440 | NPEPL1     | aminopeptidase like 1                                                                          | Nucleus             |
| -4.166  | ENSG00000234719 | NPIP8      | nuclear pore complex interacting protein family, member B2                                     | Nucleus             |
| -3.945  | ENSG00000169246 | NPIP8      | nuclear pore complex interacting protein family member B4                                      | Nucleus             |
| -5.61   | ENSG00000219085 | NPM1P37    | nucleophosmin 1 pseudogene 37                                                                  | Other               |
| -5.719  | ENSG00000107833 | NPM3       | nucleophosmin/nucleoplamin 3                                                                   | Nucleus             |
| -7.567  | ENSG00000025434 | NR1H3      | nuclear receptor subfamily 1 group H member 3                                                  | Nucleus             |
| -4.206  | ENSG00000177463 | NR2C2      | nuclear receptor subfamily 2 group C member 2                                                  | Nucleus             |
| -6.949  | ENSG00000184162 | NR2C2AP    | nuclear receptor 2C2 associated protein                                                        | Nucleus             |
| -5.82   | ENSG00000248008 | NRAV       | negative regulator of antiviral response                                                       | Other               |
| -3.964  | ENSG00000119720 | NRDE2      | NRDE-2, necessary for RNA interference, domain containing                                      | Other               |
| -7.042  | ENSG00000225964 | NRIR       | chondroitin sulfate proteoglycan 4 pseudogene 3 Y-linked                                       | Other               |
| -6.351  | ENSG00000129535 | NRL        | neural retina leucine zipper                                                                   | Nucleus             |
| -8.845  | ENSG00000137404 | NRM        | nurim                                                                                          | Nucleus             |
| -5.06   | ENSG00000124785 | NRN1       | neuritin 1                                                                                     | Cytoplasm           |
| -10.672 | ENSG00000174004 | NRR0S      | negative regulator of reactive oxygen species                                                  | Cytoplasm           |
| -6.091  | ENSG00000260075 | NSFP1      | N-ethylmaleimide-sensitive factor pseudogene 1                                                 | Other               |
| -6.237  | ENSG00000235613 | NSRP1P1    | nuclear speckle splicing regulatory protein 1 pseudogene 1                                     | Other               |
| -5.906  | ENSG00000178694 | NSUN3      | NOP2/Sun RNA methyltransferase family member 3                                                 | Cytoplasm           |
| -5.744  | ENSG00000117481 | NSUN4      | NOP2/Sun RNA methyltransferase family member 4                                                 | Cytoplasm           |
| -5.881  | ENSG00000135318 | NT5E       | 5'-nucleotidase ecto                                                                           | Plasma Membrane     |
| -6.427  | ENSG00000065057 | NTHL1      | nth like DNA glycosylase 1                                                                     | Nucleus             |
| -6.545  | ENSG00000101188 | NTSR1      | neurotensin receptor 1                                                                         | Plasma Membrane     |
| -4.91   | ENSG00000163545 | NUAK2      | NUAK family kinase 2                                                                           | Other               |
| -4.299  | ENSG00000151413 | NUBPL      | nucleotide binding protein like                                                                | Cytoplasm           |
| -6.779  | ENSG00000235191 | NUCB1-AS1  | NUCB1 antisense RNA 1                                                                          | Other               |
| -5.571  | ENSG00000166321 | NUDT13     | nudix hydrolase 13                                                                             | Cytoplasm           |
| -3.174  | ENSG00000198585 | NUDT16     | nudix hydrolase 16                                                                             | Nucleus             |
| -7.492  | ENSG00000246082 | NUDT16P1   | nudix hydrolase 16 pseudogene 1                                                                | Other               |
| -5.496  | ENSG00000140876 | NUDT7      | nudix hydrolase 7                                                                              | Cytoplasm           |
| -8.042  | ENSG00000189233 | NUGGC      | nuclear GTPase, germinal center associated                                                     | Nucleus             |
| -7.883  | ENSG00000075188 | NUP37      | nucleoporin 37                                                                                 | Nucleus             |
| -8.355  | ENSG00000226328 | NUP50-DT   | NUP50 divergent transcript                                                                     | Other               |
| -4.305  | ENSG00000144815 | NXP6E      | neurexophilin and PC-esterase domain family member 3                                           | Other               |
| -6.647  | ENSG00000132661 | NXT1       | nuclear transport factor 2 like export factor 1                                                | Nucleus             |
| -5.697  | ENSG00000205978 | NYNRIN     | NYN domain and retroviral integrase containing                                                 | Other               |
| -9.364  | ENSG00000184232 | OAF        | out at first homolog                                                                           | Cytoplasm           |

|         |                 |               |                                                                 |                     |
|---------|-----------------|---------------|-----------------------------------------------------------------|---------------------|
| -7.767  | ENSG00000089127 | OAS1          | 2'-5'-oligoadenylate synthetase 1                               | Cytoplasm           |
| -8.333  | ENSG00000135114 | OASL          | 2'-5'-oligoadenylate synthetase like                            | Cytoplasm           |
| -8.499  | ENSG00000099330 | OCELL1        | occludin/ELL domain containing 1                                | Other               |
| -6.912  | ENSG00000262180 | OCLM          | oculomedin                                                      | Other               |
| -10.31  | ENSG00000177989 | ODF3B         | outer dense fiber of sperm tails 3B                             | Other               |
| -5.688  | ENSG00000111325 | OGFOD2        | 2-oxoglutarate and iron dependent oxygenase domain containing 2 | Other               |
| -13.864 | ENSG00000102837 | OLFM4         | olfactomedin 4                                                  | Extracellular Space |
| -7.343  | ENSG00000162745 | OLFML2B       | olfactomedin like 2B                                            | Extracellular Space |
| -10.713 | ENSG00000173391 | OLR1          | oxidized low density lipoprotein receptor 1                     | Plasma Membrane     |
| -4.869  | ENSG00000178814 | OPLAH         | 5-oxoprolinase, ATP-hydrolysing                                 | Cytoplasm           |
| -8.955  | ENSG00000054277 | OPN3          | opsin 3                                                         | Plasma Membrane     |
| -8.478  | ENSG00000125510 | OPRL1         | opioid related nociceptin receptor 1                            | Plasma Membrane     |
| -6.63   | ENSG00000196071 | OR2L13        | olfactory receptor family 2 subfamily L member 13               | Plasma Membrane     |
| -5.73   | ENSG00000237272 | ORS1R1P       | olfactory receptor family 51 subfamily R member 1 pseudogene    | Other               |
| -7.544  | ENSG00000225101 | ORS2K3P       | olfactory receptor family 52 subfamily K member 3 pseudogene    | Other               |
| -5.628  | ENSG00000238152 | OR7E140P      | olfactory receptor family 7 subfamily E member 140 pseudogene   | Other               |
| -6.859  | ENSG00000183444 | OR7E38P       | olfactory receptor family 7 subfamily E member 38 pseudogene    | Other               |
| -8.097  | ENSG00000175938 | ORAI3         | ORAI calcium release-activated calcium modulator 3              | Other               |
| -10.284 | ENSG00000229314 | ORM1          | orosomuroid 1                                                   | Extracellular Space |
| -6.577  | ENSG00000228278 | ORM2          | orosomuroid 2                                                   | Extracellular Space |
| -11.403 | ENSG00000170909 | OSCAR         | osteoclast associated, immunoglobulin-like receptor             | Plasma Membrane     |
| -6.161  | ENSG00000223891 | OSER1-DT      | OSER1 divergent transcript                                      | Other               |
| -7.049  | ENSG00000099985 | OSM           | oncostatin M                                                    | Extracellular Space |
| -5.545  | ENSG00000167770 | OTUB1         | OTU deubiquitinase, ubiquitin aldehyde binding 1                | Cytoplasm           |
| -2.325  | ENSG00000165312 | OTUD1         | OTU deubiquitinase 1                                            | Other               |
| -6.265  | ENSG00000085465 | OVGP1         | oviductal glycoprotein 1                                        | Extracellular Space |
| -11.01  | ENSG00000154814 | OXNAD1        | oxidoreductase NAD binding domain containing 1                  | Cytoplasm           |
| -7.32   | ENSG00000151093 | OXSM          | 3-oxoacyl-ACP synthase, mitochondrial                           | Cytoplasm           |
| -7.206  | ENSG00000083454 | P2RX5         | purinergic receptor P2X 5                                       | Plasma Membrane     |
| -6.195  | ENSG00000257950 | P2RX5-TAX1BP3 | P2RX5-TAX1BP3 readthrough (NMD candidate)                       | Other               |
| -10.158 | ENSG00000089041 | P2RX7         | purinergic receptor P2X 7                                       | Plasma Membrane     |
| -9.007  | ENSG00000078589 | P2RY10        | P2Y receptor family member 10                                   | Plasma Membrane     |
| -11.713 | ENSG00000181631 | P2RY13        | purinergic receptor P2Y13                                       | Plasma Membrane     |
| -7.122  | ENSG00000174944 | P2RY14        | purinergic receptor P2Y14                                       | Plasma Membrane     |
| -8.785  | ENSG00000175591 | P2RY2         | purinergic receptor P2Y2                                        | Plasma Membrane     |
| -12.671 | ENSG00000182162 | P2RY8         | P2Y receptor family member 8                                    | Plasma Membrane     |
| -8.489  | ENSG00000175575 | PAAF1         | proteasomal ATPase associated factor 1                          | Other               |
| -5.235  | ENSG00000230673 | PABPC1P3      | poly(A) binding protein cytoplasmic 1 pseudogene 3              | Other               |
| -8.147  | ENSG00000163138 | PACRGL        | parkin coregulated like                                         | Other               |
| -12.096 | ENSG00000117115 | PADI2         | peptidyl arginine deiminase 2                                   | Cytoplasm           |
| -13.376 | ENSG00000159339 | PADI4         | peptidyl arginine deiminase 4                                   | Cytoplasm           |
| -9.45   | ENSG00000158006 | PAFAH2        | platelet activating factor acetylhydrolase 2                    | Cytoplasm           |
| -7.141  | ENSG00000233892 | PAIP1P1       | poly(A) binding protein interacting protein 1 pseudogene 1      | Other               |
| -8.789  | ENSG00000083093 | PALB2         | partner and localizer of BRCA2                                  | Nucleus             |
| -5.951  | ENSG00000107719 | PALD1         | phosphatase domain containing paladin 1                         | Cytoplasm           |
| -7.522  | ENSG00000217930 | PAM16         | presequence translocase associated motor 16                     | Cytoplasm           |
| -6.501  | ENSG00000100767 | PAPLN         | papilin, proteoglycan like sulfated glycoprotein                | Extracellular Space |
| -1.687  | ENSG00000090060 | PAPOLA        | poly(A) polymerase alpha                                        | Nucleus             |
| -6.051  | ENSG00000160781 | PAQR6         | progesterin and adipoQ receptor family member 6                 | Plasma Membrane     |
| -9.124  | ENSG00000170915 | PAQR8         | progesterin and adipoQ receptor family member 8                 | Plasma Membrane     |
| -2.628  | ENSG00000140694 | PARN          | poly(A)-specific ribonuclease                                   | Nucleus             |
| -2.587  | ENSG00000151883 | PARP8         | poly(ADP-ribose) polymerase family member 8                     | Other               |
| -2.745  | ENSG00000138496 | PARP9         | poly(ADP-ribose) polymerase family member 9                     | Nucleus             |
| -12.652 | ENSG00000138964 | PARVG         | parvin gamma                                                    | Cytoplasm           |
| -6.493  | ENSG00000229474 | PATL2         | PAT1 homolog 2                                                  | Cytoplasm           |
| -9.018  | ENSG00000196092 | PAX5          | paired box 5                                                    | Nucleus             |
| -9.882  | ENSG00000189223 | PAX8-AS1      | PAX8 antisense RNA 1                                            | Other               |
| -7.91   | ENSG00000238197 | PAXBP1-AS1    | PAXBP1 antisense RNA 1                                          | Other               |
| -6.884  | ENSG00000273344 | PAXIP1-AS1    | PAXIP1 antisense RNA 1 (head to head)                           | Other               |
| -8.942  | ENSG00000214106 | PAXIP1-AS2    | PAXIP1 antisense RNA 2                                          | Other               |
| -9.371  | ENSG00000148362 | PAXX          | PAXX non-homologous end joining factor                          | Cytoplasm           |
| -7.782  | ENSG00000105717 | PBX4          | PBX homeobox 4                                                  | Nucleus             |
| -8.608  | ENSG00000132570 | PCBD2         | pterin-4 alpha-carbinolamine dehydratase 2                      | Nucleus             |
| -1.325  | ENSG00000169564 | PCBP1         | poly(rC) binding protein 1                                      | Nucleus             |
| -5.976  | ENSG00000113555 | PCDH12        | protocadherin 12                                                | Plasma Membrane     |
| -5.915  | ENSG00000253305 | PCDHGB6       | protocadherin gamma subfamily B, 6                              | Other               |
| -10.342 | ENSG00000247774 | PCED1B-AS1    | PCED1B antisense RNA 1                                          | Other               |
| -7.131  | ENSG00000258359 | PCNPP1        | PEST containing nuclear protein pseudogene 1                    | Other               |
| -6.788  | ENSG00000106333 | PCOLCE        | procollagen C-endopeptidase enhancer                            | Extracellular Space |
| -8.115  | ENSG00000163710 | PCOLCE2       | procollagen C-endopeptidase enhancer 2                          | Extracellular Space |
| -7.176  | ENSG00000102109 | PCSK1N        | proprotein convertase subtilisin/kexin type 1 inhibitor         | Extracellular Space |
| -10.248 | ENSG00000099139 | PCSK5         | proprotein convertase subtilisin/kexin type 5                   | Extracellular Space |
| -1.989  | ENSG00000160613 | PCSK7         | proprotein convertase subtilisin/kexin type 7                   | Cytoplasm           |
| -6.566  | ENSG00000188389 | PDCD1         | programmed cell death 1                                         | Plasma Membrane     |
| -5.212  | ENSG00000126249 | PDCD2L        | programmed cell death 2 like                                    | Other               |
| -5.888  | ENSG00000203497 | PDCD4-AS1     | PDCD4 antisense RNA 1                                           | Other               |
| -8.686  | ENSG00000123360 | PDE1B         | phosphodiesterase 1B                                            | Cytoplasm           |
| -6.537  | ENSG00000185527 | PDE6G         | phosphodiesterase 6G                                            | Cytoplasm           |
| -5.73   | ENSG00000171408 | PDE7B         | phosphodiesterase 7B                                            | Cytoplasm           |
| -5.234  | ENSG00000258429 | PDF           | peptide deformylase, mitochondrial                              | Cytoplasm           |
| -7.793  | ENSG00000170962 | PDGFD         | platelet derived growth factor D                                | Extracellular Space |
| -8.172  | ENSG00000113721 | PDGFRB        | platelet derived growth factor receptor beta                    | Plasma Membrane     |
| -9.467  | ENSG00000175087 | PDIK1L        | PDLIM1 interacting kinase 1 like                                | Nucleus             |
| -5.863  | ENSG00000241360 | PDXP          | pyridoxal phosphatase                                           | Plasma Membrane     |
| -10.423 | ENSG00000162366 | PDK1IP1       | PDK1 interacting protein 1                                      | Extracellular Space |
| -9.271  | ENSG00000188305 | PEAK3         | PEAK family member 3                                            | Other               |
| -9.246  | ENSG00000115425 | PECR          | peroxisomal trans-2-enoyl-CoA reductase                         | Cytoplasm           |
| -7.484  | ENSG00000133027 | PEMT          | phosphatidylethanolamine N-methyltransferase                    | Cytoplasm           |
| -7.807  | ENSG00000049246 | PER3          | period circadian regulator 3                                    | Nucleus             |
| -9.596  | ENSG00000121680 | PEX16         | peroxisomal biogenesis factor 16                                | Cytoplasm           |
| -4.661  | ENSG00000139197 | PEX5          | peroxisomal biogenesis factor 5                                 | Cytoplasm           |



|         |                 |                 |                                                                             |                     |
|---------|-----------------|-----------------|-----------------------------------------------------------------------------|---------------------|
| -2.245  | ENSG00000123349 | PFDN5           | prefoldin subunit 5                                                         | Nucleus             |
| -3.708  | ENSG00000170525 | PFKFB3          | 6-phosphofructo-2-kinase/fructose-2,6-biphosphatase 3                       | Cytoplasm           |
| -6.089  | ENSG00000233623 | PGAM1P11        | phosphoglycerate mutase 1 pseudogene 11                                     | Other               |
| -5.71   | ENSG00000224464 | PGAM1P6         | phosphoglycerate mutase 1 pseudogene 6                                      | Other               |
| -5.247  | ENSG00000255200 | PGAM1P8         | phosphoglycerate mutase 1 pseudogene 8                                      | Other               |
| -8.063  | ENSG00000197121 | PGAP1           | post-GPI attachment to proteins 1                                           | Cytoplasm           |
| -5.522  | ENSG00000182405 | PGBD4           | piggyBac transposable element derived 4                                     | Other               |
| -12.785 | ENSG00000008438 | PGLYRP1         | peptidoglycan recognition protein 1                                         | Plasma Membrane     |
| -9.132  | ENSG00000184207 | PGP             | phosphoglycolate phosphatase                                                | Cytoplasm           |
| -8.205  | ENSG00000112137 | PHACTR1         | phosphatase and actin regulator 1                                           | Cytoplasm           |
| -6.578  | ENSG00000257246 | PHBP19          | prohibitin pseudogene 19                                                    | Other               |
| -5.105  | ENSG00000232882 | PHKA1P1         | phosphorylase kinase regulatory subunit alpha 1 pseudogene                  | Other               |
| -6.191  | ENSG00000164530 | PI16            | peptidase inhibitor 16                                                      | Extracellular Space |
| -10.445 | ENSG00000038210 | PIAK2B          | phosphatidylinositol 4-kinase type 2 beta                                   | Cytoplasm           |
| -8.826  | ENSG00000177595 | PIDD1           | p53-induced death domain protein 1                                          | Cytoplasm           |
| -5.632  | ENSG00000140451 | PIF1            | PIF1 5'-to-3' DNA helicase                                                  | Nucleus             |
| -9.637  | ENSG00000069943 | PIGB            | phosphatidylinositol glycan anchor biosynthesis class B                     | Cytoplasm           |
| -5.762  | ENSG00000155629 | PIK3AP1         | phosphoinositide-3-kinase adaptor protein 1                                 | Cytoplasm           |
| -13.45  | ENSG00000171608 | PIK3CD          | phosphatidylinositol-4,5-bisphosphate 3-kinase catalytic subunit delta      | Cytoplasm           |
| -5.439  | ENSG00000179840 | PIK3CD-AS1      | PIK3CD antisense RNA 1                                                      | Other               |
| -6.923  | ENSG00000228839 | PIK3IP1-AS1     | PIK3IP1 antisense RNA 1 (head to head)                                      | Other               |
| -11.51  | ENSG00000085514 | PILRA           | paired immunoglobulin like type 2 receptor alpha                            | Plasma Membrane     |
| -9.432  | ENSG00000121716 | PILRB           | paired immunoglobulin-like type 2 receptor beta                             | Plasma Membrane     |
| -2.21   | ENSG00000137193 | PIM1            | Pim-1 proto-oncogene, serine/threonine kinase                               | Cytoplasm           |
| -8.616  | ENSG00000117242 | PINK1-AS        | PINK1 antisense RNA                                                         | Other               |
| -10.242 | ENSG00000107242 | PIP5K1B         | phosphatidylinositol-4-phosphate 5-kinase type 1 beta                       | Cytoplasm           |
| -8.034  | ENSG00000250251 | PKD1P6          | polycystin 1, transient receptor potential channel interacting pseudogene 6 | Other               |
| -6.991  | ENSG00000160447 | PKN3            | protein kinase N3                                                           | Nucleus             |
| -9.442  | ENSG00000184381 | PLA2G6          | phospholipase A2 group VI                                                   | Cytoplasm           |
| -13.193 | ENSG00000145287 | PLAC8           | placenta specific 8                                                         | Nucleus             |
| -9.919  | ENSG00000118495 | PLAGL1          | PLAG1 like zinc finger 1                                                    | Nucleus             |
| -10.804 | ENSG00000011422 | PLAUR           | plasminogen activator, urokinase receptor                                   | Plasma Membrane     |
| -9.597  | ENSG00000163803 | PLB1            | phospholipase B1                                                            | Cytoplasm           |
| -14.773 | ENSG00000121316 | PLBD1           | phospholipase B domain containing 1                                         | Cytoplasm           |
| -8.025  | ENSG00000256751 | PLBD1-AS1       | PLBD1 antisense RNA 1                                                       | Other               |
| -5.99   | ENSG00000225479 | PLCB1-IT1       | PLCB1 intronic transcript 1                                                 | Other               |
| -10.653 | ENSG00000137841 | PLCB2           | phospholipase C beta 2                                                      | Cytoplasm           |
| -9.169  | ENSG00000187091 | PLCD1           | phospholipase C delta 1                                                     | Cytoplasm           |
| -5.273  | ENSG00000197943 | PLCG2           | phospholipase C gamma 2                                                     | Cytoplasm           |
| -9.57   | ENSG00000115896 | PLCL1           | phospholipase C like 1 (inactive)                                           | Cytoplasm           |
| -6.823  | ENSG00000240891 | PLCXD2          | phosphatidylinositol specific phospholipase C X domain containing 2         | Other               |
| -10.188 | ENSG00000129219 | PLD2            | phospholipase D2                                                            | Cytoplasm           |
| -8.227  | ENSG00000166428 | PLD4            | phospholipase D family member 4                                             | Extracellular Space |
| -8.298  | ENSG00000179598 | PLD6            | phospholipase D family member 6                                             | Cytoplasm           |
| -1.591  | ENSG00000178209 | PLEC            | plectin                                                                     | Cytoplasm           |
| -6.248  | ENSG00000175985 | PLEKHD1         | pleckstrin homology and coiled-coil domain containing D1                    | Other               |
| -7.2    | ENSG00000196155 | PLEKHG4         | pleckstrin homology and RhoGEF domain containing G4                         | Other               |
| -6.192  | ENSG00000214176 | PLEKHM1P1       | pleckstrin homology and RUN domain containing M1 pseudogene 1               | Other               |
| -7.285  | ENSG00000107020 | PLGRKT          | plasminogen receptor with a C-terminal lysine                               | Cytoplasm           |
| -10.31  | ENSG00000147872 | PLIN2           | perilipin 2                                                                 | Plasma Membrane     |
| -6.907  | ENSG00000167676 | PLIN4           | perilipin 4                                                                 | Cytoplasm           |
| -5.467  | ENSG00000214456 | PLIN5           | perilipin 5                                                                 | Plasma Membrane     |
| -8.479  | ENSG00000142731 | PLK4            | polo like kinase 4                                                          | Cytoplasm           |
| -10.767 | ENSG00000105520 | PLPPR2          | phospholipid phosphatase related 2                                          | Other               |
| -6.002  | ENSG00000129951 | PLPPR3          | phospholipid phosphatase related 3                                          | Other               |
| -3.842  | ENSG00000188313 | PLSCR1          | phospholipid scramblase 1                                                   | Plasma Membrane     |
| -6.556  | ENSG00000114698 | PLSCR4          | phospholipid scramblase 4                                                   | Plasma Membrane     |
| -9.354  | ENSG00000130300 | PLVAP           | plasmalemma vesicle associated protein                                      | Plasma Membrane     |
| -7.53   | ENSG00000161381 | PLXDC1          | plexin domain containing 1                                                  | Plasma Membrane     |
| -7.426  | ENSG00000136040 | PLXNC1          | plexin C1                                                                   | Plasma Membrane     |
| -12.73  | ENSG00000004399 | PLXND1          | plexin D1                                                                   | Plasma Membrane     |
| -8.93   | ENSG00000160783 | PMF1/PMF1-BGLAP | polyamine modulated factor 1                                                | Nucleus             |
| -6.342  | ENSG00000118557 | PMFBP1          | polyamine modulated factor 1 binding protein 1                              | Cytoplasm           |
| -11.082 | ENSG00000105819 | PMPCB           | peptidase, mitochondrial processing beta subunit                            | Cytoplasm           |
| -6.543  | ENSG00000183837 | PNMA3           | PNMA family member 3                                                        | Extracellular Space |
| -5.738  | ENSG00000168081 | PNOC            | prepronociceptin                                                            | Extracellular Space |
| -6.445  | ENSG00000180316 | PNPLA1          | patatin like phospholipase domain containing 1                              | Cytoplasm           |
| -8.543  | ENSG00000138035 | PNPT1           | polyribonucleotide nucleotidyltransferase 1                                 | Cytoplasm           |
| -4.68   | ENSG00000229241 | PNPT1P1         | polyribonucleotide nucleotidyltransferase 1 pseudogene 1                    | Other               |
| -2.442  | ENSG00000146278 | PNRC1           | proline rich nuclear receptor coactivator 1                                 | Nucleus             |
| -7.21   | ENSG00000189266 | PNRC2           | proline rich nuclear receptor coactivator 2                                 | Nucleus             |
| -6.554  | ENSG00000164087 | POC1A           | POC1 centriolar protein A                                                   | Cytoplasm           |
| -6.227  | ENSG00000270344 | POC1B-AS1       | chondroitin sulfate proteoglycan 4 pseudogene 3 Y-linked                    | Other               |
| -9.035  | ENSG00000152359 | POC5            | POC5 centriolar protein                                                     | Cytoplasm           |
| -9.426  | ENSG00000115350 | POLE4           | DNA polymerase epsilon 4, accessory subunit                                 | Nucleus             |
| -2.384  | ENSG00000140521 | POLG            | DNA polymerase gamma, catalytic subunit                                     | Cytoplasm           |
| -8.736  | ENSG00000170734 | POLH            | DNA polymerase eta                                                          | Nucleus             |
| -6.565  | ENSG00000130997 | POLN            | DNA polymerase nu                                                           | Nucleus             |
| -8.194  | ENSG00000051341 | POLQ            | DNA polymerase theta                                                        | Nucleus             |
| -7.139  | ENSG00000171453 | POLR1C          | RNA polymerase I and III subunit C                                          | Nucleus             |
| -9.677  | ENSG00000102978 | POLR2C          | RNA polymerase II subunit C                                                 | Nucleus             |
| -8.423  | ENSG00000100142 | POLR2F          | RNA polymerase II subunit F                                                 | Nucleus             |
| -7.993  | ENSG00000168255 | POLR2J2/POLR2J3 | RNA polymerase II subunit J2                                                | Other               |
| -6.683  | ENSG00000272655 | POLR2J4         | RNA polymerase II subunit J4, pseudogene                                    | Other               |
| -5.593  | ENSG00000214783 | POLR2J4         | RNA polymerase II subunit J4, pseudogene                                    | Other               |
| -6.316  | ENSG00000113356 | POLR3G          | RNA polymerase III subunit G                                                | Nucleus             |
| -5.81   | ENSG00000115138 | POMC            | proopiomelanocortin                                                         | Extracellular Space |
| -7.191  | ENSG00000146707 | POMZP3          | POM121 and ZP3 fusion                                                       | Nucleus             |
| -8.027  | ENSG00000167272 | POP5            | POP5 homolog, ribonuclease P/MRP subunit                                    | Nucleus             |
| -5.138  | ENSG00000121577 | POPDC2          | popeye domain containing 2                                                  | Plasma Membrane     |
| -7.718  | ENSG00000102312 | PORCN           | porcupine O-acyltransferase                                                 | Cytoplasm           |

|         |                 |            |                                                                          |                     |
|---------|-----------------|------------|--------------------------------------------------------------------------|---------------------|
| -8.701  | ENSG00000128513 | POT1       | protection of telomeres 1                                                | Nucleus             |
| -7.527  | ENSG00000110777 | POU2AF1    | POU class 2 associating factor 1                                         | Nucleus             |
| -5.571  | ENSG00000028277 | POU2F2     | POU class 2 homeobox 2                                                   | Nucleus             |
| -6.584  | ENSG00000130810 | PPAN       | peter pan homolog                                                        | Nucleus             |
| -10.219 | ENSG00000155846 | PPARGC1B   | PPARG coactivator 1 beta                                                 | Nucleus             |
| -7.644  | ENSG00000128059 | PPAT       | phosphoribosyl pyrophosphate amidotransferase                            | Cytoplasm           |
| -6.174  | ENSG00000086717 | PPEF1      | protein phosphatase with EF-hand domain 1                                | Extracellular Space |
| -5.608  | ENSG00000177380 | PPFIA3     | PTPRF interacting protein alpha 3                                        | Plasma Membrane     |
| -7.923  | ENSG00000143847 | PPFIA4     | PTPRF interacting protein alpha 4                                        | Plasma Membrane     |
| -6.267  | ENSG00000254463 | PPIAP41    | chondroitin sulfate proteoglycan 4 pseudogene 3 Y-linked                 | Other               |
| -1.955  | ENSG00000171497 | PPID       | peptidylprolyl isomerase D                                               | Cytoplasm           |
| -6.415  | ENSG00000243970 | PPIEL      | peptidylprolyl isomerase E like pseudogene                               | Nucleus             |
| -8.463  | ENSG00000171960 | PIPH       | peptidylprolyl isomerase H                                               | Nucleus             |
| -7.458  | ENSG00000168781 | PIIP5K1    | diphosphoinositol pentakisphosphate kinase 1                             | Nucleus             |
| -2.211  | ENSG00000145725 | PIIP5K2    | diphosphoinositol pentakisphosphate kinase 2                             | Cytoplasm           |
| -6.571  | ENSG00000164088 | PPM1M      | protein phosphatase, Mg2+/Mn2+ dependent 1M                              | Nucleus             |
| -6.932  | ENSG00000213889 | PPM1N      | protein phosphatase, Mg2+/Mn2+ dependent 1N (putative)                   | Extracellular Space |
| -8.461  | ENSG00000143224 | PPOX       | protoporphyrinogen oxidase                                               | Cytoplasm           |
| -1.563  | ENSG00000077157 | PPP1R12B   | protein phosphatase 1 regulatory subunit 12B                             | Cytoplasm           |
| -5.259  | ENSG00000179967 | PPP1R14BP3 | protein phosphatase 1 regulatory inhibitor subunit 14B pseudogene 3      | Other               |
| -11.276 | ENSG00000101445 | PPP1R16B   | protein phosphatase 1 regulatory subunit 16B                             | Plasma Membrane     |
| -4.209  | ENSG00000146112 | PPP1R18    | protein phosphatase 1 regulatory subunit 18                              | Other               |
| -7.199  | ENSG00000162148 | PPP1R32    | protein phosphatase 1 regulatory subunit 32                              | Other               |
| -5.092  | ENSG00000224986 | PPP1R8P1   | protein phosphatase 1 regulatory subunit 8 pseudogene 1                  | Other               |
| -2.221  | ENSG00000108819 | PPP1R9B    | protein phosphatase 1 regulatory subunit 9B                              | Cytoplasm           |
| -8.189  | ENSG00000156475 | PPP2R2B    | protein phosphatase 2 regulatory subunit Bbeta                           | Cytoplasm           |
| -10.333 | ENSG00000068971 | PPP2R5B    | protein phosphatase 2 regulatory subunit B'beta                          | Cytoplasm           |
| -2.614  | ENSG00000078304 | PPP2R5C    | protein phosphatase 2 regulatory subunit B'gamma                         | Nucleus             |
| -2.55   | ENSG00000119414 | PPP6C      | protein phosphatase 6 catalytic subunit                                  | Nucleus             |
| -5.882  | ENSG00000221988 | PPT2       | palmitoyl-protein thioesterase 2                                         | Cytoplasm           |
| -6.837  | ENSG00000243279 | PRAF2      | PRA1 domain family member 2                                              | Other               |
| -13.01  | ENSG00000133246 | PRAM1      | PML-RARA regulated adaptor molecule 1                                    | Other               |
| -6.327  | ENSG00000057657 | PRDM1      | PR/SET domain 1                                                          | Nucleus             |
| -9.089  | ENSG00000138738 | PRDM5      | PR/SET domain 5                                                          | Nucleus             |
| -8.224  | ENSG00000152784 | PRDM8      | PR/SET domain 8                                                          | Nucleus             |
| -14.787 | ENSG00000124126 | PREX1      | phosphatidylinositol-3,4,5-trisphosphate dependent Rac exchange factor 1 | Cytoplasm           |
| -13.37  | ENSG00000180644 | PRF1       | perforin 1                                                               | Cytoplasm           |
| -7.409  | ENSG00000139174 | PRICKLE1   | prickle planar cell polarity protein 1                                   | Nucleus             |
| -8.729  | ENSG00000012211 | PRICKLE3   | prickle planar cell polarity protein 3                                   | Other               |
| -8.149  | ENSG00000198056 | PRIM1      | DNA primase subunit 1                                                    | Nucleus             |
| -1.934  | ENSG00000072062 | PRKACA     | protein kinase cAMP-activated catalytic subunit alpha                    | Cytoplasm           |
| -6.844  | ENSG00000239911 | PRKAG2-AS1 | PRKAG2 antisense RNA 1                                                   | Other               |
| -9.185  | ENSG00000237943 | PRKCQ-AS1  | PRKCQ antisense RNA 1                                                    | Other               |
| -5.719  | ENSG00000182873 | PRKCZ-AS1  | PRKCZ antisense RNA 1                                                    | Other               |
| -5.602  | ENSG00000138669 | PRKG2      | protein kinase cGMP-dependent 2                                          | Cytoplasm           |
| -7.122  | ENSG00000223960 | PRKRA-AS1  | PRKRA antisense RNA 1                                                    | Other               |
| -11.44  | ENSG00000183943 | PRKX       | protein kinase X-linked                                                  | Cytoplasm           |
| -7.693  | ENSG00000167525 | PROCA1     | protein interacting with cyclin A1                                       | Cytoplasm           |
| -10.3   | ENSG00000163421 | PROK2      | prokineticin 2                                                           | Extracellular Space |
| -5.758  | ENSG00000162997 | PRORS1P    | prolyl-tRNA synthetase associated domain containing 1, pseudogene        | Other               |
| -8.593  | ENSG00000068489 | PRR11      | proline rich 11                                                          | Other               |
| -2.549  | ENSG00000126464 | PRR12      | proline rich 12                                                          | Extracellular Space |
| -4.233  | ENSG00000187534 | PRR13P5    | proline rich 13 pseudogene 5                                             | Other               |
| -5.924  | ENSG00000212123 | PRR22      | proline rich 22                                                          | Other               |
| -5.633  | ENSG00000224383 | PRR29      | proline rich 29                                                          | Other               |
| -8.794  | ENSG00000204576 | PRR3       | proline rich 3                                                           | Other               |
| -5.855  | ENSG00000182257 | PRR34      | PRR34 long non-coding RNA                                                | Other               |
| -7.694  | ENSG00000111215 | PRR4       | proline rich 4                                                           | Extracellular Space |
| -10.481 | ENSG00000135362 | PRR5L      | proline rich 5 like                                                      | Cytoplasm           |
| -8.604  | ENSG00000131188 | PRR7       | proline rich 7, synaptic                                                 | Plasma Membrane     |
| -8.333  | ENSG00000224940 | PRRT4      | proline rich transmembrane protein 4                                     | Other               |
| -5.118  | ENSG00000178226 | PRSS36     | serine protease 36                                                       | Extracellular Space |
| -5.602  | ENSG00000151006 | PRSS53     | serine protease 53                                                       | Other               |
| -5.592  | ENSG00000185198 | PRSS57     | serine protease 57                                                       | Extracellular Space |
| -9.447  | ENSG00000196415 | PRTN3      | proteinase 3                                                             | Extracellular Space |
| -6.748  | ENSG00000105227 | PRX        | periaxin                                                                 | Nucleus             |
| -9.114  | ENSG00000158122 | PRXL2C     | peroxiredoxin like 2C                                                    | Other               |
| -2.401  | ENSG00000197746 | PSAP       | prosaposin                                                               | Extracellular Space |
| -9.717  | ENSG00000159792 | PSKH1      | protein serine kinase H1                                                 | Nucleus             |
| -8.154  | ENSG00000129084 | PSMA1      | proteasome subunit alpha 1                                               | Cytoplasm           |
| -7.266  | ENSG00000110801 | PSMD9      | proteasome 26S subunit, non-ATPase 9                                     | Cytoplasm           |
| -8.441  | ENSG00000183527 | PSMG1      | proteasome assembly chaperone 1                                          | Plasma Membrane     |
| -7.776  | ENSG00000230487 | PSMG3-AS1  | PSMG3 antisense RNA 1 (head to head)                                     | Other               |
| -5.729  | ENSG00000125650 | PSPN       | persephin                                                                | Extracellular Space |
| -7.605  | ENSG00000179988 | PSTK       | phosphoserine-threonine kinase                                           | Cytoplasm           |
| -13.046 | ENSG00000140368 | PSTPIP1    | proline-serine-threonine phosphatase interacting protein 1               | Cytoplasm           |
| -10.617 | ENSG00000117569 | PTBP2      | polypyrimidine tract binding protein 2                                   | Nucleus             |
| -6.694  | ENSG00000106246 | PTCD1      | pentatricopeptide repeat domain 1                                        | Cytoplasm           |
| -3.667  | ENSG00000132300 | PTCD3      | pentatricopeptide repeat domain 3                                        | Cytoplasm           |
| -8.201  | ENSG00000174915 | PTDSS2     | phosphatidylserine synthase 2                                            | Cytoplasm           |
| -3.5    | ENSG00000237984 | PTENP1     | phosphatase and tensin homolog pseudogene 1                              | Cytoplasm           |
| -7.06   | ENSG00000183134 | PTGDR2     | prostaglandin D2 receptor 2                                              | Plasma Membrane     |
| -10.003 | ENSG00000107317 | PTGDS      | prostaglandin D2 synthase                                                | Cytoplasm           |
| -10.951 | ENSG00000125384 | PTGER2     | prostaglandin E receptor 2                                               | Plasma Membrane     |
| -3.592  | ENSG00000234518 | PTGES3P1   | prostaglandin E synthase 3 pseudogene 1                                  | Other               |
| -6.698  | ENSG00000122420 | PTGFR      | prostaglandin F receptor                                                 | Plasma Membrane     |
| -6.32   | ENSG00000144407 | PTH2R      | parathyroid hormone 2 receptor                                           | Plasma Membrane     |
| -1.963  | ENSG00000120899 | PTK2B      | protein tyrosine kinase 2 beta                                           | Cytoplasm           |
| -2.706  | ENSG00000231503 | PTMAP4     | prothymosin alpha pseudogene 4                                           | Other               |
| -5.838  | ENSG00000268006 | PTOV1-AS1  | PTOV1 antisense RNA 1                                                    | Other               |
| -6.719  | ENSG00000110536 | PTPMT1     | protein tyrosine phosphatase, mitochondrial 1                            | Cytoplasm           |

|         |                  |                         |                                                                  |                     |
|---------|------------------|-------------------------|------------------------------------------------------------------|---------------------|
| -11.528 | ENSG00000134242  | PTPN22                  | protein tyrosine phosphatase, non-receptor type 22               | Cytoplasm           |
| -4.519  | ENSG00000111679  | PTPN6                   | protein tyrosine phosphatase, non-receptor type 6                | Cytoplasm           |
| -7.627  | ENSG000000081237 | PTPRC                   | protein tyrosine phosphatase, receptor type C                    | Plasma Membrane     |
| -5.063  | ENSG00000213402  | PTPRCAP                 | protein tyrosine phosphatase, receptor type C associated protein | Plasma Membrane     |
| -7.443  | ENSG00000132334  | PTPRE                   | protein tyrosine phosphatase, receptor type E                    | Plasma Membrane     |
| -8.211  | ENSG00000151490  | PTPRO                   | protein tyrosine phosphatase, receptor type O                    | Plasma Membrane     |
| -6.486  | ENSG00000243323  | PTPRVP                  | protein tyrosine phosphatase, receptor type V, pseudogene        | Other               |
| -8.312  | ENSG00000141378  | PTRH2                   | peptidyl-tRNA hydrolase 2                                        | Cytoplasm           |
| -7.651  | ENSG00000164611  | PTTG1                   | pituitary tumor-transforming 1                                   | Nucleus             |
| -9.515  | ENSG00000163661  | PTX3                    | pentraxin 3                                                      | Extracellular Space |
| -8.4    | ENSG00000162927  | PUS10                   | pseudouridine synthase 10                                        | Other               |
| -3.664  | ENSG00000089159  | PXN                     | paxillin                                                         | Cytoplasm           |
| -11.733 | ENSG00000103490  | PYCARD                  | PYD and CARD domain containing                                   | Cytoplasm           |
| -6.624  | ENSG00000261359  | PYCARD-AS1              | PYCARD antisense RNA 1                                           | Other               |
| -6.836  | ENSG00000068976  | PYGM                    | glycogen phosphorylase, muscle associated                        | Cytoplasm           |
| -7.81   | ENSG000000011478 | QPCTL                   | glutaminy-peptide cyclotransferase like                          | Cytoplasm           |
| -8.936  | ENSG00000130348  | QRSL1                   | glutaminyl-tRNA amidotransferase subunit QRSL1                   | Cytoplasm           |
| -9.679  | ENSG00000104679  | R3HCC1                  | R3H domain and coiled-coil containing 1                          | Other               |
| -6.751  | ENSG00000169228  | RAB24                   | RAB24, member RAS oncogene family                                | Cytoplasm           |
| -12.999 | ENSG00000069974  | RAB27A                  | RAB27A, member RAS oncogene family                               | Cytoplasm           |
| -5.808  | ENSG00000134594  | RAB33A                  | RAB33A, member RAS oncogene family                               | Cytoplasm           |
| -8.919  | ENSG00000109113  | RAB34                   | RAB34, member RAS oncogene family                                | Cytoplasm           |
| -5.744  | ENSG00000100228  | RAB36                   | RAB36, member RAS oncogene family                                | Cytoplasm           |
| -6.604  | ENSG00000179331  | RAB39A                  | RAB39A, member RAS oncogene family                               | Cytoplasm           |
| -7.828  | ENSG00000155961  | RAB39B                  | RAB39B, member RAS oncogene family                               | Plasma Membrane     |
| -6.864  | ENSG00000105649  | RAB3A                   | RAB3A, member RAS oncogene family                                | Cytoplasm           |
| -8.173  | ENSG00000172780  | RAB43                   | RAB43, member RAS oncogene family                                | Cytoplasm           |
| -5.709  | ENSG00000259856  | RAB43P1                 | RAB43 pseudogene 1                                               | Other               |
| -10.184 | ENSG00000255587  | RAB44                   | RAB44, member RAS oncogene family                                | Cytoplasm           |
| -9.004  | ENSG00000167578  | RAB4B                   | RAB4B, member RAS oncogene family                                | Plasma Membrane     |
| -8.609  | ENSG00000136933  | RABEPK                  | Rab9 effector protein with kelch motifs                          | Cytoplasm           |
| -7.223  | ENSG00000144840  | RABL3                   | RAB, member of RAS oncogene family like 3                        | Other               |
| -5.012  | ENSG00000128340  | RAC2                    | Rac family small GTPase 2                                        | Cytoplasm           |
| -4.549  | ENSG00000070950  | RAD18                   | RAD18 E3 ubiquitin protein ligase                                | Nucleus             |
| -5.69   | ENSG00000253327  | RAD21-AS1               | RAD21 antisense RNA 1                                            | Other               |
| -8.188  | ENSG00000185379  | RAD51D                  | RAD51 paralog D                                                  | Nucleus             |
| -5.852  | ENSG00000085999  | RAD54L                  | RAD54 like                                                       | Nucleus             |
| -7.211  | ENSG00000147231  | RADX                    | RPA1 related single stranded DNA binding protein, X-linked       | Nucleus             |
| -10.694 | ENSG00000137040  | RANBP6                  | RAN binding protein 6                                            | Cytoplasm           |
| -6.602  | ENSG00000232160  | RAP2C-AS1               | RAP2C antisense RNA 1                                            | Other               |
| -2.282  | ENSG00000107263  | RAPGEF1                 | Rap guanine nucleotide exchange factor 1                         | Cytoplasm           |
| -6.507  | ENSG00000079337  | RAPGEF3                 | Rap guanine nucleotide exchange factor 3                         | Nucleus             |
| -9.174  | ENSG00000158987  | RAPGEF6                 | Rap guanine nucleotide exchange factor 6                         | Plasma Membrane     |
| -6.138  | ENSG00000265666  | RARA-AS1                | RARA antisense RNA 1                                             | Other               |
| -6.033  | ENSG00000250170  | RASA2-IT1               | RASA2 intronic transcript 1                                      | Other               |
| -7.695  | ENSG00000232487  | RASA3-IT1               | RASA3 intronic transcript 1                                      | Other               |
| -6.565  | ENSG00000105808  | RASA4                   | RAS p21 protein activator 4                                      | Cytoplasm           |
| -7.738  | ENSG00000228903  | RASA4CP                 | RAS p21 protein activator 4C, pseudogene                         | Other               |
| -12.269 | ENSG00000105122  | RASAL3                  | RAS protein activator like 3                                     | Cytoplasm           |
| -11.293 | ENSG00000172575  | RASGRP1                 | RAS guanyl releasing protein 1                                   | Cytoplasm           |
| -11.909 | ENSG00000171777  | RASGRP4                 | RAS guanyl releasing protein 4                                   | Cytoplasm           |
| -14.233 | ENSG00000101265  | RASSF2                  | Ras association domain family member 2                           | Nucleus             |
| -12.066 | ENSG00000107551  | RASSF4                  | Ras association domain family member 4                           | Other               |
| -3.442  | ENSG00000139687  | RB1                     | RB transcriptional corepressor 1                                 | Nucleus             |
| -6.553  | ENSG00000171174  | RBKS                    | ribokinase                                                       | Cytoplasm           |
| -6.499  | ENSG00000188739  | RBM34                   | RNA binding motif protein 34                                     | Nucleus             |
| -9.173  | ENSG00000184898  | RBM43                   | RNA binding motif protein 43                                     | Other               |
| -7.952  | ENSG00000177483  | RBM44                   | RNA binding motif protein 44                                     | Other               |
| -6.209  | ENSG00000076067  | RBM52                   | RNA binding motif single stranded interacting protein 2          | Nucleus             |
| -5.317  | ENSG00000233575  | RBMX2P3                 | RBMX2 pseudogene 3                                               | Other               |
| -7.4    | ENSG00000236535  | RC3H1-IT1               | RC3H1 intronic transcript 1                                      | Other               |
| -6.394  | ENSG00000214455  | RCN1P2                  | reticulocalbin 1 pseudogene 2                                    | Other               |
| -9.206  | ENSG00000142552  | RCN3                    | reticulocalbin 3                                                 | Cytoplasm           |
| -13.739 | ENSG00000198771  | RCS1                    | RCS1 domain containing 1                                         | Other               |
| -5.192  | ENSG00000109047  | RCVRN                   | recoverin                                                        | Cytoplasm           |
| -6.203  | ENSG00000135437  | RDH5                    | retinol dehydrogenase 5                                          | Cytoplasm           |
| -4.785  | ENSG00000168476  | REEP4                   | receptor accessory protein 4                                     | Cytoplasm           |
| -4.046  | ENSG00000162924  | REL                     | REL proto-oncogene, NF-kB subunit                                | Nucleus             |
| -12.31  | ENSG00000054967  | RELT                    | RELT TNF receptor                                                | Plasma Membrane     |
| -6.903  | ENSG00000139890  | REM2                    | RRAD and GEM like GTPase 2                                       | Plasma Membrane     |
| -5.843  | ENSG00000232921  | RERE-AS1                | RERE antisense RNA 1                                             | Other               |
| -2.47   | ENSG00000174718  | REF1                    | retroelement silencing factor 1                                  | Nucleus             |
| -11.988 | ENSG00000104918  | RETN                    | resistin                                                         | Extracellular Space |
| -9.36   | ENSG00000006015  | REX1BD                  | required for excision 1-B domain containing                      | Other               |
| -8.904  | ENSG00000135002  | RFK                     | riboflavin kinase                                                | Cytoplasm           |
| -6.171  | ENSG00000225465  | RFPL1S                  | RFPL1 antisense RNA 1                                            | Other               |
| -6.706  | ENSG00000232104  | RFX3-AS1                | RFX3 antisense RNA 1                                             | Other               |
| -8.074  | ENSG00000143344  | RGL1                    | ral guanine nucleotide dissociation stimulator like 1            | Cytoplasm           |
| -10.299 | ENSG00000159496  | RGL4                    | ral guanine nucleotide dissociation stimulator like 4            | Other               |
| -5.94   | ENSG00000182175  | RGMA                    | repulsive guidance molecule BMP co-receptor a                    | Plasma Membrane     |
| -7.328  | ENSG00000174136  | RGMB                    | repulsive guidance molecule BMP co-receptor b                    | Plasma Membrane     |
| -5.87   | ENSG00000169629  | RGPD4 (includes others) | RANBP2-like and GRIP domain containing 5                         | Nucleus             |
| -8.613  | ENSG00000090104  | RGS1                    | regulator of G protein signaling 1                               | Plasma Membrane     |
| -11.235 | ENSG00000169220  | RGS14                   | regulator of G protein signaling 14                              | Cytoplasm           |
| -5.919  | ENSG00000229473  | RGS17P1                 | regulator of G protein signaling 17 pseudogene 1                 | Other               |
| -12.344 | ENSG00000171700  | RGS19                   | regulator of G protein signaling 19                              | Cytoplasm           |
| -8.368  | ENSG00000188672  | RHCE/RHD                | Rh blood group D antigen                                         | Plasma Membrane     |
| -6.104  | ENSG00000235908  | RHOA-IT1                | chondroitin sulfate proteoglycan 4 pseudogene 3 Y-linked         | Other               |
| -9.075  | ENSG00000168421  | RHOH                    | ras homolog family member H                                      | Plasma Membrane     |
| -8.973  | ENSG00000174791  | RIN1                    | Ras and Rab interactor 1                                         | Cytoplasm           |
| -13.443 | ENSG00000100599  | RIN3                    | Ras and Rab interactor 3                                         | Cytoplasm           |

|         |                 |               |                                                            |                     |
|---------|-----------------|---------------|------------------------------------------------------------|---------------------|
| -9.851  | ENSG00000129465 | RIPK3         | receptor interacting serine/threonine kinase 3             | Plasma Membrane     |
| -6.786  | ENSG00000039523 | RIPOR1        | RHO family interacting cell polarization regulator 1       | Cytoplasm           |
| -1.918  | ENSG00000111913 | RIPOR2        | RHO family interacting cell polarization regulator 2       | Cytoplasm           |
| -8.179  | ENSG00000155906 | RMND1         | required for meiotic nuclear division 1 homolog            | Cytoplasm           |
| -6.05   | ENSG00000200830 | RN75KP134     | chondroitin sulfate proteoglycan 4 pseudogene 3 Y-linked   | Other               |
| -6.128  | ENSG00000222162 | RN75KP151     | RNA, 75K small nuclear pseudogene 151                      | Other               |
| -6.076  | ENSG00000222112 | RN75KP16      | RNA, 75K small nuclear pseudogene 16                       | Other               |
| -4.322  | ENSG00000260682 | RN75KP176     | RNA, 75K small nuclear pseudogene 176                      | Other               |
| -6.126  | ENSG00000252233 | RN75KP253     | RNA, 75K small nuclear pseudogene 253                      | Other               |
| -5.53   | ENSG00000201581 | RN75KP78      | RNA, 75K small nuclear pseudogene 78                       | Other               |
| -6.452  | ENSG00000243398 | RN75L141P     | chondroitin sulfate proteoglycan 4 pseudogene 3 Y-linked   | Other               |
| -4.134  | ENSG00000265123 | RN75L200P     | RNA, 75L, cytoplasmic 200, pseudogene                      | Other               |
| -5.716  | ENSG00000242999 | RN75L239P     | RNA, 75L, cytoplasmic 239, pseudogene                      | Other               |
| -5.523  | ENSG00000265093 | RN75L246P     | RNA, 75L, cytoplasmic 246, pseudogene                      | Other               |
| -7.797  | ENSG00000240767 | RN75L288P     | chondroitin sulfate proteoglycan 4 pseudogene 3 Y-linked   | Other               |
| -7.702  | ENSG00000240853 | RN75L328P     | RNA, 75L, cytoplasmic 328, pseudogene                      | Other               |
| -4.865  | ENSG00000243911 | RN75L430P     | RNA, 75L, cytoplasmic 430, pseudogene                      | Other               |
| -7.841  | ENSG00000264384 | RN75L431P     | RNA, 75L, cytoplasmic 431, pseudogene                      | Other               |
| -6.068  | ENSG00000241868 | RN75L434P     | RNA, 75L, cytoplasmic 434, pseudogene                      | Other               |
| -4.598  | ENSG00000240322 | RN75L481P     | RNA, 75L, cytoplasmic 481, pseudogene                      | Other               |
| -3.807  | ENSG00000265802 | RN75L49P      | chondroitin sulfate proteoglycan 4 pseudogene 3 Y-linked   | Other               |
| -7.29   | ENSG00000241939 | RN75L517P     | RNA, 75L, cytoplasmic 517, pseudogene                      | Other               |
| -5.126  | ENSG00000240750 | RN75L559P     | chondroitin sulfate proteoglycan 4 pseudogene 3 Y-linked   | Other               |
| -5.439  | ENSG00000240233 | RN75L587P     | RNA, 75L, cytoplasmic 587, pseudogene                      | Other               |
| -5.896  | ENSG00000265727 | RN75L648P     | chondroitin sulfate proteoglycan 4 pseudogene 3 Y-linked   | Other               |
| -5.559  | ENSG00000240966 | RN75L681P     | RNA, 75L, cytoplasmic 681, pseudogene                      | Other               |
| -5.641  | ENSG00000242330 | RN75L683P     | RNA, 75L, cytoplasmic 683, pseudogene                      | Other               |
| -6.142  | ENSG00000243954 | RN75L743P     | RNA, 75L, cytoplasmic 743, pseudogene                      | Other               |
| -5.335  | ENSG00000242853 | RN75L749P     | chondroitin sulfate proteoglycan 4 pseudogene 3 Y-linked   | Other               |
| -5.927  | ENSG00000241230 | RN75L801P     | RNA, 75L, cytoplasmic 801, pseudogene                      | Other               |
| -8.835  | ENSG00000243650 | RN75L834P     | RNA, 75L, cytoplasmic 834, pseudogene                      | Other               |
| -3.216  | ENSG00000251705 | RNA5-8SP6     | RNA, 5.8S ribosomal pseudogene 6                           | Other               |
| -4.995  | ENSG00000223086 | RNA5SP155     | RNA, 5S ribosomal pseudogene 155                           | Other               |
| -5.881  | ENSG00000202474 | RNA5SP283     | RNA, 5S ribosomal pseudogene 283                           | Other               |
| -5.91   | ENSG00000199733 | RNA5SP307     | RNA, 5S ribosomal pseudogene 307                           | Other               |
| -11.809 | ENSG00000169385 | RNASE2        | ribonuclease A family member 2                             | Cytoplasm           |
| -9.589  | ENSG00000169397 | RNASE3        | ribonuclease A family member 3                             | Extracellular Space |
| -10.922 | ENSG00000169413 | RNASE6        | ribonuclease A family member k6                            | Extracellular Space |
| -6.53   | ENSG00000234171 | RNASEH1-AS1   | RNASEH1 antisense RNA 1                                    | Other               |
| -7.499  | ENSG00000104889 | RNASEH2A      | ribonuclease H2 subunit A                                  | Nucleus             |
| -10.166 | ENSG00000172922 | RNASEH2C      | ribonuclease H2 subunit C                                  | Nucleus             |
| -7.522  | ENSG00000219200 | RNASEK        | ribonuclease K                                             | Other               |
| -8.708  | ENSG00000137522 | RNF121        | ring finger protein 121                                    | Other               |
| -7.753  | ENSG00000133874 | RNF122        | ring finger protein 122                                    | Cytoplasm           |
| -10.892 | ENSG00000101695 | RNF125        | ring finger protein 125                                    | Cytoplasm           |
| -10.581 | ENSG00000181481 | RNF135        | ring finger protein 135                                    | Cytoplasm           |
| -3.298  | ENSG00000163162 | RNF149        | ring finger protein 149                                    | Cytoplasm           |
| -7.791  | ENSG00000141622 | RNF165        | ring finger protein 165                                    | Nucleus             |
| -12.784 | ENSG00000158717 | RNF166        | ring finger protein 166                                    | Other               |
| -8.492  | ENSG00000120925 | RNF170        | ring finger protein 170                                    | Other               |
| -6.873  | ENSG00000145428 | RNF175        | ring finger protein 175                                    | Other               |
| -9.086  | ENSG00000180537 | RNF182        | ring finger protein 182                                    | Cytoplasm           |
| -6.644  | ENSG00000212864 | RNF208        | ring finger protein 208                                    | Other               |
| -2.106  | ENSG00000173821 | RNF213        | ring finger protein 213                                    | Cytoplasm           |
| -5.889  | ENSG00000237738 | RNF216-IT1    | RNF216 intronic transcript 1                               | Other               |
| -1.733  | ENSG00000187147 | RNF220        | ring finger protein 220                                    | Cytoplasm           |
| -6.279  | ENSG00000179859 | RNF227        | ring finger protein 227                                    | Other               |
| -8.96   | ENSG00000189050 | RNF71         | ring finger protein, transmembrane 1                       | Cytoplasm           |
| -6.56   | ENSG00000135119 | RNF72         | ring finger protein, transmembrane 2                       | Other               |
| -6.23   | ENSG00000184719 | RNLS          | renalase, FAD dependent amine oxidase                      | Extracellular Space |
| -5.647  | ENSG00000250896 | RNPS1P1       | RNA binding protein with serine rich domain 1 pseudogene 1 | Other               |
| -5.804  | ENSG00000202347 | RNU1-16P      | RNA, U1 small nuclear 16, pseudogene                       | Other               |
| -5.355  | ENSG00000201221 | RNU4-40P      | RNA, U4 small nuclear 40, pseudogene                       | Other               |
| -5.398  | ENSG00000201076 | RNU4-51P      | RNA, U4 small nuclear 51, pseudogene                       | Other               |
| -3.764  | ENSG00000200169 | RNU5D-1       | RNA, USD small nuclear 1                                   | Other               |
| -7.593  | ENSG00000199377 | RNU5F-1       | RNA, U5F small nuclear 1                                   | Other               |
| -7.765  | ENSG00000252498 | RNU6-1016P    | chondroitin sulfate proteoglycan 4 pseudogene 3 Y-linked   | Other               |
| -4.534  | ENSG00000251739 | RNU6-1053P    | RNA, U6 small nuclear 1053, pseudogene                     | Other               |
| -4.978  | ENSG00000252361 | RNU6-118P     | RNA, U6 small nuclear 118, pseudogene                      | Other               |
| -6.235  | ENSG00000207234 | RNU6-125P     | RNA, U6 small nuclear 125, pseudogene                      | Other               |
| -6.424  | ENSG00000200571 | RNU6-1284P    | chondroitin sulfate proteoglycan 4 pseudogene 3 Y-linked   | Other               |
| -6.31   | ENSG00000200648 | RNU6-226P     | chondroitin sulfate proteoglycan 4 pseudogene 3 Y-linked   | Other               |
| -5.291  | ENSG00000200183 | RNU6-238P     | RNA, U6 small nuclear 238, pseudogene                      | Other               |
| -5.693  | ENSG00000201770 | RNU6-384P     | chondroitin sulfate proteoglycan 4 pseudogene 3 Y-linked   | Other               |
| -6.137  | ENSG00000212526 | RNU6-466P     | chondroitin sulfate proteoglycan 4 pseudogene 3 Y-linked   | Other               |
| -5.841  | ENSG00000201367 | RNU6-522P     | RNA, U6 small nuclear 522, pseudogene                      | Other               |
| -6.65   | ENSG00000252391 | RNU6-638P     | RNA, U6 small nuclear 638, pseudogene                      | Other               |
| -6.271  | ENSG00000207308 | RNU6-878P     | chondroitin sulfate proteoglycan 4 pseudogene 3 Y-linked   | Other               |
| -6.357  | ENSG00000207227 | RNU6-900P     | chondroitin sulfate proteoglycan 4 pseudogene 3 Y-linked   | Other               |
| -5.648  | ENSG00000252103 | RNU6-917P     | RNA, U6 small nuclear 917, pseudogene                      | Other               |
| -5.546  | ENSG00000199872 | RNU6-942P     | RNA, U6 small nuclear 942, pseudogene                      | Other               |
| -7.324  | ENSG00000252620 | RNU6ATAC24P   | chondroitin sulfate proteoglycan 4 pseudogene 3 Y-linked   | Other               |
| -6.772  | ENSG00000253043 | RNU7-181P     | chondroitin sulfate proteoglycan 4 pseudogene 3 Y-linked   | Other               |
| -6.153  | ENSG00000239151 | RNU7-195P     | chondroitin sulfate proteoglycan 4 pseudogene 3 Y-linked   | Other               |
| -5.532  | ENSG00000238959 | RNU7-19P      | RNA, U7 small nuclear 19 pseudogene                        | Other               |
| -5.346  | ENSG00000252206 | RNU7-40P      | RNA, U7 small nuclear 40 pseudogene                        | Other               |
| -7.279  | ENSG00000154134 | ROBO3         | roundabout guidance receptor 3                             | Plasma Membrane     |
| -6.939  | ENSG00000145491 | ROPN1L        | rhopilin associated tail protein 1 like                    | Cytoplasm           |
| -6.044  | ENSG00000069667 | RORA          | RAR related orphan receptor A                              | Nucleus             |
| -6.337  | ENSG00000245534 | RORA-AS1      | RORA antisense RNA 1                                       | Other               |
| -7.948  | ENSG00000258461 | RP11-164J13.1 | chondroitin sulfate proteoglycan 4 pseudogene 3 Y-linked   | Other               |

|         |                 |               |                                                          |       |
|---------|-----------------|---------------|----------------------------------------------------------|-------|
| -9.246  | ENSG00000214331 | RP11_252A24.2 | chondroitin sulfate proteoglycan 4 pseudogene 3 Y-linked | Other |
| -8.869  | ENSG00000225471 | RP11_262D11.2 | chondroitin sulfate proteoglycan 4 pseudogene 3 Y-linked | Other |
| -5.845  | ENSG00000270127 | RP11_526I2.5  | chondroitin sulfate proteoglycan 4 pseudogene 3 Y-linked | Other |
| -7.502  | ENSG00000213443 | RP11_75L1.2   | chondroitin sulfate proteoglycan 4 pseudogene 3 Y-linked | Other |
| -7.151  | ENSG00000260534 | RP11_1006G144 | chondroitin sulfate proteoglycan 4 pseudogene 3 Y-linked | Other |
| -4.582  | ENSG00000272444 | RP11_1017G216 | chondroitin sulfate proteoglycan 4 pseudogene 3 Y-linked | Other |
| -8.192  | ENSG00000261468 | RP11_1024P171 | chondroitin sulfate proteoglycan 4 pseudogene 3 Y-linked | Other |
| -6.367  | ENSG00000259326 | RP11_102L122  | chondroitin sulfate proteoglycan 4 pseudogene 3 Y-linked | Other |
| -6.034  | ENSG00000240695 | RP11_102M111  | chondroitin sulfate proteoglycan 4 pseudogene 3 Y-linked | Other |
| -7.624  | ENSG00000233411 | RP11_104L212  | chondroitin sulfate proteoglycan 4 pseudogene 3 Y-linked | Other |
| -5.348  | ENSG00000225300 | RP11_1086F111 | chondroitin sulfate proteoglycan 4 pseudogene 3 Y-linked | Other |
| -7.913  | ENSG00000267074 | RP11_1094M145 | chondroitin sulfate proteoglycan 4 pseudogene 3 Y-linked | Other |
| -6.59   | ENSG00000267312 | RP11_1094M147 | chondroitin sulfate proteoglycan 4 pseudogene 3 Y-linked | Other |
| -5.846  | ENSG00000253475 | RP11_110G212  | chondroitin sulfate proteoglycan 4 pseudogene 3 Y-linked | Other |
| -5.794  | ENSG00000255121 | RP11_110I112  | chondroitin sulfate proteoglycan 4 pseudogene 3 Y-linked | Other |
| -6.066  | ENSG00000232611 | RP11_1114A54  | chondroitin sulfate proteoglycan 4 pseudogene 3 Y-linked | Other |
| -5.912  | ENSG00000255135 | RP11_111M223  | chondroitin sulfate proteoglycan 4 pseudogene 3 Y-linked | Other |
| -6.317  | ENSG00000227388 | RP11_112J316  | chondroitin sulfate proteoglycan 4 pseudogene 3 Y-linked | Other |
| -10.118 | ENSG00000257764 | RP11_1143G94  | chondroitin sulfate proteoglycan 4 pseudogene 3 Y-linked | Other |
| -6.116  | ENSG00000230138 | RP11_117D222  | chondroitin sulfate proteoglycan 4 pseudogene 3 Y-linked | Other |
| -7.153  | ENSG00000257169 | RP11_117N22   | chondroitin sulfate proteoglycan 4 pseudogene 3 Y-linked | Other |
| -6.063  | ENSG00000272927 | RP11_119I125  | chondroitin sulfate proteoglycan 4 pseudogene 3 Y-linked | Other |
| -8.38   | ENSG00000272908 | RP11_121A81   | chondroitin sulfate proteoglycan 4 pseudogene 3 Y-linked | Other |
| -7.596  | ENSG00000259959 | RP11_121C22   | chondroitin sulfate proteoglycan 4 pseudogene 3 Y-linked | Other |
| -9.706  | ENSG00000234961 | RP11_124N143  | chondroitin sulfate proteoglycan 4 pseudogene 3 Y-linked | Other |
| -8.485  | ENSG00000258539 | RP11_12J103   | chondroitin sulfate proteoglycan 4 pseudogene 3 Y-linked | Other |
| -7.515  | ENSG00000179978 | RP11_1319K71  | chondroitin sulfate proteoglycan 4 pseudogene 3 Y-linked | Other |
| -5.447  | ENSG00000224536 | RP11_134G87   | chondroitin sulfate proteoglycan 4 pseudogene 3 Y-linked | Other |
| -8.894  | ENSG00000265401 | RP11_138I14   | chondroitin sulfate proteoglycan 4 pseudogene 3 Y-linked | Other |
| -7.389  | ENSG00000241170 | RP11_147I31   | chondroitin sulfate proteoglycan 4 pseudogene 3 Y-linked | Other |
| -6.989  | ENSG00000267731 | RP11_147L138  | chondroitin sulfate proteoglycan 4 pseudogene 3 Y-linked | Other |
| -5.556  | ENSG00000244151 | RP11_148K112  | chondroitin sulfate proteoglycan 4 pseudogene 3 Y-linked | Other |
| -5.915  | ENSG00000272477 | RP11_158G181  | chondroitin sulfate proteoglycan 4 pseudogene 3 Y-linked | Other |
| -9.671  | ENSG00000264112 | RP11_159D122  | chondroitin sulfate proteoglycan 4 pseudogene 3 Y-linked | Other |
| -5.369  | ENSG00000260723 | RP11_165M12   | chondroitin sulfate proteoglycan 4 pseudogene 3 Y-linked | Other |
| -6.128  | ENSG00000261560 | RP11_166B23   | chondroitin sulfate proteoglycan 4 pseudogene 3 Y-linked | Other |
| -5.089  | ENSG00000273448 | RP11_166O46   | chondroitin sulfate proteoglycan 4 pseudogene 3 Y-linked | Other |
| -7.218  | ENSG00000255847 | RP11_167N42   | chondroitin sulfate proteoglycan 4 pseudogene 3 Y-linked | Other |
| -6.365  | ENSG00000239557 | RP11_168J186  | chondroitin sulfate proteoglycan 4 pseudogene 3 Y-linked | Other |
| -6.526  | ENSG00000261542 | RP11_16E183   | chondroitin sulfate proteoglycan 4 pseudogene 3 Y-linked | Other |
| -6.143  | ENSG00000261544 | RP11_16E233   | chondroitin sulfate proteoglycan 4 pseudogene 3 Y-linked | Other |
| -6.101  | ENSG00000261428 | RP11_16P61    | chondroitin sulfate proteoglycan 4 pseudogene 3 Y-linked | Other |
| -7.623  | ENSG00000270574 | RP11_171I22   | chondroitin sulfate proteoglycan 4 pseudogene 3 Y-linked | Other |
| -7.015  | ENSG00000271011 | RP11_171J25   | chondroitin sulfate proteoglycan 4 pseudogene 3 Y-linked | Other |
| -6.577  | ENSG00000266900 | RP11_173A162  | chondroitin sulfate proteoglycan 4 pseudogene 3 Y-linked | Other |
| -6.055  | ENSG00000257489 | RP11_175P133  | chondroitin sulfate proteoglycan 4 pseudogene 3 Y-linked | Other |
| -7.624  | ENSG00000258472 | RP11_192H234  | chondroitin sulfate proteoglycan 4 pseudogene 3 Y-linked | Other |
| -5.595  | ENSG00000264044 | RP11_192H237  | chondroitin sulfate proteoglycan 4 pseudogene 3 Y-linked | Other |
| -5.113  | ENSG00000260911 | RP11_196G112  | chondroitin sulfate proteoglycan 4 pseudogene 3 Y-linked | Other |
| -6.806  | ENSG00000262766 | RP11_196G114  | chondroitin sulfate proteoglycan 4 pseudogene 3 Y-linked | Other |
| -7.367  | ENSG00000266126 | RP11_209D144  | chondroitin sulfate proteoglycan 4 pseudogene 3 Y-linked | Other |
| -8.158  | ENSG00000261997 | RP11_212I214  | chondroitin sulfate proteoglycan 4 pseudogene 3 Y-linked | Other |
| -5.412  | ENSG00000269938 | RP11_214K320  | chondroitin sulfate proteoglycan 4 pseudogene 3 Y-linked | Other |
| -6.571  | ENSG00000266378 | RP11_214O13   | chondroitin sulfate proteoglycan 4 pseudogene 3 Y-linked | Other |
| -5.884  | ENSG00000248559 | RP11_215P83   | chondroitin sulfate proteoglycan 4 pseudogene 3 Y-linked | Other |
| -6.424  | ENSG00000273066 | RP11_216L1319 | chondroitin sulfate proteoglycan 4 pseudogene 3 Y-linked | Other |
| -6.875  | ENSG00000111788 | RP11_22B231   | chondroitin sulfate proteoglycan 4 pseudogene 3 Y-linked | Other |
| -4.52   | ENSG00000248773 | RP11_231L113  | chondroitin sulfate proteoglycan 4 pseudogene 3 Y-linked | Other |
| -5.613  | ENSG00000227034 | RP11_234N171  | chondroitin sulfate proteoglycan 4 pseudogene 3 Y-linked | Other |
| -6.335  | ENSG00000262248 | RP11_235E175  | chondroitin sulfate proteoglycan 4 pseudogene 3 Y-linked | Other |
| -6.68   | ENSG00000258352 | RP11_23J181   | chondroitin sulfate proteoglycan 4 pseudogene 3 Y-linked | Other |
| -8.624  | ENSG00000174171 | RP11_23P136   | chondroitin sulfate proteoglycan 4 pseudogene 3 Y-linked | Other |
| -5.91   | ENSG00000271843 | RP11_245J95   | chondroitin sulfate proteoglycan 4 pseudogene 3 Y-linked | Other |
| -6.643  | ENSG00000270062 | RP11_248J183  | chondroitin sulfate proteoglycan 4 pseudogene 3 Y-linked | Other |
| -6.021  | ENSG00000229721 | RP11_252I141  | chondroitin sulfate proteoglycan 4 pseudogene 3 Y-linked | Other |
| -6.01   | ENSG00000272711 | RP11_259N191  | chondroitin sulfate proteoglycan 4 pseudogene 3 Y-linked | Other |
| -7.058  | ENSG00000272807 | RP11_260M21   | chondroitin sulfate proteoglycan 4 pseudogene 3 Y-linked | Other |
| -5.807  | ENSG00000254419 | RP11_261P94   | chondroitin sulfate proteoglycan 4 pseudogene 3 Y-linked | Other |
| -6.47   | ENSG00000239280 | RP11_271C243  | chondroitin sulfate proteoglycan 4 pseudogene 3 Y-linked | Other |
| -8.72   | ENSG00000243679 | RP11_274B213  | chondroitin sulfate proteoglycan 4 pseudogene 3 Y-linked | Other |
| -9.762  | ENSG00000230715 | RP11_274B214  | chondroitin sulfate proteoglycan 4 pseudogene 3 Y-linked | Other |
| -7.085  | ENSG00000260671 | RP11_278A232  | chondroitin sulfate proteoglycan 4 pseudogene 3 Y-linked | Other |
| -7.644  | ENSG00000242861 | RP11_285F72   | chondroitin sulfate proteoglycan 4 pseudogene 3 Y-linked | Other |
| -4.3    | ENSG00000223612 | RP11_289I102  | chondroitin sulfate proteoglycan 4 pseudogene 3 Y-linked | Other |
| -8.742  | ENSG00000273149 | RP11_290D26   | chondroitin sulfate proteoglycan 4 pseudogene 3 Y-linked | Other |
| -6.417  | ENSG00000267940 | RP11_290F246  | chondroitin sulfate proteoglycan 4 pseudogene 3 Y-linked | Other |
| -5.791  | ENSG00000231615 | RP11_296O142  | chondroitin sulfate proteoglycan 4 pseudogene 3 Y-linked | Other |
| -7.962  | ENSG00000269929 | RP11_2B62     | chondroitin sulfate proteoglycan 4 pseudogene 3 Y-linked | Other |
| -6.348  | ENSG00000262837 | RP11_304F157  | chondroitin sulfate proteoglycan 4 pseudogene 3 Y-linked | Other |
| -5.849  | ENSG00000268659 | RP11_310J243  | chondroitin sulfate proteoglycan 4 pseudogene 3 Y-linked | Other |
| -5.726  | ENSG00000227740 | RP11_318C242  | chondroitin sulfate proteoglycan 4 pseudogene 3 Y-linked | Other |
| -8.695  | ENSG00000254325 | RP11_318K152  | chondroitin sulfate proteoglycan 4 pseudogene 3 Y-linked | Other |
| -5.565  | ENSG00000254783 | RP11_320L112  | chondroitin sulfate proteoglycan 4 pseudogene 3 Y-linked | Other |
| -7.346  | ENSG00000237513 | RP11_325F222  | chondroitin sulfate proteoglycan 4 pseudogene 3 Y-linked | Other |
| -7.459  | ENSG00000261270 | RP11_325K43   | chondroitin sulfate proteoglycan 4 pseudogene 3 Y-linked | Other |
| -7.338  | ENSG00000251661 | RP11_326C311  | chondroitin sulfate proteoglycan 4 pseudogene 3 Y-linked | Other |
| -5.908  | ENSG00000255328 | RP11_326C312  | chondroitin sulfate proteoglycan 4 pseudogene 3 Y-linked | Other |
| -8.65   | ENSG00000255026 | RP11_326C32   | chondroitin sulfate proteoglycan 4 pseudogene 3 Y-linked | Other |
| -5.73   | ENSG00000272755 | RP11_326G211  | chondroitin sulfate proteoglycan 4 pseudogene 3 Y-linked | Other |
| -7.742  | ENSG00000271646 | RP11_326I113  | chondroitin sulfate proteoglycan 4 pseudogene 3 Y-linked | Other |
| -5.989  | ENSG00000270426 | RP11_326I115  | chondroitin sulfate proteoglycan 4 pseudogene 3 Y-linked | Other |

|        |                 |               |                                                          |       |
|--------|-----------------|---------------|----------------------------------------------------------|-------|
| -6.703 | ENSG00000261644 | RP11_327F222  | chondroitin sulfate proteoglycan 4 pseudogene 3 Y-linked | Other |
| -7.397 | ENSG00000270120 | RP11_327F226  | chondroitin sulfate proteoglycan 4 pseudogene 3 Y-linked | Other |
| -4.996 | ENSG00000231856 | RP11_327P25   | chondroitin sulfate proteoglycan 4 pseudogene 3 Y-linked | Other |
| -7.651 | ENSG00000203644 | RP11_332M21   | chondroitin sulfate proteoglycan 4 pseudogene 3 Y-linked | Other |
| -5.865 | ENSG00000259984 | RP11_335G207  | chondroitin sulfate proteoglycan 4 pseudogene 3 Y-linked | Other |
| -5.779 | ENSG00000232466 | RP11_337A235  | chondroitin sulfate proteoglycan 4 pseudogene 3 Y-linked | Other |
| -7.498 | ENSG00000237188 | RP11_337C188  | chondroitin sulfate proteoglycan 4 pseudogene 3 Y-linked | Other |
| -4.945 | ENSG00000272644 | RP11_330A1    | chondroitin sulfate proteoglycan 4 pseudogene 3 Y-linked | Other |
| -7.066 | ENSG00000270696 | RP11_342K61   | chondroitin sulfate proteoglycan 4 pseudogene 3 Y-linked | Other |
| -4.94  | ENSG00000271452 | RP11_342K62   | chondroitin sulfate proteoglycan 4 pseudogene 3 Y-linked | Other |
| -7.222 | ENSG00000271862 | RP11_343L52   | chondroitin sulfate proteoglycan 4 pseudogene 3 Y-linked | Other |
| -5.413 | ENSG00000271009 | RP11_346C203  | chondroitin sulfate proteoglycan 4 pseudogene 3 Y-linked | Other |
| -5.028 | ENSG00000259232 | RP11_349G131  | chondroitin sulfate proteoglycan 4 pseudogene 3 Y-linked | Other |
| -6.912 | ENSG00000230928 | RP11_34A143   | chondroitin sulfate proteoglycan 4 pseudogene 3 Y-linked | Other |
| -7.078 | ENSG00000239906 | RP11_34P1314  | chondroitin sulfate proteoglycan 4 pseudogene 3 Y-linked | Other |
| -6.262 | ENSG00000258632 | RP11_354B31   | chondroitin sulfate proteoglycan 4 pseudogene 3 Y-linked | Other |
| -7.575 | ENSG00000270820 | RP11_355B12   | chondroitin sulfate proteoglycan 4 pseudogene 3 Y-linked | Other |
| -6.374 | ENSG00000226822 | RP11_356N12   | chondroitin sulfate proteoglycan 4 pseudogene 3 Y-linked | Other |
| -6.659 | ENSG00000256973 | RP11_359J142  | chondroitin sulfate proteoglycan 4 pseudogene 3 Y-linked | Other |
| -5.505 | ENSG00000272574 | RP11_359K184  | chondroitin sulfate proteoglycan 4 pseudogene 3 Y-linked | Other |
| -5.834 | ENSG00000260144 | RP11_361M103  | chondroitin sulfate proteoglycan 4 pseudogene 3 Y-linked | Other |
| -6.801 | ENSG00000250189 | RP11_362F192  | chondroitin sulfate proteoglycan 4 pseudogene 3 Y-linked | Other |
| -7.254 | ENSG00000272632 | RP11_362F193  | chondroitin sulfate proteoglycan 4 pseudogene 3 Y-linked | Other |
| -6.705 | ENSG00000228280 | RP11_367B62   | chondroitin sulfate proteoglycan 4 pseudogene 3 Y-linked | Other |
| -6.879 | ENSG00000269514 | RP11_370I1012 | chondroitin sulfate proteoglycan 4 pseudogene 3 Y-linked | Other |
| -5.773 | ENSG00000272267 | RP11_375N152  | chondroitin sulfate proteoglycan 4 pseudogene 3 Y-linked | Other |
| -8.266 | ENSG00000261338 | RP11_378A131  | chondroitin sulfate proteoglycan 4 pseudogene 3 Y-linked | Other |
| -6.442 | ENSG00000272750 | RP11_378J188  | chondroitin sulfate proteoglycan 4 pseudogene 3 Y-linked | Other |
| -5.863 | ENSG00000268220 | RP11_379K1712 | chondroitin sulfate proteoglycan 4 pseudogene 3 Y-linked | Other |
| -7.941 | ENSG00000224745 | RP11_380G52   | chondroitin sulfate proteoglycan 4 pseudogene 3 Y-linked | Other |
| -6.402 | ENSG00000250159 | RP11_381K202  | chondroitin sulfate proteoglycan 4 pseudogene 3 Y-linked | Other |
| -5.543 | ENSG00000254272 | RP11_382J242  | chondroitin sulfate proteoglycan 4 pseudogene 3 Y-linked | Other |
| -6.536 | ENSG00000230063 | RP11_384C46   | chondroitin sulfate proteoglycan 4 pseudogene 3 Y-linked | Other |
| -6.047 | ENSG00000258017 | RP11_386G1110 | chondroitin sulfate proteoglycan 4 pseudogene 3 Y-linked | Other |
| -7.489 | ENSG00000260060 | RP11_388M201  | chondroitin sulfate proteoglycan 4 pseudogene 3 Y-linked | Other |
| -6.83  | ENSG00000272686 | RP11_390E236  | chondroitin sulfate proteoglycan 4 pseudogene 3 Y-linked | Other |
| -6.545 | ENSG00000270060 | RP11_390K56   | chondroitin sulfate proteoglycan 4 pseudogene 3 Y-linked | Other |
| -5.436 | ENSG00000272667 | RP11_395A132  | chondroitin sulfate proteoglycan 4 pseudogene 3 Y-linked | Other |
| -6.231 | ENSG00000260296 | RP11_395I63   | chondroitin sulfate proteoglycan 4 pseudogene 3 Y-linked | Other |
| -6.207 | ENSG00000272562 | RP11_396C234  | chondroitin sulfate proteoglycan 4 pseudogene 3 Y-linked | Other |
| -6.031 | ENSG00000235358 | RP11_399E61   | chondroitin sulfate proteoglycan 4 pseudogene 3 Y-linked | Other |
| -6.302 | ENSG00000261438 | RP11_399O199  | chondroitin sulfate proteoglycan 4 pseudogene 3 Y-linked | Other |
| -6.002 | ENSG00000241157 | RP11_3K241    | chondroitin sulfate proteoglycan 4 pseudogene 3 Y-linked | Other |
| -6.131 | ENSG00000230735 | RP11_413E14   | chondroitin sulfate proteoglycan 4 pseudogene 3 Y-linked | Other |
| -6.578 | ENSG00000271964 | RP11_415F232  | chondroitin sulfate proteoglycan 4 pseudogene 3 Y-linked | Other |
| -6.105 | ENSG00000272529 | RP11_415F234  | chondroitin sulfate proteoglycan 4 pseudogene 3 Y-linked | Other |
| -5.913 | ENSG00000270115 | RP11_415J87   | chondroitin sulfate proteoglycan 4 pseudogene 3 Y-linked | Other |
| -7.098 | ENSG00000272054 | RP11_423P102  | chondroitin sulfate proteoglycan 4 pseudogene 3 Y-linked | Other |
| -5.67  | ENSG00000260197 | RP11_424G141  | chondroitin sulfate proteoglycan 4 pseudogene 3 Y-linked | Other |
| -7.051 | ENSG00000260517 | RP11_426C225  | chondroitin sulfate proteoglycan 4 pseudogene 3 Y-linked | Other |
| -6.949 | ENSG00000240219 | RP11_430C75   | chondroitin sulfate proteoglycan 4 pseudogene 3 Y-linked | Other |
| -6.27  | ENSG00000238058 | RP11_432J222  | chondroitin sulfate proteoglycan 4 pseudogene 3 Y-linked | Other |
| -6.435 | ENSG00000273174 | RP11_434H66   | chondroitin sulfate proteoglycan 4 pseudogene 3 Y-linked | Other |
| -7.343 | ENSG00000273245 | RP11_434P112  | chondroitin sulfate proteoglycan 4 pseudogene 3 Y-linked | Other |
| -5.127 | ENSG00000241889 | RP11_435F173  | chondroitin sulfate proteoglycan 4 pseudogene 3 Y-linked | Other |
| -5.041 | ENSG00000254207 | RP11_43A141   | chondroitin sulfate proteoglycan 4 pseudogene 3 Y-linked | Other |
| -6.255 | ENSG00000258111 | RP11_43D42    | chondroitin sulfate proteoglycan 4 pseudogene 3 Y-linked | Other |
| -5.936 | ENSG00000258082 | RP11_443B73   | chondroitin sulfate proteoglycan 4 pseudogene 3 Y-linked | Other |
| -7.163 | ENSG00000261490 | RP11_448G153  | chondroitin sulfate proteoglycan 4 pseudogene 3 Y-linked | Other |
| -7.538 | ENSG00000273151 | RP11_449P152  | chondroitin sulfate proteoglycan 4 pseudogene 3 Y-linked | Other |
| -5.609 | ENSG00000262714 | RP11_44F148   | chondroitin sulfate proteoglycan 4 pseudogene 3 Y-linked | Other |
| -8.491 | ENSG00000253372 | RP11_44N111   | chondroitin sulfate proteoglycan 4 pseudogene 3 Y-linked | Other |
| -7.143 | ENSG00000272839 | RP11_452C131  | chondroitin sulfate proteoglycan 4 pseudogene 3 Y-linked | Other |
| -8.56  | ENSG00000261208 | RP11_452D121  | chondroitin sulfate proteoglycan 4 pseudogene 3 Y-linked | Other |
| -5.327 | ENSG00000261056 | RP11_454F82   | chondroitin sulfate proteoglycan 4 pseudogene 3 Y-linked | Other |
| -7.056 | ENSG00000259318 | RP11_454L92   | chondroitin sulfate proteoglycan 4 pseudogene 3 Y-linked | Other |
| -7.181 | ENSG00000261416 | RP11_455F55   | chondroitin sulfate proteoglycan 4 pseudogene 3 Y-linked | Other |
| -6.051 | ENSG00000232546 | RP11_458F81   | chondroitin sulfate proteoglycan 4 pseudogene 3 Y-linked | Other |
| -6.261 | ENSG00000272555 | RP11_459I191  | chondroitin sulfate proteoglycan 4 pseudogene 3 Y-linked | Other |
| -6.338 | ENSG00000264546 | RP11_464D206  | chondroitin sulfate proteoglycan 4 pseudogene 3 Y-linked | Other |
| -5.119 | ENSG00000272735 | RP11_467P91   | chondroitin sulfate proteoglycan 4 pseudogene 3 Y-linked | Other |
| -7.306 | ENSG00000259321 | RP11_468E25   | chondroitin sulfate proteoglycan 4 pseudogene 3 Y-linked | Other |
| -5.207 | ENSG00000243155 | RP11_46A105   | chondroitin sulfate proteoglycan 4 pseudogene 3 Y-linked | Other |
| -5.737 | ENSG00000259877 | RP11_46C247   | chondroitin sulfate proteoglycan 4 pseudogene 3 Y-linked | Other |
| -6.498 | ENSG00000261512 | RP11_46D61    | chondroitin sulfate proteoglycan 4 pseudogene 3 Y-linked | Other |
| -8.582 | ENSG00000262370 | RP11_473M209  | chondroitin sulfate proteoglycan 4 pseudogene 3 Y-linked | Other |
| -6.794 | ENSG00000235381 | RP11_477D192  | chondroitin sulfate proteoglycan 4 pseudogene 3 Y-linked | Other |
| -7.021 | ENSG00000217512 | RP11_477E32   | chondroitin sulfate proteoglycan 4 pseudogene 3 Y-linked | Other |
| -6.81  | ENSG00000273038 | RP11_479G228  | chondroitin sulfate proteoglycan 4 pseudogene 3 Y-linked | Other |
| -6.177 | ENSG00000232334 | RP11_47G112   | chondroitin sulfate proteoglycan 4 pseudogene 3 Y-linked | Other |
| -5.788 | ENSG00000235449 | RP11_480I122  | chondroitin sulfate proteoglycan 4 pseudogene 3 Y-linked | Other |
| -5.555 | ENSG00000251379 | RP11_480A201  | chondroitin sulfate proteoglycan 4 pseudogene 3 Y-linked | Other |
| -7.999 | ENSG00000259865 | RP11_488L1810 | chondroitin sulfate proteoglycan 4 pseudogene 3 Y-linked | Other |
| -5.709 | ENSG00000229447 | RP11_490K74   | chondroitin sulfate proteoglycan 4 pseudogene 3 Y-linked | Other |
| -5.837 | ENSG00000262663 | RP11_497H171  | chondroitin sulfate proteoglycan 4 pseudogene 3 Y-linked | Other |
| -7.451 | ENSG00000263731 | RP11_498C915  | chondroitin sulfate proteoglycan 4 pseudogene 3 Y-linked | Other |
| -5.865 | ENSG00000269970 | RP11_498E29   | chondroitin sulfate proteoglycan 4 pseudogene 3 Y-linked | Other |
| -6.255 | ENSG00000236095 | RP11_49O142   | chondroitin sulfate proteoglycan 4 pseudogene 3 Y-linked | Other |
| -6.749 | ENSG00000227076 | RP11_4C204    | chondroitin sulfate proteoglycan 4 pseudogene 3 Y-linked | Other |
| -7.092 | ENSG00000254165 | RP11_503E242  | chondroitin sulfate proteoglycan 4 pseudogene 3 Y-linked | Other |
| -6.508 | ENSG00000272983 | RP11_508N2212 | chondroitin sulfate proteoglycan 4 pseudogene 3 Y-linked | Other |

|         |                 |               |                                                          |       |
|---------|-----------------|---------------|----------------------------------------------------------|-------|
| -6.02   | ENSG00000257322 | RP11_511B232  | chondroitin sulfate proteoglycan 4 pseudogene 3 Y-linked | Other |
| -6.193  | ENSG00000258230 | RP11_511H93   | chondroitin sulfate proteoglycan 4 pseudogene 3 Y-linked | Other |
| -5.666  | ENSG00000266801 | RP11_521L92   | chondroitin sulfate proteoglycan 4 pseudogene 3 Y-linked | Other |
| -5.431  | ENSG00000262503 | RP11_530N72   | chondroitin sulfate proteoglycan 4 pseudogene 3 Y-linked | Other |
| -5.728  | ENSG00000272906 | RP11_533E197  | chondroitin sulfate proteoglycan 4 pseudogene 3 Y-linked | Other |
| -5.728  | ENSG00000261000 | RP11_534L205  | chondroitin sulfate proteoglycan 4 pseudogene 3 Y-linked | Other |
| -5.693  | ENSG00000232807 | RP11_536K73   | chondroitin sulfate proteoglycan 4 pseudogene 3 Y-linked | Other |
| -6.621  | ENSG00000272746 | RP11_53B26    | chondroitin sulfate proteoglycan 4 pseudogene 3 Y-linked | Other |
| -7.29   | ENSG00000272335 | RP11_53O193   | chondroitin sulfate proteoglycan 4 pseudogene 3 Y-linked | Other |
| -3.917  | ENSG00000227081 | RP11_543P151  | chondroitin sulfate proteoglycan 4 pseudogene 3 Y-linked | Other |
| -5.927  | ENSG00000273466 | RP11_548H31   | chondroitin sulfate proteoglycan 4 pseudogene 3 Y-linked | Other |
| -6.383  | ENSG00000251023 | RP11_549J181  | chondroitin sulfate proteoglycan 4 pseudogene 3 Y-linked | Other |
| -5.742  | ENSG00000214067 | RP11_549L63   | chondroitin sulfate proteoglycan 4 pseudogene 3 Y-linked | Other |
| -6.29   | ENSG00000228417 | RP11_549L63   | chondroitin sulfate proteoglycan 4 pseudogene 3 Y-linked | Other |
| -7.311  | ENSG00000260601 | RP11_552C151  | chondroitin sulfate proteoglycan 4 pseudogene 3 Y-linked | Other |
| -6.244  | ENSG00000260948 | RP11_552M118  | chondroitin sulfate proteoglycan 4 pseudogene 3 Y-linked | Other |
| -5.509  | ENSG00000225948 | RP11_554I81   | chondroitin sulfate proteoglycan 4 pseudogene 3 Y-linked | Other |
| -6.779  | ENSG00000271851 | RP11_565F192  | chondroitin sulfate proteoglycan 4 pseudogene 3 Y-linked | Other |
| -7.434  | ENSG00000255358 | RP11_567O181  | chondroitin sulfate proteoglycan 4 pseudogene 3 Y-linked | Other |
| -5.634  | ENSG00000272650 | RP11_571I184  | chondroitin sulfate proteoglycan 4 pseudogene 3 Y-linked | Other |
| -4.976  | ENSG00000257342 | RP11_571M67   | chondroitin sulfate proteoglycan 4 pseudogene 3 Y-linked | Other |
| -5.666  | ENSG00000270195 | RP11_572O171  | chondroitin sulfate proteoglycan 4 pseudogene 3 Y-linked | Other |
| -5.691  | ENSG00000272140 | RP11_574K1129 | chondroitin sulfate proteoglycan 4 pseudogene 3 Y-linked | Other |
| -6.582  | ENSG00000235298 | RP11_575L78   | chondroitin sulfate proteoglycan 4 pseudogene 3 Y-linked | Other |
| -5.345  | ENSG00000216809 | RP11_57K171   | chondroitin sulfate proteoglycan 4 pseudogene 3 Y-linked | Other |
| -6.563  | ENSG00000263766 | RP11_580I162  | chondroitin sulfate proteoglycan 4 pseudogene 3 Y-linked | Other |
| -7.979  | ENSG00000253200 | RP11_582J165  | chondroitin sulfate proteoglycan 4 pseudogene 3 Y-linked | Other |
| -5.895  | ENSG00000257497 | RP11_585P45   | chondroitin sulfate proteoglycan 4 pseudogene 3 Y-linked | Other |
| -6.272  | ENSG00000269899 | RP11_589N152  | chondroitin sulfate proteoglycan 4 pseudogene 3 Y-linked | Other |
| -7.074  | ENSG00000262089 | RP11_589P105  | chondroitin sulfate proteoglycan 4 pseudogene 3 Y-linked | Other |
| -6.306  | ENSG00000251429 | RP11_597D137  | chondroitin sulfate proteoglycan 4 pseudogene 3 Y-linked | Other |
| -5.897  | ENSG00000272760 | RP11_5C231    | chondroitin sulfate proteoglycan 4 pseudogene 3 Y-linked | Other |
| -5.679  | ENSG00000255097 | RP11_5L121    | chondroitin sulfate proteoglycan 4 pseudogene 3 Y-linked | Other |
| -5.905  | ENSG00000260285 | RP11_600F247  | chondroitin sulfate proteoglycan 4 pseudogene 3 Y-linked | Other |
| -5.7    | ENSG00000258317 | RP11_603J245  | chondroitin sulfate proteoglycan 4 pseudogene 3 Y-linked | Other |
| -7.289  | ENSG00000256361 | RP11_613F226  | chondroitin sulfate proteoglycan 4 pseudogene 3 Y-linked | Other |
| -6.889  | ENSG00000261471 | RP11_61F121   | chondroitin sulfate proteoglycan 4 pseudogene 3 Y-linked | Other |
| -7.315  | ENSG00000261220 | RP11_629O12   | chondroitin sulfate proteoglycan 4 pseudogene 3 Y-linked | Other |
| -5.996  | ENSG00000254912 | RP11_632K202  | chondroitin sulfate proteoglycan 4 pseudogene 3 Y-linked | Other |
| -6.454  | ENSG00000267430 | RP11_635N192  | chondroitin sulfate proteoglycan 4 pseudogene 3 Y-linked | Other |
| -4.635  | ENSG00000258904 | RP11_638I22   | chondroitin sulfate proteoglycan 4 pseudogene 3 Y-linked | Other |
| -6.926  | ENSG00000270277 | RP11_65L32    | chondroitin sulfate proteoglycan 4 pseudogene 3 Y-linked | Other |
| -5.949  | ENSG00000270956 | RP11_65L34    | chondroitin sulfate proteoglycan 4 pseudogene 3 Y-linked | Other |
| -6.165  | ENSG00000254741 | RP11_661A127  | chondroitin sulfate proteoglycan 4 pseudogene 3 Y-linked | Other |
| -6.519  | ENSG00000255710 | RP11_667M199  | chondroitin sulfate proteoglycan 4 pseudogene 3 Y-linked | Other |
| -6.266  | ENSG00000223356 | RP11_66D175   | chondroitin sulfate proteoglycan 4 pseudogene 3 Y-linked | Other |
| -6.624  | ENSG00000255893 | RP11_685N101  | chondroitin sulfate proteoglycan 4 pseudogene 3 Y-linked | Other |
| -9.603  | ENSG00000267554 | RP11_686D2210 | chondroitin sulfate proteoglycan 4 pseudogene 3 Y-linked | Other |
| -7.519  | ENSG00000267102 | RP11_686D227  | chondroitin sulfate proteoglycan 4 pseudogene 3 Y-linked | Other |
| -7.035  | ENSG00000267745 | RP11_686D228  | chondroitin sulfate proteoglycan 4 pseudogene 3 Y-linked | Other |
| -5.797  | ENSG00000267587 | RP11_687F64   | chondroitin sulfate proteoglycan 4 pseudogene 3 Y-linked | Other |
| -8.491  | ENSG00000265625 | RP11_68I311   | chondroitin sulfate proteoglycan 4 pseudogene 3 Y-linked | Other |
| -6.598  | ENSG00000270441 | RP11_694I157  | chondroitin sulfate proteoglycan 4 pseudogene 3 Y-linked | Other |
| -6.661  | ENSG00000269924 | RP11_697N184  | chondroitin sulfate proteoglycan 4 pseudogene 3 Y-linked | Other |
| -6.256  | ENSG00000271347 | RP11_701H247  | chondroitin sulfate proteoglycan 4 pseudogene 3 Y-linked | Other |
| -4.93   | ENSG00000259682 | RP11_702L154  | chondroitin sulfate proteoglycan 4 pseudogene 3 Y-linked | Other |
| -10.035 | ENSG00000257027 | RP11_705C153  | chondroitin sulfate proteoglycan 4 pseudogene 3 Y-linked | Other |
| -5.963  | ENSG00000225643 | RP11_70P171   | chondroitin sulfate proteoglycan 4 pseudogene 3 Y-linked | Other |
| -7.149  | ENSG00000266965 | RP11_712P202  | chondroitin sulfate proteoglycan 4 pseudogene 3 Y-linked | Other |
| -6.275  | ENSG00000272502 | RP11_713M152  | chondroitin sulfate proteoglycan 4 pseudogene 3 Y-linked | Other |
| -5.672  | ENSG00000214773 | RP11_717D121  | chondroitin sulfate proteoglycan 4 pseudogene 3 Y-linked | Other |
| -6.347  | ENSG00000265801 | RP11_720N192  | chondroitin sulfate proteoglycan 4 pseudogene 3 Y-linked | Other |
| -6.805  | ENSG00000253586 | RP11_723D222  | chondroitin sulfate proteoglycan 4 pseudogene 3 Y-linked | Other |
| -5.74   | ENSG00000254676 | RP11_727A234  | chondroitin sulfate proteoglycan 4 pseudogene 3 Y-linked | Other |
| -7.122  | ENSG00000263606 | RP11_737O243  | chondroitin sulfate proteoglycan 4 pseudogene 3 Y-linked | Other |
| -6.988  | ENSG00000272625 | RP11_737O245  | chondroitin sulfate proteoglycan 4 pseudogene 3 Y-linked | Other |
| -7.359  | ENSG00000270108 | RP11_73M186   | chondroitin sulfate proteoglycan 4 pseudogene 3 Y-linked | Other |
| -9.073  | ENSG00000269958 | RP11_73M188   | chondroitin sulfate proteoglycan 4 pseudogene 3 Y-linked | Other |
| -10.408 | ENSG00000255197 | RP11_750H95   | chondroitin sulfate proteoglycan 4 pseudogene 3 Y-linked | Other |
| -5.26   | ENSG00000270072 | RP11_750H97   | chondroitin sulfate proteoglycan 4 pseudogene 3 Y-linked | Other |
| -5.731  | ENSG00000240211 | RP11_758P173  | chondroitin sulfate proteoglycan 4 pseudogene 3 Y-linked | Other |
| -6.768  | ENSG00000267263 | RP11_75C107   | chondroitin sulfate proteoglycan 4 pseudogene 3 Y-linked | Other |
| -6.243  | ENSG00000259562 | RP11_762H82   | chondroitin sulfate proteoglycan 4 pseudogene 3 Y-linked | Other |
| -6.261  | ENSG00000257509 | RP11_762I74   | chondroitin sulfate proteoglycan 4 pseudogene 3 Y-linked | Other |
| -6.617  | ENSG00000259939 | RP11_77H95    | chondroitin sulfate proteoglycan 4 pseudogene 3 Y-linked | Other |
| -6.801  | ENSG00000260979 | RP11_77H98    | chondroitin sulfate proteoglycan 4 pseudogene 3 Y-linked | Other |
| -5.492  | ENSG00000261476 | RP11_77K123   | chondroitin sulfate proteoglycan 4 pseudogene 3 Y-linked | Other |
| -7.061  | ENSG00000256712 | RP11_785H52   | chondroitin sulfate proteoglycan 4 pseudogene 3 Y-linked | Other |
| -6.154  | ENSG00000270091 | RP11_78O72    | chondroitin sulfate proteoglycan 4 pseudogene 3 Y-linked | Other |
| -7.905  | ENSG00000272831 | RP11_792A84   | chondroitin sulfate proteoglycan 4 pseudogene 3 Y-linked | Other |
| -8.019  | ENSG00000245904 | RP11_796E24   | chondroitin sulfate proteoglycan 4 pseudogene 3 Y-linked | Other |
| -8.623  | ENSG00000259652 | RP11_797A183  | chondroitin sulfate proteoglycan 4 pseudogene 3 Y-linked | Other |
| -5.418  | ENSG00000267246 | RP11_798G77   | chondroitin sulfate proteoglycan 4 pseudogene 3 Y-linked | Other |
| -7.15   | ENSG00000248774 | RP11_798M193  | chondroitin sulfate proteoglycan 4 pseudogene 3 Y-linked | Other |
| -6.547  | ENSG00000266947 | RP11_799D44   | chondroitin sulfate proteoglycan 4 pseudogene 3 Y-linked | Other |
| -8.034  | ENSG00000260401 | RP11_800A34   | chondroitin sulfate proteoglycan 4 pseudogene 3 Y-linked | Other |
| -6.274  | ENSG00000272182 | RP11_802O233  | chondroitin sulfate proteoglycan 4 pseudogene 3 Y-linked | Other |
| -5.218  | ENSG00000256928 | RP11_809N82   | chondroitin sulfate proteoglycan 4 pseudogene 3 Y-linked | Other |
| -7.698  | ENSG00000256448 | RP11_809N84   | chondroitin sulfate proteoglycan 4 pseudogene 3 Y-linked | Other |
| -5.945  | ENSG00000241679 | RP11_80H84    | chondroitin sulfate proteoglycan 4 pseudogene 3 Y-linked | Other |
| -6.761  | ENSG00000259453 | RP11_815J211  | chondroitin sulfate proteoglycan 4 pseudogene 3 Y-linked | Other |

|         |                 |                 |                                                          |       |
|---------|-----------------|-----------------|----------------------------------------------------------|-------|
| -6.697  | ENSG00000260274 | RP11_817O138    | chondroitin sulfate proteoglycan 4 pseudogene 3 Y-linked | Other |
| -7.319  | ENSG00000261098 | RP11_819C211    | chondroitin sulfate proteoglycan 4 pseudogene 3 Y-linked | Other |
| -6.443  | ENSG00000273141 | RP11_820I164    | chondroitin sulfate proteoglycan 4 pseudogene 3 Y-linked | Other |
| -6.534  | ENSG00000265713 | RP11_82O192     | chondroitin sulfate proteoglycan 4 pseudogene 3 Y-linked | Other |
| -5.948  | ENSG00000248477 | RP11_848G142    | chondroitin sulfate proteoglycan 4 pseudogene 3 Y-linked | Other |
| -9.771  | ENSG00000250138 | RP11_848G145    | chondroitin sulfate proteoglycan 4 pseudogene 3 Y-linked | Other |
| -8.352  | ENSG00000264456 | RP11_848P12     | chondroitin sulfate proteoglycan 4 pseudogene 3 Y-linked | Other |
| -7.364  | ENSG00000266865 | RP11_848P19     | chondroitin sulfate proteoglycan 4 pseudogene 3 Y-linked | Other |
| -6.37   | ENSG00000269967 | RP11_84A194     | chondroitin sulfate proteoglycan 4 pseudogene 3 Y-linked | Other |
| -8.242  | ENSG00000271736 | RP11_85G213     | chondroitin sulfate proteoglycan 4 pseudogene 3 Y-linked | Other |
| -5.583  | ENSG00000266844 | RP11_862L93     | chondroitin sulfate proteoglycan 4 pseudogene 3 Y-linked | Other |
| -6.807  | ENSG00000254452 | RP11_867G234    | chondroitin sulfate proteoglycan 4 pseudogene 3 Y-linked | Other |
| -6.3    | ENSG00000267397 | RP11_873E201    | chondroitin sulfate proteoglycan 4 pseudogene 3 Y-linked | Other |
| -6.405  | ENSG00000248980 | RP11_87F152     | chondroitin sulfate proteoglycan 4 pseudogene 3 Y-linked | Other |
| -7.99   | ENSG00000273284 | RP11_888D104    | chondroitin sulfate proteoglycan 4 pseudogene 3 Y-linked | Other |
| -5.907  | ENSG00000259600 | RP11_925D83     | chondroitin sulfate proteoglycan 4 pseudogene 3 Y-linked | Other |
| -6.913  | ENSG00000265982 | RP11_927P214    | chondroitin sulfate proteoglycan 4 pseudogene 3 Y-linked | Other |
| -6.033  | ENSG00000259483 | RP11_930O112    | chondroitin sulfate proteoglycan 4 pseudogene 3 Y-linked | Other |
| -5.395  | ENSG00000269974 | RP11_932O910    | chondroitin sulfate proteoglycan 4 pseudogene 3 Y-linked | Other |
| -6.718  | ENSG00000247728 | RP11_932O97     | chondroitin sulfate proteoglycan 4 pseudogene 3 Y-linked | Other |
| -7.768  | ENSG00000183458 | RP11_958N241    | chondroitin sulfate proteoglycan 4 pseudogene 3 Y-linked | Other |
| -5.686  | ENSG0000027827  | RP11_958N242    | chondroitin sulfate proteoglycan 4 pseudogene 3 Y-linked | Other |
| -6.875  | ENSG00000269973 | RP11_95D171     | chondroitin sulfate proteoglycan 4 pseudogene 3 Y-linked | Other |
| -6.649  | ENSG00000261218 | RP11_960L181    | chondroitin sulfate proteoglycan 4 pseudogene 3 Y-linked | Other |
| -4.725  | ENSG00000262791 | RP11_961A151    | chondroitin sulfate proteoglycan 4 pseudogene 3 Y-linked | Other |
| -5.568  | ENSG00000237280 | RP11_96C239     | chondroitin sulfate proteoglycan 4 pseudogene 3 Y-linked | Other |
| -6.928  | ENSG00000263276 | RP11_96D110     | chondroitin sulfate proteoglycan 4 pseudogene 3 Y-linked | Other |
| -6.096  | ENSG00000262514 | RP11_96D19      | chondroitin sulfate proteoglycan 4 pseudogene 3 Y-linked | Other |
| -5.774  | ENSG00000252761 | RP11_96H191     | chondroitin sulfate proteoglycan 4 pseudogene 3 Y-linked | Other |
| -6.587  | ENSG00000232811 | RP11_96K192     | chondroitin sulfate proteoglycan 4 pseudogene 3 Y-linked | Other |
| -6.41   | ENSG00000260302 | RP11_973H71     | chondroitin sulfate proteoglycan 4 pseudogene 3 Y-linked | Other |
| -5.064  | ENSG00000271870 | RP11_97C161     | chondroitin sulfate proteoglycan 4 pseudogene 3 Y-linked | Other |
| -7.582  | ENSG00000261451 | RP11_981G71     | chondroitin sulfate proteoglycan 4 pseudogene 3 Y-linked | Other |
| -5.642  | ENSG00000258430 | RP11_982M152    | chondroitin sulfate proteoglycan 4 pseudogene 3 Y-linked | Other |
| -4.742  | ENSG00000257475 | RP11_983P162    | chondroitin sulfate proteoglycan 4 pseudogene 3 Y-linked | Other |
| -5.982  | ENSG00000265458 | RP13_20L146     | chondroitin sulfate proteoglycan 4 pseudogene 3 Y-linked | Other |
| -7.352  | ENSG00000228906 | RP13_216E224    | chondroitin sulfate proteoglycan 4 pseudogene 3 Y-linked | Other |
| -6.679  | ENSG00000223511 | RP13_297E164    | chondroitin sulfate proteoglycan 4 pseudogene 3 Y-linked | Other |
| -4.892  | ENSG00000261529 | RP13_487P221    | chondroitin sulfate proteoglycan 4 pseudogene 3 Y-linked | Other |
| -7.724  | ENSG00000260563 | RP13_516M141    | chondroitin sulfate proteoglycan 4 pseudogene 3 Y-linked | Other |
| -7.508  | ENSG00000262652 | RP13_638C32     | chondroitin sulfate proteoglycan 4 pseudogene 3 Y-linked | Other |
| -5.101  | ENSG00000227627 | RP1_101K106     | chondroitin sulfate proteoglycan 4 pseudogene 3 Y-linked | Other |
| -5.949  | ENSG00000271913 | RP1_111C204     | chondroitin sulfate proteoglycan 4 pseudogene 3 Y-linked | Other |
| -5.66   | ENSG00000272341 | RP1_151F172     | chondroitin sulfate proteoglycan 4 pseudogene 3 Y-linked | Other |
| -5.751  | ENSG00000227920 | RP1_153P145     | chondroitin sulfate proteoglycan 4 pseudogene 3 Y-linked | Other |
| -5.632  | ENSG00000227598 | RP1_167A142     | chondroitin sulfate proteoglycan 4 pseudogene 3 Y-linked | Other |
| -5.924  | ENSG00000261692 | RP1_168P161     | chondroitin sulfate proteoglycan 4 pseudogene 3 Y-linked | Other |
| -6.36   | ENSG00000246982 | RP1_179N166     | chondroitin sulfate proteoglycan 4 pseudogene 3 Y-linked | Other |
| -7.198  | ENSG00000213172 | RP1_228H132     | chondroitin sulfate proteoglycan 4 pseudogene 3 Y-linked | Other |
| -5.752  | ENSG00000260920 | RP1_228H135     | chondroitin sulfate proteoglycan 4 pseudogene 3 Y-linked | Other |
| -5.626  | ENSG00000240399 | ENSG00000240399 | chondroitin sulfate proteoglycan 4 pseudogene 3 Y-linked | Other |
| -6.508  | ENSG00000218809 | RP1_229K205     | chondroitin sulfate proteoglycan 4 pseudogene 3 Y-linked | Other |
| -5.986  | ENSG00000270083 | RP1_257I2014    | chondroitin sulfate proteoglycan 4 pseudogene 3 Y-linked | Other |
| -8.788  | ENSG00000235111 | RP1_29C188      | chondroitin sulfate proteoglycan 4 pseudogene 3 Y-linked | Other |
| -7.795  | ENSG00000213279 | RP1_29C189      | chondroitin sulfate proteoglycan 4 pseudogene 3 Y-linked | Other |
| -5.685  | ENSG00000272345 | RP1_30M35       | chondroitin sulfate proteoglycan 4 pseudogene 3 Y-linked | Other |
| -8.171  | ENSG00000251194 | RP1_68D182      | chondroitin sulfate proteoglycan 4 pseudogene 3 Y-linked | Other |
| -5.361  | ENSG00000231769 | RP1_88B14       | chondroitin sulfate proteoglycan 4 pseudogene 3 Y-linked | Other |
| -6.827  | ENSG00000213204 | RP3-382I10.7    | chondroitin sulfate proteoglycan 4 pseudogene 3 Y-linked | Other |
| -6.256  | ENSG00000272449 | RP3_395M2012    | chondroitin sulfate proteoglycan 4 pseudogene 3 Y-linked | Other |
| -6.445  | ENSG00000228140 | RP3_467K164     | chondroitin sulfate proteoglycan 4 pseudogene 3 Y-linked | Other |
| -8.641  | ENSG00000231113 | RP3_475N161     | chondroitin sulfate proteoglycan 4 pseudogene 3 Y-linked | Other |
| -3.613  | ENSG00000235008 | RP3_497J211     | chondroitin sulfate proteoglycan 4 pseudogene 3 Y-linked | Other |
| -6.404  | ENSG00000230149 | RP3_508I1519    | chondroitin sulfate proteoglycan 4 pseudogene 3 Y-linked | Other |
| -5.901  | ENSG00000273096 | RP3_508I1520    | chondroitin sulfate proteoglycan 4 pseudogene 3 Y-linked | Other |
| -6.283  | ENSG00000261582 | RP4-614O4.11    | chondroitin sulfate proteoglycan 4 pseudogene 3 Y-linked | Other |
| -5.771  | ENSG00000266993 | RP4-657D16.3    | chondroitin sulfate proteoglycan 4 pseudogene 3 Y-linked | Other |
| -5.898  | ENSG00000231485 | RP4_535B201     | chondroitin sulfate proteoglycan 4 pseudogene 3 Y-linked | Other |
| -5.656  | ENSG00000244198 | RP4_545C241     | chondroitin sulfate proteoglycan 4 pseudogene 3 Y-linked | Other |
| -4.597  | ENSG00000224635 | RP4_564F225     | chondroitin sulfate proteoglycan 4 pseudogene 3 Y-linked | Other |
| -4.76   | ENSG00000225938 | RP4_575N64      | chondroitin sulfate proteoglycan 4 pseudogene 3 Y-linked | Other |
| -7.846  | ENSG00000242324 | RP4_576H242     | chondroitin sulfate proteoglycan 4 pseudogene 3 Y-linked | Other |
| -6.331  | ENSG00000268858 | RP4_591C209     | chondroitin sulfate proteoglycan 4 pseudogene 3 Y-linked | Other |
| -9.368  | ENSG00000225616 | RP4_604A211     | chondroitin sulfate proteoglycan 4 pseudogene 3 Y-linked | Other |
| -5.682  | ENSG00000272368 | RP4_605O34      | chondroitin sulfate proteoglycan 4 pseudogene 3 Y-linked | Other |
| -6.963  | ENSG00000271895 | RP4_635E188     | chondroitin sulfate proteoglycan 4 pseudogene 3 Y-linked | Other |
| -7.659  | ENSG00000258944 | RP4_647C143     | chondroitin sulfate proteoglycan 4 pseudogene 3 Y-linked | Other |
| -10.054 | ENSG00000260997 | RP4_647J211     | chondroitin sulfate proteoglycan 4 pseudogene 3 Y-linked | Other |
| -4.795  | ENSG00000237094 | RP4_669L1710    | chondroitin sulfate proteoglycan 4 pseudogene 3 Y-linked | Other |
| -5.959  | ENSG00000240143 | RP4_753P93      | chondroitin sulfate proteoglycan 4 pseudogene 3 Y-linked | Other |
| -5.664  | ENSG00000272455 | RP4_758J1813    | chondroitin sulfate proteoglycan 4 pseudogene 3 Y-linked | Other |
| -7.555  | ENSG00000258634 | RP4_773N104     | chondroitin sulfate proteoglycan 4 pseudogene 3 Y-linked | Other |
| -5.694  | ENSG00000228830 | RP4_781K52      | chondroitin sulfate proteoglycan 4 pseudogene 3 Y-linked | Other |
| -6.284  | ENSG00000226396 | RP5-1056L3.3    | chondroitin sulfate proteoglycan 4 pseudogene 3 Y-linked | Other |
| -4.891  | ENSG00000248503 | RP5_1000K242    | chondroitin sulfate proteoglycan 4 pseudogene 3 Y-linked | Other |
| -4.94   | ENSG00000258653 | RP5_1021I204    | chondroitin sulfate proteoglycan 4 pseudogene 3 Y-linked | Other |
| -5.168  | ENSG00000270140 | RP5_1021I206    | chondroitin sulfate proteoglycan 4 pseudogene 3 Y-linked | Other |
| -7.556  | ENSG00000237788 | RP5_1041C103    | chondroitin sulfate proteoglycan 4 pseudogene 3 Y-linked | Other |
| -7.725  | ENSG00000261662 | RP5_1042I87     | chondroitin sulfate proteoglycan 4 pseudogene 3 Y-linked | Other |
| -5.963  | ENSG00000273382 | RP5_1065J228    | chondroitin sulfate proteoglycan 4 pseudogene 3 Y-linked | Other |
| -8.396  | ENSG00000260257 | RP5_1085F173    | chondroitin sulfate proteoglycan 4 pseudogene 3 Y-linked | Other |



|         |                 |                |                                                                    |                     |
|---------|-----------------|----------------|--------------------------------------------------------------------|---------------------|
| -7.054  | ENSG00000224950 | RP5_1086K131   | chondroitin sulfate proteoglycan 4 pseudogene 3 Y-linked           | Other               |
| -5.726  | ENSG00000270605 | RP5_1092A34    | chondroitin sulfate proteoglycan 4 pseudogene 3 Y-linked           | Other               |
| -7.377  | ENSG00000263120 | RP5_1107A174   | chondroitin sulfate proteoglycan 4 pseudogene 3 Y-linked           | Other               |
| -5.819  | ENSG00000271789 | RP5_1112D67    | chondroitin sulfate proteoglycan 4 pseudogene 3 Y-linked           | Other               |
| -6.523  | ENSG00000273314 | RP5_1136G132   | chondroitin sulfate proteoglycan 4 pseudogene 3 Y-linked           | Other               |
| -6.269  | ENSG00000269890 | RP5_1139B122   | chondroitin sulfate proteoglycan 4 pseudogene 3 Y-linked           | Other               |
| -6.852  | ENSG00000225113 | RP5_1160K13    | chondroitin sulfate proteoglycan 4 pseudogene 3 Y-linked           | Other               |
| -6.085  | ENSG00000272982 | RP5_1180E214   | chondroitin sulfate proteoglycan 4 pseudogene 3 Y-linked           | Other               |
| -7.171  | ENSG00000273221 | RP5_1180E215   | chondroitin sulfate proteoglycan 4 pseudogene 3 Y-linked           | Other               |
| -5.585  | ENSG00000267457 | RP5_837J14     | chondroitin sulfate proteoglycan 4 pseudogene 3 Y-linked           | Other               |
| -6.071  | ENSG00000239291 | RP5_867C241    | chondroitin sulfate proteoglycan 4 pseudogene 3 Y-linked           | Other               |
| -6.998  | ENSG00000262265 | RP5_867C244    | chondroitin sulfate proteoglycan 4 pseudogene 3 Y-linked           | Other               |
| -4.156  | ENSG00000260793 | RP5_882C22     | chondroitin sulfate proteoglycan 4 pseudogene 3 Y-linked           | Other               |
| -6.844  | ENSG00000247853 | RP5_940J56     | chondroitin sulfate proteoglycan 4 pseudogene 3 Y-linked           | Other               |
| -6.549  | ENSG00000269968 | RP5_940J59     | chondroitin sulfate proteoglycan 4 pseudogene 3 Y-linked           | Other               |
| -5.781  | ENSG00000272931 | RP5_943J32     | chondroitin sulfate proteoglycan 4 pseudogene 3 Y-linked           | Other               |
| -6.879  | ENSG00000243696 | RP5_966M16     | chondroitin sulfate proteoglycan 4 pseudogene 3 Y-linked           | Other               |
| -6.591  | ENSG00000229591 | RP5_981O72     | chondroitin sulfate proteoglycan 4 pseudogene 3 Y-linked           | Other               |
| -5.607  | ENSG00000232031 | RP5_991C64     | chondroitin sulfate proteoglycan 4 pseudogene 3 Y-linked           | Other               |
| -5.208  | ENSG00000273289 | RP6_109B75     | chondroitin sulfate proteoglycan 4 pseudogene 3 Y-linked           | Other               |
| -6.791  | ENSG00000205763 | RP9P           | RP9 pseudogene                                                     | Other               |
| -7.805  | ENSG00000092200 | RPGRI1         | RPRG interacting protein 1                                         | Extracellular Space |
| -7.325  | ENSG00000103494 | RPGRI1L        | RPRGRI1 like                                                       | Cytoplasm           |
| -9.025  | ENSG00000089169 | RPH3A          | rabphilin 3A                                                       | Plasma Membrane     |
| -6.761  | ENSG00000233609 | RPL10P19       | ribosomal protein L10 pseudogene 19                                | Other               |
| -4.826  | ENSG00000233913 | RPL10P9        | ribosomal protein L10 pseudogene 9                                 | Other               |
| -5.825  | ENSG00000239272 | RPL21P10       | ribosomal protein L21 pseudogene 10                                | Other               |
| -8.59   | ENSG00000240531 | RPL21P123      | ribosomal protein L21 pseudogene 123                               | Other               |
| -5.317  | ENSG00000220749 | RPL21P28       | ribosomal protein L21 pseudogene 28                                | Other               |
| -5.406  | ENSG00000213860 | RPL21P75       | ribosomal protein L21 pseudogene 75                                | Other               |
| -4.38   | ENSG00000225067 | RPL23AP2       | ribosomal protein L23a pseudogene 2                                | Other               |
| -6.001  | ENSG00000223508 | RPL23AP53      | ribosomal protein L23a pseudogene 53                               | Other               |
| -3.581  | ENSG00000227694 | RPL23AP74      | ribosomal protein L23a pseudogene 74                               | Other               |
| -7.535  | ENSG00000224796 | RPL32P1        | ribosomal protein L32 pseudogene 1                                 | Other               |
| -5.536  | ENSG00000251474 | RPL32P3        | ribosomal protein L32 pseudogene 3                                 | Other               |
| -5.362  | ENSG00000231508 | RPL34P20       | ribosomal protein L34 pseudogene 20                                | Other               |
| -3.097  | ENSG00000198918 | RPL39          | ribosomal protein L39                                              | Cytoplasm           |
| -5.681  | ENSG00000235174 | RPL39P3        | ribosomal protein L39 pseudogene 3                                 | Other               |
| -5.533  | ENSG00000230071 | RPL4P6         | ribosomal protein L4 pseudogene 6                                  | Other               |
| -5.262  | ENSG00000242697 | RPL5P12        | ribosomal protein L5 pseudogene 12                                 | Other               |
| -5.027  | ENSG00000214727 | RPL5P35        | ribosomal protein L5 pseudogene 35                                 | Other               |
| -6.869  | ENSG00000213152 | RPL7AP60       | ribosomal protein L7a pseudogene 60                                | Other               |
| -7.494  | ENSG00000213876 | RPL7AP64       | ribosomal protein L7a pseudogene 64                                | Other               |
| -6.8    | ENSG00000243806 | RPL7P18        | ribosomal protein L7 pseudogene 18                                 | Other               |
| -6.095  | ENSG00000229917 | RPL7P46        | ribosomal protein L7 pseudogene 46                                 | Other               |
| -6.798  | ENSG00000124787 | RPP40          | ribonuclease P/MRP subunit p40                                     | Nucleus             |
| -6.665  | ENSG00000240435 | RPS12P27       | ribosomal protein S12 pseudogene 27                                | Other               |
| -6.959  | ENSG00000225447 | RPS15AP10      | ribosomal protein S15a pseudogene 10                               | Other               |
| -6.51   | ENSG00000217527 | RPS16P5        | ribosomal protein S16 pseudogene 5                                 | Other               |
| -5.145  | ENSG00000241641 | RPS23P6        | ribosomal protein S23 pseudogene 6                                 | Other               |
| -6.702  | ENSG00000232437 | RPS26P42       | ribosomal protein S26 pseudogene 42                                | Other               |
| -6.498  | ENSG00000225224 | RPS27AP12      | ribosomal protein S27a pseudogene 12                               | Other               |
| -5.88   | ENSG00000227097 | RPS28P7        | ribosomal protein S28 pseudogene 7                                 | Other               |
| -6.019  | ENSG00000229054 | RPS29P14       | ribosomal protein S29 pseudogene 14                                | Other               |
| -6.49   | ENSG00000227032 | RPS2P36        | ribosomal protein S2 pseudogene 36                                 | Other               |
| -6.22   | ENSG00000243609 | RPS2P44        | ribosomal protein S2 pseudogene 44                                 | Other               |
| -5.758  | ENSG00000244378 | RPS2P45        | ribosomal protein S2 pseudogene 45                                 | Other               |
| -2.818  | ENSG00000240342 | RPS2P5         | ribosomal protein S2 pseudogene 5                                  | Other               |
| -6.147  | ENSG00000237818 | RPS3AP29       | ribosomal protein S3a pseudogene 29                                | Other               |
| -5.266  | ENSG00000242607 | RPS3AP34       | ribosomal protein S3a pseudogene 34                                | Other               |
| -6.404  | ENSG00000226318 | RPS3AP38       | ribosomal protein S3a pseudogene 38                                | Other               |
| -6.001  | ENSG00000231307 | RPS3P2         | ribosomal protein S3 pseudogene 2                                  | Other               |
| -4.834  | ENSG00000226948 | RPS4XP2        | ribosomal protein S4X pseudogene 2                                 | Other               |
| -5.996  | ENSG00000240616 | RPS6P25        | ribosomal protein S6 pseudogene 25                                 | Other               |
| -1.425  | ENSG00000170889 | RPS9           | ribosomal protein S9                                               | Cytoplasm           |
| -6.41   | ENSG00000235145 | RPSAP16        | ribosomal protein SA pseudogene 16                                 | Other               |
| -4.9    | ENSG00000226498 | RPSAP21        | ribosomal protein SA pseudogene 21                                 | Other               |
| -6.636  | ENSG00000233836 | RPSAP58        | ribosomal protein SA pseudogene 58                                 | Other               |
| -9.233  | ENSG00000007376 | RPUSD1         | RNA pseudouridine synthase domain containing 1                     | Other               |
| -8.735  | ENSG00000156990 | RPUSD3         | RNA pseudouridine synthase D3                                      | Other               |
| -9.268  | ENSG00000165526 | RPUSD4         | RNA pseudouridine synthase D4                                      | Cytoplasm           |
| -9.894  | ENSG00000103472 | RRN3P2         | RRN3 homolog, RNA polymerase I transcription factor pseudogene 2   | Other               |
| -7.504  | ENSG00000114767 | RRP9           | ribosomal RNA processing 9, U3 small nucleolar RNA binding protein | Nucleus             |
| -7.011  | ENSG00000254985 | RSF1-IT2       | RSF1 intronic transcript 2                                         | Other               |
| -6.031  | ENSG00000167524 | RSKR           | ribosomal protein S6 kinase related                                | Other               |
| -6.694  | ENSG00000258366 | RTEL1          | regulator of telomere elongation helicase 1                        | Nucleus             |
| -6.484  | ENSG0000026036  | RTEL1-TNFRSF6B | RTEL1-TNFRSF6B readthrough (NMD candidate)                         | Other               |
| -7.204  | ENSG00000251441 | RTEL1P1        | regulator of telomere elongation helicase 1 pseudogene 1           | Other               |
| -8.041  | ENSG00000130347 | RTN4IP1        | reticulon 4 interacting protein 1                                  | Cytoplasm           |
| -6.115  | ENSG00000040608 | RTN4R          | reticulon 4 receptor                                               | Plasma Membrane     |
| -5.949  | ENSG00000186907 | RTN4RL2        | reticulon 4 receptor like 2                                        | Plasma Membrane     |
| -6.692  | ENSG00000102445 | RUBCNL         | rubicon like autophagy enhancer                                    | Other               |
| -7.767  | ENSG00000188282 | RUFY4          | RUN and FYVE domain containing 4                                   | Other               |
| -6.632  | ENSG00000267750 | RUNDC3A-AS1    | RUNDC3A antisense RNA 1                                            | Other               |
| -10.582 | ENSG00000124813 | RUNX2          | runt related transcription factor 2                                | Nucleus             |
| -12.959 | ENSG0000020633  | RUNX3          | runt related transcription factor 3                                | Nucleus             |
| -7.661  | ENSG00000225855 | RUSC1-AS1      | RUSC1 antisense RNA 1                                              | Other               |
| -6.925  | ENSG00000156253 | RWD domain     | RWD domain containing 2B                                           | Other               |
| -7.312  | ENSG00000122481 | RWDD3          | RWD domain containing 3                                            | Other               |
| -9.102  | ENSG00000182552 | RWDD4          | RWD domain containing 4                                            | Other               |
| -3.588  | ENSG00000186350 | RXRA           | retinoid X receptor alpha                                          | Nucleus             |

|         |                 |                 |                                                                                 |                     |
|---------|-----------------|-----------------|---------------------------------------------------------------------------------|---------------------|
| -8.039  | ENSG00000196218 | RYR1            | ryanodine receptor 1                                                            | Cytoplasm           |
| -13.718 | ENSG00000163221 | S100A12         | S100 calcium binding protein A12                                                | Cytoplasm           |
| -12.261 | ENSG00000196154 | S100A4          | S100 calcium binding protein A4                                                 | Cytoplasm           |
| -5.55   | ENSG00000197956 | S100A6          | S100 calcium binding protein A6                                                 | Cytoplasm           |
| -16.237 | ENSG00000143546 | S100A8          | S100 calcium binding protein A8                                                 | Cytoplasm           |
| -16.39  | ENSG00000163220 | S100A9          | S100 calcium binding protein A9                                                 | Cytoplasm           |
| -5.568  | ENSG00000160307 | S100B           | S100 calcium binding protein B                                                  | Cytoplasm           |
| -10.271 | ENSG00000116497 | S100PBP         | S100P binding protein                                                           | Nucleus             |
| -8.561  | ENSG00000171643 | S100Z           | S100 calcium binding protein Z                                                  | Other               |
| -10.548 | ENSG00000170989 | S1PR1           | sphingosine-1-phosphate receptor 1                                              | Plasma Membrane     |
| -5.84   | ENSG00000267534 | S1PR2           | sphingosine-1-phosphate receptor 2                                              | Plasma Membrane     |
| -10.43  | ENSG00000125910 | S1PR4           | sphingosine-1-phosphate receptor 4                                              | Plasma Membrane     |
| -11.006 | ENSG00000180739 | S1PR5           | sphingosine-1-phosphate receptor 5                                              | Plasma Membrane     |
| -7.531  | ENSG00000130590 | SAMD10          | sterile alpha motif domain containing 10                                        | Other               |
| -11.251 | ENSG00000164483 | SAMD3           | sterile alpha motif domain containing 3                                         | Other               |
| -12.745 | ENSG00000177409 | SAMD9L          | sterile alpha motif domain containing 9 like                                    | Extracellular Space |
| -14.788 | ENSG00000101347 | SAMHD1          | SAM and HD domain containing deoxynucleoside triphosphate triphosphohydrolase 1 | Nucleus             |
| -12.033 | ENSG00000155307 | SAMSN1          | SAM domain, SH3 domain and nuclear localization signals 1                       | Nucleus             |
| -5.241  | ENSG00000136715 | SAP130          | Sin3A associated protein 130                                                    | Nucleus             |
| -7.278  | ENSG00000205323 | SARNP           | SAP domain containing ribonucleoprotein                                         | Nucleus             |
| -12.639 | ENSG00000122122 | SASH3           | SAM and SH3 domain containing 3                                                 | Cytoplasm           |
| -8.512  | ENSG00000156876 | SASS6           | SAS-6 centriolar assembly protein                                               | Cytoplasm           |
| -7.781  | ENSG00000228956 | SATB1-AS1       | SATB1 antisense RNA 1                                                           | Other               |
| -6.454  | ENSG00000246273 | SBF2-AS1        | SBF2 antisense RNA 1                                                            | Other               |
| -7.435  | ENSG00000245556 | SCAMP1-AS1      | SCAMP1 antisense RNA 1                                                          | Other               |
| -7.142  | ENSG00000244486 | SCARF2          | scavenger receptor class F member 2                                             | Plasma Membrane     |
| -5.475  | ENSG00000236345 | SCAT8           | chondroitin sulfate proteoglycan 4 pseudogene 3 Y-linked                        | Other               |
| -7.102  | ENSG00000145284 | SCD5            | stearoyl-CoA desaturase 5                                                       | Cytoplasm           |
| -5.91   | ENSG00000188076 | SCGB1C1/SCGB1C2 | secretoglobulin family 1C member 1                                              | Other               |
| -11.657 | ENSG00000161929 | SCIMP           | SLP adaptor and CSK interacting membrane protein                                | Plasma Membrane     |
| -4.76   | ENSG00000102098 | SCML2           | Scm polycomb group protein like 2                                               | Nucleus             |
| -9.814  | ENSG00000146285 | SCML4           | Scm polycomb group protein like 4                                               | Nucleus             |
| -6.746  | ENSG00000105711 | SCN1B           | sodium voltage-gated channel beta subunit 1                                     | Plasma Membrane     |
| -7.3    | ENSG00000183873 | SCN5A           | sodium voltage-gated channel alpha subunit 5                                    | Plasma Membrane     |
| -9.783  | ENSG00000130489 | SCO2            | SCO cytochrome c oxidase assembly protein 2                                     | Cytoplasm           |
| -12.174 | ENSG00000121064 | SCPEP1          | serine carboxypeptidase 1                                                       | Cytoplasm           |
| -8.748  | ENSG00000141295 | SCRN2           | secernin 2                                                                      | Extracellular Space |
| -5      | ENSG00000159307 | SCUBE1          | signal peptide, CUB domain and EGF like domain containing 1                     | Plasma Membrane     |
| -6.991  | ENSG00000228451 | SDAD1P1         | SDA1 domain containing 1 pseudogene 1                                           | Other               |
| -6.06   | ENSG00000125775 | SDCBP2          | syndecan binding protein 2                                                      | Cytoplasm           |
| -8.002  | ENSG00000128228 | SDF2L1          | stromal cell derived factor 2 like 1                                            | Cytoplasm           |
| -7.259  | ENSG00000196636 | SDHAF3          | succinate dehydrogenase complex assembly factor 3                               | Cytoplasm           |
| -6.449  | ENSG00000185986 | SDHAP3          | succinate dehydrogenase complex flavoprotein subunit A pseudogene 3             | Other               |
| -7.343  | ENSG00000069188 | SDK2            | sidekick cell adhesion molecule 2                                               | Plasma Membrane     |
| -7.236  | ENSG00000213693 | SEC14L1P1       | SEC14 like 1 pseudogene 1                                                       | Other               |
| -7.703  | ENSG00000133488 | SEC14L4         | SEC14 like lipid binding 4                                                      | Other               |
| -3.788  | ENSG00000075826 | SEC31B          | SEC31 homolog B, COPII coat complex component                                   | Cytoplasm           |
| -7.286  | ENSG00000198832 | SELENOM         | selenoprotein M                                                                 | Cytoplasm           |
| -6.357  | ENSG00000188404 | SELL            | selectin L                                                                      | Plasma Membrane     |
| -12.937 | ENSG00000110876 | SELPLG          | selectin P ligand                                                               | Plasma Membrane     |
| -5.922  | ENSG00000196189 | SEMA4A          | semaphorin 4A                                                                   | Plasma Membrane     |
| -7.252  | ENSG00000135622 | SEMA4F          | ssemaphorin 4F                                                                  | Plasma Membrane     |
| -6.808  | ENSG00000112902 | SEMA5A          | semaphorin 5A                                                                   | Plasma Membrane     |
| -6.772  | ENSG00000248445 | SEMA6A-AS1      | SEMA6A antisense RNA 1                                                          | Other               |
| -6.023  | ENSG00000167680 | SEMA6B          | semaphorin 6B                                                                   | Plasma Membrane     |
| -8.023  | ENSG00000138623 | SEMA7A          | semaphorin 7A (John Milton Hagen blood group)                                   | Plasma Membrane     |
| -7.914  | ENSG00000161956 | SENP3           | SUMO specific peptidase 3                                                       | Nucleus             |
| -8.343  | ENSG00000180096 | 1-Sep           | septin 1                                                                        | Cytoplasm           |
| -1.568  | ENSG00000184640 | 9-Sep           | septin 9                                                                        | Cytoplasm           |
| -14.926 | ENSG00000197249 | SERPINA1        | serpin family A member 1                                                        | Extracellular Space |
| -10.448 | ENSG00000242550 | SERPINB10       | serpin family B member 10                                                       | Cytoplasm           |
| -5.049  | ENSG00000197632 | SERPINB2        | serpin family B member 2                                                        | Extracellular Space |
| -8.654  | ENSG00000132386 | SERPINF1        | serpin family F member 1                                                        | Extracellular Space |
| -5.823  | ENSG00000114204 | SERPINI2        | serpin family I member 2                                                        | Extracellular Space |
| -8.444  | ENSG00000130766 | SESN2           | sestrin 2                                                                       | Cytoplasm           |
| -8.34   | ENSG00000103037 | SETD6           | SET domain containing 6, protein lysine methyltransferase                       | Nucleus             |
| -7.11   | ENSG00000155542 | SETD9           | SET domain containing 9                                                         | Nucleus             |
| -10.189 | ENSG00000136169 | SETD8           | SET domain bifurcated histone lysine methyltransferase 2                        | Nucleus             |
| -7.415  | ENSG00000170364 | SETMAR          | SET domain and mariner transposase fusion gene                                  | Nucleus             |
| -1.337  | ENSG00000107290 | SETX            | senataxin                                                                       | Nucleus             |
| -6.061  | ENSG00000100095 | SEZ6L           | seizure related 6 homolog like                                                  | Plasma Membrane     |
| -7.717  | ENSG00000156384 | SFR1            | SWI5 dependent homologous recombination repair protein 1                        | Nucleus             |
| -5.628  | ENSG00000227541 | SFR1P1          | SFR1 pseudogene 1                                                               | Other               |
| -8.184  | ENSG00000145423 | SFRP2           | secreted frizzled related protein 2                                             | Plasma Membrane     |
| -3.24   | ENSG00000213064 | SFT2D2          | SFT2 domain containing 2                                                        | Cytoplasm           |
| -8.692  | ENSG00000173349 | SFT2D3          | SFT2 domain containing 3                                                        | Other               |
| -8.131  | ENSG00000118473 | SGIP1           | SH3 domain GRB2 like endophilin interacting protein 1                           | Cytoplasm           |
| -10.993 | ENSG00000181523 | SGSH            | N-sulfoglucosamine sulfohydrolase                                               | Cytoplasm           |
| -7.789  | ENSG00000167037 | SGSM1           | small G protein signaling modulator 1                                           | Nucleus             |
| -8.238  | ENSG00000160999 | SH2B2           | SH2B adaptor protein 2                                                          | Cytoplasm           |
| -9.097  | ENSG00000198574 | SH2D1B          | SH2 domain containing 1B                                                        | Cytoplasm           |
| -4.645  | ENSG00000027869 | SH2D2A          | SH2 domain containing 2A                                                        | Cytoplasm           |
| -11.512 | ENSG00000095370 | SH2D3C          | SH2 domain containing 3C                                                        | Cytoplasm           |
| -7.176  | ENSG00000266777 | SH3GLP1         | SH3 domain containing GRB2 like 1, endophilin A2 pseudogene 1                   | Other               |
| -5.521  | ENSG00000147010 | SH3KBP1         | SH3 domain containing kinase binding protein 1                                  | Cytoplasm           |
| -8.103  | ENSG00000172985 | SH3RF3          | SH3 domain containing ring finger 3                                             | Other               |
| -6.036  | ENSG00000138606 | SHF             | Src homology 2 domain containing F                                              | Other               |
| -7.405  | ENSG00000187902 | SHISA7          | shisa family member 7                                                           | Plasma Membrane     |
| -8.702  | ENSG00000182183 | SHISAL2A        | shisa like 2A                                                                   | Other               |
| -12.548 | ENSG00000160410 | SHKBP1          | SH3KBP1 binding protein 1                                                       | Other               |
| -7.521  | ENSG00000171984 | SHLD1           | shieldin complex subunit 1                                                      | Nucleus             |

|         |                 |             |                                                           |                     |
|---------|-----------------|-------------|-----------------------------------------------------------|---------------------|
| -5.489  | ENSG00000197417 | SHPK        | sedoheptulokinase                                         | Cytoplasm           |
| -4.774  | ENSG00000185187 | SIGIRR      | single Ig and TIR domain containing                       | Plasma Membrane     |
| -9.775  | ENSG00000088827 | SIGLEC1     | sialic acid binding Ig like lectin 1                      | Plasma Membrane     |
| -10.242 | ENSG00000142512 | SIGLEC10    | sialic acid binding Ig like lectin 10                     | Plasma Membrane     |
| -10.481 | ENSG00000254415 | SIGLEC14    | sialic acid binding Ig like lectin 14                     | Plasma Membrane     |
| -7.482  | ENSG00000197046 | SIGLEC15    | sialic acid binding Ig like lectin 15                     | Plasma Membrane     |
| -7.657  | ENSG00000161643 | SIGLEC16    | sialic acid binding Ig like lectin 16 (gene/pseudogene)   | Plasma Membrane     |
| -7.135  | ENSG00000171101 | SIGLEC17P   | sialic acid binding Ig like lectin 17, pseudogene         | Other               |
| -5.387  | ENSG00000268581 | SIGLEC18P   | sialic acid binding Ig like lectin 18, pseudogene         | Other               |
| -8.675  | ENSG00000268849 | SIGLEC22P   | sialic acid binding Ig like lectin 22, pseudogene         | Other               |
| -8.238  | ENSG00000105501 | SIGLEC5     | sialic acid binding Ig like lectin 5                      | Plasma Membrane     |
| -9.394  | ENSG00000168995 | SIGLEC7     | sialic acid binding Ig like lectin 7                      | Plasma Membrane     |
| -10.655 | ENSG00000129450 | SIGLEC9     | sialic acid binding Ig like lectin 9                      | Plasma Membrane     |
| -6.607  | ENSG00000213445 | SIPA1       | signal-induced proliferation-associated 1                 | Cytoplasm           |
| -7.432  | ENSG00000198053 | SIRPA       | signal regulatory protein alpha                           | Plasma Membrane     |
| -6.414  | ENSG00000225774 | SIRPAP1     | signal regulatory protein alpha pseudogene 1              | Other               |
| -12.426 | ENSG00000101307 | SIRPB1      | signal regulatory protein beta 1                          | Plasma Membrane     |
| -11.459 | ENSG00000196209 | SIRPB2      | signal regulatory protein beta 2                          | Other               |
| -7.205  | ENSG00000125900 | SIRPD       | signal regulatory protein delta                           | Other               |
| -6.716  | ENSG00000089012 | SIRPG       | signal regulatory protein gamma                           | Plasma Membrane     |
| -5.979  | ENSG00000142082 | SIRT3       | sirtuin 3                                                 | Cytoplasm           |
| -9.435  | ENSG00000124523 | SIRT5       | sirtuin 5                                                 | Cytoplasm           |
| -7.881  | ENSG00000077463 | SIRT6       | sirtuin 6                                                 | Nucleus             |
| -7.116  | ENSG00000137078 | SIT1        | signaling threshold regulating transmembrane adaptor 1    | Plasma Membrane     |
| -10.686 | ENSG00000141293 | SKAP1       | src kinase associated phosphoprotein 1                    | Cytoplasm           |
| -7.565  | ENSG00000188779 | SKOR1       | SKI family transcriptional corepressor 1                  | Nucleus             |
| -8.924  | ENSG00000117090 | SLAMF1      | signaling lymphocytic activation molecule family member 1 | Plasma Membrane     |
| -10.606 | ENSG00000162739 | SLAMF6      | SLAM family member 6                                      | Plasma Membrane     |
| -11.172 | ENSG00000026751 | SLAMF7      | SLAM family member 7                                      | Plasma Membrane     |
| -7.037  | ENSG00000158714 | SLAMF8      | SLAM family member 8                                      | Extracellular Space |
| -13.581 | ENSG00000018280 | SLC11A1     | solute carrier family 11 member 1                         | Plasma Membrane     |
| -7.012  | ENSG00000204044 | SLC12A5-AS1 | chondroitin sulfate proteoglycan 4 pseudogene 3 Y-linked  | Other               |
| -5.557  | ENSG00000140199 | SLC12A6     | solute carrier family 12 member 6                         | Plasma Membrane     |
| -10.847 | ENSG00000110446 | SLC15A3     | solute carrier family 15 member 3                         | Cytoplasm           |
| -6.757  | ENSG00000174327 | SLC16A13    | solute carrier family 16 member 13                        | Cytoplasm           |
| -3.807  | ENSG00000141526 | SLC16A3     | solute carrier family 16 member 3                         | Plasma Membrane     |
| -9.473  | ENSG00000170190 | SLC16A5     | solute carrier family 16 member 5                         | Plasma Membrane     |
| -8.044  | ENSG00000101194 | SLC17A9     | solute carrier family 17 member 9                         | Cytoplasm           |
| -9.334  | ENSG00000146409 | SLC18B1     | solute carrier family 18 member B1                        | Other               |
| -5.782  | ENSG00000079215 | SLC1A3      | solute carrier family 1 member 3                          | Plasma Membrane     |
| -6.578  | ENSG00000175003 | SLC22A1     | solute carrier family 22 member 1                         | Plasma Membrane     |
| -8.173  | ENSG00000004809 | SLC22A16    | solute carrier family 22 member 16                        | Plasma Membrane     |
| -8.286  | ENSG00000110628 | SLC22A18    | solute carrier family 22 member 18                        | Plasma Membrane     |
| -10.052 | ENSG00000197208 | SLC22A4     | solute carrier family 22 member 4                         | Plasma Membrane     |
| -11.685 | ENSG00000140090 | SLC24A4     | solute carrier family 24 member 4                         | Plasma Membrane     |
| -7.421  | ENSG00000102078 | SLC25A14    | solute carrier family 25 member 14                        | Cytoplasm           |
| -7.185  | ENSG00000125454 | SLC25A19    | solute carrier family 25 member 19                        | Cytoplasm           |
| -9.596  | ENSG00000178537 | SLC25A20    | solute carrier family 25 member 20                        | Cytoplasm           |
| -5.16   | ENSG00000162461 | SLC25A34    | solute carrier family 25 member 34                        | Cytoplasm           |
| -3.112  | ENSG00000133006 | SLC25A39    | solute carrier family 25 member 39                        | Cytoplasm           |
| -10.4   | ENSG00000075303 | SLC25A40    | solute carrier family 25 member 40                        | Cytoplasm           |
| -8.359  | ENSG00000181035 | SLC25A42    | solute carrier family 25 member 42                        | Cytoplasm           |
| -9.312  | ENSG00000162241 | SLC25A45    | solute carrier family 25 member 45                        | Cytoplasm           |
| -8.916  | ENSG00000122696 | SLC25A51    | solute carrier family 25 member 51                        | Cytoplasm           |
| -7.604  | ENSG00000112053 | SLC26A8     | solute carrier family 26 member 8                         | Plasma Membrane     |
| -10.305 | ENSG00000130304 | SLC27A1     | solute carrier family 27 member 1                         | Plasma Membrane     |
| -6.748  | ENSG00000083807 | SLC27A5     | solute carrier family 27 member 5                         | Cytoplasm           |
| -8.043  | ENSG00000197506 | SLC28A3     | solute carrier family 28 member 3                         | Plasma Membrane     |
| -8.827  | ENSG00000198246 | SLC29A3     | solute carrier family 29 member 3                         | Plasma Membrane     |
| -5.665  | ENSG00000227533 | SLC2A1-AS1  | SLC2A1 antisense RNA 1                                    | Other               |
| -8.675  | ENSG00000151229 | SLC2A13     | solute carrier family 2 member 13                         | Plasma Membrane     |
| -5.191  | ENSG00000173262 | SLC2A14     | solute carrier family 2 member 14                         | Nucleus             |
| -9.806  | ENSG00000142583 | SLC2A5      | solute carrier family 2 member 5                          | Plasma Membrane     |
| -10.336 | ENSG00000160326 | SLC2A6      | solute carrier family 2 member 6                          | Plasma Membrane     |
| -4.602  | ENSG00000152683 | SLC30A6     | solute carrier family 30 member 6                         | Cytoplasm           |
| -10.43  | ENSG00000136868 | SLC31A1     | solute carrier family 31 member 1                         | Plasma Membrane     |
| -10.184 | ENSG00000169359 | SLC33A1     | solute carrier family 33 member 1                         | Cytoplasm           |
| -8.104  | ENSG00000164414 | SLC35A1     | solute carrier family 35 member A1                        | Cytoplasm           |
| -5.448  | ENSG00000182747 | SLC35D3     | solute carrier family 35 member D3                        | Cytoplasm           |
| -7.194  | ENSG00000215790 | SLC35E2A    | solute carrier family 35 member E2A                       | Other               |
| -7.049  | ENSG00000100036 | SLC35E4     | solute carrier family 35 member E4                        | Other               |
| -5.033  | ENSG00000183780 | SLC35F3     | solute carrier family 35 member F3                        | Other               |
| -4.742  | ENSG00000134955 | SLC37A2     | solute carrier family 37 member 2                         | Cytoplasm           |
| -5.603  | ENSG00000169507 | SLC38A11    | solute carrier family 38 member 11                        | Other               |
| -9.686  | ENSG00000177058 | SLC38A9     | solute carrier family 38 member 9                         | Extracellular Space |
| -10.194 | ENSG00000133195 | SLC39A11    | solute carrier family 39 member 11                        | Other               |
| -9.185  | ENSG00000134802 | SLC43A3     | solute carrier family 43 member 3                         | Extracellular Space |
| -9.238  | ENSG00000119457 | SLC46A2     | solute carrier family 46 member 2                         | Plasma Membrane     |
| -5.261  | ENSG00000142494 | SLC47A1     | solute carrier family 47 member 1                         | Plasma Membrane     |
| -8.465  | ENSG00000169026 | SLC49A3     | solute carrier family 49 member 3                         | Other               |
| -6.026  | ENSG00000144290 | SLC4A10     | solute carrier family 4 member 10                         | Plasma Membrane     |
| -6.435  | ENSG00000188687 | SLC4A5      | solute carrier family 4 member 5                          | Plasma Membrane     |
| -6.262  | ENSG00000163959 | SLC51A      | solute carrier family 51 alpha subunit                    | Plasma Membrane     |
| -6.461  | ENSG00000154025 | SLC5A10     | solute carrier family 5 member 10                         | Cytoplasm           |
| -6.059  | ENSG00000140675 | SLC5A2      | solute carrier family 5 member 2                          | Plasma Membrane     |
| -8.021  | ENSG00000111181 | SLC6A12     | solute carrier family 6 member 12                         | Plasma Membrane     |
| -8.502  | ENSG00000063127 | SLC6A16     | solute carrier family 6 member 16                         | Plasma Membrane     |
| -12.596 | ENSG00000155465 | SLC7A7      | solute carrier family 7 member 7                          | Plasma Membrane     |
| -12.501 | ENSG00000183023 | SLC8A1      | solute carrier family 8 member A1                         | Plasma Membrane     |
| -5.514  | ENSG00000135740 | SLC9A5      | solute carrier family 9 member A5                         | Plasma Membrane     |
| -9.055  | ENSG00000227825 | SLC9A7P1    | solute carrier family 9 member 7 pseudogene 1             | Other               |

|         |                 |               |                                                                                                                |                     |
|---------|-----------------|---------------|----------------------------------------------------------------------------------------------------------------|---------------------|
| -10.934 | ENSG00000173930 | SLCO4C1       | solute carrier organic anion transporter family member 4C1                                                     | Plasma Membrane     |
| -11.776 | ENSG00000172716 | SLFN11        | schlafen family member 11                                                                                      | Nucleus             |
| -10.963 | ENSG00000205045 | SLFN12L       | schlafen family member 12 like                                                                                 | Other               |
| -10.782 | ENSG00000154760 | SLFN13        | schlafen family member 13                                                                                      | Nucleus             |
| -13.19  | ENSG00000166750 | SLFN5         | schlafen family member 5                                                                                       | Nucleus             |
| -8.758  | ENSG00000179542 | SLITRK4       | SLIT and NTRK like family member 4                                                                             | Extracellular Space |
| -9.51   | ENSG00000124107 | SLPI          | secretory leukocyte peptidase inhibitor                                                                        | Cytoplasm           |
| -8.07   | ENSG00000149346 | SLX4IP        | SLX4 interacting protein                                                                                       | Other               |
| -7.118  | ENSG00000170545 | SMAGP         | small cell adhesion glycoprotein                                                                               | Cytoplasm           |
| -2.907  | ENSG00000084070 | SMAP2         | small ArfGAP2                                                                                                  | Cytoplasm           |
| -5.667  | ENSG00000082014 | SMARCD3       | SWI/SNF related, matrix associated, actin dependent regulator of chromatin, subfamily d, member 3              | Nucleus             |
| -5.993  | ENSG00000225215 | SMARCE1P1     | SWI/SNF related, matrix associated, actin dependent regulator of chromatin, subfamily e, member 1 pseudogene 1 | Other               |
| -7.07   | ENSG00000254634 | SMG1P6        | SMG1 pseudogene 6                                                                                              | Other               |
| -7.341  | ENSG00000184785 | SMIM10        | small integral membrane protein 10                                                                             | Other               |
| -8.652  | ENSG00000224531 | SMIM13        | small integral membrane protein 13                                                                             | Other               |
| -10.515 | ENSG00000224397 | SMIM25        | small integral membrane protein 25                                                                             | Other               |
| -7.401  | ENSG00000232388 | SMIM26        | small integral membrane protein 26                                                                             | Other               |
| -7.062  | ENSG00000235453 | SMIM27        | small integral membrane protein 27                                                                             | Other               |
| -7.771  | ENSG00000186577 | SMIM29        | small integral membrane protein 29                                                                             | Other               |
| -7.958  | ENSG00000111850 | SMIM8         | small integral membrane protein 8                                                                              | Other               |
| -6.351  | ENSG00000172062 | SMN1/SMN2     | survival of motor neuron 1, telomeric                                                                          | Nucleus             |
| -5.392  | ENSG00000103056 | SMPD3         | sphingomyelin phosphodiesterase 3                                                                              | Cytoplasm           |
| -8.147  | ENSG00000185669 | SNAI3         | snail family transcriptional repressor 3                                                                       | Nucleus             |
| -7.025  | ENSG00000260630 | SNAI3-AS1     | SNAI3 antisense RNA 1                                                                                          | Other               |
| -6.183  | ENSG00000247092 | SNHG10        | small nucleolar RNA host gene 10                                                                               | Other               |
| -6.06   | ENSG00000267322 | SNHG22        | small nucleolar RNA host gene 22                                                                               | Other               |
| -5.696  | ENSG00000200075 | SNORA25       | chondroitin sulfate proteoglycan 4 pseudogene 3 Y-linked                                                       | Other               |
| -5.767  | ENSG00000252050 | SNORA31       | chondroitin sulfate proteoglycan 4 pseudogene 3 Y-linked                                                       | Other               |
| -5.758  | ENSG00000207008 | SNORA54       | small nucleolar RNA, H/ACA box 54                                                                              | Other               |
| -5.989  | ENSG00000212567 | SNORA57       | chondroitin sulfate proteoglycan 4 pseudogene 3 Y-linked                                                       | Other               |
| -5.487  | ENSG00000238317 | SNORD11       | small nucleolar RNA, C/D box 11                                                                                | Other               |
| -6.019  | ENSG00000231587 | SNORD62B      | small nucleolar RNA, C/D box 62B                                                                               | Other               |
| -5.592  | ENSG00000201592 | snoU2_19      | chondroitin sulfate proteoglycan 4 pseudogene 3 Y-linked                                                       | Other               |
| -1.845  | ENSG00000163788 | SNRK          | SNF related kinase                                                                                             | Cytoplasm           |
| -6.086  | ENSG00000234617 | SNRK-AS1      | SNRK antisense RNA 1                                                                                           | Other               |
| -9.591  | ENSG00000182004 | SNRPE         | small nuclear ribonucleoprotein polypeptide E                                                                  | Nucleus             |
| -4.772  | ENSG00000233270 | SNRPEP4       | small nuclear ribonucleoprotein polypeptide E pseudogene 4                                                     | Other               |
| -4.903  | ENSG00000235363 | SNRPGP10      | small nuclear ribonucleoprotein polypeptide G pseudogene 10                                                    | Other               |
| -6.574  | ENSG00000169371 | SNUPN         | snurportin 1                                                                                                   | Nucleus             |
| -2.355  | ENSG00000071189 | SNX13         | sorting nexin 13                                                                                               | Cytoplasm           |
| -6.425  | ENSG00000110025 | SNX15         | sorting nexin 15                                                                                               | Cytoplasm           |
| -2.475  | ENSG00000178996 | SNX18         | sorting nexin 18                                                                                               | Cytoplasm           |
| -7.085  | ENSG00000225345 | SNX18P3       | sorting nexin 18 pseudogene 3                                                                                  | Other               |
| -11.577 | ENSG00000167208 | SNX20         | sorting nexin 20                                                                                               | Cytoplasm           |
| -7.145  | ENSG00000271699 | SNX29P2       | sorting nexin 29 pseudogene 2                                                                                  | Other               |
| -7.543  | ENSG00000198106 | SNX29P2       | sorting nexin 29 pseudogene 2                                                                                  | Other               |
| -6.87   | ENSG00000172803 | SNX32         | sorting nexin 32                                                                                               | Other               |
| -7.519  | ENSG00000184985 | SORCS2        | sortilin related VPS10 domain containing receptor 2                                                            | Plasma Membrane     |
| -4.367  | ENSG00000137642 | SORL1         | sortilin related receptor 1                                                                                    | Cytoplasm           |
| -8.17   | ENSG00000187808 | SOWAHD        | so sondawah ankyrin repeat domain family member D                                                              | Other               |
| -2.857  | ENSG00000067066 | SP100         | SP100 nuclear antigen                                                                                          | Nucleus             |
| -11.198 | ENSG00000079263 | SP140         | SP140 nuclear body protein                                                                                     | Nucleus             |
| -1.767  | ENSG00000172845 | SP3           | Sp3 transcription factor                                                                                       | Nucleus             |
| -5.004  | ENSG00000105866 | SP4           | Sp4 transcription factor                                                                                       | Nucleus             |
| -6.617  | ENSG00000064199 | SPA17         | sperm autoantigenic protein 17                                                                                 | Plasma Membrane     |
| -6.682  | ENSG00000182310 | SPACA6        | sperm acrosome associated 6                                                                                    | Other               |
| -6.333  | ENSG00000165698 | SPACA9        | sperm acrosome associated 9                                                                                    | Cytoplasm           |
| -5.172  | ENSG00000137098 | SPAG8         | sperm associated antigen 8                                                                                     | Cytoplasm           |
| -6.004  | ENSG00000122432 | SPATA1        | spermatogenesis associated 1                                                                                   | Other               |
| -8.169  | ENSG00000158792 | SPATA2L       | spermatogenesis associated 2 like                                                                              | Other               |
| -8.877  | ENSG00000171763 | SPATA5L1      | spermatogenesis associated 5 like 1                                                                            | Other               |
| -9.336  | ENSG00000132122 | SPATA6        | spermatogenesis associated 6                                                                                   | Cytoplasm           |
| -7.355  | ENSG00000042317 | SPATA7        | spermatogenesis associated 7                                                                                   | Cytoplasm           |
| -7.858  | ENSG00000186583 | SPATC1        | spermatogenesis and centriole associated 1                                                                     | Cytoplasm           |
| -6.497  | ENSG00000160284 | SPATC1L       | spermatogenesis and centriole associated 1 like                                                                | Other               |
| -2.44   | ENSG00000129128 | SPCS3         | signal peptidase complex subunit 3                                                                             | Cytoplasm           |
| -7.607  | ENSG00000152582 | SPEF2         | sperm flagellar 2                                                                                              | Cytoplasm           |
| -8.547  | ENSG00000063176 | SPHK2         | sphingosine kinase 2                                                                                           | Cytoplasm           |
| -14.101 | ENSG00000066336 | SP1           | Spi-1 proto-oncogene                                                                                           | Nucleus             |
| -6.447  | ENSG00000269404 | SP1B          | Spi-B transcription factor                                                                                     | Nucleus             |
| -5.488  | ENSG00000186787 | SPIN2A/SPIN2B | spindlin family member 2A                                                                                      | Other               |
| -6.274  | ENSG00000197471 | SPN           | sialophorin                                                                                                    | Plasma Membrane     |
| -6.216  | ENSG00000169682 | SPNS1         | sphingolipid transporter 1 (putative)                                                                          | Cytoplasm           |
| -6.663  | ENSG00000183018 | SPNS2         | sphingolipid transporter 2                                                                                     | Other               |
| -6.127  | ENSG00000182557 | SPNS3         | sphingolipid transporter 3 (putative)                                                                          | Other               |
| -13.155 | ENSG00000107742 | SPOCK2        | SPARC (osteonectin), cwcv and kazal like domains proteoglycan 2                                                | Extracellular Space |
| -1.968  | ENSG00000144228 | SPOPL         | speckle type BTB/POZ protein like                                                                              | Other               |
| -10.184 | ENSG00000005206 | SPPL2B        | signal peptide peptidase like 2B                                                                               | Plasma Membrane     |
| -7.705  | ENSG00000168939 | SPRY3         | sprouty RTK signaling antagonist 3                                                                             | Plasma Membrane     |
| -7.768  | ENSG00000111671 | SPSB2         | splA/ryanodine receptor domain and SOCS box containing 2                                                       | Cytoplasm           |
| -9.743  | ENSG00000137767 | SQOR          | sulfide quinone oxidoreductase                                                                                 | Cytoplasm           |
| -6.985  | ENSG00000196220 | SRGAP3        | SLIT-ROBO Rho GTPase activating protein 3                                                                      | Cytoplasm           |
| -6.492  | ENSG00000248508 | SRP14-AS1     | SRP14 antisense RNA1 (head to head)                                                                            | Other               |
| -8.296  | ENSG00000153037 | SRP19         | signal recognition particle 19                                                                                 | Cytoplasm           |
| -6.314  | ENSG00000226763 | SRRM5         | serine/arginine repetitive matrix 5                                                                            | Other               |
| -2.562  | ENSG00000141298 | SSH2          | slingshot protein phosphatase 2                                                                                | Cytoplasm           |
| -4.887  | ENSG00000260233 | SSSCA1-AS1    | SSSCA1 antisense RNA 1 (head to head)                                                                          | Other               |
| -5.807  | ENSG00000180953 | ST20          | suppressor of tumorigenicity 20                                                                                | Other               |
| -7.048  | ENSG00000157350 | ST3GAL2       | ST3 beta-galactoside alpha-2,3-sialyltransferase 2                                                             | Cytoplasm           |
| -7.848  | ENSG00000070731 | ST6GALNAC2    | ST6 N-acetylgalactosaminide alpha-2,6-sialyltransferase 2                                                      | Cytoplasm           |
| -8.818  | ENSG00000184005 | ST6GALNAC3    | ST6 N-acetylgalactosaminide alpha-2,6-sialyltransferase 3                                                      | Cytoplasm           |

|         |                 |                 |                                                                        |                     |
|---------|-----------------|-----------------|------------------------------------------------------------------------|---------------------|
| -6.766  | ENSG00000111728 | ST8SIA1         | ST8 alpha-N-acetyl-neuraminide alpha-2,8-sialyltransferase 1           | Cytoplasm           |
| -7.087  | ENSG00000035720 | STAP1           | signal transducing adaptor family member 1                             | Cytoplasm           |
| -7.83   | ENSG00000172345 | STAR5           | STAR related lipid transfer domain containing 5                        | Cytoplasm           |
| -9.702  | ENSG00000159433 | STAR9           | STAR related lipid transfer domain containing 9                        | Cytoplasm           |
| -2.218  | ENSG00000170581 | STAT2           | signal transducer and activator of transcription 2                     | Nucleus             |
| -11.296 | ENSG00000138378 | STAT4           | signal transducer and activator of transcription 4                     | Nucleus             |
| -2.235  | ENSG00000166888 | STAT6           | signal transducer and activator of transcription 6                     | Nucleus             |
| -6.203  | ENSG00000213533 | STIMATE         | STIM activating enhancer                                               | Cytoplasm           |
| -5.506  | ENSG00000072786 | STK10           | serine/threonine kinase 10                                             | Cytoplasm           |
| -7.203  | ENSG00000152953 | STK32B          | serine/threonine kinase 32B                                            | Other               |
| -6.215  | ENSG00000130413 | STK33           | serine/threonine kinase 33                                             | Cytoplasm           |
| -5.986  | ENSG00000067221 | STOML1          | stomatin like 1                                                        | Other               |
| -7.748  | ENSG00000173320 | STOX2           | storkhead box 2                                                        | Other               |
| -9.17   | ENSG00000266173 | STRADA          | STE20 related adaptor alpha                                            | Nucleus             |
| -6.402  | ENSG00000166763 | STRCP1          | stereocilin pseudogene 1                                               | Other               |
| -3.578  | ENSG00000104915 | STX10           | syntaxin 10                                                            | Cytoplasm           |
| -8.042  | ENSG00000254995 | STX16-NPEPL1    | STX16-NPEPL1 readthrough (NMD candidate)                               | Other               |
| -6.654  | ENSG00000247708 | STX18-AS1       | STX18 antisense RNA 1 (head to head)                                   | Other               |
| -3.659  | ENSG00000076944 | STXB2           | syntaxin binding protein 2                                             | Plasma Membrane     |
| -7.733  | ENSG00000166263 | STXB4           | syntaxin binding protein 4                                             | Cytoplasm           |
| -4.726  | ENSG00000163541 | SUCLG1          | succinate-CoA ligase alpha subunit                                     | Cytoplasm           |
| -6.012  | ENSG00000239827 | SUGT1P3         | SUGT1 pseudogene 3                                                     | Other               |
| -6.105  | ENSG00000254876 | SUGT1P4-STRA6LP | SUGT1P4-STRA6LP readthrough                                            | Other               |
| -10.237 | ENSG00000196502 | SULT1A1         | sulfotransferase family 1A member 1                                    | Cytoplasm           |
| -5.039  | ENSG00000197165 | SULT1A2         | sulfotransferase family 1A member 2                                    | Cytoplasm           |
| -11.034 | ENSG00000173597 | SULT1B1         | sulfotransferase family 1B member 1                                    | Cytoplasm           |
| -2.762  | ENSG00000100242 | SUN2            | Sad1 and UNC84 domain containing 2                                     | Nucleus             |
| -8.93   | ENSG00000139531 | SUOX            | sulfite oxidase                                                        | Cytoplasm           |
| -5.19   | ENSG00000256238 | SUPT16HP1       | SPT16 homolog, facilitates chromatin remodeling subunit pseudogene 1   | Other               |
| -11.3   | ENSG00000102710 | SUPT20H         | SPT20 homolog, SAGA complex component                                  | Nucleus             |
| -6.112  | ENSG00000099994 | SUSD2           | sushi domain containing 2                                              | Extracellular Space |
| -6.287  | ENSG00000143502 | SUSD4           | sushi domain containing 4                                              | Other               |
| -7.244  | ENSG00000173928 | SWAP1           | SWIM-type zinc finger 7 associated protein 1                           | Other               |
| -2.264  | ENSG00000125755 | SYMPK           | symplekin                                                              | Cytoplasm           |
| -6.558  | ENSG00000131018 | SYNE1           | spectrin repeat containing nuclear envelope protein 1                  | Nucleus             |
| -9.911  | ENSG00000204070 | SYS1            | SYS1 golgi trafficking protein                                         | Cytoplasm           |
| -10.241 | ENSG00000132718 | SYT11           | synaptotagmin 11                                                       | Cytoplasm           |
| -6.28   | ENSG00000142765 | SYTL1           | synaptotagmin like 1                                                   | Cytoplasm           |
| -11.062 | ENSG00000164674 | SYTL3           | synaptotagmin like 3                                                   | Cytoplasm           |
| -9.806  | ENSG00000100324 | TAB1            | TGF-beta activated kinase 1 (MAP3K7) binding protein 1                 | Cytoplasm           |
| -8.212  | ENSG00000152382 | TADA1           | transcriptional adaptor 1                                              | Nucleus             |
| -3.101  | ENSG00000103168 | TAF1C           | TATA-box binding protein associated factor, RNA polymerase I subunit C | Nucleus             |
| -8.671  | ENSG00000148835 | TAF5            | TATA-box binding protein associated factor 5                           | Nucleus             |
| -8.371  | ENSG00000198673 | TAF2            | TAF4 chemokine like family member 2                                    | Cytoplasm           |
| -12.434 | ENSG00000164691 | TAGAP           | T cell activation RhoGTPase activating protein                         | Cytoplasm           |
| -8.753  | ENSG00000144559 | TAMM41          | TAM41 mitochondrial translocator assembly and maintenance homolog      | Cytoplasm           |
| -10.663 | ENSG00000103047 | TANG6           | transport and golgi organization 6 homolog                             | Other               |
| -2.198  | ENSG00000168394 | TAP1            | transporter 1, ATP binding cassette subfamily B member                 | Cytoplasm           |
| -8.25   | ENSG00000263327 | TAPT1-AS1       | TAPT1 antisense RNA 1 (head to head)                                   | Other               |
| -7.279  | ENSG00000248385 | TARM1           | T cell-interacting, activating receptor on myeloid cells 1             | Plasma Membrane     |
| -5.83   | ENSG00000256682 | TAS2R12         | chondroitin sulfate proteoglycan 4 pseudogene 3 Y-linked               | Other               |
| -5.395  | ENSG00000212128 | TAS2R13         | taste 2 receptor member 13                                             | Plasma Membrane     |
| -6.219  | ENSG00000212127 | TAS2R14         | taste 2 receptor member 14                                             | Plasma Membrane     |
| -6.854  | ENSG00000256981 | TAS2R18         | chondroitin sulfate proteoglycan 4 pseudogene 3 Y-linked               | Other               |
| -6.25   | ENSG00000255837 | TAS2R20         | taste 2 receptor member 20                                             | Plasma Membrane     |
| -7.492  | ENSG00000256188 | TAS2R30         | taste 2 receptor member 30                                             | Plasma Membrane     |
| -6.572  | ENSG00000256436 | TAS2R31         | taste 2 receptor member 31                                             | Plasma Membrane     |
| -8.533  | ENSG00000089123 | TASP1           | taspase 1                                                              | Nucleus             |
| -8.487  | ENSG00000203705 | TATDN3          | TatD DNase domain containing 3                                         | Cytoplasm           |
| -4.972  | ENSG00000102125 | TAZ             | tafazzin                                                               | Nucleus             |
| -9.47   | ENSG00000099992 | TBC1D10A        | TBC1 domain family member 10A                                          | Plasma Membrane     |
| -11.669 | ENSG00000175463 | TBC1D10C        | TBC1 domain family member 10C                                          | Nucleus             |
| -11.08  | ENSG00000095383 | TBC1D2          | TBC1 domain family member 2                                            | Cytoplasm           |
| -7.556  | ENSG00000162065 | TBC1D24         | TBC1 domain family member 24                                           | Cytoplasm           |
| -11.953 | ENSG00000167202 | TBC1D2B         | TBC1 domain family member 2B                                           | Cytoplasm           |
| -7.526  | ENSG00000145979 | TBC1D7          | TBC1 domain family member 7                                            | Cytoplasm           |
| -7.055  | ENSG00000133138 | TBC1D8B         | TBC1 domain family member 8B                                           | Other               |
| -3.843  | ENSG00000124659 | TBCC            | tubulin folding cofactor C                                             | Cytoplasm           |
| -6.972  | ENSG00000143178 | TBX19           | T-box 19                                                               | Nucleus             |
| -11.224 | ENSG00000073861 | TBX21           | T-box 21                                                               | Nucleus             |
| -8      | ENSG00000170379 | TCAF2           | TRPM8 channel associated factor 2                                      | Plasma Membrane     |
| -6.161  | ENSG00000173991 | TCAP            | titin-cap                                                              | Cytoplasm           |
| -8.848  | ENSG00000137310 | TCF19           | transcription factor 19                                                | Nucleus             |
| -8.154  | ENSG00000236567 | TCF3P1          | transcription factor 3 pseudogene 1                                    | Other               |
| -12.256 | ENSG00000081059 | TCF7            | transcription factor 7                                                 | Nucleus             |
| -7.911  | ENSG00000100721 | TCL1A           | T cell leukemia/lymphoma 1A                                            | Nucleus             |
| -11.794 | ENSG00000134827 | TCN1            | transcobalamin 1                                                       | Cytoplasm           |
| -9.559  | ENSG00000185339 | TCN2            | transcobalamin 2                                                       | Extracellular Space |
| -6.077  | ENSG00000152760 | TCTEX1D1        | Tctex1 domain containing 1                                             | Other               |
| -7.243  | ENSG00000204852 | TCN1N           | tectonic family member 1                                               | Extracellular Space |
| -9.643  | ENSG00000156414 | TDRD9           | tudor domain containing 9                                              | Cytoplasm           |
| -8.274  | ENSG00000182134 | TDRKH           | tudor and KH domain containing                                         | Cytoplasm           |
| -6.241  | ENSG00000109927 | TECTA           | tectorin alpha                                                         | Extracellular Space |
| -7.795  | ENSG00000172171 | TEFM            | transcription elongation factor, mitochondrial                         | Cytoplasm           |
| -3.44   | ENSG00000129566 | TEP1            | telomerase associated protein 1                                        | Nucleus             |
| -10.621 | ENSG00000167302 | TEPSIN          | TEPSIN adaptor related protein complex 4 accessory protein             | Nucleus             |
| -9.573  | ENSG00000107140 | TESK1           | testis associated actin remodelling kinase 1                           | Nucleus             |
| -6.524  | ENSG00000151287 | TEX30           | testis expressed 30                                                    | Other               |
| -5.861  | ENSG00000198723 | TEX45           | testis expressed 45                                                    | Other               |
| -7.462  | ENSG00000151575 | TEX9            | testis expressed 9                                                     | Other               |
| -5.863  | ENSG00000116819 | TFAP2E          | transcription factor AP-2 epsilon                                      | Nucleus             |

|         |                 |             |                                                          |                     |
|---------|-----------------|-------------|----------------------------------------------------------|---------------------|
| -7.886  | ENSG00000029639 | TFB1M       | transcription factor B1, mitochondrial                   | Cytoplasm           |
| -5.48   | ENSG00000112561 | TFEB        | transcription factor EB                                  | Nucleus             |
| -11.248 | ENSG00000105967 | TFEC        | transcription factor EC                                  | Nucleus             |
| -6.014  | ENSG00000042832 | TG          | thyroglobulin                                            | Extracellular Space |
| -7.826  | ENSG00000088451 | TGDS        | TDP-glucose 4,6-dehydratase                              | Extracellular Space |
| -7.086  | ENSG00000163235 | TGFA        | transforming growth factor alpha                         | Extracellular Space |
| -5.766  | ENSG00000119699 | TGFB3       | transforming growth factor beta 3                        | Extracellular Space |
| -5.344  | ENSG00000120708 | TGFB1       | transforming growth factor beta induced                  | Extracellular Space |
| -11.676 | ENSG00000069702 | TGFBR3      | transforming growth factor beta receptor 3               | Plasma Membrane     |
| -9.473  | ENSG00000118707 | TGIF2       | TGFB induced factor homeobox 2                           | Nucleus             |
| -6.14   | ENSG00000092295 | TGM1        | transglutaminase 1                                       | Plasma Membrane     |
| -4.458  | ENSG00000198959 | TGM2        | transglutaminase 2                                       | Cytoplasm           |
| -6.343  | ENSG00000173451 | THAP2       | THAP domain containing 2                                 | Nucleus             |
| -5.713  | ENSG00000230513 | THAP7-AS1   | THAP7 antisense RNA 1                                    | Other               |
| -5.709  | ENSG00000161277 | THAP8       | THAP domain containing 8                                 | Other               |
| -8.184  | ENSG00000178726 | THBD        | thrombomodulin                                           | Plasma Membrane     |
| -7.002  | ENSG00000113296 | THBS4       | thrombospondin 4                                         | Extracellular Space |
| -8.593  | ENSG00000159445 | THEM4       | thioesterase superfamily member 4                        | Plasma Membrane     |
| -7.577  | ENSG00000196407 | THEM5       | thioesterase superfamily member 5                        | Cytoplasm           |
| -7.347  | ENSG00000130193 | THEM6       | thioesterase superfamily member 6                        | Other               |
| -10.59  | ENSG00000172673 | THEMIS      | thymocyte selection associated                           | Cytoplasm           |
| -7.56   | ENSG00000130775 | THEMIS2     | thymocyte selection associated family member 2           | Other               |
| -7.819  | ENSG00000051596 | THOC3       | THO complex 3                                            | Nucleus             |
| -7.709  | ENSG00000221995 | TIAF1       | TGFB1-induced anti-apoptotic factor 1                    | Cytoplasm           |
| -11.518 | ENSG00000156299 | TIAM1       | T cell lymphoma invasion and metastasis 1                | Cytoplasm           |
| -5.954  | ENSG00000243414 | TICAM2      | toll like receptor adaptor molecule 2                    | Plasma Membrane     |
| -9.156  | ENSG00000145365 | TIFA        | TRAF interacting protein with forkhead associated domain | Cytoplasm           |
| -7.228  | ENSG00000180346 | TIGD2       | tigger transposable element derived 2                    | Other               |
| -6.359  | ENSG00000173825 | TIGD3       | tigger transposable element derived 3                    | Other               |
| -6.836  | ENSG00000179886 | TIGD5       | tigger transposable element derived 5                    | Other               |
| -9.648  | ENSG00000181847 | TIGIT       | T cell immunoreceptor with Ig and ITIM domains           | Plasma Membrane     |
| -5.093  | ENSG00000145850 | TIMD4       | T cell immunoglobulin and mucin domain containing 4      | Plasma Membrane     |
| -7.411  | ENSG00000134809 | TIMM10      | translocase of inner mitochondrial membrane 10           | Cytoplasm           |
| -7.215  | ENSG00000126953 | TIMM8A      | translocase of inner mitochondrial membrane 8A           | Cytoplasm           |
| -7.815  | ENSG00000100575 | TIMM9       | translocase of inner mitochondrial membrane 9            | Cytoplasm           |
| -7.13   | ENSG00000243926 | TIPARP-AS1  | TIPARP antisense RNA 1                                   | Other               |
| -8.804  | ENSG00000150455 | TIRAP       | TIR domain containing adaptor protein                    | Cytoplasm           |
| -2.896  | ENSG00000163931 | TKT         | transketolase                                            | Cytoplasm           |
| -7.512  | ENSG00000007350 | TKTL1       | transketolase like 1                                     | Other               |
| -11.436 | ENSG00000174125 | TLR1        | toll like receptor 1                                     | Plasma Membrane     |
| -7.409  | ENSG00000174123 | TLR10       | toll like receptor 10                                    | Plasma Membrane     |
| -12.247 | ENSG00000137462 | TLR2        | toll like receptor 2                                     | Plasma Membrane     |
| -12.428 | ENSG00000136869 | TLR4        | toll like receptor 4                                     | Plasma Membrane     |
| -9.555  | ENSG00000187554 | TLR5        | toll like receptor 5                                     | Plasma Membrane     |
| -9.985  | ENSG00000174130 | TLR6        | toll like receptor 6                                     | Plasma Membrane     |
| -10.198 | ENSG00000196664 | TLR7        | toll like receptor 7                                     | Plasma Membrane     |
| -12.73  | ENSG00000101916 | TLR8        | toll like receptor 8                                     | Plasma Membrane     |
| -5.753  | ENSG00000100926 | TM9SF1      | transmembrane 9 superfamily member 1                     | Plasma Membrane     |
| -1.896  | ENSG00000101337 | TM9SF4      | transmembrane 9 superfamily member 4                     | Cytoplasm           |
| -5.481  | ENSG00000259343 | TMC3-AS1    | TMC3 antisense RNA 1                                     | Other               |
| -6.418  | ENSG00000167895 | TMC8        | transmembrane channel like 8                             | Cytoplasm           |
| -8.678  | ENSG00000113119 | TMCO6       | transmembrane and coiled-coil domains 6                  | Other               |
| -10.093 | ENSG00000184988 | TMEM106A    | transmembrane protein 106A                               | Cytoplasm           |
| -10.447 | ENSG00000110108 | TMEM109     | transmembrane protein 109                                | Cytoplasm           |
| -8.015  | ENSG00000198270 | TMEM116     | transmembrane protein 116                                | Other               |
| -5.984  | ENSG00000139173 | TMEM117     | transmembrane protein 117                                | Cytoplasm           |
| -5.912  | ENSG00000183160 | TMEM119     | transmembrane protein 119                                | Cytoplasm           |
| -9.505  | ENSG00000183307 | TMEM121B    | transmembrane protein 121B                               | Nucleus             |
| -7.153  | ENSG00000171202 | TMEM126A    | transmembrane protein 126A                               | Cytoplasm           |
| -8.576  | ENSG00000171204 | TMEM126B    | transmembrane protein 126B                               | Cytoplasm           |
| -2.396  | ENSG00000075568 | TMEM131     | transmembrane protein 131                                | Extracellular Space |
| -5.802  | ENSG00000244187 | TMEM141     | transmembrane protein 141                                | Other               |
| -7.674  | ENSG00000161558 | TMEM143     | transmembrane protein 143                                | Cytoplasm           |
| -8.727  | ENSG00000180061 | TMEM150B    | transmembrane protein 150B                               | Plasma Membrane     |
| -12.6   | ENSG00000170006 | TMEM154     | transmembrane protein 154                                | Other               |
| -8.251  | ENSG00000121895 | TMEM156     | transmembrane protein 156                                | Other               |
| -7.644  | ENSG00000130748 | TMEM160     | transmembrane protein 160                                | Cytoplasm           |
| -9.83   | ENSG00000166822 | TMEM170A    | transmembrane protein 170A                               | Other               |
| -5.658  | ENSG00000184584 | TMEM173     | transmembrane protein 173                                | Cytoplasm           |
| -9.41   | ENSG00000185475 | TMEM179B    | transmembrane protein 179B                               | Nucleus             |
| -7.491  | ENSG00000184857 | TMEM186     | transmembrane protein 186                                | Cytoplasm           |
| -5.814  | ENSG00000226287 | TMEM191A    | transmembrane protein 191A (pseudogene)                  | Other               |
| -9.003  | ENSG00000182796 | TMEM198B    | transmembrane protein 198B (pseudogene)                  | Other               |
| -5.864  | ENSG00000164484 | TMEM200A    | transmembrane protein 200A                               | Other               |
| -5.636  | ENSG00000261423 | TMEM202-AS1 | chondroitin sulfate proteoglycan 4 pseudogene 3 Y-linked | Other               |
| -7.132  | ENSG00000131634 | TMEM204     | transmembrane protein 204                                | Plasma Membrane     |
| -7.856  | ENSG00000187049 | TMEM216     | transmembrane protein 216                                | Extracellular Space |
| -8.507  | ENSG00000150433 | TMEM218     | transmembrane protein 218                                | Extracellular Space |
| -7.225  | ENSG00000187824 | TMEM220     | transmembrane protein 220                                | Other               |
| -7.227  | ENSG00000168569 | TMEM223     | transmembrane protein 223                                | Other               |
| -7.65   | ENSG00000134490 | TMEM241     | transmembrane protein 241                                | Other               |
| -9.074  | ENSG00000215712 | TMEM242     | transmembrane protein 242                                | Other               |
| -9.018  | ENSG00000135185 | TMEM243     | transmembrane protein 243                                | Other               |
| -5.692  | ENSG00000149582 | TMEM25      | transmembrane protein 25                                 | Extracellular Space |
| -8.379  | ENSG00000134825 | TMEM258     | transmembrane protein 258                                | Other               |
| -2.894  | ENSG00000070269 | TMEM260     | transmembrane protein 260                                | Other               |
| -8.097  | ENSG00000151881 | TMEM267     | transmembrane protein 267                                | Other               |
| -8.7    | ENSG00000204161 | TMEM273     | transmembrane protein 273                                | Other               |
| -8.705  | ENSG00000121775 | TMEM39B     | transmembrane protein 39B                                | Cytoplasm           |
| -6.326  | ENSG00000181458 | TMEM45A     | transmembrane protein 45A                                | Plasma Membrane     |
| -5.845  | ENSG00000165685 | TMEM52B     | transmembrane protein 52B                                | Cytoplasm           |

|         |                 |              |                                                                      |                     |
|---------|-----------------|--------------|----------------------------------------------------------------------|---------------------|
| -8.362  | ENSG00000165548 | TMEM63C      | transmembrane protein 63C                                            | Other               |
| -11.089 | ENSG00000165071 | TMEM71       | transmembrane protein 71                                             | Cytoplasm           |
| -6.502  | ENSG00000174529 | TMEM81       | transmembrane protein 81                                             | Other               |
| -6.985  | ENSG00000151117 | TMEM86A      | transmembrane protein 86A                                            | Other               |
| -6.484  | ENSG00000167874 | TMEM88       | transmembrane protein 88                                             | Plasma Membrane     |
| -5.807  | ENSG00000167105 | TMEM92       | transmembrane protein 92                                             | Nucleus             |
| -5.029  | ENSG00000175348 | TMEM9B       | TMEM9 domain family member B                                         | Other               |
| -5.307  | ENSG00000254860 | TMEM9B-AS1   | TMEM9B antisense RNA 1                                               | Other               |
| -6.991  | ENSG00000167664 | TMIGD2       | transmembrane and immunoglobulin domain containing 2                 | Other               |
| -6.357  | ENSG00000121933 | TMIGD3       | transmembrane and immunoglobulin domain containing 3                 | Plasma Membrane     |
| -7.351  | ENSG00000257167 | TMPO-AS1     | TMPO antisense RNA 1                                                 | Other               |
| -8.675  | ENSG00000133687 | TMTC1        | transmembrane and tetratricopeptide repeat containing 1              | Cytoplasm           |
| -6.31   | ENSG00000123610 | TNFAIP6      | TNF alpha induced protein 6                                          | Extracellular Space |
| -9.454  | ENSG00000163154 | TNFAIP8L2    | TNF alpha induced protein 8 like 2                                   | Cytoplasm           |
| -5.733  | ENSG00000104689 | TNFRSF10A    | TNF receptor superfamily member 10a                                  | Plasma Membrane     |
| -10.375 | ENSG00000173535 | TNFRSF10C    | TNF receptor superfamily member 10c                                  | Plasma Membrane     |
| -8.627  | ENSG00000173530 | TNFRSF10D    | TNF receptor superfamily member 10d                                  | Plasma Membrane     |
| -6.102  | ENSG00000141655 | TNFRSF11A    | TNF receptor superfamily member 11a                                  | Plasma Membrane     |
| -6.304  | ENSG00000240505 | TNFRSF13B    | TNF receptor superfamily member 13B                                  | Plasma Membrane     |
| -6.257  | ENSG00000159958 | TNFRSF13C    | TNF receptor superfamily member 13C                                  | Plasma Membrane     |
| -6.043  | ENSG00000186891 | TNFRSF18     | TNF receptor superfamily member 18                                   | Plasma Membrane     |
| -11.314 | ENSG00000028137 | TNFRSF1B     | TNF receptor superfamily member 1B                                   | Plasma Membrane     |
| -9.506  | ENSG00000215788 | TNFRSF25     | TNF receptor superfamily member 25                                   | Plasma Membrane     |
| -7.614  | ENSG00000186827 | TNFRSF4      | TNF receptor superfamily member 4                                    | Plasma Membrane     |
| -8.736  | ENSG00000120949 | TNFRSF8      | TNF receptor superfamily member 8                                    | Plasma Membrane     |
| -5.898  | ENSG00000049249 | TNFRSF9      | TNF receptor superfamily member 9                                    | Plasma Membrane     |
| -9.298  | ENSG00000239697 | TNFSF12      | TNF superfamily member 12                                            | Extracellular Space |
| -8.455  | ENSG00000161955 | TNFSF13      | TNF superfamily member 13                                            | Extracellular Space |
| -9.025  | ENSG00000125735 | TNFSF14      | TNF superfamily member 14                                            | Extracellular Space |
| -10.212 | ENSG00000106952 | TNFSF8       | TNF superfamily member 8                                             | Plasma Membrane     |
| -5.445  | ENSG00000050730 | TNIP3        | TNFAIP3 interacting protein 3                                        | Cytoplasm           |
| -8.525  | ENSG00000130598 | TNNI2        | troponin I2, fast skeletal type                                      | Cytoplasm           |
| -8.311  | ENSG00000105048 | TNNT1        | troponin T1, slow skeletal type                                      | Cytoplasm           |
| -6.996  | ENSG00000130595 | TNNT3        | troponin T3, fast skeletal type                                      | Cytoplasm           |
| -7.53   | ENSG00000225423 | TNPO1P1      | transportin 1 pseudogene 1                                           | Other               |
| -1.192  | ENSG00000100354 | TNRC6B       | trinucleotide repeat containing adaptor 6B                           | Cytoplasm           |
| -8.586  | ENSG00000189350 | TOGARAM2     | TOG array regulator of axonemal microtubules 2                       | Other               |
| -6.023  | ENSG00000255153 | TOLLIP-AS1   | TOLLIP antisense RNA 1 (head to head)                                | Other               |
| -7.608  | ENSG00000255987 | TOMM20P2     | TOMM20 pseudogene 2                                                  | Other               |
| -7.491  | ENSG00000175768 | TOMM5        | translocase of outer mitochondrial membrane 5                        | Cytoplasm           |
| -9.444  | ENSG00000198846 | TOX          | thymocyte selection associated high mobility group box               | Nucleus             |
| -5.848  | ENSG00000248697 | TOX4P1       | TOX high mobility group box family member 4 pseudogene 1             | Other               |
| -8.529  | ENSG00000115129 | TP53I3       | tumor protein p53 inducible protein 3                                | Cytoplasm           |
| -4.1    | ENSG00000078900 | TP73         | tumor protein p73                                                    | Nucleus             |
| -5.823  | ENSG00000162341 | TPCN2        | two pore segment channel 2                                           | Cytoplasm           |
| -9.181  | ENSG00000141933 | TPGS1        | tubulin polyglutamylase complex subunit 1                            | Cytoplasm           |
| -7.632  | ENSG00000137364 | TPMT         | thiopurine S-methyltransferase                                       | Cytoplasm           |
| -6.721  | ENSG00000234076 | TPRG1-AS1    | TPRG1 antisense RNA 1                                                | Other               |
| -1.683  | ENSG00000133112 | TPT1         | tumor protein, translationally-controlled 1                          | Cytoplasm           |
| -9.308  | ENSG00000170919 | TPT1-AS1     | TPT1 antisense RNA 1                                                 | Other               |
| -6.028  | ENSG00000180221 | TPT1P10      | tumor protein, translationally-controlled 1 pseudogene 10            | Other               |
| -8.772  | ENSG00000244627 | TPTEP2       | TPTE pseudogene 2                                                    | Other               |
| -4.593  | ENSG00000170638 | TRABD        | TraB domain containing                                               | Extracellular Space |
| -9.099  | ENSG00000186854 | TRABD2A      | TraB domain containing 2A                                            | Plasma Membrane     |
| -8.963  | ENSG00000102871 | TRADD        | TNFRSF1A associated via death domain                                 | Cytoplasm           |
| -3.275  | ENSG00000131323 | TRAF3        | TNF receptor associated factor 3                                     | Cytoplasm           |
| -7.749  | ENSG00000231889 | TRAF3IP2-AS1 | TRAF3IP2 antisense RNA 1                                             | Other               |
| -12.923 | ENSG00000009790 | TRAF3IP3     | TRAF3 interacting protein 3                                          | Other               |
| -5.738  | ENSG00000183763 | TRAIIP       | TRAF interacting protein                                             | Cytoplasm           |
| -5.977  | ENSG00000211879 | TRAJ10       | T cell receptor alpha joining 10                                     | Other               |
| -7.085  | ENSG00000211870 | TRAJ19       | T cell receptor alpha joining 19 (non-functional)                    | Other               |
| -5.628  | ENSG00000211867 | TRAJ22       | T cell receptor alpha joining 22                                     | Other               |
| -5.948  | ENSG00000211866 | TRAJ23       | T cell receptor alpha joining 23                                     | Other               |
| -5.88   | ENSG00000211885 | TRAJ4        | T cell receptor alpha joining 4                                      | Other               |
| -6.42   | ENSG00000211883 | TRAJ6        | T cell receptor alpha joining 6                                      | Other               |
| -5.338  | ENSG00000211881 | TRAJ8        | T cell receptor alpha joining 8                                      | Other               |
| -7.911  | ENSG00000253251 | TRAPPC13     | trafficking protein particle complex 13                              | Cytoplasm           |
| -8.328  | ENSG00000196655 | TRAPPC4      | trafficking protein particle complex 4                               | Cytoplasm           |
| -7.994  | ENSG00000007255 | TRAPPC6A     | trafficking protein particle complex 6A                              | Cytoplasm           |
| -9.826  | ENSG00000163519 | TRAT1        | T cell receptor associated transmembrane adaptor 1                   | Plasma Membrane     |
| -5.116  | ENSG00000211785 | TRAV12-1     | T cell receptor alpha variable 12-1                                  | Other               |
| -6.096  | ENSG00000211789 | TRAV12-2     | T cell receptor alpha variable 12-2                                  | Other               |
| -7.682  | ENSG00000211794 | TRAV12-3     | T cell receptor alpha variable 12-3                                  | Other               |
| -7.634  | ENSG00000211788 | TRAV13-1     | T cell receptor alpha variable 13-1                                  | Other               |
| -5.673  | ENSG00000211791 | TRAV13-2     | T cell receptor alpha variable 13-2                                  | Other               |
| -5.668  | ENSG00000211799 | TRAV19       | T cell receptor alpha variable 19                                    | Plasma Membrane     |
| -6.179  | ENSG00000211810 | TRAV29DV5    | T cell receptor alpha variable 29/delta variable 5 (gene/pseudogene) | Plasma Membrane     |
| -5.686  | ENSG00000211778 | TRAV4        | T cell receptor alpha variable 4                                     | Other               |
| -11.714 | ENSG00000211772 | TRBC2        | T cell receptor beta constant 2                                      | Other               |
| -7.136  | ENSG00000241657 | TRBV11-2     | T cell receptor beta variable 11-2                                   | Other               |
| -5.776  | ENSG00000211747 | TRBV20-1     | T cell receptor beta variable 20-1                                   | Other               |
| -5.657  | ENSG00000211752 | TRBV27       | T cell receptor beta variable 27                                     | Other               |
| -6.951  | ENSG00000232869 | TRBV29-1     | T cell receptor beta variable 29-1                                   | Other               |
| -6.635  | ENSG00000211734 | TRBV5-1      | T cell receptor beta variable 5-1                                    | Other               |
| -6.31   | ENSG00000230099 | TRBV5-4      | T cell receptor beta variable 5-4                                    | Other               |
| -6.11   | ENSG00000211714 | TRBV7-3      | T cell receptor beta variable 7-3                                    | Other               |
| -9.117  | ENSG00000211829 | TRDC         | T cell receptor delta constant                                       | Other               |
| -11.085 | ENSG00000124731 | TREM1        | triggering receptor expressed on myeloid cells 1                     | Plasma Membrane     |
| -6.949  | ENSG00000184106 | TREML3P      | triggering receptor expressed on myeloid cells like 3, pseudogene    | Other               |
| -5.213  | ENSG00000183479 | TREX2        | three prime repair exonuclease 2                                     | Nucleus             |
| -5.937  | ENSG00000211688 | TRGJP2       | T cell receptor gamma joining P2                                     | Other               |

|         |                 |               |                                                                                     |                     |
|---------|-----------------|---------------|-------------------------------------------------------------------------------------|---------------------|
| -7.459  | ENSG00000249978 | TRGV7         | T cell receptor gamma variable 7 (pseudogene)                                       | Other               |
| -7.223  | ENSG00000211696 | TRGV8         | T cell receptor gamma variable 8                                                    | Other               |
| -8.672  | ENSG00000170855 | TRIAP1        | TP53 regulated inhibitor of apoptosis 1                                             | Cytoplasm           |
| -7.346  | ENSG00000221926 | TRIM16        | tripartite motif containing 16                                                      | Cytoplasm           |
| -5.808  | ENSG00000132274 | TRIM22        | tripartite motif containing 22                                                      | Cytoplasm           |
| -4.303  | ENSG00000112343 | TRIM38        | tripartite motif containing 38                                                      | Cytoplasm           |
| -5.395  | ENSG00000163462 | TRIM46        | tripartite motif containing 46                                                      | Cytoplasm           |
| -8.216  | ENSG00000248275 | TRIM52-AS1    | TRIM52 antisense RNA 1 (head to head)                                               | Other               |
| -5.803  | ENSG00000227986 | TRIM60P18     | tripartite motif containing 60 pseudogene 18                                        | Other               |
| -7.766  | ENSG00000146054 | TRIM7         | tripartite motif containing 7                                                       | Cytoplasm           |
| -8.326  | ENSG00000174353 | TRIM73/TRIM74 | tripartite motif containing 74                                                      | Cytoplasm           |
| -6.777  | ENSG00000100505 | TRIM9         | tripartite motif containing 9                                                       | Cytoplasm           |
| -9.609  | ENSG00000104907 | TRMT1         | tRNA methyltransferase 1                                                            | Extracellular Space |
| -9.065  | ENSG00000165275 | TRMT10B       | tRNA methyltransferase 10B                                                          | Cytoplasm           |
| -5.046  | ENSG00000099899 | TRMT2A        | tRNA methyltransferase 2 homolog A                                                  | Other               |
| -5.576  | ENSG00000253368 | TRNP1         | TMF1-regulated nuclear protein 1                                                    | Nucleus             |
| -5.918  | ENSG00000135451 | TROAP         | trophinin associated protein                                                        | Cytoplasm           |
| -1.469  | ENSG00000100991 | TRPC4AP       | transient receptor potential cation channel subfamily C member 4 associated protein | Cytoplasm           |
| -8.534  | ENSG00000119121 | TRPM6         | transient receptor potential cation channel subfamily M member 6                    | Plasma Membrane     |
| -10.379 | ENSG00000187688 | TRPV2         | transient receptor potential cation channel subfamily V member 2                    | Plasma Membrane     |
| -5.794  | ENSG00000111199 | TRPV4         | transient receptor potential cation channel subfamily V member 4                    | Plasma Membrane     |
| -7.446  | ENSG00000123297 | TSMF          | Ts translation elongation factor, mitochondrial                                     | Cytoplasm           |
| -7.999  | ENSG00000135951 | TSGA10        | testis specific 10                                                                  | Cytoplasm           |
| -4.956  | ENSG00000134198 | TSPAN2        | tetraspanin 2                                                                       | Extracellular Space |
| -8.318  | ENSG00000135452 | TSPAN31       | tetraspanin 31                                                                      | Plasma Membrane     |
| -4.262  | ENSG00000214063 | TSPAN4        | tetraspanin 4                                                                       | Plasma Membrane     |
| -5.83   | ENSG00000100300 | TSP0          | translocator protein                                                                | Cytoplasm           |
| -7.432  | ENSG00000235217 | TSPY26P       | testis specific protein Y-linked 26, pseudogene                                     | Other               |
| -6.624  | ENSG00000180543 | TSPYL5        | TSPY like 5                                                                         | Other               |
| -6.142  | ENSG00000178093 | TSSK6         | testis specific serine kinase 6                                                     | Nucleus             |
| -6.43   | ENSG00000228506 | TSTD3         | thiosulfate sulfurtransferase like domain containing 3                              | Other               |
| -8.67   | ENSG00000167094 | TTC16         | tetratricopeptide repeat domain 16                                                  | Other               |
| -7.837  | ENSG00000006555 | TTC22         | tetratricopeptide repeat domain 22                                                  | Other               |
| -5.776  | ENSG00000187862 | TTC24         | tetratricopeptide repeat domain 24                                                  | Other               |
| -8.623  | ENSG00000204815 | TTC25         | tetratricopeptide repeat domain 25                                                  | Cytoplasm           |
| -6.61   | ENSG00000197557 | TTC30A        | tetratricopeptide repeat domain 30A                                                 | Extracellular Space |
| -6.322  | ENSG00000196659 | TTC30B        | tetratricopeptide repeat domain 30B                                                 | Extracellular Space |
| -7.081  | ENSG00000215912 | TTC34         | tetratricopeptide repeat domain 34                                                  | Other               |
| -5.741  | ENSG00000075234 | TTC38         | tetratricopeptide repeat domain 38                                                  | Cytoplasm           |
| -4.771  | ENSG00000243725 | TTC4          | tetratricopeptide repeat domain 4                                                   | Other               |
| -1.947  | ENSG00000068724 | TTC7A         | tetratricopeptide repeat domain 7A                                                  | Plasma Membrane     |
| -6.997  | ENSG00000165533 | TTC8          | tetratricopeptide repeat domain 8                                                   | Cytoplasm           |
| -8.463  | ENSG00000162222 | TTC9C         | tetratricopeptide repeat domain 9C                                                  | Other               |
| -9.972  | ENSG00000119685 | TTL5          | tubulin tyrosine ligase like 5                                                      | Cytoplasm           |
| -11.865 | ENSG00000155657 | TTN           | titin                                                                               | Cytoplasm           |
| -10.168 | ENSG00000141540 | TTYH2         | tweety family member 2                                                              | Other               |
| -6.044  | ENSG00000224802 | TUBB4BP2      | tubulin beta 4B class IVb pseudogene 2                                              | Other               |
| -7.727  | ENSG00000108423 | TUBD1         | tubulin delta 1                                                                     | Cytoplasm           |
| -8.067  | ENSG00000074935 | TUBE1         | tubulin epsilon 1                                                                   | Cytoplasm           |
| -1.749  | ENSG00000128159 | TUBGCP6       | tubulin gamma complex associated protein 6                                          | Cytoplasm           |
| -6.647  | ENSG00000149016 | TUT1          | terminal uridylyl transferase 1, U6 snRNA-specific                                  | Nucleus             |
| -7.855  | ENSG00000247596 | TWF2          | twinfilin actin binding protein 2                                                   | Cytoplasm           |
| -7.284  | ENSG00000107815 | TWNK          | twinkle mtDNA helicase                                                              | Cytoplasm           |
| -6.588  | ENSG00000164440 | TXLNB         | taxilin beta                                                                        | Cytoplasm           |
| -9.858  | ENSG00000184470 | TXNRD2        | thioredoxin reductase 2                                                             | Cytoplasm           |
| -13.791 | ENSG00000011600 | TYROBP        | TYRO protein tyrosine kinase binding protein                                        | Plasma Membrane     |
| -6.931  | ENSG00000161265 | U2AF1L4       | U2 small nuclear RNA auxiliary factor 1 like 4                                      | Nucleus             |
| -5.706  | ENSG00000212195 | U3            | chondroitin sulfate proteoglycan 4 pseudogene 3 Y-linked                            | Other               |
| -6.034  | ENSG00000271817 | U3            | chondroitin sulfate proteoglycan 4 pseudogene 3 Y-linked                            | Other               |
| -7.791  | ENSG00000272462 | UB1328.1      | chondroitin sulfate proteoglycan 4 pseudogene 3 Y-linked                            | Other               |
| -9.21   | ENSG00000160185 | UBASH3A       | ubiquitin associated and SH3 domain containing A                                    | Cytoplasm           |
| -5.753  | ENSG00000230037 | UBBP1         | ubiquitin B pseudogene 1                                                            | Other               |
| -3.98   | ENSG00000119048 | UBE2B         | ubiquitin conjugating enzyme E2 B                                                   | Cytoplasm           |
| -2.448  | ENSG00000140367 | UBE2Q2        | ubiquitin conjugating enzyme E2 Q2                                                  | Cytoplasm           |
| -8.427  | ENSG00000244687 | UBE2V1        | ubiquitin conjugating enzyme E2 V1                                                  | Nucleus             |
| -9.049  | ENSG00000120942 | UBIAD1        | UbiA prenyltransferase domain containing 1                                          | Nucleus             |
| -4.824  | ENSG00000138629 | UBL7          | ubiquitin like 7                                                                    | Other               |
| -6.904  | ENSG00000247240 | UBL7-AS1      | UBL7 antisense RNA 1 (head to head)                                                 | Other               |
| -7.545  | ENSG00000246263 | UBR5-AS1      | UBR5 antisense RNA 1                                                                | Other               |
| -7.414  | ENSG00000162543 | UBXN10        | UBX domain protein 10                                                               | Extracellular Space |
| -6.178  | ENSG00000104691 | UBXN8         | UBX domain protein 8                                                                | Cytoplasm           |
| -5.447  | ENSG00000118939 | UCHL3         | ubiquitin C-terminal hydrolase L3                                                   | Cytoplasm           |
| -7.378  | ENSG00000175564 | UCP3          | uncoupling protein 3                                                                | Cytoplasm           |
| -4.483  | ENSG00000176125 | UFSP1         | UFM1 specific peptidase 1 (inactive)                                                | Cytoplasm           |
| -6.728  | ENSG00000124602 | UNC5CL        | unc-5 family C-terminal like                                                        | Cytoplasm           |
| -6.541  | ENSG00000110057 | UNC93B1       | unc-93 homolog B1, TLR signaling regulator                                          | Cytoplasm           |
| -6.188  | ENSG00000100024 | UPB1          | beta-ureidopropionase 1                                                             | Cytoplasm           |
| -6.065  | ENSG00000100373 | UPK3A         | uropod protein 3A                                                                   | Cytoplasm           |
| -11.501 | ENSG00000183696 | UPP1          | uridine phosphorylase 1                                                             | Cytoplasm           |
| -7.574  | ENSG00000204922 | UQC3          | ubiquinol-cytochrome c reductase complex assembly factor 3                          | Extracellular Space |
| -2.45   | ENSG00000140455 | USP3          | ubiquitin specific peptidase 3                                                      | Cytoplasm           |
| -8.825  | ENSG00000135093 | USP30         | ubiquitin specific peptidase 30                                                     | Cytoplasm           |
| -6.853  | ENSG00000256262 | USP30-AS1     | USP30 antisense RNA 1                                                               | Other               |
| -5.12   | ENSG00000189423 | USP32P3       | ubiquitin specific peptidase 32 pseudogene 3                                        | Other               |
| -8.14   | ENSG00000111962 | UST           | uronyl 2-sulfotransferase                                                           | Cytoplasm           |
| -9.567  | ENSG00000164338 | UTP15         | UTP15 small subunit processome component                                            | Nucleus             |
| -10.622 | ENSG00000126756 | UXT           | ubiquitously expressed prefoldin like chaperone                                     | Cytoplasm           |
| -7.759  | ENSG00000139190 | VAMP1         | vesicle associated membrane protein 1                                               | Cytoplasm           |
| -8.864  | ENSG00000168899 | VAMP5         | vesicle associated membrane protein 5                                               | Plasma Membrane     |
| -16.73  | ENSG00000038427 | VCAN          | versican                                                                            | Extracellular Space |
| -8.953  | ENSG00000100483 | VCPKMT        | valosin containing protein lysine methyltransferase                                 | Cytoplasm           |



|         |                 |                     |                                                                                          |                     |
|---------|-----------------|---------------------|------------------------------------------------------------------------------------------|---------------------|
| -6.681  | ENSG00000229036 | VDAC1P8             | voltage dependent anion channel 1 pseudogene 8                                           | Other               |
| -9.34   | ENSG00000151650 | VENTX               | VENT homeobox                                                                            | Nucleus             |
| -9.474  | ENSG00000136059 | VILL                | villin like                                                                              | Cytoplasm           |
| -6.076  | ENSG00000106018 | VIPR2               | vasoactive intestinal peptide receptor 2                                                 | Plasma Membrane     |
| -12.193 | ENSG00000112303 | VNN2                | vanin 2                                                                                  | Other               |
| -9.725  | ENSG00000093134 | VNN3                | vanin 3                                                                                  | Extracellular Space |
| -2.616  | ENSG00000132549 | VPS13B              | vacuolar protein sorting 13 homolog B                                                    | Nucleus             |
| -1.551  | ENSG00000129003 | VPS13C              | vacuolar protein sorting 13 homolog C                                                    | Cytoplasm           |
| -9.008  | ENSG00000139719 | VPS33A              | VPS33A core subunit of CORVET and HOPS complexes                                         | Cytoplasm           |
| -10.95  | ENSG00000103544 | VPS35L              | VPS35 endosomal protein sorting factor like                                              | Cytoplasm           |
| -4.298  | ENSG00000136100 | VPS36               | vacuolar protein sorting 36 homolog                                                      | Cytoplasm           |
| -1.403  | ENSG00000166887 | VPS39               | VPS39 subunit of HOPS complex                                                            | Cytoplasm           |
| -3.334  | ENSG00000149823 | VPS51               | VPS51 subunit of GARP complex                                                            | Cytoplasm           |
| -8.599  | ENSG00000155659 | VSIG4               | V-set and immunoglobulin domain containing 4                                             | Plasma Membrane     |
| -3.634  | ENSG00000107738 | VSIR                | V-set immunoregulatory receptor                                                          | Plasma Membrane     |
| -9.593  | ENSG00000189068 | VSTM1               | V-set and transmembrane domain containing 1                                              | Other               |
| -7.283  | ENSG00000015285 | WAS                 | Wiskott-Aldrich syndrome                                                                 | Cytoplasm           |
| -7.652  | ENSG00000112290 | WASF1               | WAS protein family member 1                                                              | Nucleus             |
| -8.448  | ENSG00000227232 | WASH7P              | WAS protein family homolog 7, pseudogene                                                 | Other               |
| -9.3    | ENSG00000226210 | WASH8P              | WAS protein family homolog 8, pseudogene                                                 | Other               |
| -5.821  | ENSG00000181404 | WASHC1              | WASH complex subunit 1                                                                   | Cytoplasm           |
| -7.071  | ENSG00000163026 | WDPC                | WD repeat and coiled coil containing                                                     | Other               |
| -11.787 | ENSG00000128815 | WDFY4               | WDFY family member 4                                                                     | Other               |
| -7.922  | ENSG00000157796 | WDR19               | WD repeat domain 19                                                                      | Extracellular Space |
| -4.818  | ENSG00000047056 | WDR37               | WD repeat domain 37                                                                      | Other               |
| -8.429  | ENSG00000174776 | WDR49               | WD repeat domain 49                                                                      | Other               |
| -7.606  | ENSG00000185798 | WDR53               | WD repeat domain 53                                                                      | Other               |
| -8.029  | ENSG00000005448 | WDR54               | WD repeat domain 54                                                                      | Other               |
| -5.963  | ENSG00000158023 | WDR66               | WD repeat domain 66                                                                      | Cytoplasm           |
| -5.957  | ENSG00000167716 | WDR81               | WD repeat domain 81                                                                      | Plasma Membrane     |
| -8.487  | ENSG00000105583 | WDR83O5             | WD repeat domain 83 opposite strand                                                      | Other               |
| -6.749  | ENSG00000243836 | WDR86-AS1           | WDR86 antisense RNA 1                                                                    | Other               |
| -10.409 | ENSG00000105875 | WDR91               | WD repeat domain 91                                                                      | Cytoplasm           |
| -1.569  | ENSG00000142784 | WDTC1               | WD and tetratricopeptide repeats 1                                                       | Nucleus             |
| -5.658  | ENSG00000228775 | WEE2-AS1            | WEE2 antisense RNA 1                                                                     | Other               |
| -6.702  | ENSG00000169884 | WNT10B              | Wnt family member 10B                                                                    | Extracellular Space |
| -5.583  | ENSG00000085741 | WNT11               | Wnt family member 11                                                                     | Extracellular Space |
| -3.301  | ENSG00000076924 | XAB2                | XPA binding protein 2                                                                    | Nucleus             |
| -11.488 | ENSG00000132530 | XAF1                | XIAP associated factor 1                                                                 | Nucleus             |
| -9.179  | ENSG00000158156 | XKR8                | XK related 8                                                                             | Plasma Membrane     |
| -1.31   | ENSG00000169180 | XPO6                | exportin 6                                                                               | Cytoplasm           |
| -7.443  | ENSG00000126215 | XRCC3               | X-ray repair cross complementing 3                                                       | Nucleus             |
| -8.94   | ENSG00000152422 | XRCC4               | X-ray repair cross complementing 4                                                       | Nucleus             |
| -6.804  | ENSG00000271581 | Xxbac-BPG248L24.12  | chondroitin sulfate proteoglycan 4 pseudogene 3 Y-linked                                 | Other               |
| -7.752  | ENSG00000272316 | Xxbac-BPGBPG55C20.2 | chondroitin sulfate proteoglycan 4 pseudogene 3 Y-linked                                 | Other               |
| -6.943  | ENSG00000213600 | XXCOS_LUCA161       | chondroitin sulfate proteoglycan 4 pseudogene 3 Y-linked                                 | Other               |
| -6.909  | ENSG00000214888 | XXYAC_YM21GA27      | chondroitin sulfate proteoglycan 4 pseudogene 3 Y-linked                                 | Other               |
| -7.732  | ENSG00000093217 | XYLB                | xylulokinase                                                                             | Cytoplasm           |
| -7.75   | ENSG00000252759 | Y_RNA               | chondroitin sulfate proteoglycan 4 pseudogene 3 Y-linked                                 | Other               |
| -6.709  | ENSG00000202127 | Y_RNA               | chondroitin sulfate proteoglycan 4 pseudogene 3 Y-linked                                 | Other               |
| -6.418  | ENSG00000207034 | Y_RNA               | chondroitin sulfate proteoglycan 4 pseudogene 3 Y-linked                                 | Other               |
| -5.903  | ENSG00000239040 | Y_RNA               | chondroitin sulfate proteoglycan 4 pseudogene 3 Y-linked                                 | Other               |
| -6.85   | ENSG00000202078 | Y_RNA               | chondroitin sulfate proteoglycan 4 pseudogene 3 Y-linked                                 | Other               |
| -5.633  | ENSG00000252965 | Y_RNA               | chondroitin sulfate proteoglycan 4 pseudogene 3 Y-linked                                 | Other               |
| -5.937  | ENSG00000201208 | Y_RNA               | chondroitin sulfate proteoglycan 4 pseudogene 3 Y-linked                                 | Other               |
| -4.409  | ENSG00000251728 | Y_RNA               | chondroitin sulfate proteoglycan 4 pseudogene 3 Y-linked                                 | Other               |
| -5.607  | ENSG00000207370 | Y_RNA               | chondroitin sulfate proteoglycan 4 pseudogene 3 Y-linked                                 | Other               |
| -9.061  | ENSG00000224003 | YES1P1              | YES1 pseudogene 1                                                                        | Other               |
| -3.871  | ENSG00000130733 | YIPF2               | Yip1 domain family member 2                                                              | Cytoplasm           |
| -9.891  | ENSG00000105248 | YJU2                | YJU2 splicing factor homolog                                                             | Nucleus             |
| -8.384  | ENSG00000166793 | YPEL4               | yippee like 4                                                                            | Nucleus             |
| -4.029  | ENSG00000196449 | YRDC                | yrDC N6-threonylcarbamoyltransferase domain containing                                   | Other               |
| -5.978  | ENSG00000270673 | YTHDF3-AS1          | YTHDF3 antisense RNA 1 (head to head)                                                    | Other               |
| -5.28   | ENSG00000256464 | YWHAHP2             | tyrosine 3-monooxygenase/tryptophan 5-monooxygenase activation protein beta pseudogene 2 | Other               |
| -5.805  | ENSG00000230797 | YY2                 | YY2 transcription factor                                                                 | Nucleus             |
| -12.044 | ENSG00000115085 | ZAP70               | zeta chain of T cell receptor associated protein kinase 70                               | Plasma Membrane     |
| -6.742  | ENSG00000247271 | ZBED5-AS1           | ZBED5 antisense RNA 1                                                                    | Other               |
| -8.649  | ENSG00000188707 | ZBED6CL             | ZBED6 C-terminal like                                                                    | Other               |
| -9.763  | ENSG00000124256 | ZBP1                | Z-DNA binding protein 1                                                                  | Cytoplasm           |
| -8.135  | ENSG00000256628 | ZBTB11-AS1          | ZBTB11 antisense RNA 1                                                                   | Other               |
| -5.822  | ENSG00000185670 | ZBTB3               | zinc finger and BTB domain containing 3                                                  | Nucleus             |
| -4.504  | ENSG00000114853 | ZBTB47              | zinc finger and BTB domain containing 47                                                 | Other               |
| -8.806  | ENSG00000168826 | ZBTB49              | zinc finger and BTB domain containing 49                                                 | Nucleus             |
| -9.058  | ENSG00000178199 | ZC3H12D             | zinc finger CCCH-type containing 12D                                                     | Cytoplasm           |
| -9.214  | ENSG00000144161 | ZC3H8               | zinc finger CCCH-type containing 8                                                       | Nucleus             |
| -7.896  | ENSG00000091732 | ZC3HC1              | zinc finger C3HC-type containing 1                                                       | Nucleus             |
| -6.064  | ENSG00000165424 | ZCCHC24             | zinc finger CCHC-type containing 24                                                      | Other               |
| -6.605  | ENSG00000159714 | ZDHHC1              | zinc finger DHHC-type containing 1                                                       | Nucleus             |
| -6.123  | ENSG00000188818 | ZDHHC11             | zinc finger DHHC-type containing 11                                                      | Cytoplasm           |
| -9.427  | ENSG00000177054 | ZDHHC13             | zinc finger DHHC-type containing 13                                                      | Nucleus             |
| -5.177  | ENSG00000236953 | ZDHHC20-IT1         | ZDHHC20 intronic transcript 1                                                            | Other               |
| -8.539  | ENSG00000174165 | ZDHHC24             | zinc finger DHHC-type containing 24                                                      | Plasma Membrane     |
| -5.513  | ENSG00000099904 | ZDHHC8              | zinc finger DHHC-type containing 8                                                       | Cytoplasm           |
| -10.67  | ENSG00000148516 | ZEB1                | zinc finger E-box binding homeobox 1                                                     | Nucleus             |
| -7.87   | ENSG00000238057 | ZEB2-AS1            | ZEB2 antisense RNA 1                                                                     | Other               |
| -6.344  | ENSG00000136367 | ZFHX2               | zinc finger homeobox 2                                                                   | Nucleus             |
| -8.917  | ENSG00000142065 | ZFP14               | ZFP14 zinc finger protein                                                                | Nucleus             |
| -8.261  | ENSG00000181638 | ZFP41               | ZFP41 zinc finger protein                                                                | Nucleus             |
| -8.294  | ENSG00000187815 | ZFP69               | ZFP69 zinc finger protein                                                                | Nucleus             |
| -6.678  | ENSG00000181007 | ZFP82               | ZFP82 zinc finger protein                                                                | Nucleus             |
| -10.007 | ENSG00000184939 | ZFP90               | ZFP90 zinc finger protein                                                                | Nucleus             |

|         |                 |               |                                          |           |
|---------|-----------------|---------------|------------------------------------------|-----------|
| -6.321  | ENSG00000189420 | ZFP92         | ZFP92 zinc finger protein                | Nucleus   |
| -9.195  | ENSG00000162300 | ZFPL1         | zinc finger protein like 1               | Cytoplasm |
| -4.995  | ENSG00000162078 | ZG16B         | zymogen granule protein 16B              | Cytoplasm |
| -9.094  | ENSG00000155592 | ZKSCAN2       | zinc finger with KRAB and SCAN domains 2 | Nucleus   |
| -8.084  | ENSG00000189298 | ZKSCAN3       | zinc finger with KRAB and SCAN domains 3 | Nucleus   |
| -7.594  | ENSG00000187626 | ZKSCAN4       | zinc finger with KRAB and SCAN domains 4 | Nucleus   |
| -6.119  | ENSG00000196345 | ZKSCAN7       | zinc finger with KRAB and SCAN domains 7 | Nucleus   |
| -8.666  | ENSG00000100319 | ZMAT5         | zinc finger matrin-type 5                | Nucleus   |
| -5.863  | ENSG00000224596 | ZMIZ1-AS1     | ZMIZ1 antisense RNA 1                    | Other     |
| -5.401  | ENSG00000004838 | ZMYND10       | zinc finger MYND-type containing 10      | Cytoplasm |
| -7.789  | ENSG00000141497 | ZMYND15       | zinc finger MYND-type containing 15      | Other     |
| -9.018  | ENSG00000197020 | ZNF100        | zinc finger protein 100                  | Nucleus   |
| -5.895  | ENSG00000234473 | ZNF101P2      | zinc finger protein 101 pseudogene 2     | Other     |
| -5.779  | ENSG00000131849 | ZNF132        | zinc finger protein 132                  | Nucleus   |
| -6.836  | ENSG00000123870 | ZNF137P       | zinc finger protein 137, pseudogene      | Nucleus   |
| -8.877  | ENSG00000105708 | ZNF14         | zinc finger protein 14                   | Nucleus   |
| -8.833  | ENSG00000179909 | ZNF154        | zinc finger protein 154                  | Nucleus   |
| -7.492  | ENSG00000204920 | ZNF155        | zinc finger protein 155                  | Nucleus   |
| -8.899  | ENSG00000175787 | ZNF169        | zinc finger protein 169                  | Nucleus   |
| -8.85   | ENSG00000096654 | ZNF184        | zinc finger protein 184                  | Nucleus   |
| -7.525  | ENSG00000157429 | ZNF19         | zinc finger protein 19                   | Nucleus   |
| -6.376  | ENSG00000204789 | ZNF204P       | zinc finger protein 204, pseudogene      | Other     |
| -1.916  | ENSG0000010244  | ZNF207        | zinc finger protein 207                  | Nucleus   |
| -6.693  | ENSG00000167377 | ZNF23         | zinc finger protein 23                   | Nucleus   |
| -8.142  | ENSG00000159882 | ZNF230        | zinc finger protein 230                  | Nucleus   |
| -7.443  | ENSG00000167840 | ZNF232        | zinc finger protein 232                  | Nucleus   |
| -8.119  | ENSG00000263002 | ZNF234        | zinc finger protein 234                  | Nucleus   |
| -6.294  | ENSG00000197134 | ZNF257        | zinc finger protein 257                  | Nucleus   |
| -6.533  | ENSG00000198393 | ZNF26         | zinc finger protein 26                   | Nucleus   |
| -4.934  | ENSG00000198039 | ZNF273        | zinc finger protein 273                  | Nucleus   |
| -8.178  | ENSG00000056277 | ZNF280C       | zinc finger protein 280C                 | Nucleus   |
| -6.2    | ENSG00000187607 | ZNF286A       | zinc finger protein 286A                 | Nucleus   |
| -6.581  | ENSG00000141040 | ZNF287        | zinc finger protein 287                  | Nucleus   |
| -8.678  | ENSG00000170684 | ZNF296        | zinc finger protein 296                  | Nucleus   |
| -6.978  | ENSG00000181315 | ZNF322        | zinc finger protein 322                  | Cytoplasm |
| -8.268  | ENSG00000083812 | ZNF324        | zinc finger protein 324                  | Nucleus   |
| -7.487  | ENSG00000181894 | ZNF329        | zinc finger protein 329                  | Other     |
| -6.148  | ENSG00000213742 | ZNF337-AS1    | ZNF337 antisense RNA 1                   | Other     |
| -7.759  | ENSG00000196378 | ZNF34         | zinc finger protein 34                   | Nucleus   |
| -8.275  | ENSG00000131061 | ZNF341        | zinc finger protein 341                  | Nucleus   |
| -5.305  | ENSG00000169131 | ZNF354A       | zinc finger protein 354A                 | Nucleus   |
| -6.694  | ENSG00000138311 | ZNF365        | zinc finger protein 365                  | Cytoplasm |
| -7.195  | ENSG00000178175 | ZNF366        | zinc finger protein 366                  | Nucleus   |
| -10.889 | ENSG00000234420 | ZNF378P       | zinc finger protein 378, pseudogene      | Other     |
| -9.136  | ENSG00000188283 | ZNF383        | zinc finger protein 383                  | Nucleus   |
| -3.401  | ENSG00000161642 | ZNF385A       | zinc finger protein 385A                 | Nucleus   |
| -6.063  | ENSG00000186496 | ZNF396        | zinc finger protein 396                  | Nucleus   |
| -5.213  | ENSG00000176222 | ZNF404        | zinc finger protein 404                  | Other     |
| -8.699  | ENSG00000175213 | ZNF408        | zinc finger protein 408                  | Nucleus   |
| -8.943  | ENSG00000119725 | ZNF410        | zinc finger protein 410                  | Nucleus   |
| -8.038  | ENSG00000266127 | ZNF415P1      | zinc finger protein 415 pseudogene 1     | Other     |
| -7.58   | ENSG00000083817 | ZNF416        | zinc finger protein 416                  | Nucleus   |
| -6.515  | ENSG00000173480 | ZNF417/ZNF587 | zinc finger protein 417                  | Nucleus   |
| -8.02   | ENSG00000197050 | ZNF420        | zinc finger protein 420                  | Cytoplasm |
| -8.981  | ENSG00000171291 | ZNF439        | zinc finger protein 439                  | Nucleus   |
| -5.976  | ENSG00000197044 | ZNF441        | zinc finger protein 441                  | Nucleus   |
| -9.312  | ENSG00000124459 | ZNF45         | zinc finger protein 45                   | Nucleus   |
| -7.642  | ENSG00000225614 | ZNF469        | zinc finger protein 469                  | Nucleus   |
| -6.841  | ENSG00000197016 | ZNF470        | zinc finger protein 470                  | Nucleus   |
| -7.555  | ENSG00000173258 | ZNF483        | zinc finger protein 483                  | Nucleus   |
| -9.981  | ENSG00000127081 | ZNF484        | zinc finger protein 484                  | Nucleus   |
| -6.814  | ENSG00000198298 | ZNF485        | zinc finger protein 485                  | Nucleus   |
| -7.91   | ENSG00000256229 | ZNF486        | zinc finger protein 486                  | Nucleus   |
| -8.45   | ENSG00000243660 | ZNF487        | zinc finger protein 487                  | Other     |
| -7.982  | ENSG00000188033 | ZNF490        | zinc finger protein 490                  | Nucleus   |
| -5.98   | ENSG00000144026 | ZNF514        | zinc finger protein 514                  | Nucleus   |
| -7.266  | ENSG00000197363 | ZNF517        | zinc finger protein 517                  | Nucleus   |
| -7.211  | ENSG00000175322 | ZNF519        | zinc finger protein 519                  | Nucleus   |
| -9.272  | ENSG00000198795 | ZNF521        | zinc finger protein 521                  | Nucleus   |
| -7.254  | ENSG00000189164 | ZNF527        | zinc finger protein 527                  | Nucleus   |
| -7.222  | ENSG00000183647 | ZNF530        | zinc finger protein 530                  | Other     |
| -6.943  | ENSG00000171817 | ZNF540        | zinc finger protein 540                  | Cytoplasm |
| -7.398  | ENSG00000187187 | ZNF546        | zinc finger protein 546                  | Nucleus   |
| -7.448  | ENSG00000172006 | ZNF554        | zinc finger protein 554                  | Nucleus   |
| -8.048  | ENSG00000186300 | ZNF555        | zinc finger protein 555                  | Other     |
| -5.559  | ENSG00000267106 | ZNF561-AS1    | ZNF561 antisense RNA 1 (head to head)    | Other     |
| -6.72   | ENSG00000249709 | ZNF564        | zinc finger protein 564                  | Nucleus   |
| -6.729  | ENSG00000196357 | ZNF565        | zinc finger protein 565                  | Nucleus   |
| -7.128  | ENSG00000186017 | ZNF566        | zinc finger protein 566                  | Nucleus   |
| -5.24   | ENSG00000171970 | ZNF57         | zinc finger protein 57                   | Other     |
| -7.584  | ENSG00000180479 | ZNF571        | zinc finger protein 571                  | Nucleus   |
| -6.991  | ENSG00000176472 | ZNF575        | zinc finger protein 575                  | Nucleus   |
| -6.577  | ENSG00000018869 | ZNF582        | zinc finger protein 582                  | Other     |
| -5.325  | ENSG00000171574 | ZNF584        | zinc finger protein 584                  | Nucleus   |
| -7.532  | ENSG00000196967 | ZNF585A       | zinc finger protein 585A                 | Nucleus   |
| -8.109  | ENSG00000245680 | ZNF585B       | zinc finger protein 585B                 | Nucleus   |
| -7.503  | ENSG00000167981 | ZNF597        | zinc finger protein 597                  | Nucleus   |
| -7.316  | ENSG00000166704 | ZNF606        | zinc finger protein 606                  | Nucleus   |
| -7.562  | ENSG00000177842 | ZNF620        | zinc finger protein 620                  | Nucleus   |
| -8.715  | ENSG00000197566 | ZNF624        | zinc finger protein 624                  | Nucleus   |
| -5.302  | ENSG00000167528 | ZNF641        | zinc finger protein 641                  | Other     |

|        |                 |              |                                                          |                 |
|--------|-----------------|--------------|----------------------------------------------------------|-----------------|
| -6.475 | ENSG00000197497 | ZNF665       | zinc finger protein 665                                  | Other           |
| -8.602 | ENSG00000167394 | ZNF668       | zinc finger protein 668                                  | Cytoplasm       |
| -8.933 | ENSG00000083814 | ZNF671       | zinc finger protein 671                                  | Nucleus         |
| -7.877 | ENSG00000251192 | ZNF674       | zinc finger protein 674                                  | Other           |
| -6.891 | ENSG00000230844 | ZNF674-AS1   | ZNF674 antisense RNA 1 (head to head)                    | Other           |
| -9.014 | ENSG00000176083 | ZNF683       | zinc finger protein 683                                  | Other           |
| -9.146 | ENSG00000156853 | ZNF689       | zinc finger protein 689                                  | Nucleus         |
| -6.542 | ENSG00000198429 | ZNF69        | zinc finger protein 69                                   | Nucleus         |
| -7.209 | ENSG00000164011 | ZNF691       | zinc finger protein 691                                  | Nucleus         |
| -5.42  | ENSG00000183779 | ZNF703       | zinc finger protein 703                                  | Nucleus         |
| -5.977 | ENSG00000178665 | ZNF713       | zinc finger protein 713                                  | Nucleus         |
| -6.723 | ENSG00000227124 | ZNF717       | zinc finger protein 717                                  | Nucleus         |
| -6.759 | ENSG00000196081 | ZNF724       | zinc finger protein 724                                  | Other           |
| -8.052 | ENSG00000169951 | ZNF764       | zinc finger protein 764                                  | Other           |
| -7.241 | ENSG00000175691 | ZNF77        | zinc finger protein 77                                   | Nucleus         |
| -7.496 | ENSG00000197128 | ZNF772       | zinc finger protein 772                                  | Other           |
| -5.788 | ENSG00000179922 | ZNF784       | zinc finger protein 784                                  | Other           |
| -5.676 | ENSG00000267254 | ZNF790-AS1   | ZNF790 antisense RNA 1                                   | Other           |
| -6.957 | ENSG00000267216 | ZNF8-ERVK3-1 | chondroitin sulfate proteoglycan 4 pseudogene 3 Y-linked | Other           |
| -5.214 | ENSG00000174255 | ZNF80        | zinc finger protein 80                                   | Nucleus         |
| -7.144 | ENSG00000170396 | ZNF804A      | zinc finger protein 804A                                 | Plasma Membrane |
| -9.113 | ENSG00000198346 | ZNF813       | zinc finger protein 813                                  | Other           |
| -8.693 | ENSG00000235944 | ZNF815P      | zinc finger protein 815, pseudogene                      | Other           |
| -7.056 | ENSG00000185869 | ZNF829       | zinc finger protein 829                                  | Other           |
| -9.988 | ENSG00000124203 | ZNF831       | zinc finger protein 831                                  | Other           |
| -6.092 | ENSG00000152475 | ZNF837       | zinc finger protein 837                                  | Other           |
| -9.703 | ENSG00000213799 | ZNF845       | zinc finger protein 845                                  | Other           |
| -8.798 | ENSG00000196605 | ZNF846       | zinc finger protein 846                                  | Other           |
| -7.829 | ENSG00000267041 | ZNF850       | zinc finger protein 850                                  | Other           |
| -8.406 | ENSG00000178917 | ZNF852       | zinc finger protein 852                                  | Other           |
| -6.344 | ENSG00000198155 | ZNF876P      | zinc finger protein 876, pseudogene                      | Other           |
| -8.081 | ENSG00000234284 | ZNF879       | zinc finger protein 879                                  | Other           |
| -6.072 | ENSG00000228623 | ZNF883       | zinc finger protein 883                                  | Other           |
| -6.101 | ENSG00000213793 | ZNF888       | zinc finger protein 888                                  | Other           |
| -6.158 | ENSG00000213988 | ZNF90        | zinc finger protein 90                                   | Nucleus         |
| -7.342 | ENSG00000174276 | ZNHIT2       | zinc finger HIT-type containing 2                        | Other           |
| -6.911 | ENSG00000121988 | ZRANB3       | zinc finger RANBP2-type containing 3                     | Nucleus         |
| -8.232 | ENSG00000196812 | ZSCAN16      | zinc finger and SCAN domain containing 16                | Nucleus         |
| -7.626 | ENSG00000269293 | ZSCAN16-AS1  | ZSCAN16 antisense RNA 1                                  | Other           |
| -7.447 | ENSG00000176371 | ZSCAN2       | zinc finger and SCAN domain containing 2                 | Nucleus         |
| -6.541 | ENSG00000121903 | ZSCAN20      | zinc finger and SCAN domain containing 20                | Nucleus         |
| -8.643 | ENSG00000137185 | ZSCAN9       | zinc finger and SCAN domain containing 9                 | Nucleus         |
| -7.319 | ENSG00000185453 | ZSWIM9       | zinc finger SWIM-type containing 9                       | Other           |

# Upregulated Genes: Disease and Function

| Categories                                                                       | Diseases or Functions Annotation                                | p-value  | Predicted Activation State | Activation z-score | Genes                                                                                                                                                                                                                                                                                                                                                                                                                                                                                                                                                                                                                                                                                                                                                                                                                                                                                                                                                                                                                                                                                                                                                                                          | # Molecules |
|----------------------------------------------------------------------------------|-----------------------------------------------------------------|----------|----------------------------|--------------------|------------------------------------------------------------------------------------------------------------------------------------------------------------------------------------------------------------------------------------------------------------------------------------------------------------------------------------------------------------------------------------------------------------------------------------------------------------------------------------------------------------------------------------------------------------------------------------------------------------------------------------------------------------------------------------------------------------------------------------------------------------------------------------------------------------------------------------------------------------------------------------------------------------------------------------------------------------------------------------------------------------------------------------------------------------------------------------------------------------------------------------------------------------------------------------------------|-------------|
| Cellular Movement                                                                | Cell movement of prostate cancer cell lines                     | 3.92E-07 |                            | 0.732              | AFAP1, AGR2, AKAP12, AR, CDH1, EDN1, EGF, EGFR, EHF, FOXA1, GDF15, HSP90AA1, HSP90B1, IGF1R, IRS1, LMNA, NDRG1, NRP1, PRKDC1, RAC1, SPDEF, TRPM8, WWTR1                                                                                                                                                                                                                                                                                                                                                                                                                                                                                                                                                                                                                                                                                                                                                                                                                                                                                                                                                                                                                                        | 24          |
| Cellular Development, Cellular Growth and Proliferation                          | Proliferation of prostate cancer cell lines                     | 3.51E-06 | Increased                  | 2.014              | AFAP1, AKAP12, ALCAM, AR, BMPR1B, CAPN13, CCN1, CCND1, CDH1, COBLL1, CXADR, DAB2, EDN1, EGF, EGFR, EHF, EPBB3, FASN, GF2, FOXA1, GDF15, H0XB13, HPN, IGF1R, IGF2, IGF2R, IGF2BP2, IGF2BP3, IGF2BP4, IGF2BP5, IGF2BP6, IGF2BP7, IGF2BP8, IGF2BP9, IGF2BP10, IGF2BP11, IGF2BP12, IGF2BP13, IGF2BP14, IGF2BP15, IGF2BP16, IGF2BP17, IGF2BP18, IGF2BP19, IGF2BP20, IGF2BP21, IGF2BP22, IGF2BP23, IGF2BP24, IGF2BP25, IGF2BP26, IGF2BP27, IGF2BP28, IGF2BP29, IGF2BP30, IGF2BP31, IGF2BP32, IGF2BP33, IGF2BP34, IGF2BP35, IGF2BP36, IGF2BP37, IGF2BP38, IGF2BP39, IGF2BP40, IGF2BP41, IGF2BP42, IGF2BP43, IGF2BP44, IGF2BP45, IGF2BP46, IGF2BP47, IGF2BP48, IGF2BP49, IGF2BP50, IGF2BP51, IGF2BP52, IGF2BP53, IGF2BP54, IGF2BP55, IGF2BP56, IGF2BP57, IGF2BP58, IGF2BP59, IGF2BP60, IGF2BP61, IGF2BP62, IGF2BP63, IGF2BP64, IGF2BP65, IGF2BP66, IGF2BP67, IGF2BP68, IGF2BP69, IGF2BP70, IGF2BP71, IGF2BP72, IGF2BP73, IGF2BP74, IGF2BP75, IGF2BP76, IGF2BP77, IGF2BP78, IGF2BP79, IGF2BP80, IGF2BP81, IGF2BP82, IGF2BP83, IGF2BP84, IGF2BP85, IGF2BP86, IGF2BP87, IGF2BP88, IGF2BP89, IGF2BP90, IGF2BP91, IGF2BP92, IGF2BP93, IGF2BP94, IGF2BP95, IGF2BP96, IGF2BP97, IGF2BP98, IGF2BP99, IGF2BP100 | 38          |
| Cellular Growth and Proliferation                                                | Colony formation of prostate cancer cell lines                  | 2.67E-05 |                            | 0.78               | AR, EHF, HPN, LMNA, NDRG1, NFKBIA, NKK3-1, STEAP2, TP52                                                                                                                                                                                                                                                                                                                                                                                                                                                                                                                                                                                                                                                                                                                                                                                                                                                                                                                                                                                                                                                                                                                                        | 9           |
| Cellular Movement                                                                | Invasion of prostate cancer cell lines                          | 5.04E-05 |                            | -0.181             | AGR2, AKAP12, AR, CDH1, EFN1, EFBF1, EFR, FOLH1, HPN, LMNA, NDRG1, NFKBIA, RAC1, SPDEF                                                                                                                                                                                                                                                                                                                                                                                                                                                                                                                                                                                                                                                                                                                                                                                                                                                                                                                                                                                                                                                                                                         | 14          |
| Cell-To-Cell Signaling and Interaction                                           | Interaction of prostate cancer cell lines                       | 5.97E-05 | Increased                  | 2.094              | AFAP1, AKAP12, AR, CDH1, EGF, FASN, IRS1, ITGA2, KLK3, NFKBIA, NRP1                                                                                                                                                                                                                                                                                                                                                                                                                                                                                                                                                                                                                                                                                                                                                                                                                                                                                                                                                                                                                                                                                                                            | 11          |
| Cancer, Organismal Injury and Abnormalities, Reproductive System Disease         | Neoplasia of prostate cancer cell lines                         | 8.57E-05 |                            | 1.069              | ALCAM, CCND1, CXADR, H0XB13, NDRG1, NFKBIA, TP52, WWTR1                                                                                                                                                                                                                                                                                                                                                                                                                                                                                                                                                                                                                                                                                                                                                                                                                                                                                                                                                                                                                                                                                                                                        | 8           |
| Cancer, Organismal Injury and Abnormalities                                      | Secondary tumor                                                 | 1.86E-04 |                            | 0.13               | ALCAM, H0XB13, NDRG1, NFKBIA, SERPINE1, WWTR1                                                                                                                                                                                                                                                                                                                                                                                                                                                                                                                                                                                                                                                                                                                                                                                                                                                                                                                                                                                                                                                                                                                                                  | 6           |
| Cell-To-Cell Signaling and Interaction                                           | Binding of prostate cancer cell lines                           | 2.09E-04 |                            | 1.891              | AFAP1, AKAP12, AR, CDH1, EGF, IRS1, ITGA2, KLK3, NFKBIA, NRP1                                                                                                                                                                                                                                                                                                                                                                                                                                                                                                                                                                                                                                                                                                                                                                                                                                                                                                                                                                                                                                                                                                                                  | 10          |
| Cell Death and Survival                                                          | Necrosis of prostate cancer cell lines                          | 3.19E-04 |                            | 0.335              | ADI1, AGR2, AKAP12, ALCAM, AR, CASP3, EDN1, EGF, EGFR, EHF, FASN, GDF15, HPN, HSPD1, JUN, KLK3, NDRG1, NFKBIA, PAWR, PRKAA2, SRC, TGFBR2, TP52, UACA, VEGFC                                                                                                                                                                                                                                                                                                                                                                                                                                                                                                                                                                                                                                                                                                                                                                                                                                                                                                                                                                                                                                    | 25          |
| Cancer, Organismal Injury and Abnormalities, Reproductive System Disease         | Metastasis of prostate cancer cell lines                        | 4.18E-04 |                            | 0.762              | ALCAM, H0XB13, NDRG1, NFKBIA, WWTR1                                                                                                                                                                                                                                                                                                                                                                                                                                                                                                                                                                                                                                                                                                                                                                                                                                                                                                                                                                                                                                                                                                                                                            | 5           |
| Cellular Movement                                                                | Migration of prostate cancer cell lines                         | 4.67E-04 |                            | 1.305              | AFAP1, AR, CDH1, EDN1, EGF, EGFR, EHF, GDF15, HSP90B1, IGF1R, LMNA, NDRG1, RAC1, SPDEF, TRPM8, WWTR1                                                                                                                                                                                                                                                                                                                                                                                                                                                                                                                                                                                                                                                                                                                                                                                                                                                                                                                                                                                                                                                                                           | 16          |
| Cell Death and Survival                                                          | Apoptosis of prostate cancer cell lines                         | 5.07E-04 |                            | 0.599              | ADI1, AKAP12, ALCAM, AR, CASP3, EDN1, EGF, EGFR, EHF, FASN, GDF15, HPN, HSPD1, JUN, KLK3, NDRG1, NFKBIA, PAWR, PRKAA2, SRC, TP52, UACA                                                                                                                                                                                                                                                                                                                                                                                                                                                                                                                                                                                                                                                                                                                                                                                                                                                                                                                                                                                                                                                         | 22          |
| Cellular Assembly and Organization, Cellular Function and Maintenance            | Retraction of filaments                                         | 6.15E-04 |                            |                    | EFN1, PTK2, SRC                                                                                                                                                                                                                                                                                                                                                                                                                                                                                                                                                                                                                                                                                                                                                                                                                                                                                                                                                                                                                                                                                                                                                                                | 3           |
| Cell Cycle                                                                       | S phase of prostate cancer cell lines                           | 8.76E-04 |                            |                    | AR, CCND1, PMEP1, SRC                                                                                                                                                                                                                                                                                                                                                                                                                                                                                                                                                                                                                                                                                                                                                                                                                                                                                                                                                                                                                                                                                                                                                                          | 4           |
| Cell Morphology                                                                  | Morphology of prostate cancer cell lines                        | 9.21E-04 |                            |                    | CDH1, EGFR, FASN, GDF15, HSP90AA1, IGF1R, SPDEF                                                                                                                                                                                                                                                                                                                                                                                                                                                                                                                                                                                                                                                                                                                                                                                                                                                                                                                                                                                                                                                                                                                                                | 7           |
| Cell Cycle                                                                       | Interphase of prostate cancer cell lines                        | 9.21E-04 |                            | 0.152              | AR, CCND1, DAB2, H0XB13, KLK3, PMEP1, SRC                                                                                                                                                                                                                                                                                                                                                                                                                                                                                                                                                                                                                                                                                                                                                                                                                                                                                                                                                                                                                                                                                                                                                      | 7           |
| Cell Death and Survival                                                          | Apoptosis of carcinoma cell lines                               | 1.47E-03 |                            |                    | ADI1, IGF1R, PAWR                                                                                                                                                                                                                                                                                                                                                                                                                                                                                                                                                                                                                                                                                                                                                                                                                                                                                                                                                                                                                                                                                                                                                                              | 3           |
| Cell-To-Cell Signaling and Interaction, Cellular Assembly and Organization       | Cell-cell contact                                               | 2.83E-03 |                            |                    | CDH1, EGF, FASN                                                                                                                                                                                                                                                                                                                                                                                                                                                                                                                                                                                                                                                                                                                                                                                                                                                                                                                                                                                                                                                                                                                                                                                | 3           |
| Cell-To-Cell Signaling and Interaction                                           | Adhesion of prostate cancer cell lines                          | 4.89E-03 | Increased                  | 2.423              | AFAP1, AKAP12, CDH1, IGF1R, KLK3, NFKBIA                                                                                                                                                                                                                                                                                                                                                                                                                                                                                                                                                                                                                                                                                                                                                                                                                                                                                                                                                                                                                                                                                                                                                       | 6           |
| Cell Cycle                                                                       | Cell cycle progression                                          | 6.07E-03 |                            | 1.948              | AR, CCND1, EGF, EHF, FOXA1, IGF1R, TACC2                                                                                                                                                                                                                                                                                                                                                                                                                                                                                                                                                                                                                                                                                                                                                                                                                                                                                                                                                                                                                                                                                                                                                       | 7           |
| Cell Cycle                                                                       | Cell cycle progression of prostate cancer cell lines            | 6.98E-03 |                            | 1.718              | AR, CCND1, EGF, EHF, FOXA1, TACC2                                                                                                                                                                                                                                                                                                                                                                                                                                                                                                                                                                                                                                                                                                                                                                                                                                                                                                                                                                                                                                                                                                                                                              | 6           |
| Tissue Morphology                                                                | Quantity of prostate cancer cell lines                          | 7.30E-03 |                            |                    | AR, CCND1, HPN                                                                                                                                                                                                                                                                                                                                                                                                                                                                                                                                                                                                                                                                                                                                                                                                                                                                                                                                                                                                                                                                                                                                                                                 | 3           |
| Cancer, Organismal Injury and Abnormalities, Tissue Morphology, Tumor Morphology | Size of tumor                                                   | 8.55E-03 |                            |                    | NRP1, SERPINE1                                                                                                                                                                                                                                                                                                                                                                                                                                                                                                                                                                                                                                                                                                                                                                                                                                                                                                                                                                                                                                                                                                                                                                                 | 2           |
| Cell Morphology                                                                  | Cell rounding of prostate cancer cell lines                     | 8.55E-03 |                            |                    | AKAP12, EFN1                                                                                                                                                                                                                                                                                                                                                                                                                                                                                                                                                                                                                                                                                                                                                                                                                                                                                                                                                                                                                                                                                                                                                                                   | 2           |
| Cell Death and Survival                                                          | Apoptosis of adenocarcinoma cell lines                          | 8.55E-03 |                            |                    | ADI1, NDRG1                                                                                                                                                                                                                                                                                                                                                                                                                                                                                                                                                                                                                                                                                                                                                                                                                                                                                                                                                                                                                                                                                                                                                                                    | 2           |
| Cellular Development                                                             | Epithelial-mesenchymal transition of prostate cancer cell lines | 1.00E-02 |                            | 1.452              | ARHGAP21, EGF, EGFR, NDRG1, NRP1                                                                                                                                                                                                                                                                                                                                                                                                                                                                                                                                                                                                                                                                                                                                                                                                                                                                                                                                                                                                                                                                                                                                                               | 5           |
| Gene Expression                                                                  | Expression of RNA                                               | 1.48E-02 |                            | 1.121              | AR, CDH1, EGF, NFKBIA                                                                                                                                                                                                                                                                                                                                                                                                                                                                                                                                                                                                                                                                                                                                                                                                                                                                                                                                                                                                                                                                                                                                                                          | 4           |
| Cellular Movement                                                                | Movement of adenocarcinoma cell lines                           | 1.65E-02 |                            |                    | NDRG1, NRP1                                                                                                                                                                                                                                                                                                                                                                                                                                                                                                                                                                                                                                                                                                                                                                                                                                                                                                                                                                                                                                                                                                                                                                                    | 2           |
| Cellular Development, Cellular Growth and Proliferation                          | Development of prostate cancer cell lines                       | 1.65E-02 |                            |                    | AR, COBLL1                                                                                                                                                                                                                                                                                                                                                                                                                                                                                                                                                                                                                                                                                                                                                                                                                                                                                                                                                                                                                                                                                                                                                                                     | 2           |
| Cell Cycle                                                                       | G1 phase of prostate cancer cell lines                          | 2.09E-02 |                            |                    | CCND1, DAB2, H0XB13, KLK3                                                                                                                                                                                                                                                                                                                                                                                                                                                                                                                                                                                                                                                                                                                                                                                                                                                                                                                                                                                                                                                                                                                                                                      | 4           |
| Cell-To-Cell Signaling and Interaction, Cellular Assembly and Organization       | Cell-cell contact of prostate cancer cell lines                 | 2.65E-02 |                            |                    | CDH1, FASN                                                                                                                                                                                                                                                                                                                                                                                                                                                                                                                                                                                                                                                                                                                                                                                                                                                                                                                                                                                                                                                                                                                                                                                     | 2           |
| Cancer                                                                           | Transformation of prostate cancer cell lines                    | 2.65E-02 |                            |                    | IGF1R, IGF1                                                                                                                                                                                                                                                                                                                                                                                                                                                                                                                                                                                                                                                                                                                                                                                                                                                                                                                                                                                                                                                                                                                                                                                    | 2           |
| Gene Expression                                                                  | Transcription of RNA                                            | 3.04E-02 |                            |                    | AR, CDH1, EGF                                                                                                                                                                                                                                                                                                                                                                                                                                                                                                                                                                                                                                                                                                                                                                                                                                                                                                                                                                                                                                                                                                                                                                                  | 3           |
| Cellular Movement                                                                | Dissemination of prostate cancer cell lines                     | 3.83E-02 |                            |                    | EGFR, IGF1R                                                                                                                                                                                                                                                                                                                                                                                                                                                                                                                                                                                                                                                                                                                                                                                                                                                                                                                                                                                                                                                                                                                                                                                    | 2           |
| Cellular Assembly and Organization, Cellular Function and Maintenance            | Organization of cytoskeleton                                    | 4.47E-02 |                            |                    | AKAP12, AR, EFN1                                                                                                                                                                                                                                                                                                                                                                                                                                                                                                                                                                                                                                                                                                                                                                                                                                                                                                                                                                                                                                                                                                                                                                               | 3           |

## Downregulated Genes: Disease and Function

| Categories                                                        | Diseases or Functions Annotation          | p-value  | Genes             | # Molecules |
|-------------------------------------------------------------------|-------------------------------------------|----------|-------------------|-------------|
| Cellular Function and Maintenance                                 | Progression of prostate cancer cell lines | 1.39E-02 | FGFR1,IL1B        | 2           |
| Cell Signaling,Molecular Transport,Vitamin and Mineral Metabolism | Mobilization of Ca2+                      | 3.97E-02 | CNR2,GPR55,WNT10B | 3           |
